# Supplementary material for: Polyketide synthase and non-ribosomal peptide synthetase thioesterase selectivity: logic gate or a victim of fate?
Source: Royal Society of Chemistry journal article supplement (doi:10.1039/c4np00148f), 2015-02-02
Supplement: c4np00148f3.pdf [file c4np00148f3.pdf]

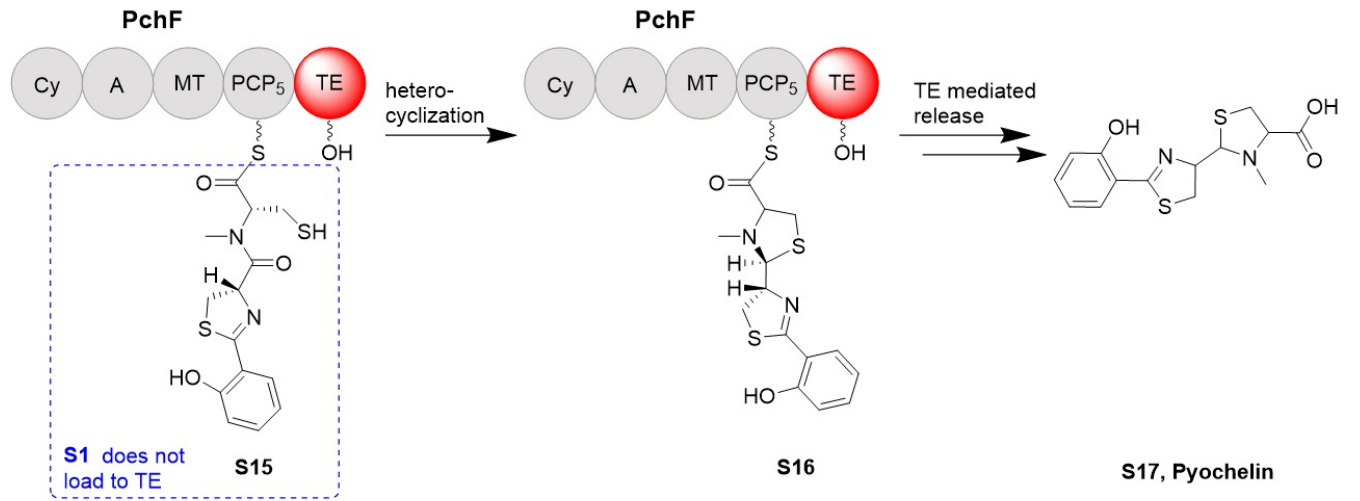

**Fig. S4:** Terminal ring-specific release of pyochelin precursor is supported by PchF TE's substrate specificity
