# Supplementary material for: Polyketide synthase and non-ribosomal peptide synthetase thioesterase selectivity: logic gate or a victim of fate?
Source: Royal Society of Chemistry journal article supplement (doi:10.1039/c4np00148f), 2015-02-02
Supplement: c4np00148f5.nwk [file c4np00148f5.nwk]

(Te.P.aeru_esterase:5.07403,
((Sare_0362_gb_NC_009953.1_Actinobacteria_-_Salinispora_arenicola:1.92976,
(((((TMO_0595_gb_NC_017956.1_Proteobacteria_Alpha_-_Tistrella_mobilis:1.69960,
(Strop_0688_gb_NC_009380.1_Actinobacteria_-_Salinispora_tropica_C:1.8895,
(Dtox_2674_gb_CP001720.0_Firmicutes_-_Desulfotomaculum_acetoxidan:1.44596,
CKL_1511_gb_NC_009706.1_Firmicutes_-_Clostridium_kluyveri_DSM_55:2.04733)
0.8740000000:0.73642)0.7620000000:0.3556)0.7580000000:0.20265,
((epF.g.AF217189.1_Proteobacteria_Delta_-_Sorangium_cellulosum_Epo:0.0,
epE.g.AF210843.1_Proteobacteria_Delta_-_Sorangium_cellulosum_Epo:0.00692)
1.0000000000:2.93629,
(((alI.g.AJ586576.1_Proteobacteria_Gamma_-_Xanthomonas_albilineans:1.49515,
sna.g.FN563144.1_Actinobacteria_-_Streptomyces_pristinaespiralis:1.54615)
0.8050000000:0.4738,
((amb.g.DQ897667.1_Proteobacteria_Delta_-_Sorangium_cellulosum_Amb:2.2279,
vl.g.DQ174261.1_Actinobacteria_-_Streptomyces_tsusimaensis_Valin:1.34037)
0.8950000000:0.51780,
(mm.g.AF318063.2_Proteobacteria_Gamma_-_Pseudomonas_fluorescens_M:0.97082,
(ADA82585.1_gb_FJ823461.1_Unknown_-_uncultured_bacterium_psy1_Psy:2.34989,
en_2:1.74509)0.8340000000:0.45782)0.5000000000:0.20259)0.8820000000:0.23347)
0.0000000000:0.00002,((F.CHICK:0.1555,F.HUMAN:0.11912)0.9990000000:1.98263,
bac.g.AF007865.2_Firmicutes_-_Bacillus_licheniformis_Bacitracin:1.90553)
0.7600000000:0.27140)0.0000000000:0.0)0.0000000000:0.0)0.7390000000:0.04382,
((MXAN_1607_gb_NC_008095.1_Proteobacteria_Delta_-_Myxococcus_xanth:1.25332,
(sc8.g.NC_010162.1_Proteobacteria_Delta_-_Sorangium_cellulosum_So:1.38015,
RS032.g.NC_003296.1_Proteobacteria_Beta_-_Ralstonia_solanacearum:1.13116)
0.7970000000:0.28676)0.9300000000:0.48349,
(MXAN_4079_gb_NC_008095.1_Proteobacteria_Delta_-_Myxococcus_xanth:1.06528,
sc3.g.NC_010162.1_Proteobacteria_Delta_-_Sorangium_cellulosum_So:1.8907)
0.8380000000:0.31975)0.7090000000:0.08992)0.7160000000:0.0199,
BT.I.gb_CP000085.0_Proteobacteria_Beta_-_Burkholderia_thailanden:2.69575)
0.0000000000:0.0,
(PA20.g.NC_002516.2_Proteobacteria_Gamma_-_Pseudomonas_aeruginosa:2.58692,
CuracinTE:3.76810)0.0000000000:0.1692)0.0000000000:0.0)0.0000000000:0.0,
((((((Radicicol:0.16114,(dehydrocurvulacin:0.39881,
PK13.g.DQ019316.1_Eukaryota_Fungi_-_Gibberella_zeae_Zearalenone:0.20750)
0.4590000000:0.08749)1.0000000000:1.37730,((((((pkL.gb:0.0,PKL.ASPPA:0.0)
0.9630000000:0.10498,(pkS.gb:0.10993,
pkA.g.DQ149246.3_Eukaryota_Fungi_-_Mycosphaerella_pini_Dothistro:0.20111)
0.7520000000:0.04658)0.9990000000:0.41748,
AAT69682.1_gb_AY649543.1_Eukaryota_Fungi_-_Cercospora_nicotianae:0.63183)
0.9830000000:0.25535,((w.gb:0.13322,
al1.g.AF025541.1_Eukaryota_Fungi_-_Aspergillus_fumigatus_THN_T1P:0.08836)
0.9960000000:0.22329,
pk4.g.AJ278141.1_Eukaryota_Fungi_-_Gibberella_fujikuroi_Bikaveri:0.37807)
0.8310000000:0.11804)0.9170000000:0.15713,
PK1.g.AF130309.3_Eukaryota_Fungi_-_Exophiala_dermatitidis_THN_T1:0.43093)
0.7920000000:0.09729,
((pk1.g.AF151533.1_Eukaryota_Fungi_-_Nodulisporium_sp._ATCC74245_T:0.12122,
(PK1.gb:0.0,P79.GLOLA:0.0)0.9990000000:0.09800)0.8800000000:0.08203,
pk1.g.AF549411.1_Eukaryota_Fungi_-_Glarea_lozoyensis_THN_T1PKS_T:0.15351)
0.9890000000:0.33637)0.2490000000:0.18079)1.0000000000:1.37826,
Ndas_1741_gb_NC_014210.1_Actinobacteria_-_Nocardiopsis_dassonvil:1.46113)
0.1140000000:0.14442,
((MAP_3742_gb_AE016958.1_Actinobacteria_-_Mycobacterium_avium_subs:0.61994,
(((Ndas_1761_gb_NC_014210.1_Actinobacteria_-_Nocardiopsis_dassonvil:0.3337,
(Ndas_1030_gb_NC_014210.1_Actinobacteria_-_Nocardiopsis_dassonvil:0.15032,
SC7.g.NC_003888.3_Actinobacteria_-_Streptomyces_coelicolor_A3_2:0.20784)
1.0000000000:0.3739)0.6890000000:0.07551,
(SVEN_0517_gb_FR845719.0_Actinobacteria_-_Streptomyces_venezuelae:0.34626,
pch.g.EU088199.1_Proteobacteria_Gamma_-_Pseudomonas_fluorescens:0.2997)
0.9970000000:0.22428)0.6800000000:0.06413,
(PA4.g.NC_002516.2_Proteobacteria_Gamma_-_Pseudomonas_aeruginosa:0.0,
pch.g.AF074705.2_Proteobacteria_Gamma_-_Pseudomonas_aeruginosa_P:0.0)
1.0000000000:0.92703)0.1510000000:0.09163)0.7690000000:0.21082,
Y0.g.NC_003143.1_Proteobacteria_Gamma_-_Yersinia_pestis_CO92_NRP:0.58069)
1.0000000000:1.89087)0.4400000000:0.23522,((FabA:4.44257,
(((((((((Francci3_2459_gb_NC_007777.1_Actinobacteria_-_Frankia_sp._CcI3_N:0.44263,
ADK54821.1_gb_GQ475282.1_Unknown_-_uncultured_soil_bacterium_T3P:0.31073)
0.9750000000:0.21415,
((((teg.g.EU874253.1_Unknown_-_uncultured_soil_bacterium_NRPS_Thioes:0.06562,
((ve.g.EU874252.1_Unknown_-_uncultured_soil_bacterium_NRPS_Thioest:0.07207,
(bp.gb:0.06434,
vc.g.HQ679900.1_Actinobacteria_-_Amycolatopsis_orientalis_HCCB10:0.06306)
0.9330000000:0.03457)0.9900000000:0.0554,
(tc.g.AJ605139.1_Actinobacteria_-_Actinoplanes_teichomyceticus_Te:0.00456,
tei.g.AJ632270.1_Actinobacteria_-_Actinoplanes_teichomyceticus_T:0.01911)
0.9710000000:0.05124)0.8480000000:0.02981)0.9870000000:0.09595,
AAM80536.1_gb_U82965.2_Actinobacteria_-_Streptomyces_toyocaensis:0.14537)
0.0780000000:0.06931,
db.g.AJ561198.1_Actinobacteria_-_Nonomuraea_sp._ATCC_39727_A4092:0.19767)
0.9990000000:0.27150,
AAK81827.1_gb_AF386507.1_Actinobacteria_-_Streptomyces_lavendula:0.31776)
0.9850000000:0.23232)0.9380000000:0.16787,
Tcur_1888_gb_NC_013510.1_Actinobacteria_-_Thermomonospora_curvat:0.52249)
0.7810000000:0.06558,
((SGR_3264_gb_NC_010572.1_Actinobacteria_-_Streptomyces_griseus_su:0.49770,
(snb.g.FN563143.1_Actinobacteria_-_Streptomyces_pristinaespiralis:0.0,
O0.STRPR:0.0)1.0000000000:0.51807)0.8700000000:0.11149,
(((RH.r231.gb_NC_008268.1_Actinobacteria_-_Rhodococcus_jostii_RHA1:0.01521,
ROP_20370_gb_NC_012522.1_Actinobacteria_-_Rhodococcus_opacus_B4:0.00675)
1.0000000000:0.51988,
(((BA_2372_gb_NC_003997.3_Firmicutes_-_Bacillus_anthracis_str._Ames:0.12685,
BS3.g.NC_000964.3_Firmicutes_-_Bacillus_subtilis_subsp._subtilis:0.15766)
0.5290000000:0.05213,
pae.g.HQ668144.1_Firmicutes_-_Paenibacillus_elgii_B69_Paenibacti:0.16170)
0.9850000000:0.20346,
SGR_6739_gb_NC_010572.1_Actinobacteria_-_Streptomyces_griseus_su:0.54043)
0.8780000000:0.11939)0.9360000000:0.12566,
ac.g.HM038106.1_Actinobacteria_-_Streptomyces_anulatus_Actinomyc:0.61864)
0.7350000000:0.04569)0.2540000000:0.06170)0.5480000000:0.08989,
((VAB18032_24915_gb_NC_015434.0_Actinobacteria_-_Verrucosispora_ma:0.45873,
VAB18032_22305_gb_NC_015434.0_Actinobacteria_-_Verrucosispora_ma:0.55606)
0.9810000000:0.25617,
(SVEN_7440_gb_FR845719.0_Actinobacteria_-_Streptomyces_venezuelae:0.61196,
SACE_4287_gb_NC_009142.1_Actinobacteria_-_Saccharopolyspora_eryt:0.55875)
0.7580000000:0.2297)0.6720000000:0.13669)0.5600000000:0.0938,
(((SAV_865_gb_NC_003155.4_Actinobacteria_-_Streptomyces_avermitilis:0.72151,
en.g.DQ403252.1_Actinobacteria_-_Streptomyces_fungicidicus_Endur:0.68233)
0.8890000000:0.1803,
(ABO_1784_gb_NC_008260.1_Proteobacteria_Gamma_-_Alcanivorax_borku:0.74235,
(MSMEG_0019_gb_NC_008596.1_Actinobacteria_-_Mycobacterium_smegmat:0.0,
MSMEG_0019_gb_CP000480.1_Actinobacteria_-_Mycobacterium_smegmati:0.0)
1.0000000000:0.73164)0.9570000000:0.29653)0.5200000000:0.09611,
((SGR_653_gb_NC_010572.1_Actinobacteria_-_Streptomyces_griseus_sub:0.32235,
nf72.g.NC_006361.1_Actinobacteria_-_Nocardia_farcinica_IFM_10152:0.61556)
0.9750000000:0.30876,
(SC3.g.NC_003888.3_Actinobacteria_-_Streptomyces_coelicolor_A3_2:0.54389,
(pstD.g.AJ488769.3_Actinobacteria_-_Actinoplanes_friuliensis_Friu:0.45830,
dp.g.AY787762.1_Actinobacteria_-_Streptomyces_roseosporus_NRRL_1:0.494)
0.3170000000:0.08508)0.9600000000:0.16332)0.3570000000:0.05377)
0.7260000000:0.0987)0.5240000000:0.08434,
(SVEN_6264_gb_NC_018750.1_Actinobacteria_-_Streptomyces_venezuela:1.20217,
(SACE_2696_gb_NC_009142.1_Actinobacteria_-_Saccharopolyspora_eryt:0.86988,
(MAP_1420_gb_AE016958.1_Actinobacteria_-_Mycobacterium_avium_subs:0.0,
MAV_3056_gb_CP000479.1_Actinobacteria_-_Mycobacterium_avium_104:0.0)
1.0000000000:0.75887)0.9020000000:0.33484)0.3320000000:0.1567)
0.8700000000:0.11252,
(((RH.r545.gb_NC_008268.1_Actinobacteria_-_Rhodococcus_jostii_RHA1:0.30116,
ROP_55220_gb_NC_012522.1_Actinobacteria_-_Rhodococcus_opacus_B4:0.31214)
1.0000000000:0.4862,
((RH.r6.gb_NC_008268.1_Actinobacteria_-_Rhodococcus_jostii_RHA1_NR:0.51512,
(nf2.g.NC_006361.1_Actinobacteria_-_Nocardia_farcinica_IFM_10152:0.32299,
nf11.g.NC_006361.1_Actinobacteria_-_Nocardia_farcinica_IFM_10152:0.45402)
0.9560000000:0.19023)0.9010000000:0.092,
((RH.r546.gb_NC_008268.1_Actinobacteria_-_Rhodococcus_jostii_RHA1:0.48709,
(ROP_33190_gb_NC_012522.1_Actinobacteria_-_Rhodococcus_opacus_B4:0.36062,
ROP_54870_gb_NC_012522.1_Actinobacteria_-_Rhodococcus_opacus_B4:0.31659)
0.8920000000:0.09810)0.5770000000:0.10355,
((nf719.g.NC_006361.1_Actinobacteria_-_Nocardia_farcinica_IFM_1015:0.16145,
nf718.g.NC_006361.1_Actinobacteria_-_Nocardia_farcinica_IFM_1015:0.12094)
0.9930000000:0.21043,
nf5.g.NC_006361.1_Actinobacteria_-_Nocardia_farcinica_IFM_10152:0.24683)
0.9990000000:0.30914)0.5060000000:0.05203)0.7510000000:0.06882)
0.5590000000:0.06581,
((((RH.r239.gb_NC_008268.1_Actinobacteria_-_Rhodococcus_jostii_RHA1:0.09518,
ROP_21090_gb_NC_012522.1_Actinobacteria_-_Rhodococcus_opacus_B4:0.09045)
0.9990000000:0.35234,
nf3.g.NC_006361.1_Actinobacteria_-_Nocardia_farcinica_IFM_10152:0.4075)
0.9330000000:0.13114,
((((RH.r513.gb_NC_008268.1_Actinobacteria_-_Rhodococcus_jostii_RHA1:0.04173,
ROP_51640_gb_NC_012522.1_Actinobacteria_-_Rhodococcus_opacus_B4:0.05642)
0.9750000000:0.0814,
(RH.r512.gb_NC_008268.1_Actinobacteria_-_Rhodococcus_jostii_RHA1:0.02961,
ROP_51630_gb_NC_012522.1_Actinobacteria_-_Rhodococcus_opacus_B4:0.031)
0.9900000000:0.10562)0.9990000000:0.23256,
((RH.r011.gb_NC_008268.1_Actinobacteria_-_Rhodococcus_jostii_RHA1:0.03125,
ROP_02580_gb_NC_012522.1_Actinobacteria_-_Rhodococcus_opacus_B4:0.0264)
0.9930000000:0.18925,
(RH.r22.gb_NC_008268.1_Actinobacteria_-_Rhodococcus_jostii_RHA1_N:0.04076,
ROP_19210_gb_NC_012522.1_Actinobacteria_-_Rhodococcus_opacus_B4:0.04359)
1.0000000000:0.41661)0.3310000000:0.08807)0.8890000000:0.1179,
RH.r02.gb_NC_008268.1_Actinobacteria_-_Rhodococcus_jostii_RHA1_N:0.51361)
0.9910000000:0.20796)0.6060000000:0.04239,
((RH.r04.gb_NC_008268.1_Actinobacteria_-_Rhodococcus_jostii_RHA1_N:0.06019,
ROP_04690_gb_NC_012522.1_Actinobacteria_-_Rhodococcus_opacus_B4:0.07440)
1.0000000000:0.38504,
(RH.r014.gb_NC_008268.1_Actinobacteria_-_Rhodococcus_jostii_RHA1:0.07549,
ROP_02610_gb_NC_012522.1_Actinobacteria_-_Rhodococcus_opacus_B4:0.02317)
1.0000000000:0.38963)0.9300000000:0.12781)0.8870000000:0.06979)
0.9620000000:0.1337)0.6960000000:0.05216,
((ST.g.NC_003198.1_Proteobacteria_Gamma_-_Salmonella_enterica_subs:0.00302,
(b0.g.NC_000913.2_Proteobacteria_Gamma_-_Escherichia_coli_str._K-:0.0,
EN.ECOLI:0.0)0.9450000000:0.19139)1.0000000000:1.12283,
Sare_4562_gb_NC_009953.1_Actinobacteria_-_Salinispora_arenicola:0.74762)
0.8420000000:0.15608)0.4970000000:0.27239)0.5140000000:0.09154,
(((((((Sare_2962_gb_NC_009953.1_Actinobacteria_-_Salinispora_arenicola:0.70212,
MXAN_4296_gb_NC_008095.1_Proteobacteria_Delta_-_Myxococcus_xanth:0.70803)
0.9290000000:0.34662,
tub.g.GU002154.1_Proteobacteria_Delta_-_Cystobacter_sp._SBCb004:0.87819)
0.9320000000:0.43606,
((((N.F3.gb_NC_010628.1_Cyanobacteria_-_Nostoc_punctiforme_PCC_73102:0.39357,
(N.R34.gb_NC_010628.1_Cyanobacteria_-_Nostoc_punctiforme_PCC_7310:0.40236,
((((N.F21.gb_NC_010628.1_Cyanobacteria_-_Nostoc_punctiforme_PCC_7310:0.29944,
MAE_60000_gb_NC_010296.1_Cyanobacteria_-_Microcystis_aeruginosa:0.39506)
0.9840000000:0.1584,
cr.g.EF159954.0_Cyanobacteria_-_Nostoc_sp._ATCC_53789_Cryptophyc:0.43374)
0.6330000000:0.07423,
N.R30.gb_NC_010628.1_Cyanobacteria_-_Nostoc_punctiforme_PCC_7310:0.36332)
0.9180000000:0.10037,
psm.g.AB279593.1_Cyanobacteria_-_Microcystis_aeruginosa_Micropep:0.48414)
0.9190000000:0.0936)0.8960000000:0.08452)0.6920000000:0.04685,
bar.g.AF516145.1_Cyanobacteria_-_Lyngbya_majuscula_Barbamide_NRP:0.57976)
0.7580000000:0.08766,
(((N.R6.gb_NC_010628.1_Cyanobacteria_-_Nostoc_punctiforme_PCC_73102:0.50355,
LYNGBM3L_57760_gb_GL890964.1_Cyanobacteria_-_Moorea_producta_3L:0.39946)
0.9360000000:0.18063,
(((PSPTO_2830_gb_NC_004578.1_Proteobacteria_Gamma_-_Pseudomonas_syr:0.25315,
ma_2:0.18313)0.8460000000:0.20374,
RS05.g.NC_003296.1_Proteobacteria_Beta_-_Ralstonia_solanacearum:0.40319)
1.0000000000:1.1111,
(MXAN_2798_gb_NC_008095.1_Proteobacteria_Delta_-_Myxococcus_xanth:0.41915,
((RGBS107_09711_gb_DS544878.1_Proteobacteria_Alpha_-_Phaeobacter_g:0.23425,
SP.g.NC_003911.11_Proteobacteria_Alpha_-_Ruegeria_pomeroyi_DSS-3:0.21343)
0.8470000000:0.12907,
SADFL11_1546_gb_EQ973121.1_Proteobacteria_Alpha_-_Labrenzia_alex:0.3386)
0.9980000000:0.44987)0.9320000000:0.26823)0.8050000000:0.11533)
0.9640000000:0.21666,
(AAS98787.1_gb_AY522504.1_Cyanobacteria_-_Lyngbya_majuscula_Jamai:0.47690,
lp.g.NC_002942.5_Proteobacteria_Gamma_-_Legionella_pneumophila_s:1.08275)
0.9140000000:0.22526)0.9210000000:0.14149)0.9770000000:0.17223,
((ped.g.AY328023.1_Unknown_-_symbiont_bacterium_of_Paederus_fuscip:0.79933,
mt.g.AF188287.1_Proteobacteria_Delta_-_Stigmatella_aurantiaca_DW:0.68949)
0.8620000000:0.19250,
((MXAN_3779_gb_NC_008095.1_Proteobacteria_Delta_-_Myxococcus_xanth:0.43327,
((MXAN_3618_gb_NC_008095.1_Proteobacteria_Delta_-_Myxococcus_xanth:0.49434,
MXAN_3636_gb_NC_008095.1_Proteobacteria_Delta_-_Myxococcus_xanth:0.41056)
0.5140000000:0.05856,
sc2.g.NC_010162.1_Proteobacteria_Delta_-_Sorangium_cellulosum_So:0.50877)
0.7360000000:0.05274)0.7700000000:0.05538,
(((ABBFA_003403_gb_NC_011595.1_Proteobacteria_Gamma_-_Acinetobacter:0.0,
(AB57_0157_gb_NC_011586.1_Proteobacteria_Gamma_-_Acinetobacter_ba:0.0,
AB.g.NC_010410.1_Proteobacteria_Gamma_-_Acinetobacter_baumannii:0.0)
0.0000000000:0.0)1.0000000000:1.0402,
MXAN_4000_gb_NC_008095.1_Proteobacteria_Delta_-_Myxococcus_xanth:0.51560)
0.3300000000:0.10373,
cn.g.AM988861.1_Proteobacteria_Delta_-_Chondromyces_crocatus_Cho:0.52852)
0.9050000000:0.15054)0.8350000000:0.07898)0.8850000000:0.11370)
0.5170000000:0.08462)0.0000000000:0.00001,
(de.g.EF210776.0_Proteobacteria_Beta_-_Chromobacterium_violaceum:1.16974,
((sc4.g.NC_010162.1_Proteobacteria_Delta_-_Sorangium_cellulosum_So:0.0,
chi.g.DQ065771.0_Proteobacteria_Delta_-_Sorangium_cellulosum_Chi:0.0)
0.9980000000:0.45450,
(dis.g.AJ874112.1_Proteobacteria_Delta_-_Sorangium_cellulosum_Dis:0.0,
ds.g.DQ013294.0_Proteobacteria_Delta_-_Sorangium_cellulosum_Diso:0.0)
0.9990000000:0.62222)0.9990000000:0.74661)0.7170000000:0.10244)
0.9980000000:0.32912,((((((PS28:0.24979,
ma.g.EU199081.2_Proteobacteria_Gamma_-_Pseudomonas_fluorescens_S:0.21883)
0.9220000000:0.1881,RS05:0.36975)0.9760000000:0.40808,
PSPTO_4699_gb_NC_004578.1_Proteobacteria_Gamma_-_Pseudomonas_syr:0.67496)
0.8030000000:0.2765,
sy.g.AF047828.1_Proteobacteria_Gamma_-_Pseudomonas_syringae_pv.:0.76769)
0.9000000000:0.22468,
((((((r.g.AM411073.1_Proteobacteria_Beta_-_Burkholderia_rhizoxinica_Rh:0.28552,
(dif.g.AJ634062.2_Firmicutes_-_Bacillus_amyloliquefaciens_FZB42_D:0.35068,
(Cpin_5289_gb_NC_013132.1_Bacteroidetes_-_Chitinophaga_pinensis_D:0.05511,
el.g.HQ680975.0_Bacteroidetes_-_Chitinophaga_sancti_Elansolid_T2:0.00395)
1.0000000000:0.40599)0.9140000000:0.08965)0.7920000000:0.04839,
(SGR_6777_gb_NC_010572.1_Actinobacteria_-_Streptomyces_griseus_su:0.60763,
MXAN_3932_gb_CP000113.1_Proteobacteria_Delta_-_Myxococcus_xanthu:0.35816)
0.0000000000:0.03892)0.8080000000:0.06612,
(((BS17.g.NC_000964.3_Firmicutes_-_Bacillus_subtilis_subsp._subtili:0.0,
PKR.BACSU:0.0)0.0000000000:0.0,
BS17.g.AL009126.3_Firmicutes_-_Bacillus_subtilis_subsp._subtilis:0.0)
0.9910000000:0.16414,
bae.g.AJ634060.0_Firmicutes_-_Bacillus_amyloliquefaciens_FZB42_B:0.32559)
0.9810000000:0.17877)0.0020000000:0.10959,
(ACY01402.1_gb_GQ274954.0_Actinobacteria_-_Streptomyces_amphibios:0.11697,
ACY01392.1_gb_GQ274953.0_Actinobacteria_-_Streptomyces_platensis:0.20085)
0.9990000000:0.5256)0.9890000000:0.69241,
((oo.g.JX315603.1_Proteobacteria_Gamma_-_Serratia_marcescens_Oocyd:0.04987,
oo.g.JX315604.1_Proteobacteria_Gamma_-_Serratia_plymuthica_Oocyd:0.06408)
0.9470000000:0.50954,
ABK51302.1_gb_EF032014.0_Proteobacteria_Gamma_-_Candidatus_Endob:1.01726)
0.8980000000:0.43533)0.9950000000:0.80294,
PSPTO_4519_gb_NC_004578.1_Proteobacteria_Gamma_-_Pseudomonas_syr:1.38746)
0.5570000000:0.12796)0.9450000000:0.29513,
((((PA3.g.NC_002516.2_Proteobacteria_Gamma_-_Pseudomonas_aeruginosa:0.72685,
(PSPTO_2600_gb_NC_004578.1_Proteobacteria_Gamma_-_Pseudomonas_syr:0.54053,
(Y1.g.NC_003143.1_Proteobacteria_Gamma_-_Yersinia_pestis_CO92_NRP:0.0,
ir.gb:0.01682)0.9650000000:0.28815)1.0000000000:0.77838)0.7890000000:0.16289,
(Sare_2072_gb_NC_009953.1_Actinobacteria_-_Salinispora_arenicola:0.02049,
Strop_2654_gb_NC_009380.1_Actinobacteria_-_Salinispora_tropica_C:0.08777)
1.0000000000:1.0745)0.8390000000:0.20147,
((SC6.g.NC_003888.3_Actinobacteria_-_Streptomyces_coelicolor_A3_2:1.06956,
SVEN_6202_gb_FR845719.0_Actinobacteria_-_Streptomyces_venezuelae:0.77117)
0.2640000000:0.10217,
VAB18032_07080_gb_NC_015434.0_Actinobacteria_-_Verrucosispora_ma:0.5731)
1.0000000000:0.80442)0.7340000000:0.13273,
((((((RH.r4.gb_NC_008268.1_Actinobacteria_-_Rhodococcus_jostii_RHA1_T1:0.0,
ROP_39430_gb_NC_012522.1_Actinobacteria_-_Rhodococcus_opacus_B4:0.00757)
0.9840000000:0.139,
nf18.g.NC_006361.1_Actinobacteria_-_Nocardia_farcinica_IFM_10152:0.41282)
0.9110000000:0.16832,
(((Mmcs_5010_gb_CP000384.1_Actinobacteria_-_Mycobacterium_sp._MCS_T:0.0,
(Mkms_5098_gb_CP000518.1_Actinobacteria_-_Mycobacterium_sp._KMS_T:0.0,
Mjls_5391_gb_CP000580.1_Actinobacteria_-_Mycobacterium_sp._JLS_T:0.0)
0.0000000000:0.0)0.9930000000:0.08387,
(((Mflv_1169_gb_NC_009338.1_Actinobacteria_-_Mycobacterium_gilvum_P:0.0,
Mspyr1_50180_gb_NC_014814.0_Actinobacteria_-_Mycobacterium_gilvu:0.0)
0.9960000000:0.07080,
Mvan_5640_gb_CP000511.1_Actinobacteria_-_Mycobacterium_vanbaalen:0.07629)
0.3280000000:0.03357,
((MUL_4983_gb_NC_008611.1_Actinobacteria_-_Mycobacterium_ulcerans:0.02003,
(MT3.g.NC_002755.2_Actinobacteria_-_Mycobacterium_tuberculosis_CD:0.0,
Rv3.g.NC_000962.2_Actinobacteria_-_Mycobacterium_tuberculosis_H3:0.0)
0.9220000000:0.02493)0.9880000000:0.06310,
(MAP_0220_gb_AE016958.1_Actinobacteria_-_Mycobacterium_avium_subs:0.0,
MAV_0218_gb_CP000479.1_Actinobacteria_-_Mycobacterium_avium_104:0.00592)
0.9700000000:0.05398)0.7370000000:0.02544)0.8180000000:0.01982)
0.6650000000:0.03295,
MSMEG_6392_gb_CP000480.1_Actinobacteria_-_Mycobacterium_smegmati:0.0924)
0.5260000000:0.0995)0.9990000000:0.84956,
Tcur_4756_gb_NC_013510.1_Actinobacteria_-_Thermomonospora_curvat:0.21827)
1.0000000000:1.01829,
(sc6.g.NC_010162.1_Proteobacteria_Delta_-_Sorangium_cellulosum_So:0.32657,
sc0.g.NC_010162.1_Proteobacteria_Delta_-_Sorangium_cellulosum_So:0.26766)
0.9890000000:0.72642)0.3250000000:0.35025,
ME.g.NC_012988.1_Proteobacteria_Alpha_-_Methylobacterium_extorqu:1.69755)
0.7010000000:0.20897)0.5950000000:0.14357)0.8170000000:0.0978)
0.8920000000:0.09650,
(((RS030.g.NC_003296.1_Proteobacteria_Beta_-_Ralstonia_solanacearum:1.94282,
N.F24.gb_NC_010628.1_Cyanobacteria_-_Nostoc_punctiforme_PCC_7310:0.82296)
0.9150000000:0.46986,
RSc.g.NC_003295.1_Proteobacteria_Beta_-_Ralstonia_solanacearum_G:1.67808)
0.0000000000:0.00894,
RGBS107_02943_gb_DS544878.1_Proteobacteria_Alpha_-_Phaeobacter_g:1.42039)
0.6600000000:0.20056)0.6790000000:0.05266,
((ABO_2092_gb_NC_008260.1_Proteobacteria_Gamma_-_Alcanivorax_borku:1.21961,
PSPTO_2150_gb_NC_004578.1_Proteobacteria_Gamma_-_Pseudomonas_syr:0.71071)
0.9890000000:0.89282,
z.g.FJ430564.1_Firmicutes_-_Bacillus_cereus_Zwittermicin_T1PKS-N:1.22891)
0.5500000000:0.22814)0.7390000000:0.07233)0.2830000000:0.13334)
0.8480000000:0.0967,
((ykris0001_35400_gb_NZ_ACCA01000001.1_Proteobacteria_Gamma_-_Yers:1.90083,
((((Q034.STRHY:0.55712,P727.PSEAI:0.4137)0.8220000000:0.10500,
(((Q56.YERPE:0.30419,AN.VIBAN:0.56748)0.9960000000:0.27386,SRD.BACSU:0.55076)
0.9800000000:0.23930,(Q033.STRHY:0.56034,
(((((cce_3761_gb_CP000806.1_Cyanobacteria_-_Cyanothece_sp._ATCC_51142:0.87791,
gl4.g.NC_005125.1_Cyanobacteria_-_Gloeobacter_violaceus_PCC_7421:0.33308)
0.4440000000:0.06501,
gl5.g.NC_005125.1_Cyanobacteria_-_Gloeobacter_violaceus_PCC_7421:0.3609)
0.8550000000:0.10974,
(AFV96142.1_gb_JX477167.0_Cyanobacteria_-_Cylindrospermum_licheni:0.61394,
(pel.g.HE616533.1_Proteobacteria_Delta_-_Sorangium_cellulosum_Pel:0.19548,
j.g.DQ897668.0_Proteobacteria_Delta_-_Sorangium_cellulosum_Jeran:0.28607)
0.9970000000:0.32977)0.8530000000:0.13005)0.9940000000:0.344,(GT.ANEMI:0.40879,
((SAS.RAT:0.38768,SAS.ANAPL:0.48185)0.9990000000:0.35650,O301.BREBE:0.68350)
0.1070000000:0.06570)0.6020000000:0.04885)0.7670000000:0.06865,
P721.PSEAI:0.76999)0.7610000000:0.09266)0.8540000000:0.07786)
0.9000000000:0.09875)0.2260000000:0.06818,((Q00.SACER:0.35898,
((((VAB18032_22195_gb_NC_015434.0_Actinobacteria_-_Verrucosispora_ma:0.58272,
(pac.g.HM855229.1_Actinobacteria_-_Streptomyces_coeruleorubidus_P:0.08796,
np.g.HQ287563.1_Actinobacteria_-_Streptomyces_sp._DSM_5940_Napsa:0.09389)
0.9990000000:0.52883)0.9620000000:0.29596,
SAV_3197_gb_NC_003155.4_Actinobacteria_-_Streptomyces_avermitili:0.4223)
0.0000000000:0.01687,
(SACE_4279_gb_NC_009142.1_Actinobacteria_-_Saccharopolyspora_eryt:0.56736,
pstA.g.AJ488769.3_Actinobacteria_-_Actinoplanes_friuliensis_Friu:0.40639)
0.8620000000:0.12588)0.8110000000:0.21494,
VAB18032_19000_gb_NC_015434.0_Actinobacteria_-_Verrucosispora_ma:0.97432)
1.0000000000:1.50456)0.5640000000:0.11077,(Q54.STRFR:0.30352,PAB.STRGR:0.27414)
0.8990000000:0.10262)0.8610000000:0.05956)0.7950000000:0.06672,(TE.MYCTU:0.57533,
((MT2.g.NC_002755.2_Actinobacteria_-_Mycobacterium_tuberculosis_CD:0.0,
Rv2.g.AL123456.2_Actinobacteria_-_Mycobacterium_tuberculosis_H37:0.0069)
0.0000000000:0.0,MB.MYCTU:0.0)1.0000000000:0.48040)0.3980000000:0.09207)
0.1560000000:0.21284)0.9800000000:0.72084,((((pcb.gb:0.0,P9.LYSLA:0.0)
1.0000000000:0.28113,((AC1.PENCH:0.09622,AC.EMENI:0.15198)0.9430000000:0.09486,
AC.CEPAC:0.29018)1.0000000000:0.21082)0.2230000000:0.10842,AC.NOCLA:0.14727)
1.0000000000:1.4289,
(((PSPTO_4687_gb_NC_004578.1_Proteobacteria_Gamma_-_Pseudomonas_syr:1.14312,
(((MT0.g.NC_002755.2_Actinobacteria_-_Mycobacterium_tuberculosis_CD:0.0,
Rv0.g.NC_000962.2_Actinobacteria_-_Mycobacterium_tuberculosis_H3:0.0)
1.0000000000:1.28776,((so.gb:0.77223,
(((Francci3_2981_gb_NC_007777.1_Actinobacteria_-_Frankia_sp._CcI3_T:0.63468,
ap.g.JF819834.1_Actinobacteria_-_Nocardiopsis_sp._FU40_Apoptolid:0.54776)
0.8080000000:0.13524,
(((SGR_6183_gb_NC_010572.1_Actinobacteria_-_Streptomyces_griseus_su:0.35208,
((SAV_943_gb_NC_003155.4_Actinobacteria_-_Streptomyces_avermitilis:0.0,
av.g.AB032367.1_Actinobacteria_-_Streptomyces_avermitilis_Averme:0.0)
0.9990000000:0.18148,
me.g.FJ952082.1_Actinobacteria_-_Streptomyces_nanchangensis_Meil:0.05641)
1.0000000000:0.4277)0.8650000000:0.07857,
(SAV_2895_gb_NC_003155.4_Actinobacteria_-_Streptomyces_avermitili:0.0,
ol.g.AB070940.1_Actinobacteria_-_Streptomyces_avermitilis_Oligom:0.0)
1.0000000000:0.72689)0.9040000000:0.089,
((((AEZ54379.1_gb_HQ840721.0_Actinobacteria_-_Streptomyces_piomogenu:0.29246,
au.g.AJ575648.0_Actinobacteria_-_Streptomyces_thioluteus_Aureoth:0.49376)
0.9820000000:0.21760,
(bo.g.AJ580915.1_Actinobacteria_-_Streptomyces_parvulus_Borrelidi:0.49801,
h.g.JN671974.1_Actinobacteria_-_Streptomyces_chromofuscus_Herbox:0.35143)
0.9640000000:0.12580)0.8780000000:0.08376,
((Ndas_0496_gb_NC_014210.1_Actinobacteria_-_Nocardiopsis_dassonvil:0.55665,
SVEN_0485_gb_FR845719.0_Actinobacteria_-_Streptomyces_venezuelae:0.42429)
0.9860000000:0.22021,
((fo.g.HQ434551.0_Actinobacteria_-_Streptomyces_pulveraceus_Fostri:0.28435,
plm.g.AY354515.1_Actinobacteria_-_Streptomyces_sp._HK803_Phoslac:0.32819)
1.0000000000:0.34749,
spn.g.AY007564.1_Actinobacteria_-_Saccharopolyspora_spinosa_Spin:0.49414)
0.8640000000:0.0969)0.7960000000:0.03763)0.8850000000:0.04517,
((pld.g.AB435553.1_Actinobacteria_-_Streptomyces_platensis_Pladien:0.47981,
(ADC79620.1_gb_GU390405.1_Actinobacteria_-_Streptomyces_lohii_Baf:0.21755,
AAZ94391.1_gb_DQ149987.0_Actinobacteria_-_Streptomyces_neyagawae:0.15556)
0.9980000000:0.2556)0.9140000000:0.09442,
(gf.g.AB469193.0_Actinobacteria_-_Streptomyces_graminofaciens_FD-:0.36059,
((SACE_4138_gb_NC_009142.1_Actinobacteria_-_Saccharopolyspora_eryt:0.0,
SACE_4138_gb_AM420293.0_Actinobacteria_-_Saccharopolyspora_eryth:0.0)
0.9990000000:0.41499,
(SGR_6785_gb_NC_010572.1_Actinobacteria_-_Streptomyces_griseus_su:0.01619,
AFO59866.1_gb_JX014302.0_Actinobacteria_-_Streptomyces_sp._YIM_5:0.04122)
1.0000000000:0.66699)0.8620000000:0.12925)0.8990000000:0.08503)
0.3130000000:0.05220)0.3420000000:0.05996)0.1640000000:0.0424)
0.2770000000:0.06148,
((SAV_415_gb_NC_003155.4_Actinobacteria_-_Streptomyces_avermitilis:0.54721,
((Sare_3151_gb_NC_009953.1_Actinobacteria_-_Salinispora_arenicola:0.60482,
si.g.AF324838.2_Actinobacteria_-_Streptomyces_antibioticus_Simoc:0.47206)
0.9890000000:0.35682,
spi.g.AM407731.1_Proteobacteria_Delta_-_Sorangium_cellulosum_Spi:0.78460)
0.1440000000:0.13155)0.6200000000:0.08335,
(tg.g.GQ981380.1_Proteobacteria_Delta_-_Sorangium_cellulosum_T1PK:0.21256,
tug.g.GQ981381.0_Proteobacteria_Delta_-_Chondromyces_crocatus_T1:0.21403)
1.0000000000:0.36699)0.5230000000:0.06107)0.7510000000:0.04608)
0.8810000000:0.07198,(O308.STRHY:0.93997,
((((chm.g.AY509120.1_Actinobacteria_-_Streptomyces_bikiniensis_Chalc:0.38163,
O33.STRFR:0.23798)0.4290000000:0.09090,
(ni.g.AF016585.0_Actinobacteria_-_Streptomyces_caelestis_Niddamyc:0.0,
O30768_9ACTO/1642-1856:0.0)1.0000000000:0.36913)0.9570000000:0.14344,
((((((DebsTE:0.0,
(SACE_0724_gb_NC_009142.0_Actinobacteria_-_Saccharopolyspora_eryt:0.0,
ER.SACER:0.0)0.0000000000:0.0)0.0000000000:0.0,
SACE_0724_gb_NC_009142.1_Actinobacteria_-_Saccharopolyspora_eryt:0.0)
1.0000000000:0.22115,
lk.g.AB088224.2_Actinobacteria_-_Streptomyces_rochei_Lankamycin:0.23016)
0.6950000000:0.07989,
er.g.AY623658.0_Actinobacteria_-_Aeromicrobium_erythreum_Erythro:0.3788)
0.6030000000:0.06272,OL.STRAT:0.30391)0.7500000000:0.14462,((PikTE:0.0,
pik.g.AF079138.1_Actinobacteria_-_Streptomyces_venezuelae_Methym:0.0)
1.0000000000:0.36573,
SAM.g.AM238664.2_Actinobacteria_-_Streptomyces_ambofaciens_ATCC:0.43700)
0.9940000000:0.24904)0.6380000000:0.05089)0.9350000000:0.13480,
pk2.g.FJ952082.1_Actinobacteria_-_Streptomyces_nanchangensis_Mei:0.81891)
0.8630000000:0.1015)0.9580000000:0.20833)0.5740000000:0.05617)
0.1320000000:0.04014,
((((pim.g.AJ278573.1_Actinobacteria_-_Streptomyces_natalensis_Pimari:0.2813,
fs.g.AY310323.0_Actinobacteria_-_Streptomyces_sp._FR-008_FR-008:0.15458)
0.5640000000:0.14049,
(amp.g.AF357202.1_Actinobacteria_-_Streptomyces_nodosus_Amphoteri:0.04468,
ny.g.AF263912.0_Actinobacteria_-_Streptomyces_noursei_ATCC_11455:0.05662)
0.9970000000:0.33225)0.9970000000:0.42645,
(be.g.FJ872523.0_Actinobacteria_-_Streptomyces_sp._DSM_21069_BE-1:0.07819,
ml.g.FJ872525.0_Actinobacteria_-_Streptomyces_sp._MP39-85_ML-449:0.03757)
0.9980000000:0.42849)0.9280000000:0.19872,((Ti.R.ester:0.3241,
vi.g.AB086653.1_Actinobacteria_-_Streptomyces_halstedii_Vicenist:0.36329)
0.3990000000:0.06405,
Strop_2778_gb_CP000667.1_Actinobacteria_-_Salinispora_tropica_CN:0.44420)
0.9510000000:0.18782)0.9530000000:0.2178)0.5640000000:0.10653)
0.7140000000:0.10234,
((ABI94380.1_gb_DQ983361.1_Actinobacteria_-_Streptomyces_sp._CK441:0.0,
ttn.g.EU035755.1_Actinobacteria_-_Streptomyces_griseochromogenes:0.0)
0.9800000000:0.27785,
ttm.g.EF990140.1_Actinobacteria_-_Streptomyces_spiroverticillatu:0.27379)
1.0000000000:0.66843)0.9990000000:0.86468,
((((((Sare_2407_gb_NC_009953.1_Actinobacteria_-_Salinispora_arenicola:0.28335,
SGR_814_gb_NC_010572.1_Actinobacteria_-_Streptomyces_griseus_sub:0.1818)
0.9940000000:0.51463,
(MAE_38550_gb_NC_010296.1_Cyanobacteria_-_Microcystis_aeruginosa:0.03636,
mc.g.AF183408.1_Cyanobacteria_-_Microcystis_aeruginosa_PCC_7806:0.00057)
1.0000000000:1.19913)0.7430000000:0.21625,((SurfactinTE:0.00830,
((BS0.g.NC_000964.3_Firmicutes_-_Bacillus_subtilis_subsp._subtilis:0.0,sr.gb:0.0)
0.0000000000:0.0,SRC.BACSU:0.0)0.6400000000:0.00678)0.9960000000:0.29727,
li.gb:0.41400)0.9870000000:0.33055)0.7310000000:0.07124,((FenTE:0.09036,
(BS18.g.NC_000964.3_Firmicutes_-_Bacillus_subtilis_subsp._subtili:0.0,
PP.BACSU:0.0)0.9700000000:0.1352)0.9990000000:0.48556,
((ty.g.AF004835.1_Firmicutes_-_Brevibacillus_brevis_Tyrocydine_NRP:0.0,
TY.BREPA:0.0)1.0000000000:0.34389,(gr.gb:0.0,GB.BREBE:0.0)0.9750000000:0.19485)
0.9960000000:0.3318)0.9340000000:0.18388)0.8660000000:0.24952,
((bm.g.AJ576102.1_Firmicutes_-_Bacillus_amyloliquefaciens_FZB42_Ba:0.0841,
it.g.AB050629.1_Firmicutes_-_Bacillus_subtilis_Iturin_TRANSATPKS:0.05050)
0.8530000000:0.05167,
my.g.AF184956.1_Firmicutes_-_Bacillus_subtilis_subsp._spizizenii:0.08513)
0.9780000000:0.61008)0.9960000000:1.04120,
(PA29.g.NC_002516.2_Proteobacteria_Gamma_-_Pseudomonas_aeruginosa:0.0,
Q51.PSEAI:0.0)0.9990000000:1.79653)0.3310000000:0.27674)0.5210000000:0.08058)
0.8290000000:0.1784)0.9040000000:0.23680)0.4840000000:0.03566):0.2742);
