# Supplementary material for: Polyketide synthase and non-ribosomal peptide synthetase thioesterase selectivity: logic gate or a victim of fate?
Source: Royal Society of Chemistry journal article supplement (doi:10.1039/c4np00148f), 2015-02-02
Supplement: c4np00148f6.xlsx [file c4np00148f6.xlsx]

## Sheet: Sheet1
	Lid Type	pdb			SA	Vol		SA/V
	Pore	1kez		186	1367.7	1965.2		0.69596
	Pore	1kez		185	1379	1778		0.775591
	Pore	1MO2		81	1315.9	2431.3		0.541233
	Pore	1MO2		80	1094.3	2161.3		0.506316
	Trough	3QIT		150	1871.9	3866.1		0.484183
	Trough	3QIT		149	1952.9	3431.3		0.569143
	Trough	3LCR		76	1469.1	1986.6		0.739505
	Trough	3LCR		75	1309.3	1653.9		0.791644
	Pore	1MNA		71	1671.6	2396.8		0.69743
	Pore	1MNA		70	1554.2	2533.1		0.613557
	Pore	1MNQ		82	1477.8	2215.7		0.666968
	Pore	1MNQ		81	1354.1	2196.9		0.616369
