# Supplementary material for: Polyketide synthase and non-ribosomal peptide synthetase thioesterase selectivity: logic gate or a victim of fate?
Source: Royal Society of Chemistry journal article supplement (doi:10.1039/c4np00148f), 2015-02-02
Supplement: c4np00148f7.xlsx [file c4np00148f7.xlsx]

## Sheet: Sheet1
Clustermine and genbank output title		Phylogeny output title	Module Types Contained	Module that the TE is connected to
mycC|gb|AF184956.1|_Firmicutes_-_Bacillus_subtilis_subsp._spizizenii_ATCC_6633_Mycosubtilin_TRANSATPKS-NRPS_Thioesterase		my.g.AF184956.1 Firmicutes - Bacillus subtilis subsp. spizizenii	TransATNRPS	NRPS
pedH|gb|AY328023.1|_Unknown_-_symbiont_bacterium_of_Paederus_fuscipes_Pederin_TRANSATPKS-NRPS_Thioesterase		ped.g.AY328023.1 Unknown - symbiont bacterium of Paederus fuscip	TransATNRPS	NRPS	Count
rhiF|gb|AM411073.1|_Proteobacteria_(Beta)_-_Burkholderia_rhizoxinica_Rhizoxin_TRANSATPKS-NRPS_Thioesterase		r.g.AM411073.1 Proteobacteria Beta - Burkholderia rhizoxinica Rh	TransATNRPS	TransAT	NRPS	167
baeR|gb|AJ634060.0|_Firmicutes_-_Bacillus_amyloliquefaciens_FZB42_Bacillaene_TRANSATPKS-NRPS_Thioesterase		bae.g.AJ634060.0 Firmicutes - Bacillus amyloliquefaciens FZB42 B	TransATNRPS	TransAT	T1	108
disC|gb|AJ874112.1|_Proteobacteria_(Delta)_-_Sorangium_cellulosum_Disorazole_TRANSATPKS-NRPS_Thioesterase		dis.g.AJ874112.1 Proteobacteria Delta - Sorangium cellulosum Dis	TransATNRPS	TransAT	TransAT	25
dszC|gb|DQ013294.0|_Proteobacteria_(Delta)_-_Sorangium_cellulosum_Disorazole_TRANSATPKS-NRPS_Thioesterase		ds.g.DQ013294.0 Proteobacteria Delta - Sorangium cellulosum Diso	TransATNRPS	TransAT
albIX|gb|AJ586576.1|_Proteobacteria_(Gamma)_-_Xanthomonas_albilineans_Albicidin_NRPS-TRANSATPKS_Thioesterase		alI.g.AJ586576.1 Proteobacteria Gamma - Xanthomonas albilineans	NRPSTransAT	NRPS
bmyC|gb|AJ576102.1|_Firmicutes_-_Bacillus_amyloliquefaciens_FZB42_Bacillomycin_NRPS-TRANSATPKS_Thioesterase		bm.g.AJ576102.1 Firmicutes - Bacillus amyloliquefaciens FZB42 Ba	NRPSTransAT	NRPS
ituC|gb|AB050629.1|_Firmicutes_-_Bacillus_subtilis_Iturin_TRANSATPKS-NRPS_Thioesterase		it.g.AB050629.1 Firmicutes - Bacillus subtilis Iturin TRANSATPKS	TransATNRPS	NRPS
lpg2179|gb|NC_002942.5|_Proteobacteria_(Gamma)_-_Legionella_pneumophila_subsp._pneumophila_str._Philadelphia_1_NRPS-T1PKS_Thioesterase		lp.g.NC 002942.5 Proteobacteria Gamma - Legionella pneumophila s	NRPST1	NRPS
PSPTO_2600|gb|NC_004578.1|_Proteobacteria_(Gamma)_-_Pseudomonas_syringae_pv._tomato_str._DC3000_NRPS-T1PKS_Thioesterase		PSPTO 2600 gb NC 004578.1 Proteobacteria Gamma - Pseudomonas syr	NRPST1	NRPS
MAP_3742|gb|AE016958.1|_Actinobacteria_-_Mycobacterium_avium_subsp._paratuberculosis_K-10_NRPS-T1PKS_Thioesterase		MAP 3742 gb AE016958.1 Actinobacteria - Mycobacterium avium subs	NRPST1	NRPS
Rv2383c|gb|AL123456.2|_Actinobacteria_-_Mycobacterium_tuberculosis_H37Rv_Mycobactin_NRPS-T1PKS_Thioesterase		Rv2.g.AL123456.2 Actinobacteria - Mycobacterium tuberculosis H37	NRPST1	NRPS
SACE_4279|gb|NC_009142.1|_Actinobacteria_-_Saccharopolyspora_erythraea_NRRL_2338_NRPS-T1PKS_Thioesterase		SACE 4279 gb NC 009142.1 Actinobacteria - Saccharopolyspora eryt	NRPST1	NRPS
SACE_4287|gb|NC_009142.1|_Actinobacteria_-_Saccharopolyspora_erythraea_NRRL_2338_NRPS-T1PKS_Thioesterase		SACE 4287 gb NC 009142.1 Actinobacteria - Saccharopolyspora eryt	NRPST1	NRPS
sce8255|gb|NC_010162.1|_Proteobacteria_(Delta)_-_Sorangium_cellulosum_So_ce_56_NRPS-T1PKS_Thioesterase		sc8.g.NC 010162.1 Proteobacteria Delta - Sorangium cellulosum So	NRPST1	NRPS
tubF|gb|GU002154.1|_Proteobacteria_(Delta)_-_Cystobacter_sp._SBCb004_Tubulysin_NRPS-T1PKS_Thioesterase		tub.g.GU002154.1 Proteobacteria Delta - Cystobacter sp. SBCb004	NRPST1	T1
MXAN_3618|gb|NC_008095.1|_Proteobacteria_(Delta)_-_Myxococcus_xanthus_DK_1622_NRPS-T1PKS_Thioesterase		MXAN 3618 gb NC 008095.1 Proteobacteria Delta - Myxococcus xanth	NRPST1	NRPS
MXAN_3636|gb|NC_008095.1|_Proteobacteria_(Delta)_-_Myxococcus_xanthus_DK_1622_NRPS-T1PKS_Thioesterase		MXAN 3636 gb NC 008095.1 Proteobacteria Delta - Myxococcus xanth	NRPST1	TransAT
MXAN_4000|gb|NC_008095.1|_Proteobacteria_(Delta)_-_Myxococcus_xanthus_DK_1622_NRPS-T1PKS_Thioesterase		MXAN 4000 gb NC 008095.1 Proteobacteria Delta - Myxococcus xanth	NRPST1	NRPS
depE|gb|EF210776.0|_Proteobacteria_(Beta)_-_Chromobacterium_violaceum_FK228_NRPS-T1PKS_Thioesterase		de.g.EF210776.0 Proteobacteria Beta - Chromobacterium violaceum	NRPST1	NRPS
MT2451|gb|NC_002755.2|_Actinobacteria_-_Mycobacterium_tuberculosis_CDC1551_NRPS-T1PKS_Thioesterase		MT2.g.NC 002755.2 Actinobacteria - Mycobacterium tuberculosis CD	NRPST1	NRPS
MAE_38550|gb|NC_010296.1|_Cyanobacteria_-_Microcystis_aeruginosa_NIES-843_NRPS-T1PKS_Thioesterase		MAE 38550 gb NC 010296.1 Cyanobacteria - Microcystis aeruginosa	NRPST1	NRPS
SAV_865|gb|NC_003155.4|_Actinobacteria_-_Streptomyces_avermitilis_MA-4680_NRPS-T1PKS_Thioesterase		SAV 865 gb NC 003155.4 Actinobacteria - Streptomyces avermitilis	NRPST1	NRPS
Sare_2072|gb|NC_009953.1|_Actinobacteria_-_Salinispora_arenicola_CNS-205_NRPS-T1PKS_Thioesterase		Sare 2072 gb NC 009953.1 Actinobacteria - Salinispora arenicola	NRPST1	NRPS
Npun_R3023|gb|NC_010628.1|_Cyanobacteria_-_Nostoc_punctiforme_PCC_73102_NRPS-T1PKS_Thioesterase		N.R30.gb NC 010628.1 Cyanobacteria - Nostoc punctiforme PCC 7310	NRPST1	NRPS
Npun_R6587|gb|NC_010628.1|_Cyanobacteria_-_Nostoc_punctiforme_PCC_73102_NRPS-T1PKS_Thioesterase		N.R6.gb NC 010628.1 Cyanobacteria - Nostoc punctiforme PCC 73102	NRPST1	NRPS
psm3B|gb|AB279593.1|_Cyanobacteria_-_Microcystis_aeruginosa_Micropeptin_NRPS-T1PKS_Thioesterase		psm.g.AB279593.1 Cyanobacteria - Microcystis aeruginosa Micropep	NRPST1	NRPS
Strop_2654|gb|NC_009380.1|_Actinobacteria_-_Salinispora_tropica_CNB-440_NRPS-T1PKS_Thioesterase		Strop 2654 gb NC 009380.1 Actinobacteria - Salinispora tropica C	NRPST1	NRPS
RHA1_ro02207|gb|NC_008268.1|_Actinobacteria_-_Rhodococcus_jostii_RHA1_NRPS-T1PKS_Thioesterase		RH.r22.gb NC 008268.1 Actinobacteria - Rhodococcus jostii RHA1 N	NRPST1	NRPS
YPO1910|gb|NC_003143.1|_Proteobacteria_(Gamma)_-_Yersinia_pestis_CO92_NRPS-T1PKS_Thioesterase		Y1.g.NC 003143.1 Proteobacteria Gamma - Yersinia pestis CO92 NRP	NRPST1	T1
PKS13|gb|DQ019316.1|_Eukaryota_(Fungi)_-_Gibberella_zeae_Zearalenone_NRPS-T1PKS_Thioesterase		PK3.g.DQ019316.1 Eukaryota Fungi - Gibberella zeae Zearalenone N	NRPST1	T1
CKL_1511|gb|NC_009706.1|_Firmicutes_-_Clostridium_kluyveri_DSM_555_NRPS-T1PKS_Thioesterase		CKL 1511 gb NC 009706.1 Firmicutes - Clostridium kluyveri DSM 55	NRPST1	NRPS
LYNGBM3L_57760|gb|GL890964.1|_Cyanobacteria_-_Moorea_producta_3L_NRPS-T1PKS_Thioesterase		LYNGBM3L 57760 gb GL890964.1 Cyanobacteria - Moorea producta 3L	NRPST1	NRPS
ROP_19210|gb|NC_012522.1|_Actinobacteria_-_Rhodococcus_opacus_B4_NRPS-T1PKS_Thioesterase		ROP 19210 gb NC 012522.1 Actinobacteria - Rhodococcus opacus B4	NRPST1	NRPS
barG|gb|AF516145.1|_Cyanobacteria_-_Lyngbya_majuscula_Barbamide_NRPS-T1PKS_Thioesterase		bar.g.AF516145.1 Cyanobacteria - Lyngbya majuscula Barbamide NRP	NRPST1	NRPS
PSPTO_4687|gb|NC_004578.1|_Proteobacteria_(Gamma)_-_Pseudomonas_syringae_pv._tomato_str._DC3000_Coronatine_T1PKS-NRPS_Thioesterase		PSPTO 4687 gb NC 004578.1 Proteobacteria Gamma - Pseudomonas syr	T1NRPS	T1
PSPTO_4699|gb|NC_004578.1|_Proteobacteria_(Gamma)_-_Pseudomonas_syringae_pv._tomato_str._DC3000_Coronatine_T1PKS-NRPS_Thioesterase		PSPTO 4699 gb NC 004578.1 Proteobacteria Gamma - Pseudomonas syr	T1NRPS	NRPS
mtaG|gb|AF188287.1|_Proteobacteria_(Delta)_-_Stigmatella_aurantiaca_DW4/3-1_Myxothiazol_T1PKS-NRPS_Thioesterase		mt.g.AF188287.1 Proteobacteria Delta - Stigmatella aurantiaca DW	T1NRPS	NRPS
SGR_814|gb|NC_010572.1|_Actinobacteria_-_Streptomyces_griseus_subsp._griseus_NBRC_13350_T1PKS-NRPS_Thioesterase		SGR 814 gb NC 010572.1 Actinobacteria - Streptomyces griseus sub	T1NRPS	NRPS
cndF|gb|AM988861.1|_Proteobacteria_(Delta)_-_Chondromyces_crocatus_Chondrochlorens_T1PKS-NRPS_Thioesterase		cn.g.AM988861.1 Proteobacteria Delta - Chondromyces crocatus Cho	T1NRPS	NRPS
irp1|gb|Y12527.1|_Proteobacteria_(Gamma)_-_Yersinia_enterocolitica_Yersiniabactin_T1PKS-NRPS_Thioesterase		ir.gb	T1NRPS	NRPS
mcyC|gb|AF183408.1|_Cyanobacteria_-_Microcystis_aeruginosa_PCC_7806_Microcystin_T1PKS-NRPS_Thioesterase		mc.g.AF183408.1 Cyanobacteria - Microcystis aeruginosa PCC 7806	T1NRPS	NRPS
RS05859|gb|NC_003296.1|_Proteobacteria_(Beta)_-_Ralstonia_solanacearum_GMI1000_T1PKS-NRPS_Thioesterase		RS05	T1NRPS	NRPS
RS05859|gb|NC_003296.1|_Proteobacteria_(Beta)_-_Ralstonia_solanacearum_GMI1000_T1PKS-NRPS_Thioesterase(2)		RS05.g.NC 003296.1 Proteobacteria Beta - Ralstonia solanacearum	T1NRPS	NRPS
RSc1811|gb|NC_003295.1|_Proteobacteria_(Beta)_-_Ralstonia_solanacearum_GMI1000_T1PKS-NRPS_Thioesterase		RSc.g.NC 003295.1 Proteobacteria Beta - Ralstonia solanacearum G	T1NRPS	NRPS
sce0345|gb|NC_010162.1|_Proteobacteria_(Delta)_-_Sorangium_cellulosum_So_ce_56_T1PKS-NRPS_Thioesterase		sc0.g.NC 010162.1 Proteobacteria Delta - Sorangium cellulosum So	T1NRPS	T1
sce6823|gb|NC_010162.1|_Proteobacteria_(Delta)_-_Sorangium_cellulosum_So_ce_56_T1PKS-NRPS_Thioesterase		sc6.g.NC 010162.1 Proteobacteria Delta - Sorangium cellulosum So	T1NRPS	T1
VAB18032_24915|gb|NC_015434.0|_Actinobacteria_-_Verrucosispora_maris_AB-18-032_T1PKS-NRPS_Thioesterase		VAB18032 24915 gb NC 015434.0 Actinobacteria - Verrucosispora ma	T1NRPS	NRPS
MXAN_3779|gb|NC_008095.1|_Proteobacteria_(Delta)_-_Myxococcus_xanthus_DK_1622_T1PKS-NRPS_Thioesterase		MXAN 3779 gb NC 008095.1 Proteobacteria Delta - Myxococcus xanth	T1NRPS	T1
MXAN_4079|gb|NC_008095.1|_Proteobacteria_(Delta)_-_Myxococcus_xanthus_DK_1622_T1PKS-NRPS_Thioesterase		MXAN 4079 gb NC 008095.1 Proteobacteria Delta - Myxococcus xanth	T1NRPS	NRPS
MXAN_4296|gb|NC_008095.1|_Proteobacteria_(Delta)_-_Myxococcus_xanthus_DK_1622_T1PKS-NRPS_Thioesterase		MXAN 4296 gb NC 008095.1 Proteobacteria Delta - Myxococcus xanth	T1NRPS	NRPS
epoE|gb|AF210843.1|_Proteobacteria_(Delta)_-_Sorangium_cellulosum_Epothilone_T1PKS-NRPS_Thioesterase		epE.g.AF210843.1 Proteobacteria Delta - Sorangium cellulosum Epo	T1NRPS	T1
epoF|gb|AF217189.1|_Proteobacteria_(Delta)_-_Sorangium_cellulosum_Epothilone_T1PKS-NRPS_Thioesterase		epF.g.AF217189.1 Proteobacteria Delta - Sorangium cellulosum Epo	T1NRPS	T1
pelF|gb|HE616533.1|_Proteobacteria_(Delta)_-_Sorangium_cellulosum_Pellasoren_T1PKS-NRPS_Thioesterase		pel.g.HE616533.1 Proteobacteria Delta - Sorangium cellulosum Pel	T1NRPS	T1
Sare_2407|gb|NC_009953.1|_Actinobacteria_-_Salinispora_arenicola_CNS-205_T1PKS-NRPS_Thioesterase		Sare 2407 gb NC 009953.1 Actinobacteria - Salinispora arenicola	T1NRPS	NRPS
Npun_F2184|gb|NC_010628.1|_Cyanobacteria_-_Nostoc_punctiforme_PCC_73102_T1PKS-NRPS_Thioesterase		N.F21.gb NC 010628.1 Cyanobacteria - Nostoc punctiforme PCC 7310	T1NRPS	NRPS
Npun_F3173|gb|NC_010628.1|_Cyanobacteria_-_Nostoc_punctiforme_PCC_73102_T1PKS-NRPS_Thioesterase		N.F3.gb NC 010628.1 Cyanobacteria - Nostoc punctiforme PCC 73102	T1NRPS	NRPS
Npun_R3425|gb|NC_010628.1|_Cyanobacteria_-_Nostoc_punctiforme_PCC_73102_T1PKS-NRPS_Thioesterase		N.R34.gb NC 010628.1 Cyanobacteria - Nostoc punctiforme PCC 7310	T1NRPS	T1
pimS4|gb|AJ278573.1|_Actinobacteria_-_Streptomyces_natalensis_Pimaricin_T1PKS-NRPS_Thioesterase		pim.g.AJ278573.1 Actinobacteria - Streptomyces natalensis Pimari	T1NRPS	T1
crpD|gb|EF159954.0|_Cyanobacteria_-_Nostoc_sp._ATCC_53789_Cryptophycin_T1PKS-NRPS_Thioesterase		cr.g.EF159954.0 Cyanobacteria - Nostoc sp. ATCC 53789 Cryptophyc	T1NRPS	NRPS
fscF|gb|AY310323.0|_Actinobacteria_-_Streptomyces_sp._FR-008_FR-008_T1PKS-NRPS_Thioesterase		fs.g.AY310323.0 Actinobacteria - Streptomyces sp. FR-008 FR-008	T1NRPS	T1
tugD|gb|GQ981381.0|_Proteobacteria_(Delta)_-_Chondromyces_crocatus_T1PKS-NRPS_Thioesterase		tug.g.GQ981381.0 Proteobacteria Delta - Chondromyces crocatus T1	T1NRPS	T1
tgaC|gb|GQ981380.1|_Proteobacteria_(Delta)_-_Sorangium_cellulosum_T1PKS-NRPS_Thioesterase		tg.g.GQ981380.1 Proteobacteria Delta - Sorangium cellulosum T1PK	T1NRPS	T1
zmaQ|gb|FJ430564.1|_Firmicutes_-_Bacillus_cereus_Zwittermicin_T1PKS-NRPS_Thioesterase		z.g.FJ430564.1 Firmicutes - Bacillus cereus Zwittermicin T1PKS-N	T1NRPS	NRPS
SGR_6777|gb|NC_010572.1|_Actinobacteria_-_Streptomyces_griseus_subsp._griseus_NBRC_13350_TRANSATPKS-NRPS-T1PKS_Thioesterase		SGR 6777 gb NC 010572.1 Actinobacteria - Streptomyces griseus su	TransATNRPST1	TransAT
SGR_6785|gb|NC_010572.1|_Actinobacteria_-_Streptomyces_griseus_subsp._griseus_NBRC_13350_TRANSATPKS-NRPS-T1PKS_Thioesterase		SGR 6785 gb NC 010572.1 Actinobacteria - Streptomyces griseus su	TransATNRPST1	TransAT
sce4133|gb|NC_010162.1|_Proteobacteria_(Delta)_-_Sorangium_cellulosum_So_ce_56_TRANSATPKS-NRPS-T1PKS_Thioesterase		sc4.g.NC 010162.1 Proteobacteria Delta - Sorangium cellulosum So	TransATNRPST1	TransAT
chiF|gb|DQ065771.0|_Proteobacteria_(Delta)_-_Sorangium_cellulosum_Chivosazol_T1PKS-TRANSATPKS-NRPS_Thioesterase		chi.g.DQ065771.0 Proteobacteria Delta - Sorangium cellulosum Chi	T1TransATNRPS	TransAT
simC1C|gb|AF324838.2|_Actinobacteria_-_Streptomyces_antibioticus_Simocyclinone_T1PKS-T2PKS-AMINOCOUMARIN-NRPS_Thioesterase		si.g.AF324838.2 Actinobacteria - Streptomyces antibioticus Simoc	T1T2NRPS	T1
AAS98787.1|gb|AY522504.1|_Cyanobacteria_-_Lyngbya_majuscula_Jamaicamide_T1PKS-T2PKS-NRPS_Thioesterase		AAS98787.1 gb AY522504.1 Cyanobacteria - Lyngbya majuscula Jamai	T1T2NRPS	T1
BTH_II1664|gb|CP000085.0|_Proteobacteria_(Beta)_-_Burkholderia_thailandensis_E264_Thailandamide_T1PKS-TRANSATPKS-T2PKS-NRPS_Thioesterase		BT.I.gb CP000085.0 Proteobacteria Beta - Burkholderia thailanden	T1TransATT2NRPS	T1
AFV96142.1|gb|JX477167.0|_Cyanobacteria_-_Cylindrospermum_licheniforme_UTEX_B_2014_Cylindrocyclophane_T1PKS-T2PKS-T3PKS_Thioesterase		AFV96142.1 gb JX477167.0 Cyanobacteria - Cylindrospermum licheni	T1T2T3	T1
mmpB|gb|AF318063.2|_Proteobacteria_(Gamma)_-_Pseudomonas_fluorescens_Mupirocin_TRANSATPKS-T2PKS-T1PKS_Thioesterase		mm.g.AF318063.2 Proteobacteria Gamma - Pseudomonas fluorescens M	TransATT2T1	TransAT
Cpin_5289|gb|NC_013132.1|_Bacteroidetes_-_Chitinophaga_pinensis_DSM_2588_Elansolid_TRANSATPKS-T1PKS-T2PKS_Thioesterase		Cpin 5289 gb NC 013132.1 Bacteroidetes - Chitinophaga pinensis D	TransATT1T2	TransAT
herD|gb|JN671974.1|_Actinobacteria_-_Streptomyces_chromofuscus_Herboxidiene_T1PKS-T3PKS_Thioesterase		h.g.JN671974.1 Actinobacteria - Streptomyces chromofuscus Herbox	T1T3	T1
SVEN_0485|gb|FR845719.0|_Actinobacteria_-_Streptomyces_venezuelae_ATCC_10712_T1PKS-NRPS-T3PKS_Thioesterase		SVEN 0485 gb FR845719.0 Actinobacteria - Streptomyces venezuelae	T1NRPST3	T1
SVEN_0517|gb|FR845719.0|_Actinobacteria_-_Streptomyces_venezuelae_ATCC_10712_T1PKS-NRPS-T3PKS_Thioesterase		SVEN 0517 gb FR845719.0 Actinobacteria - Streptomyces venezuelae	T1NRPST3	NRPS
ykris0001_35400|gb|NZ_ACCA01000001.1|_Proteobacteria_(Gamma)_-_Yersinia_kristensenii_ATCC_33638_TRANSATPKS-T1PKS_Thioesterase		ykris0001 35400 gb NZ ACCA01000001.1 Proteobacteria Gamma - Yers	TransATT1	T1
gll1941|gb|NC_005125.1|_Cyanobacteria_-_Gloeobacter_violaceus_PCC_7421_TRANSATPKS-T1PKS_Thioesterase		gl4.g.NC 005125.1 Cyanobacteria - Gloeobacter violaceus PCC 7421	TransATT1	TransAT
gll1954|gb|NC_005125.1|_Cyanobacteria_-_Gloeobacter_violaceus_PCC_7421_TRANSATPKS-T1PKS_Thioesterase		gl5.g.NC 005125.1 Cyanobacteria - Gloeobacter violaceus PCC 7421	TransATT1	T1
MXAN_3932|gb|CP000113.1|_Proteobacteria_(Delta)_-_Myxococcus_xanthus_DK_1622_Antibiotic_TA_TRANSATPKS-NRPS-T2PKS_Thioesterase		MXAN 3932 gb CP000113.1 Proteobacteria Delta - Myxococcus xanthu	TransATNRPST2	TransAT
BSU17220|gb|AL009126.3|_Firmicutes_-_Bacillus_subtilis_subsp._subtilis_str._168_Bacillaene_T2PKS-TRANSATPKS-NRPS_Thioesterase		BS17.g.AL009126.3 Firmicutes - Bacillus subtilis subsp. subtilis	T2TransATNRPS	TransAT
ADA82585.1|gb|FJ823461.1|_Unknown_-_uncultured_bacterium_psy1_Psymberin_TRANSATPKS-NRPS-T2PKS_Thioesterase		ADA82585.1 gb FJ823461.1 Unknown - uncultured bacterium psy1 Psy	TransATNRPST2	TransAT
BSU17220|gb|NC_000964.3|_Firmicutes_-_Bacillus_subtilis_subsp._subtilis_str._168_T2PKS-TRANSATPKS-NRPS_Thioesterase		BS17.g.NC 000964.3 Firmicutes - Bacillus subtilis subsp. subtili	T2TransATNRPS	TransAT
ABK51302.1|gb|EF032014.0|_Proteobacteria_(Gamma)_-_Candidatus_Endobugula_sertula_Bryostatin_T2PKS-TRANSATPKS_Thioesterase		ABK51302.1 gb EF032014.0 Proteobacteria Gamma - Candidatus Endob	T2TransAT	TransAT
sce3193|gb|NC_010162.1|_Proteobacteria_(Delta)_-_Sorangium_cellulosum_So_ce_56_T2PKS-TRANSATPKS_Thioesterase		sc3.g.NC 010162.1 Proteobacteria Delta - Sorangium cellulosum So	T2TransAT	TransAT
oocS|gb|JX315603.1|_Proteobacteria_(Gamma)_-_Serratia_marcescens_Oocydin_T2PKS-TRANSATPKS_Thioesterase		oo.g.JX315603.1 Proteobacteria Gamma - Serratia marcescens Oocyd	T2TransAT	TransAT
oocS|gb|JX315604.1|_Proteobacteria_(Gamma)_-_Serratia_plymuthica_Oocydin_T2PKS-TRANSATPKS_Thioesterase		oo.g.JX315604.1 Proteobacteria Gamma - Serratia plymuthica Oocyd	T2TransAT	TransAT
elaR|gb|HQ680975.0|_Bacteroidetes_-_Chitinophaga_sancti_Elansolid_T2PKS-TRANSATPKS_Thioesterase		el.g.HQ680975.0 Bacteroidetes - Chitinophaga sancti Elansolid T2	T2TransAT	TransAT
Ndas_1741|gb|NC_014210.1|_Actinobacteria_-_Nocardiopsis_dassonvillei_subsp._dassonvillei_DSM_43111_T3PKS-NRPS_Thioesterase		Ndas 1741 gb NC 014210.1 Actinobacteria - Nocardiopsis dassonvil	T3NRPS	NRPS
Ndas_1761|gb|NC_014210.1|_Actinobacteria_-_Nocardiopsis_dassonvillei_subsp._dassonvillei_DSM_43111_T3PKS-NRPS_Thioesterase		Ndas 1761 gb NC 014210.1 Actinobacteria - Nocardiopsis dassonvil	T3NRPS	NRPS
vcm4|gb|HQ679900.1|_Actinobacteria_-_Amycolatopsis_orientalis_HCCB10007_Vancomycin_NRPS-T3PKS_Thioesterase		vc.g.HQ679900.1 Actinobacteria - Amycolatopsis orientalis HCCB10	NRPST3	NRPS
bpsC|gb|Y16952.3|_Actinobacteria_-_Amycolatopsis_balhimycina_DSM_5908_Balhimycin_NRPS-T3PKS_Thioesterase		bp.gb	NRPST3	NRPS
AAM80536.1|gb|U82965.2|_Actinobacteria_-_Streptomyces_toyocaensis_Teicoplanin_NRPS-T3PKS_Thioesterase		AAM80536.1 gb U82965.2 Actinobacteria - Streptomyces toyocaensis	NRPST3	NRPS
dbv16|gb|AJ561198.1|_Actinobacteria_-_Nonomuraea_sp._ATCC_39727_A40926_NRPS-T3PKS_Thioesterase		db.g.AJ561198.1 Actinobacteria - Nonomuraea sp. ATCC 39727 A4092	NRPST3	NRPS
SCO7683|gb|NC_003888.3|_Actinobacteria_-_Streptomyces_coelicolor_A3(2)_T3PKS-NRPS_Thioesterase		SC7.g.NC 003888.3 Actinobacteria - Streptomyces coelicolor A3 2	T3NRPS	NRPS
Francci3_2459|gb|NC_007777.1|_Actinobacteria_-_Frankia_sp._CcI3_NRPS-T3PKS_Thioesterase		Francci3 2459 gb NC 007777.1 Actinobacteria - Frankia sp. CcI3 N	NRPST3	NRPS
ADK54821.1|gb|GQ475282.1|_Unknown_-_uncultured_soil_bacterium_T3PKS-NRPS_Thioesterase		ADK54821.1 gb GQ475282.1 Unknown - uncultured soil bacterium T3P	T3NRPS	NRPS
ACY01392.1|gb|GQ274953.0|_Actinobacteria_-_Streptomyces_platensis_subsp._rosaceus_Iso-migrastatin_TRANSATPKS_Thioesterase		ACY01392.1 gb GQ274953.0 Actinobacteria - Streptomyces platensis	TransAT	TransAT
ACY01402.1|gb|GQ274954.0|_Actinobacteria_-_Streptomyces_amphibiosporus_Lactimidomycin_TRANSATPKS_Thioesterase		ACY01402.1 gb GQ274954.0 Actinobacteria - Streptomyces amphibios	TransAT	TransAT
AFO59866.1|gb|JX014302.0|_Actinobacteria_-_Streptomyces_sp._YIM_56141_Cycloheximide_TRANSATPKS_Thioesterase		AFO59866.1 gb JX014302.0 Actinobacteria - Streptomyces sp. YIM 5	TransAT	TransAT
difL|gb|AJ634062.2|_Firmicutes_-_Bacillus_amyloliquefaciens_FZB42_Difficidin_TRANSATPKS_Thioesterase		dif.g.AJ634062.2 Firmicutes - Bacillus amyloliquefaciens FZB42 D	TransAT	TransAT
STY0631|gb|NC_003198.1|_Proteobacteria_(Gamma)_-_Salmonella_enterica_subsp._enterica_serovar_Typhi_str._CT18_NRPS_Thioesterase		ST.g.NC 003198.1 Proteobacteria Gamma - Salmonella enterica subs	NRPS	NRPS
Ndas_1030|gb|NC_014210.1|_Actinobacteria_-_Nocardiopsis_dassonvillei_subsp._dassonvillei_DSM_43111_NRPS_Thioesterase		Ndas 1030 gb NC 014210.1 Actinobacteria - Nocardiopsis dassonvil	NRPS	NRPS
PSPTO_2830|gb|NC_004578.1|_Proteobacteria_(Gamma)_-_Pseudomonas_syringae_pv._tomato_str._DC3000_NRPS_Thioesterase		PS28	NRPS	NRPS
PSPTO_2150|gb|NC_004578.1|_Proteobacteria_(Gamma)_-_Pseudomonas_syringae_pv._tomato_str._DC3000_NRPS_Thioesterase		PSPTO 2150 gb NC 004578.1 Proteobacteria Gamma - Pseudomonas syr	NRPS	NRPS
PSPTO_2830|gb|NC_004578.1|_Proteobacteria_(Gamma)_-_Pseudomonas_syringae_pv._tomato_str._DC3000_NRPS_Thioesterase(2)		PSPTO 2830 gb NC 004578.1 Proteobacteria Gamma - Pseudomonas syr	NRPS	NRPS
PSPTO_4519|gb|NC_004578.1|_Proteobacteria_(Gamma)_-_Pseudomonas_syringae_pv._tomato_str._DC3000_NRPS_Thioesterase		PSPTO 4519 gb NC 004578.1 Proteobacteria Gamma - Pseudomonas syr	NRPS	NRPS
syrE|gb|AF047828.1|_Proteobacteria_(Gamma)_-_Pseudomonas_syringae_pv._syringae_Syringomycin_NRPS_Thioesterase		sy.g.AF047828.1 Proteobacteria Gamma - Pseudomonas syringae pv.	NRPS	NRPS
SVEN_6264|gb|NC_018750.1|_Actinobacteria_-_Streptomyces_venezuelae_ATCC_10712_Tetracycline_NRPS_Thioesterase		SVEN 6264 gb NC 018750.1 Actinobacteria - Streptomyces venezuela	NRPS	NRPS
MAP_1420|gb|AE016958.1|_Actinobacteria_-_Mycobacterium_avium_subsp._paratuberculosis_K-10_NRPS_Thioesterase		MAP 1420 gb AE016958.1 Actinobacteria - Mycobacterium avium subs	NRPS	NRPS
ABBFA_003403|gb|NC_011595.1|_Proteobacteria_(Gamma)_-_Acinetobacter_baumannii_AB307-0294_NRPS_Thioesterase		ABBFA 003403 gb NC 011595.1 Proteobacteria Gamma - Acinetobacter	NRPS	NRPS
b0586|gb|NC_000913.2|_Proteobacteria_(Gamma)_-_Escherichia_coli_str._K-12_substr._MG1655_NRPS_Thioesterase		b0.g.NC 000913.2 Proteobacteria Gamma - Escherichia coli str. K-	NRPS	NRPS
SGR_3264|gb|NC_010572.1|_Actinobacteria_-_Streptomyces_griseus_subsp._griseus_NBRC_13350_NRPS_Thioesterase		SGR 3264 gb NC 010572.1 Actinobacteria - Streptomyces griseus su	NRPS	NRPS
SGR_6739|gb|NC_010572.1|_Actinobacteria_-_Streptomyces_griseus_subsp._griseus_NBRC_13350_NRPS_Thioesterase		SGR 6739 gb NC 010572.1 Actinobacteria - Streptomyces griseus su	NRPS	NRPS
massC|gb|EU199081.2|_Proteobacteria_(Gamma)_-_Pseudomonas_fluorescens_SS101_Massetolide_NRPS_Thioesterase		ma.g.EU199081.2 Proteobacteria Gamma - Pseudomonas fluorescens S	NRPS	NRPS
massC|gb|EU199081.2|_Proteobacteria_(Gamma)_-_Pseudomonas_fluorescens_SS101_Massetolide_NRPS_Thioesterase(2)		ma 2	NRPS	NRPS
SGR_653|gb|NC_010572.1|_Actinobacteria_-_Streptomyces_griseus_subsp._griseus_NBRC_13350_NRPS_Thioesterase		SGR 653 gb NC 010572.1 Actinobacteria - Streptomyces griseus sub	NRPS	NRPS
PA2399|gb|NC_002516.2|_Proteobacteria_(Gamma)_-_Pseudomonas_aeruginosa_PAO1_Pyoverdin_NRPS_Thioesterase		PA29.g.NC 002516.2 Proteobacteria Gamma - Pseudomonas aeruginosa	NRPS	NRPS
RGBS107_02943|gb|DS544878.1|_Proteobacteria_(Alpha)_-_Phaeobacter_gallaeciensis_BS107_NRPS_Thioesterase		RGBS107 02943 gb DS544878.1 Proteobacteria Alpha - Phaeobacter g	NRPS	NRPS
dptD|gb|AY787762.1|_Actinobacteria_-_Streptomyces_roseosporus_NRRL_11379_Daptomycin_NRPS_Thioesterase		dp.g.AY787762.1 Actinobacteria - Streptomyces roseosporus NRRL 1	NRPS	NRPS
METDI5676|gb|NC_012988.1|_Proteobacteria_(Alpha)_-_Methylobacterium_extorquens_DM4_NRPS_Thioesterase		ME.g.NC 012988.1 Proteobacteria Alpha - Methylobacterium extorqu	NRPS	NRPS
pchF|gb|AF074705.2|_Proteobacteria_(Gamma)_-_Pseudomonas_aeruginosa_PAO1_Pyochelin_NRPS_Thioesterase		pch.g.AF074705.2 Proteobacteria Gamma - Pseudomonas aeruginosa P	NRPS	NRPS
snbDE|gb|FN563143.1|_Actinobacteria_-_Streptomyces_pristinaespiralis_Pristinamycin_NRPS_Thioesterase		snb.g.FN563143.1 Actinobacteria - Streptomyces pristinaespiralis	NRPS	NRPS
AB57_0157|gb|NC_011586.1|_Proteobacteria_(Gamma)_-_Acinetobacter_baumannii_AB0057_NRPS_Thioesterase		AB57 0157 gb NC 011586.1 Proteobacteria Gamma - Acinetobacter ba	NRPS	NRPS
snaD|gb|FN563144.1|_Actinobacteria_-_Streptomyces_pristinaespiralis_Pristinamycin_NRPS_Thioesterase		sna.g.FN563144.1 Actinobacteria - Streptomyces pristinaespiralis	NRPS	NRPS
BSU03510|gb|NC_000964.3|_Firmicutes_-_Bacillus_subtilis_subsp._subtilis_str._168_NRPS_Thioesterase		BS0.g.NC 000964.3 Firmicutes - Bacillus subtilis subsp. subtilis	NRPS	NRPS
BSU18300|gb|NC_000964.3|_Firmicutes_-_Bacillus_subtilis_subsp._subtilis_str._168_NRPS_Thioesterase		BS18.g.NC 000964.3 Firmicutes - Bacillus subtilis subsp. subtili	NRPS	NRPS
BSU31960|gb|NC_000964.3|_Firmicutes_-_Bacillus_subtilis_subsp._subtilis_str._168_NRPS_Thioesterase		BS3.g.NC 000964.3 Firmicutes - Bacillus subtilis subsp. subtilis	NRPS	NRPS
MSMEG_0019|gb|NC_008596.1|_Actinobacteria_-_Mycobacterium_smegmatis_str._MC2_155_NRPS_Thioesterase		MSMEG 0019 gb NC 008596.1 Actinobacteria - Mycobacterium smegmat	NRPS	NRPS
SACE_2696|gb|NC_009142.1|_Actinobacteria_-_Saccharopolyspora_erythraea_NRRL_2338_NRPS_Thioesterase		SACE 2696 gb NC 009142.1 Actinobacteria - Saccharopolyspora eryt	NRPS	NRPS
TMO_0595|gb|NC_017956.1|_Proteobacteria_(Alpha)_-_Tistrella_mobilis_KA081020-065_NRPS_Thioesterase		TMO 0595 gb NC 017956.1 Proteobacteria Alpha - Tistrella mobilis	NRPS	NRPS
AAK81827.1|gb|AF386507.1|_Actinobacteria_-_Streptomyces_lavendulae_Complestatin_NRPS_Thioesterase		AAK81827.1 gb AF386507.1 Actinobacteria - Streptomyces lavendula	NRPS	NRPS
MSMEG_0019|gb|CP000480.1|_Actinobacteria_-_Mycobacterium_smegmatis_str._MC2_155_NRPS_Thioesterase		MSMEG 0019 gb CP000480.1 Actinobacteria - Mycobacterium smegmati	NRPS	NRPS
ABAYE3754|gb|NC_010410.1|_Proteobacteria_(Gamma)_-_Acinetobacter_baumannii_AYE_NRPS_Thioesterase		A.g.NC 010410.1 Proteobacteria Gamma - Acinetobacter baumannii A	NRPS	NRPS
pchF|gb|EU088199.1|_Proteobacteria_(Gamma)_-_Pseudomonas_fluorescens_Pyochelin_NRPS_Thioesterase		pch.g.EU088199.1 Proteobacteria Gamma - Pseudomonas fluorescens	NRPS	NRPS
RS03120|gb|NC_003296.1|_Proteobacteria_(Beta)_-_Ralstonia_solanacearum_GMI1000_NRPS_Thioesterase		RS030.g.NC 003296.1 Proteobacteria Beta - Ralstonia solanacearum	NRPS	NRPS
RS03122|gb|NC_003296.1|_Proteobacteria_(Beta)_-_Ralstonia_solanacearum_GMI1000_NRPS_Thioesterase		RS032.g.NC 003296.1 Proteobacteria Beta - Ralstonia solanacearum	NRPS	NRPS
sce2387|gb|NC_010162.1|_Proteobacteria_(Delta)_-_Sorangium_cellulosum_So_ce_56_NRPS_Thioesterase		sc2.g.NC 010162.1 Proteobacteria Delta - Sorangium cellulosum So	NRPS	NRPS
tcp12|gb|AJ605139.1|_Actinobacteria_-_Actinoplanes_teichomyceticus_Teicoplanin_NRPS_Thioesterase		tc.g.AJ605139.1 Actinobacteria - Actinoplanes teichomyceticus Te	NRPS	NRPS
VAB18032_07080|gb|NC_015434.0|_Actinobacteria_-_Verrucosispora_maris_AB-18-032_NRPS_Thioesterase		VAB18032 07080 gb NC 015434.0 Actinobacteria - Verrucosispora ma	NRPS	NRPS
VAB18032_19000|gb|NC_015434.0|_Actinobacteria_-_Verrucosispora_maris_AB-18-032_NRPS_Thioesterase		VAB18032 19000 gb NC 015434.0 Actinobacteria - Verrucosispora ma	NRPS	NRPS
VAB18032_22195|gb|NC_015434.0|_Actinobacteria_-_Verrucosispora_maris_AB-18-032_NRPS_Thioesterase		VAB18032 22195 gb NC 015434.0 Actinobacteria - Verrucosispora ma	NRPS	NRPS
VAB18032_22305|gb|NC_015434.0|_Actinobacteria_-_Verrucosispora_maris_AB-18-032_NRPS_Thioesterase		VAB18032 22305 gb NC 015434.0 Actinobacteria - Verrucosispora ma	NRPS	NRPS
ABO_1784|gb|NC_008260.1|_Proteobacteria_(Gamma)_-_Alcanivorax_borkumensis_SK2_NRPS_Thioesterase		ABO 1784 gb NC 008260.1 Proteobacteria Gamma - Alcanivorax borku	NRPS	NRPS
ABO_2092|gb|NC_008260.1|_Proteobacteria_(Gamma)_-_Alcanivorax_borkumensis_SK2_NRPS_Thioesterase		ABO 2092 gb NC 008260.1 Proteobacteria Gamma - Alcanivorax borku	NRPS	NRPS
MXAN_1607|gb|NC_008095.1|_Proteobacteria_(Delta)_-_Myxococcus_xanthus_DK_1622_NRPS_Thioesterase		MXAN 1607 gb NC 008095.1 Proteobacteria Delta - Myxococcus xanth	NRPS	NRPS
pacP|gb|HM855229.1|_Actinobacteria_-_Streptomyces_coeruleorubidus_Pacidamycin_NRPS_Thioesterase		pac.g.HM855229.1 Actinobacteria - Streptomyces coeruleorubidus P	NRPS	NRPS
teiD|gb|AJ632270.1|_Actinobacteria_-_Actinoplanes_teichomyceticus_Teicoplanin_NRPS_Thioesterase		tei.g.AJ632270.1 Actinobacteria - Actinoplanes teichomyceticus T	NRPS	NRPS
SVEN_6202|gb|FR845719.0|_Actinobacteria_-_Streptomyces_venezuelae_ATCC_10712_NRPS_Thioesterase		SVEN 6202 gb FR845719.0 Actinobacteria - Streptomyces venezuelae	NRPS	NRPS
SVEN_7440|gb|FR845719.0|_Actinobacteria_-_Streptomyces_venezuelae_ATCC_10712_NRPS_Thioesterase		SVEN 7440 gb FR845719.0 Actinobacteria - Streptomyces venezuelae	NRPS	NRPS
Tcur_1888|gb|NC_013510.1|_Actinobacteria_-_Thermomonospora_curvata_DSM_43183_NRPS_Thioesterase		Tcur 1888 gb NC 013510.1 Actinobacteria - Thermomonospora curvat	NRPS	NRPS
PA2302|gb|NC_002516.2|_Proteobacteria_(Gamma)_-_Pseudomonas_aeruginosa_PAO1_NRPS_Thioesterase		PA20.g.NC 002516.2 Proteobacteria Gamma - Pseudomonas aeruginosa	NRPS	NRPS
PA3327|gb|NC_002516.2|_Proteobacteria_(Gamma)_-_Pseudomonas_aeruginosa_PAO1_NRPS_Thioesterase		PA3.g.NC 002516.2 Proteobacteria Gamma - Pseudomonas aeruginosa	NRPS	NRPS
PA4225|gb|NC_002516.2|_Proteobacteria_(Gamma)_-_Pseudomonas_aeruginosa_PAO1_NRPS_Thioesterase		PA4.g.NC 002516.2 Proteobacteria Gamma - Pseudomonas aeruginosa	NRPS	NRPS
Dtox_2674|gb|CP001720.0|_Firmicutes_-_Desulfotomaculum_acetoxidans_DSM_771_NRPS_Thioesterase		Dtox 2674 gb CP001720.0 Firmicutes - Desulfotomaculum acetoxidan	NRPS	NRPS
endC|gb|DQ403252.1|_Actinobacteria_-_Streptomyces_fungicidicus_Enduracidin_NRPS_Thioesterase		en.g.DQ403252.1 Actinobacteria - Streptomyces fungicidicus Endur	NRPS	NRPS
endC|gb|DQ403252.1|_Actinobacteria_-_Streptomyces_fungicidicus_Enduracidin_NRPS_Thioesterase(2)		en 2	NRPS	NRPS
npsP5|gb|HQ287563.1|_Actinobacteria_-_Streptomyces_sp._DSM_5940_Napsamycin_NRPS_Thioesterase		np.g.HQ287563.1 Actinobacteria - Streptomyces sp. DSM 5940 Napsa	NRPS	NRPS
SAV_3197|gb|NC_003155.4|_Actinobacteria_-_Streptomyces_avermitilis_MA-4680_NRPS_Thioesterase		SAV 3197 gb NC 003155.4 Actinobacteria - Streptomyces avermitili	NRPS	NRPS
vlm2|gb|DQ174261.1|_Actinobacteria_-_Streptomyces_tsusimaensis_Valinomycin_NRPS_Thioesterase		vl.g.DQ174261.1 Actinobacteria - Streptomyces tsusimaensis Valin	NRPS	NRPS
MAE_60000|gb|NC_010296.1|_Cyanobacteria_-_Microcystis_aeruginosa_NIES-843_NRPS_Thioesterase		MAE 60000 gb NC 010296.1 Cyanobacteria - Microcystis aeruginosa	NRPS	NRPS
pstA|gb|AJ488769.3|_Actinobacteria_-_Actinoplanes_friuliensis_Friulimicin_NRPS_Thioesterase		pstA.g.AJ488769.3 Actinobacteria - Actinoplanes friuliensis Friu	NRPS	NRPS
pstD|gb|AJ488769.3|_Actinobacteria_-_Actinoplanes_friuliensis_Friulimicin_NRPS_Thioesterase		pstD.g.AJ488769.3 Actinobacteria - Actinoplanes friuliensis Friu	NRPS	NRPS
Sare_0362|gb|NC_009953.1|_Actinobacteria_-_Salinispora_arenicola_CNS-205_NRPS_Thioesterase		Sare 0362 gb NC 009953.1 Actinobacteria - Salinispora arenicola	NRPS	NRPS
Sare_2962|gb|NC_009953.1|_Actinobacteria_-_Salinispora_arenicola_CNS-205_NRPS_Thioesterase		Sare 2962 gb NC 009953.1 Actinobacteria - Salinispora arenicola	NRPS	NRPS
Sare_4562|gb|NC_009953.1|_Actinobacteria_-_Salinispora_arenicola_CNS-205_NRPS_Thioesterase		Sare 4562 gb NC 009953.1 Actinobacteria - Salinispora arenicola	NRPS	NRPS
Npun_F2463|gb|NC_010628.1|_Cyanobacteria_-_Nostoc_punctiforme_PCC_73102_NRPS_Thioesterase		N.F24.gb NC 010628.1 Cyanobacteria - Nostoc punctiforme PCC 7310	NRPS	NRPS
Strop_0688|gb|NC_009380.1|_Actinobacteria_-_Salinispora_tropica_CNB-440_NRPS_Thioesterase		Strop 0688 gb NC 009380.1 Actinobacteria - Salinispora tropica C	NRPS	NRPS
acmC|gb|HM038106.1|_Actinobacteria_-_Streptomyces_anulatus_Actinomycin_NRPS_Thioesterase		ac.g.HM038106.1 Actinobacteria - Streptomyces anulatus Actinomyc	NRPS	NRPS
nfa11050|gb|NC_006361.1|_Actinobacteria_-_Nocardia_farcinica_IFM_10152_NRPS_Thioesterase		nf11.g.NC 006361.1 Actinobacteria - Nocardia farcinica IFM 10152	NRPS	NRPS
nfa27950|gb|NC_006361.1|_Actinobacteria_-_Nocardia_farcinica_IFM_10152_NRPS_Thioesterase		nf2.g.NC 006361.1 Actinobacteria - Nocardia farcinica IFM 10152	NRPS	NRPS
nfa31170|gb|NC_006361.1|_Actinobacteria_-_Nocardia_farcinica_IFM_10152_NRPS_Thioesterase		nf3.g.NC 006361.1 Actinobacteria - Nocardia farcinica IFM 10152	NRPS	NRPS
nfa50620|gb|NC_006361.1|_Actinobacteria_-_Nocardia_farcinica_IFM_10152_NRPS_Thioesterase		nf5.g.NC 006361.1 Actinobacteria - Nocardia farcinica IFM 10152	NRPS	NRPS
pcbAB|gb|D50308.1|_Proteobacteria_(Gamma)_-_Lysobacter_lactamgenus_ACV_NRPS_Thioesterase		pcb.gb	NRPS	NRPS
SCO3232|gb|NC_003888.3|_Actinobacteria_-_Streptomyces_coelicolor_A3(2)_NRPS_Thioesterase		SC3.g.NC 003888.3 Actinobacteria - Streptomyces coelicolor A3 2	NRPS	NRPS
SCO6432|gb|NC_003888.3|_Actinobacteria_-_Streptomyces_coelicolor_A3(2)_NRPS_Thioesterase		SC6.g.NC 003888.3 Actinobacteria - Streptomyces coelicolor A3 2	NRPS	NRPS
nfa7180|gb|NC_006361.1|_Actinobacteria_-_Nocardia_farcinica_IFM_10152_NRPS_Thioesterase		nf718.g.NC 006361.1 Actinobacteria - Nocardia farcinica IFM 1015	NRPS	NRPS
nfa7190|gb|NC_006361.1|_Actinobacteria_-_Nocardia_farcinica_IFM_10152_NRPS_Thioesterase		nf719.g.NC 006361.1 Actinobacteria - Nocardia farcinica IFM 1015	NRPS	NRPS
nfa7200|gb|NC_006361.1|_Actinobacteria_-_Nocardia_farcinica_IFM_10152_NRPS_Thioesterase		nf72.g.NC 006361.1 Actinobacteria - Nocardia farcinica IFM 10152	NRPS	NRPS
RHA1_ro00141|gb|NC_008268.1|_Actinobacteria_-_Rhodococcus_jostii_RHA1_NRPS_Thioesterase		RH.r011.gb NC 008268.1 Actinobacteria - Rhodococcus jostii RHA1	NRPS	NRPS
RHA1_ro00144|gb|NC_008268.1|_Actinobacteria_-_Rhodococcus_jostii_RHA1_NRPS_Thioesterase		RH.r014.gb NC 008268.1 Actinobacteria - Rhodococcus jostii RHA1	NRPS	NRPS
RHA1_ro00232|gb|NC_008268.1|_Actinobacteria_-_Rhodococcus_jostii_RHA1_NRPS_Thioesterase		RH.r02.gb NC 008268.1 Actinobacteria - Rhodococcus jostii RHA1 N	NRPS	NRPS
RHA1_ro00433|gb|NC_008268.1|_Actinobacteria_-_Rhodococcus_jostii_RHA1_NRPS_Thioesterase		RH.r04.gb NC 008268.1 Actinobacteria - Rhodococcus jostii RHA1 N	NRPS	NRPS
RHA1_ro02319|gb|NC_008268.1|_Actinobacteria_-_Rhodococcus_jostii_RHA1_NRPS_Thioesterase		RH.r231.gb NC 008268.1 Actinobacteria - Rhodococcus jostii RHA1	NRPS	NRPS
RHA1_ro02397|gb|NC_008268.1|_Actinobacteria_-_Rhodococcus_jostii_RHA1_NRPS_Thioesterase		RH.r239.gb NC 008268.1 Actinobacteria - Rhodococcus jostii RHA1	NRPS	NRPS
RHA1_ro05102|gb|NC_008268.1|_Actinobacteria_-_Rhodococcus_jostii_RHA1_NRPS_Thioesterase		RH.r512.gb NC 008268.1 Actinobacteria - Rhodococcus jostii RHA1	NRPS	NRPS
RHA1_ro05103|gb|NC_008268.1|_Actinobacteria_-_Rhodococcus_jostii_RHA1_NRPS_Thioesterase		RH.r513.gb NC 008268.1 Actinobacteria - Rhodococcus jostii RHA1	NRPS	NRPS
RHA1_ro05452|gb|NC_008268.1|_Actinobacteria_-_Rhodococcus_jostii_RHA1_NRPS_Thioesterase		RH.r545.gb NC 008268.1 Actinobacteria - Rhodococcus jostii RHA1	NRPS	NRPS
RHA1_ro05468|gb|NC_008268.1|_Actinobacteria_-_Rhodococcus_jostii_RHA1_NRPS_Thioesterase		RH.r546.gb NC 008268.1 Actinobacteria - Rhodococcus jostii RHA1	NRPS	NRPS
RHA1_ro06664|gb|NC_008268.1|_Actinobacteria_-_Rhodococcus_jostii_RHA1_NRPS_Thioesterase		RH.r6.gb NC 008268.1 Actinobacteria - Rhodococcus jostii RHA1 NR	NRPS	NRPS
YPO0776|gb|NC_003143.1|_Proteobacteria_(Gamma)_-_Yersinia_pestis_CO92_NRPS_Thioesterase		Y0.g.NC 003143.1 Proteobacteria Gamma - Yersinia pestis CO92 NRP	NRPS	NRPS
paeF|gb|HQ668144.1|_Firmicutes_-_Paenibacillus_elgii_B69_Paenibactin_NRPS_Thioesterase		pae.g.HQ668144.1 Firmicutes - Paenibacillus elgii B69 Paenibacti	NRPS	NRPS
bacC|gb|AF007865.2|_Firmicutes_-_Bacillus_licheniformis_Bacitracin_NRPS_Thioesterase		bac.g.AF007865.2 Firmicutes - Bacillus licheniformis Bacitracin	NRPS	NRPS
BA_2372|gb|NC_003997.3|_Firmicutes_-_Bacillus_anthracis_str._Ames_NRPS_Thioesterase		BA 2372 gb NC 003997.3 Firmicutes - Bacillus anthracis str. Ames	NRPS	NRPS
licC|gb|U95370.1|_Firmicutes_-_Bacillus_licheniformis_Lichenysin_NRPS_Thioesterase		li.gb	NRPS	NRPS
MAV_3056|gb|CP000479.1|_Actinobacteria_-_Mycobacterium_avium_104_NRPS_Thioesterase		MAV 3056 gb CP000479.1 Actinobacteria - Mycobacterium avium 104	NRPS	NRPS
ROP_02580|gb|NC_012522.1|_Actinobacteria_-_Rhodococcus_opacus_B4_NRPS_Thioesterase		ROP 02580 gb NC 012522.1 Actinobacteria - Rhodococcus opacus B4	NRPS	NRPS
ROP_02610|gb|NC_012522.1|_Actinobacteria_-_Rhodococcus_opacus_B4_NRPS_Thioesterase		ROP 02610 gb NC 012522.1 Actinobacteria - Rhodococcus opacus B4	NRPS	NRPS
ROP_04690|gb|NC_012522.1|_Actinobacteria_-_Rhodococcus_opacus_B4_NRPS_Thioesterase		ROP 04690 gb NC 012522.1 Actinobacteria - Rhodococcus opacus B4	NRPS	NRPS
ROP_20370|gb|NC_012522.1|_Actinobacteria_-_Rhodococcus_opacus_B4_NRPS_Thioesterase		ROP 20370 gb NC 012522.1 Actinobacteria - Rhodococcus opacus B4	NRPS	NRPS
ROP_21090|gb|NC_012522.1|_Actinobacteria_-_Rhodococcus_opacus_B4_NRPS_Thioesterase		ROP 21090 gb NC 012522.1 Actinobacteria - Rhodococcus opacus B4	NRPS	NRPS
ROP_33190|gb|NC_012522.1|_Actinobacteria_-_Rhodococcus_opacus_B4_NRPS_Thioesterase		ROP 33190 gb NC 012522.1 Actinobacteria - Rhodococcus opacus B4	NRPS	NRPS
ROP_51630|gb|NC_012522.1|_Actinobacteria_-_Rhodococcus_opacus_B4_NRPS_Thioesterase		ROP 51630 gb NC 012522.1 Actinobacteria - Rhodococcus opacus B4	NRPS	NRPS
ROP_51640|gb|NC_012522.1|_Actinobacteria_-_Rhodococcus_opacus_B4_NRPS_Thioesterase		ROP 51640 gb NC 012522.1 Actinobacteria - Rhodococcus opacus B4	NRPS	NRPS
ROP_54870|gb|NC_012522.1|_Actinobacteria_-_Rhodococcus_opacus_B4_NRPS_Thioesterase		ROP 54870 gb NC 012522.1 Actinobacteria - Rhodococcus opacus B4	NRPS	NRPS
ROP_55220|gb|NC_012522.1|_Actinobacteria_-_Rhodococcus_opacus_B4_NRPS_Thioesterase		ROP 55220 gb NC 012522.1 Actinobacteria - Rhodococcus opacus B4	NRPS	NRPS
tycC|gb|AF004835.1|_Firmicutes_-_Brevibacillus_brevis_Tyrocydine_NRPS_Thioesterase		ty.g.AF004835.1 Firmicutes - Brevibacillus brevis Tyrocydine NRP	NRPS	NRPS
grsB|gb|X61658.1|_Firmicutes_-_Brevibacillus_brevis_Gramicidin_NRPS_Thioesterase		gr.gb	NRPS	NRPS
srfA3|gb|X70356.1|_Firmicutes_-_Bacillus_subtilis_Surfactin_NRPS_Thioesterase		sr.gb	NRPS	NRPS
teg8|gb|EU874253.1|_Unknown_-_uncultured_soil_bacterium_NRPS_Thioesterase		teg.g.EU874253.1 Unknown - uncultured soil bacterium NRPS Thioes	NRPS	NRPS
veg9|gb|EU874252.1|_Unknown_-_uncultured_soil_bacterium_NRPS_Thioesterase		ve.g.EU874252.1 Unknown - uncultured soil bacterium NRPS Thioest	NRPS	NRPS
CuracinTE		CuracinTE	T1	T1
DebsTE		DebsTE	T1	T1
dehydrocurvulacin		dehydrocurvulacin	T1	T1
FabA		FabA	Fatty Acid	Fatty Acid
FenTE		FenTE	NRPS	NRPS
PikTE		PikTE	T1	T1
Radicicol		Radicicol	T1	T1
SurfactinTE		SurfactinTE	NRPS	NRPS
TesA (P.aeru esterase)		Te.P.aeru esterase	Esterase	Esterase
Tiacumicin (R-ester)		Ti.R.ester	T1	T1
Ndas_0496|gb|NC_014210.1|_Actinobacteria_-_Nocardiopsis_dassonvillei_subsp._dassonvillei_DSM_43111_T1PKS_Thioesterase		Ndas 0496 gb NC 014210.1 Actinobacteria - Nocardiopsis dassonvil	T1	T1
SACE_0724|gb|NC_009142.0|_Actinobacteria_-_Saccharopolyspora_erythraea_NRRL_2338_Erythromycin_T1PKS_Thioesterase		SACE 0724 gb NC 009142.0 Actinobacteria - Saccharopolyspora eryt	T1	T1
MAP_0220|gb|AE016958.1|_Actinobacteria_-_Mycobacterium_avium_subsp._paratuberculosis_K-10_T1PKS_Thioesterase		MAP 0220 gb AE016958.1 Actinobacteria - Mycobacterium avium subs	T1	T1
SGR_6183|gb|NC_010572.1|_Actinobacteria_-_Streptomyces_griseus_subsp._griseus_NBRC_13350_T1PKS_Thioesterase		SGR 6183 gb NC 010572.1 Actinobacteria - Streptomyces griseus su	T1	T1
RGBS107_09711|gb|DS544878.1|_Proteobacteria_(Alpha)_-_Phaeobacter_gallaeciensis_BS107_T1PKS_Thioesterase		RGBS107 09711 gb DS544878.1 Proteobacteria Alpha - Phaeobacter g	T1	T1
AAZ94391.1|gb|DQ149987.0|_Actinobacteria_-_Streptomyces_neyagawaensis_Concanamycin_A_T1PKS_Thioesterase		AAZ94391.1 gb DQ149987.0 Actinobacteria - Streptomyces neyagawae	T1	T1
Strop_2778|gb|CP000667.1|_Actinobacteria_-_Salinispora_tropica_CNB-440_Salinilactam_T1PKS_Thioesterase		Strop 2778 gb CP000667.1 Actinobacteria - Salinispora tropica CN	T1	T1
SACE_0724|gb|NC_009142.1|_Actinobacteria_-_Saccharopolyspora_erythraea_NRRL_2338_T1PKS_Thioesterase		SACE 0724 gb NC 009142.1 Actinobacteria - Saccharopolyspora eryt	T1	T1
SACE_4138|gb|NC_009142.1|_Actinobacteria_-_Saccharopolyspora_erythraea_NRRL_2338_T1PKS_Thioesterase		SACE 4138 gb NC 009142.1 Actinobacteria - Saccharopolyspora eryt	T1	T1
SADFL11_1546|gb|EQ973121.1|_Proteobacteria_(Alpha)_-_Labrenzia_alexandrii_DFL-11_T1PKS_Thioesterase		SADFL11 1546 gb EQ973121.1 Proteobacteria Alpha - Labrenzia alex	T1	T1
ttnB|gb|EU035755.1|_Actinobacteria_-_Streptomyces_griseochromogenes_Tautomycetin_T1PKS_Thioesterase		ttn.g.EU035755.1 Actinobacteria - Streptomyces griseochromogenes	T1	T1
AAT69682.1|gb|AY649543.1|_Eukaryota_(Fungi)_-_Cercospora_nicotianae_Cercosporin_T1PKS_Thioesterase		AAT69682.1 gb AY649543.1 Eukaryota Fungi - Cercospora nicotianae	T1	T1
ABI94380.1|gb|DQ983361.1|_Actinobacteria_-_Streptomyces_sp._CK4412_Tautomycetin_T1PKS_Thioesterase		ABI94380.1 gb DQ983361.1 Actinobacteria - Streptomyces sp. CK441	T1	T1
MSMEG_6392|gb|CP000480.1|_Actinobacteria_-_Mycobacterium_smegmatis_str._MC2_155_T1PKS_Thioesterase		MSMEG 6392 gb CP000480.1 Actinobacteria - Mycobacterium smegmati	T1	T1
SACE_4138|gb|AM420293.0|_Actinobacteria_-_Saccharopolyspora_erythraea_NRRL_2338_T1PKS_Thioesterase		SACE 4138 gb AM420293.0 Actinobacteria - Saccharopolyspora eryth	T1	T1
ttmH|gb|EF990140.1|_Actinobacteria_-_Streptomyces_spiroverticillatus_Tautomycin_T1PKS_Thioesterase		ttm.g.EF990140.1 Actinobacteria - Streptomyces spiroverticillatu	T1	T1
AEZ54379.1|gb|HQ840721.0|_Actinobacteria_-_Streptomyces_piomogenus_Piericidin_T1PKS_Thioesterase		AEZ54379.1 gb HQ840721.0 Actinobacteria - Streptomyces piomogenu	T1	T1
meiA4|gb|FJ952082.1|_Actinobacteria_-_Streptomyces_nanchangensis_Meilingmycin_T1PKS_Thioesterase		me.g.FJ952082.1 Actinobacteria - Streptomyces nanchangensis Meil	T1	T1
MXAN_2798|gb|NC_008095.1|_Proteobacteria_(Delta)_-_Myxococcus_xanthus_DK_1622_T1PKS_Thioesterase		MXAN 2798 gb NC 008095.1 Proteobacteria Delta - Myxococcus xanth	T1	T1
nysK|gb|AF263912.0|_Actinobacteria_-_Streptomyces_noursei_ATCC_11455_Nystatin_T1PKS_Thioesterase		ny.g.AF263912.0 Actinobacteria - Streptomyces noursei ATCC 11455	T1	T1
ambH|gb|DQ897667.1|_Proteobacteria_(Delta)_-_Sorangium_cellulosum_Ambruticin_T1PKS_Thioesterase		amb.g.DQ897667.1 Proteobacteria Delta - Sorangium cellulosum Amb	T1	T1
eryAIII|gb|AY623658.0|_Actinobacteria_-_Aeromicrobium_erythreum_Erythromycin_T1PKS_Thioesterase		er.g.AY623658.0 Actinobacteria - Aeromicrobium erythreum Erythro	T1	T1
jerE|gb|DQ897668.0|_Proteobacteria_(Delta)_-_Sorangium_cellulosum_Jerangolid_T1PKS_Thioesterase		j.g.DQ897668.0 Proteobacteria Delta - Sorangium cellulosum Jeran	T1	T1
pks2|gb|FJ952082.1|_Actinobacteria_-_Streptomyces_nanchangensis_Meilingmycin_T1PKS_Thioesterase		pk2.g.FJ952082.1 Actinobacteria - Streptomyces nanchangensis Mei	T1	T1
SAMR0474|gb|AM238664.2|_Actinobacteria_-_Streptomyces_ambofaciens_ATCC_23877_T1PKS_Thioesterase		SA.g.AM238664.2 Actinobacteria - Streptomyces ambofaciens ATCC 2	T1	T1
spiJ|gb|AM407731.1|_Proteobacteria_(Delta)_-_Sorangium_cellulosum_Spirangien_T1PKS_Thioesterase		spi.g.AM407731.1 Proteobacteria Delta - Sorangium cellulosum Spi	T1	T1
Tcur_4756|gb|NC_013510.1|_Actinobacteria_-_Thermomonospora_curvata_DSM_43183_T1PKS_Thioesterase		Tcur 4756 gb NC 013510.1 Actinobacteria - Thermomonospora curvat	T1	T1
pksST|gb|L39121.1|_Eukaryota_(Fungi)_-_Emericella_nidulans_Sterigmatocystin_T1PKS_Thioesterase		pkS.gb	T1	T1
MT3907|gb|NC_002755.2|_Actinobacteria_-_Mycobacterium_tuberculosis_CDC1551_T1PKS_Thioesterase		MT3.g.NC 002755.2 Actinobacteria - Mycobacterium tuberculosis CD	T1	T1
chmGV|gb|AY509120.1|_Actinobacteria_-_Streptomyces_bikiniensis_Chalcomycin_T1PKS_Thioesterase		chm.g.AY509120.1 Actinobacteria - Streptomyces bikiniensis Chalc	T1	T1
MT0418|gb|NC_002755.2|_Actinobacteria_-_Mycobacterium_tuberculosis_CDC1551_T1PKS_Thioesterase		MT0.g.NC 002755.2 Actinobacteria - Mycobacterium tuberculosis CD	T1	T1
pldAIV|gb|AB435553.1|_Actinobacteria_-_Streptomyces_platensis_Pladienolide_T1PKS_Thioesterase		pld.g.AB435553.1 Actinobacteria - Streptomyces platensis Pladien	T1	T1
plm7|gb|AY354515.1|_Actinobacteria_-_Streptomyces_sp._HK803_Phoslactomycin_T1PKS_Thioesterase		plm.g.AY354515.1 Actinobacteria - Streptomyces sp. HK803 Phoslac	T1	T1
SAV_2895|gb|NC_003155.4|_Actinobacteria_-_Streptomyces_avermitilis_MA-4680_T1PKS_Thioesterase		SAV 2895 gb NC 003155.4 Actinobacteria - Streptomyces avermitili	T1	T1
ADC79620.1|gb|GU390405.1|_Actinobacteria_-_Streptomyces_lohii_Bafilomycin_T1PKS_Thioesterase		ADC79620.1 gb GU390405.1 Actinobacteria - Streptomyces lohii Baf	T1	T1
aveA4|gb|AB032367.1|_Actinobacteria_-_Streptomyces_avermitilis_Avermectin_T1PKS_Thioesterase		av.g.AB032367.1 Actinobacteria - Streptomyces avermitilis Averme	T1	T1
Mvan_5640|gb|CP000511.1|_Actinobacteria_-_Mycobacterium_vanbaalenii_PYR-1_T1PKS_Thioesterase		Mvan 5640 gb CP000511.1 Actinobacteria - Mycobacterium vanbaalen	T1	T1
olmA7|gb|AB070940.1|_Actinobacteria_-_Streptomyces_avermitilis_Oligomycin_T1PKS_Thioesterase		ol.g.AB070940.1 Actinobacteria - Streptomyces avermitilis Oligom	T1	T1
pikAIV|gb|AF079138.1|_Actinobacteria_-_Streptomyces_venezuelae_Methymycin_T1PKS_Thioesterase		pik.g.AF079138.1 Actinobacteria - Streptomyces venezuelae Methym	T1	T1
Rv3800c|gb|NC_000962.2|_Actinobacteria_-_Mycobacterium_tuberculosis_H37Rv_T1PKS_Thioesterase		Rv3.g.NC 000962.2 Actinobacteria - Mycobacterium tuberculosis H3	T1	T1
SAV_415|gb|NC_003155.4|_Actinobacteria_-_Streptomyces_avermitilis_MA-4680_T1PKS_Thioesterase		SAV 415 gb NC 003155.4 Actinobacteria - Streptomyces avermitilis	T1	T1
SAV_943|gb|NC_003155.4|_Actinobacteria_-_Streptomyces_avermitilis_MA-4680_T1PKS_Thioesterase		SAV 943 gb NC 003155.4 Actinobacteria - Streptomyces avermitilis	T1	T1
SPO0849|gb|NC_003911.11|_Proteobacteria_(Alpha)_-_Ruegeria_pomeroyi_DSS-3_T1PKS_Thioesterase		SP.g.NC 003911.11 Proteobacteria Alpha - Ruegeria pomeroyi DSS-3	T1	T1
vinP4|gb|AB086653.1|_Actinobacteria_-_Streptomyces_halstedii_Vicenistatin_T1PKS_Thioesterase		vi.g.AB086653.1 Actinobacteria - Streptomyces halstedii Vicenist	T1	T1
becG|gb|FJ872523.0|_Actinobacteria_-_Streptomyces_sp._DSM_21069_BE-14106_T1PKS_Thioesterase		be.g.FJ872523.0 Actinobacteria - Streptomyces sp. DSM 21069 BE-1	T1	T1
fosF|gb|HQ434551.0|_Actinobacteria_-_Streptomyces_pulveraceus_Fostriecin_T1PKS_Thioesterase		fo.g.HQ434551.0 Actinobacteria - Streptomyces pulveraceus Fostri	T1	T1
Mspyr1_50180|gb|NC_014814.0|_Actinobacteria_-_Mycobacterium_gilvum_Spyr1_T1PKS_Thioesterase		Mspyr1 50180 gb NC 014814.0 Actinobacteria - Mycobacterium gilvu	T1	T1
pksA|gb|DQ149246.3|_Eukaryota_(Fungi)_-_Mycosphaerella_pini_Dothistromin_T1PKS_Thioesterase		pkA.g.DQ149246.3 Eukaryota Fungi - Mycosphaerella pini Dothistro	T1	T1
pksL1|gb|L42765.1|_Eukaryota_(Fungi)_-_Aspergillus_parasiticus_Aflatoxin_T1PKS_Thioesterase		pkL.gb	T1	T1
Rv0405|gb|NC_000962.2|_Actinobacteria_-_Mycobacterium_tuberculosis_H37Rv_T1PKS_Thioesterase		Rv0.g.NC 000962.2 Actinobacteria - Mycobacterium tuberculosis H3	T1	T1
Sare_3151|gb|NC_009953.1|_Actinobacteria_-_Salinispora_arenicola_CNS-205_T1PKS_Thioesterase		Sare 3151 gb NC 009953.1 Actinobacteria - Salinispora arenicola	T1	T1
sorB|gb|U24241.0|_Proteobacteria_(Delta)_-_Sorangium_cellulosum_Soraphen_T1PKS_Thioesterase		so.gb	T1	T1
amphK|gb|AF357202.1|_Actinobacteria_-_Streptomyces_nodosus_Amphotericin_T1PKS_Thioesterase		amp.g.AF357202.1 Actinobacteria - Streptomyces nodosus Amphoteri	T1	T1
apoS8|gb|JF819834.1|_Actinobacteria_-_Nocardiopsis_sp._FU40_Apoptolidin_T1PKS_Thioesterase		ap.g.JF819834.1 Actinobacteria - Nocardiopsis sp. FU40 Apoptolid	T1	T1
gfsE|gb|AB469193.0|_Actinobacteria_-_Streptomyces_graminofaciens_FD-891_T1PKS_Thioesterase		gf.g.AB469193.0 Actinobacteria - Streptomyces graminofaciens FD-	T1	T1
Mflv_1169|gb|NC_009338.1|_Actinobacteria_-_Mycobacterium_gilvum_PYR-GCK_T1PKS_Thioesterase		Mflv 1169 gb NC 009338.1 Actinobacteria - Mycobacterium gilvum P	T1	T1
nidA5|gb|AF016585.0|_Actinobacteria_-_Streptomyces_caelestis_Niddamycin_T1PKS_Thioesterase		ni.g.AF016585.0 Actinobacteria - Streptomyces caelestis Niddamyc	T1	T1
pks1|gb|AF151533.1|_Eukaryota_(Fungi)_-_Nodulisporium_sp._ATCC74245_THN_T1PKS_Thioesterase		pk1.g.AF151533.1 Eukaryota Fungi - Nodulisporium sp. ATCC74245 T	T1	T1
spnE|gb|AY007564.1|_Actinobacteria_-_Saccharopolyspora_spinosa_Spinosad_T1PKS_Thioesterase		spn.g.AY007564.1 Actinobacteria - Saccharopolyspora spinosa Spin	T1	T1
aurC|gb|AJ575648.0|_Actinobacteria_-_Streptomyces_thioluteus_Aureothin_T1PKS_Thioesterase		au.g.AJ575648.0 Actinobacteria - Streptomyces thioluteus Aureoth	T1	T1
borA6|gb|AJ580915.1|_Actinobacteria_-_Streptomyces_parvulus_Borrelidin_T1PKS_Thioesterase		bo.g.AJ580915.1 Actinobacteria - Streptomyces parvulus Borrelidi	T1	T1
lkmAIII|gb|AB088224.2|_Actinobacteria_-_Streptomyces_rochei_Lankamycin_T1PKS_Thioesterase		lk.g.AB088224.2 Actinobacteria - Streptomyces rochei Lankamycin	T1	T1
MUL_4983|gb|NC_008611.1|_Actinobacteria_-_Mycobacterium_ulcerans_Agy99_T1PKS_Thioesterase		MUL 4983 gb NC 008611.1 Actinobacteria - Mycobacterium ulcerans	T1	T1
pks4|gb|AJ278141.1|_Eukaryota_(Fungi)_-_Gibberella_fujikuroi_Bikaverin_T1PKS_Thioesterase		pk4.g.AJ278141.1 Eukaryota Fungi - Gibberella fujikuroi Bikaveri	T1	T1
nfa1890|gb|NC_006361.1|_Actinobacteria_-_Nocardia_farcinica_IFM_10152_T1PKS_Thioesterase		nf18.g.NC 006361.1 Actinobacteria - Nocardia farcinica IFM 10152	T1	T1
RHA1_ro04065|gb|NC_008268.1|_Actinobacteria_-_Rhodococcus_jostii_RHA1_T1PKS_Thioesterase		RH.r4.gb NC 008268.1 Actinobacteria - Rhodococcus jostii RHA1 T1	T1	T1
mlaG|gb|FJ872525.0|_Actinobacteria_-_Streptomyces_sp._MP39-85_ML-449_T1PKS_Thioesterase		ml.g.FJ872525.0 Actinobacteria - Streptomyces sp. MP39-85 ML-449	T1	T1
wA|gb|X65866.2|_Eukaryota_(Fungi)_-_Emericella_nidulans_Naphtopyrone_T1PKS_Thioesterase		w.gb	T1	T1
PKS1|gb|D83643.1|_Eukaryota_(Fungi)_-_Colletotrichum_lagenarium_THN_T1PKS_Thioesterase		PK.gb	T1	T1
PKS1|gb|AF130309.3|_Eukaryota_(Fungi)_-_Exophiala_dermatitidis_THN_T1PKS_Thioesterase		PK.g.AF130309.3 Eukaryota Fungi - Exophiala dermatitidis THN T1P	T1	T1
alb1|gb|AF025541.1|_Eukaryota_(Fungi)_-_Aspergillus_fumigatus_THN_T1PKS_Thioesterase		al1.g.AF025541.1 Eukaryota Fungi - Aspergillus fumigatus THN T1P	T1	T1
cce_3761|gb|CP000806.1|_Cyanobacteria_-_Cyanothece_sp._ATCC_51142_T1PKS_Thioesterase		cce 3761 gb CP000806.1 Cyanobacteria - Cyanothece sp. ATCC 51142	T1	T1
MAV_0218|gb|CP000479.1|_Actinobacteria_-_Mycobacterium_avium_104_T1PKS_Thioesterase		MAV 0218 gb CP000479.1 Actinobacteria - Mycobacterium avium 104	T1	T1
ROP_39430|gb|NC_012522.1|_Actinobacteria_-_Rhodococcus_opacus_B4_T1PKS_Thioesterase		ROP 39430 gb NC 012522.1 Actinobacteria - Rhodococcus opacus B4	T1	T1
Francci3_2981|gb|NC_007777.1|_Actinobacteria_-_Frankia_sp._CcI3_T1PKS_Thioesterase		Francci3 2981 gb NC 007777.1 Actinobacteria - Frankia sp. CcI3 T	T1	T1
Mjls_5391|gb|CP000580.1|_Actinobacteria_-_Mycobacterium_sp._JLS_T1PKS_Thioesterase		Mjls 5391 gb CP000580.1 Actinobacteria - Mycobacterium sp. JLS T	T1	T1
Mkms_5098|gb|CP000518.1|_Actinobacteria_-_Mycobacterium_sp._KMS_T1PKS_Thioesterase		Mkms 5098 gb CP000518.1 Actinobacteria - Mycobacterium sp. KMS T	T1	T1
Mmcs_5010|gb|CP000384.1|_Actinobacteria_-_Mycobacterium_sp._MCS_T1PKS_Thioesterase		Mmcs 5010 gb CP000384.1 Actinobacteria - Mycobacterium sp. MCS T	T1	T1
pks1|gb|AF549411.1|_Eukaryota_(Fungi)_-_Glarea_lozoyensis_THN_T1PKS_Thioesterase		pk1.g.AF549411.1 Eukaryota Fungi - Glarea lozoyensis THN T1PKS T	T1	T1
