# Supplementary material for: Polyketide synthase and non-ribosomal peptide synthetase thioesterase selectivity: logic gate or a victim of fate?
Source: Royal Society of Chemistry journal article supplement (doi:10.1039/c4np00148f), 2015-02-02
Supplement: c4np00148f8.fas [file c4np00148f8.fas]

>aveA4|gb|AB032367.1| Actinobacteria - Streptomyces avermitilis Avermectin T1PKS Thioesterase
--ALICLPTVAAVSSVYQYSRFAAGLNG----HRDVWYVPAPGFL----EGE----PLPSGIGAVTRMFADAIVRFTDGA--------PFALAGHS-AGGWFVYAVTSHLER-------LGVRPEAVVTMDAYLP--DDGIA-------------PVASALTSEIFD--R------------------------------------VTQFVDVDYTRLVAMGGYFRI--FSGWSP--------------------PDITTP--------------------------------------------------------------------------ALFLRGRD-------------------GE------QMPPPWGVPHTVLDIQGNHFTML----------------------------
>Q03093 STRHY/15-243
--ARVVCLSRAGGSSARDFDRWRAPMGED---HVELAAVQLPGRLDRFHEP------PLSDLHEIAEEVAAALTTLPARA--------PYVLFGDC-MGALLAFETACALRRR------GAAPPDCLVVASYPAPDRDLRTERPYGDGSAD----PVASALTSEIDL----------------RQRLREVGGV--PPAVLDEDE-LFELMLPMLRADFAAFEGYRRI--FSGWSP-----HRPTEPL--------PDITTP---------------------------------------------------------------------SVDIHALVGADDPYVTVT--DLHG--------GE-----WQRHTTGEFTHTARALPGGHFFLHE-SDD--AVSRVRSLALAG---------
>Q00442 SACER/16-240
--ARLVCFPHAGVAAADSYLDLARALAP----EIDVDAVQYPGRQDRRDEE------PLGTAGEIADEVAAVLRASGGDG--------PFALFGHS-MGALIAYETARRLERE------PGGGPLRLFVSGQTAPR-DVHERRTDLPGDDG----PVASALTSEIFL----------------VDELRRLG-T---SEAALADEALLAMSLPVLRADYRVLRSYAWI--FSGWSP---ADGPPLRAG--------PDITTP------------------------------------------------------------------------ITALCGDADPLTATG---DAER-------GE-----WLQHSVIPGRHTTRTFPGGHFYLG---EQ--VTEVAGAVRRDL---------
>P72176 PSEAI/17-239
--LRLACFPHAGGSSASFFRSWSERLPP----DIDLLALQYPGREDRFNEA------PATRLEDLADGAALALRDFADAA--------PLALFGHS-LGAALAYETALRLETP------LGAALRHLFVSAHPAPHRDQRGGALHRGDEAA----PVASALTSEIFL----------------LEDVRRQGGA---S-ELLEDADLRALFLPILRADYQAIETYRRI--FSGWSP----RAQPIALA--------PDITTP----------------------------------------------------------------------CALDVLLGEHDEEVSAA---EAQA-------GE-----WSDASRTPARHTLRRFPGGHFYLSE---G--RDAVIEHLLRRL---------
>Q03094 STRHY/25-253
--VRLLCFPHAGVAGPGVYRPWAEDMPS----YAELWAARYPGREDRLAHP------FATSLSELADDLAAAAAAGLSRD-------VPLALFGHS-MGAVIAHEVAVRLENN------HDFRPVLLAVSAREGPLQDVAHAGLHLLDDDA----PVASALTSEIFL----------------VARTRGMGIQ--PNADAYADPELRELLLPVLRDDCRLLETHPRI--FSGWSP-----TSPVTRV--------PDITTP---------------------------------------------------------------------RAPVLAFAGRSDPASPAA--LMSS--------GE-----WAEATSGAFRHTLLEMPGDHFYLFS---H--TKDLLSELIPAL---------
>PABT STRGR/128-352
--VRLVCFPHAGGSSASFYHPVSARFAP----GAEVVSLQYPGRQDRRKEP------CVPDLGTLADLITEQLLPLDERA--------PTVFFGHS-MGAALAFETAWRLEQK------GAGRPRTVIASGRRGPSTDTRAERVHTRDDDG----PVASALTSEIFI----------------VAEMKRLNGT---AAGVLGDEEILRMALPALRGDYRAIETYTRI--FSGWSP-----CPPDRRL--------PDITTP---------------------------------------------------------------------ACGLTVLTGEDDPLTTVE---EAER-------GE-----WRDHTTGPFRHTLRVFTGGHFFLT---QH--LDAVNTEIAQAL---------
>Q54145 STRFR/15-245
--HRLVCFPHAGGSSARAYRPFALELAAA---GVETHAVQYPGRQDRRKEP------FARTLEELAERVLPELRRLLDAPDG-----VPVALFGHS-MGAVVAYETARLLHRS------GAPRPAGLILSGRRAPTADDRTETAHLLGDRE----PVASALTSEIFL----------------LAEIRRLQGT---DPGALADEEVLRMVLPAIRGDYAAVGRYRRI--FSGWSP-----HVPGPRP--------PDITTP---------------------------------------------------------------------GCPLTVFTGDADPNVTLP---EAEA-------GE-----WRELTTGAFAHTLRVFPGGHFYLN---DQ--REAVCRTIEETL---------
>MBTB MYCTU/1188-1413
--GAVLVFPHAGGSAAAAYRWLAKSLVAN---DVDTFVVQYPQRADRRSHP------AADSIEALALELFEAGDWHLTAA--------PLTLFGHC-MGAIVAFEFARLAERN------LGVPVRALWASSGQAPSTDVAASGPLPTADRD----PVASALTSEIFV----------------LADMVDLGGT---DPVLLEDEEFVELLVPAVKADYRALSGYSRI--FSGWS------CPPDVRI--------PDITTP-------------------------------------------------------------------R--ANIHAVGGNRDHRISREMLTS----------GE-----WETHTSGRFTHTLSHFDGGHFYLN---DH--LDAVARMVSADV---------
>TESA MYCTU/29-254
--PTLYIFPHAGGSTAKDYVAFSREFSAD---HVKRIAVQYPGQHDRSGLP------PLESIPTLADEIFAMMKPSARID-------DPVAFFGHS-MGGMLAFEVALRYQSA------LGHRVLAFFVSACSAPGHDIRYKQLQDLSDRE----PVASALTSEIFM----------------LDLFTRMTGM--N-PDFFTDDEFFVGALPTLR-AVRAIAGYSRI--FSGWSP-----CPPETKL--------PDITTP---------------------------------------------------------------------SCPIYAFIGDKDWIATQD--DMDP--------GE-----WRDRTTEEFSHTIRVFPGDHFYLN---DN--LPELVSDIEDKT---------
>SRFAD BACSU/14-234
--TQLICFPFAGGSYSASFRPLHAFLQG----ECEMLAAEPPGHG-TNQTS------AIEDLEELTDLYKQELNLRPDRA--------PFVLFGHS-MGGMITFRLAQKLERE------LGIFPQAVIISAIQPPHIDQRKKVSHLPDDQ-----PVASALTSEIFF----------------LDHIIQLGGM---PAELVENKEVMSFFLPSFRSDYRALEQFELI--FSGWSP--YDLAQIQSP---------PDITTP------------------------------------------------------------------------VHVFNGLDDKKCIRD----AEG-------GE-----WKKWAKDITPH-FHQFDGGHMFLL----SQ--TEEVAERIFAIL--------
>ANGT VIBAN/17-246
--THYVLCPFAGGSGSGAFRHWRTLSLEN---HEVISVMLYPGREFRIDDP------TVINIGTLAEEMIQALKTCNQRI-------EDTIIVGHS-MGAQVAYEASKKLVNQ------LGLFLKGLIISGCQAPHIKGRRLLGECDDKT-----PVASALTSEIFF----------------IHNLVEIGGC---DPSLAKSPEWWPIFLPALRADFTATEQYIFI--FSGWSP---TSLPNDKEG--------PDITTP--------------------------------------------------------------------LPIPTLLISGDQDREANFS--EIEE--------GE-----WKLWCNKVVDHTHLVVEGGHFYITE------QPQMMLECIRAL---------
>Q56949 YERPE/19-252
--AHLVMCPFAGGSSSSAFRHWQAEQLTD---HCALSLVTWPGRDRLRHLE------PLRSITQLAALLANELEASVSPD-------TPLLLAGHS-MGAQVAFETCRLLEQR------LGLAPQGLIISGCHAPHLHSERQLSHRDDAD-----PVASALTSEIFF----------------IAELIDIGG---CSPELRENQELMSLFLPLLRADFYATESYHYDS-FSGWSP-PDVCPPLRTP---------PDITTP------------------------------------------------------------------------ALLLCGSHDREASWQ--QVDA--------GE-----WRQWLSHVTGHTPVVIDGDHFYPIQ-QARSFFTQIVRHFPHAF---------
>O30412 BREBE/1-235
--MKLFCFPYAGGSLPGIYYSWKSRLPPTFL-EIDAFEVRPHIPQPNRDVF------LPTSFYELLEDVCDRITPALTET--------PFAFFGHS-MGGLVAFELTRKLMQK------GAPLPQHLFLSASRAPHAYGKLAKTYNLPHDE----PVASALTSEIFF----------------VEALRKLGGT---PDDVLENQELLELFLPILRADFQAVQTYEMI--FSGWSP--NPDLPRQVP---------PDITTP----------------------------------------------------------------------VNMTVLYGTEDTIALED---IWA--------GE-----WRDYCQGACQHTFFPVSGGHFFIHH-QTS--PILEIIQNVLKEE--------
>GRST ANEMI/22-248
--LRLFCIPYAGGSGASAFYEWSHFFPK----EIEVCSIQLPGRENRGAEV------PLTNLQQIVEIVAEEIQPLINIA--------PFAFLGHS-MGALISFELARTIRQK------SNVNPVHLFVSGRHAPQIPCAKQDYHLLPDEQ----PVASALTSEIFF----------------IQELRSLNGT---PEIVLQDAEMMSILLPRLRADFSVCGSYQYI--FSGWSP--KNDEPFECP---------PDITTP------------------------------------------------------------------------ITAFGGKNDNGVTYQ--SLEA--------GE-----WREQTKREFSHTVCMYPGDHFFLYE---S---KYEMIEFMCKQL--------
>SAST ANAPL/16-246
--CRLICFPWAGGSNCSFFIRWCEAFSS----IIVVSVIRLAGRECRDTEP------FPEDMAEVVNEITNALLKDLQEK--------PFALFGHS-FGSFVSYALAVHLKEK------HGLEPVHMFFSGSYGPHSEYFHLMYKLPEVEDS---PVASALTSEIRL----------------LELIHTLGGT---PPEFLQNEQITKHLLRVLKEDQKVLVTYPWI--FSGWSP---HDVRKKYFS--------PDITTP----------------------------------------------------------------------CDLTCFNGSDEKNHGSEA-------------GE-----WIAITSGDTSHTIYSLPGNHFYLME-PSN---ETFLIKYITKCI--------
>SAST RAT/27-256
--FKLICFPWAGGSGSIHFAKWGQKINDS---HLEVHAVRLAGRETRLGEP------FANDIYQIADEIVTALLPIIQDK--------AFAFFGHS-FGSYIALITALLLKEK------YKMEPLHIFVSGASAPHSTSRPQVPDLNELTEE---PVASALTSEIQV----------------RHHLLDFGGT---PKHLIEDQDVLRMFIPLLKADAGVVKKFIFI--FSGWSP----DKPSKALL--------PDITTP---------------------------------------------------------------------SLDITGFLGSEDTIKDIEG-------------GE-----WQDLTSGKFDHTVHMLPGDHFYLMK-PDN---ENFIKNYIAKC---------
>P72117 PSEAI/7-233
--LQLFCLPYSGVASARLFRRWQPSLPG----WIRLLPLELPGRGLRFGEA------LHTDAASLVAQLAGELQGTLDSA-------SPYAFFGHS-LGGLLAFELAHAMRRR------GLEGPLALFLSGVSPPAENDVSGYRRAKADAE----PVASALTSEIFL----------------VAALRDYRGT---PEAVLNDPSLMQMLLPVVRADFSSPAATARI--FSGWSP---TRRMALD----------PDITTP----------------------------------------------------------------------AALHLFGGREDSLRS--AELLG---------GE-----WLHEAGGDFTHTLDLLDGQHFFIRE---Q--QGQLLRLLRRYA---------
>O30482 STRHY/1725-1933
--RVVCVPAVTPAATPHEYDALGRRLDG----VLASAVLPYPGFG----AGQ----AMPEDRRTLVGMHARSVLDHVGDE--------PYVLVGRS-LGGTVAHAVTSELERL------LGRGPRGLVLIDTYLPLDDASRA-------------QEWLLGLPEIFD--R-------------------ARAAVEEGA--------VTPDDDVDYAALLAMGAYLRA--FADWTP-------------------RYAVTTP--------------------------------------------------------------------------PLFLRPGRPTPAMP---RKDG------GE-----WQATWPLPHDHTLIEVAGDHFTVLT--DE--VADTAEALLGWL---------
>ERYA3 SACER/2958-3167
--TVICCAGTAAISGPHEFTRLAGALRG----IAPVRAVPQPGYE----EGE----PLPSSMAAVAAVQADAVIRTQGDK--------PFVVAGHS-AGALMAYALATELLDR------LGHPPRGVVLIDVYPP--DGHQD-------------AMNAWLEELIFD--R-------------------TATLFDRET--------VRMDDDVDYTRLTALGAYDRL--TGQWRP-------------------PRETGLP--------------------------------------------------------------------------TLLVSAGEPMGPWP---DDS-------GE-----WKPTWPFEHDHTTVAVPGDHFTMVQ--EH--ADAIARHIDAWL---------
>OL56 STRAT/3304-3514
--QLICCSGTAPVGGPHEFARLASFFRGT---HRAVSALPLPGYL---LPGE----QLPADLDAVLAAQAEAVEKQTGGA--------PFVLVGYS-AGGLMAHALACHLAGR------GTPRPSGEVLVDVYPP--DGRQE-------------PVFGWQKELIFD--R-------------------TEGMFAQDF--------VPMDDDVDYTRLTALGTYDRL--MGEWRP-------------------PAPSGLP--------------------------------------------------------------------------TLLIRATEPMAEWTG---AID------GE-----WRASWEYDHTHTAVDMPGNHFTIMR--EH--AEDAARHIDVWL---------
>O30768 9ACTO/1642-1856
--RLYCCAGTAATSNPREYAHFADALRGR---HRDVTVLPLPGFG---DPAE----PLPASLDALLADRADALLEHCGGE--------PFALAGHS-AGANVAYALAAYLESR------GSGRPAAVVLMDMYFP--DDDPG-------------AMGVWRDDLIFD--R-------------------LRWSLERSP--------VPLAEDVDYHRLTAMAGYHRL--LLGSHP-------------------FTALRAP--------------------------------------------------------------------------VLLARASEPLREWSGDDGPDG------GE-----WRSRVPGVTSHTVTDVPGNHFTMLT--EY--AADTASAVHDWL---------
>O33958 STRFR/1605-1819
--LLVGCAGTAVASGPVEFTAFAGALADLPA-AAPMAALPQPGFL---LPGE----RVPATPEALFEAQAEALLRYAAGR--------PFVLLGHS-AGANMAHALTRHLEAN------GGGRPAGLVLMDIYTP--DADPG-------------AMGVWRNDMIFD--R-------------------FQWVWRRSD--------IPPDDDVDYHRLTAMGAYHRL--LLDWSP-------------------PTPVRAP--------------------------------------------------------------------------VLHLRAAEPMGDWP--PGDTG------GE-----WQSHWDGAHTHTTAGIPGNHFTMMT--EH--ASAAARLVHGWL---------
>FAS HUMAN/2242-2501
--RPLFLVHPIEGSSTTVFHSLASRLSIP-TYGLQCTRAAPLDFL----E-------LPSSIHSLAAYYIDCIRQVQPEG--------PYRVAGYS-YGACVAFEMCSQLQAQQS----PAPTHNSLFLFDGSPTYVDLAYTQSYRAKLTPGCEAEAASETEAICF--------------------FVQQFTDMEHNR-VLEALLPLKQFVDGLEERVAAAVDLIIKS-FSGWSP--------HQGLDRQELSFAPDITTP-------------------------------------------------------------------------ARSFYYKLRAAEQYTPKAKYHGNVMLLRAKTGGAYGEDLGADYNLSQVCDGKVSHFVHVIEGDHRTLLE-GSG--LESIISIIHSSL
>FAS CHICK/2243-2502
--RPLFLVHPIEGSSIAVFYTLASKLHMP-CYGLQCTKAAPLDFL----E-------LPSSIQSLASYYIDCMKQIQPEG--------PYRIAGYS-FGACVAFEMCSQLQAQQN----ASHALNSLFLFDGSHSFVDAAYTQSYRAKLTQGNEAALASETEALCA--------------------FVQQFTGIEYNK-LLEILLPLEQFVDDLEARVNAAADLITQIHKNIWSP-------NREALSFAAASF-PDITTP--------------------------------------------------------------------------ALFYHKLKAADKYIPESKYHGNVTLMRAKTHNEYEEGLGGDYRLSEVCDGKVSHFVHIIEGDHRTLLE-GDG--VESIIGIIHGSL
>ACVS CEPAC/3498-3711
--APLFLLPPGEGGAESYFHNIVKGLPNR-NLVVFNNHYREEKTL----E-------LLRTIEALAEYYLSHIRSIQPEG--------PYHILGWS-FGGILGLEAAKRLTGE------LGHKIATLALIDAYLPYFDDIPSASKAIGQPD----PVASALTSEIF--------------------DACVLDPIYHV------YHPSPESFRTVSSLTNHIALFKATETNDGWSP----------QHGNATQ---PDITTP--------------------------------------------------------------------------ALFLRGRQALYEWFATCPLNNLDKFLAADT-----QMPPPWGVPIKVVPLEGNHFTHFTWVHHPEQVR--------SMCTMLDEWL
>ACVS EMENI/3553-3767
--PILFLLPPGEGGAESYFNNIVKHLPTT-NMVVFNNYYLHSKSL----E-------LLNTFEKLAEMYLGHIRQIQPDG--------PYHFIGWS-FGGTIAMEISRQLVGL------LGSTIGLLGIIDAYLTYFDNVPGATRAIGLG-----PVASALTSEIF--------------------DTEVLDPIHHI------SQPEPADFQCLPASTDYIILFKATRVNDGWSP----------KFQSENQ---PDITTP--------------------------------------------------------------------------ALFLRGRRRLYEYYDKTLLNDLDWLLPGAS-----QMPPPWGVNIHLVRLEEDHFTHFSWATNPRQIA--------HVCSTIEKFL
>ACVS1 PENCH/3529-3743
--PTLFLLPPGEGGAESYFNNIVKRLRQT-NMVVFNNYYLHSKRL----E-------LLRTFEELAEMYLDQVRGIQPHG--------PYHFIGWS-FGGILAMEMSRRLVAS------LDEKIGFLGIIDAYLTYFDNVRGATRTIGLG-----PVASALTSEIF--------------------DTEILDPIHHI------YNPDPANFQRLPSATDRIVLFKAMRPNNGWSP----------KYESENQ---PDITTP--------------------------------------------------------------------------ALFLRGRRRLYEYYDGTRLNGLDSLLPSDS-----QMPPPWGDPVQLVPLTDDHFTHFSWVGNPQQVE--------QMCATIKEHL
>P94873 LYSLA/3503-3716
--PTLFVLPPGEGGAESYLNNLAKQLPNL-RLVLFNNVHLHTPFL----E-------LMQSFEDIAQYYMAHVRRLQPRG--------AYNFFGWS-FGGVVSLEMSLQLLND------LGESVSNLLMVDAYLSFFDNVEKTVDDLRLPK----PVASALTSEIF--------------------HGNSLDPINHR------YKPNEQALEALAKSADNIVLFKAIEPIDGWSP----------QHDSDEQ---PDITTP--------------------------------------------------------------------------ALFLRGRRKVFEYYASSPFNNLDTLLPPSA-----QMPPPWGVPFTLEILGDNHFSHFSWIHEKTTVD--------KVCSTTASLV
>ACVS NOCLA/3433-3646
--RTLFVLPPGEGGAESYLSNLARQLPDL-RLVLFNNVHLHTPFL----E-------LMGSFEELGRYYVEHIRRLQPSG--------PYHLLGWS-FGGVLSLEISRQLARA------LGERIDDLLLIDAYLPYFDGMRQASANIGLPG----PVASALTSEIF--------------------VEDILDPINYH------YRPDEADLARLAGRLGNLVLFKAGEPNDGWSP----------VVNGPHQ---PDITTP--------------------------------------------------------------------------ALFLRGRPRLFEYYHGTRFNHLDLLLPAAA-----QMPPPWGVPIEVCDLAGEHFTHHSWVRNEKLVR--------LMCERISTSL
>PKSR BACSU/2234-2511
--RPVFWFHGGVGSGVEIYQQFAQKSQRP---HRDFYGIQARGFM--------TDSAPLHGIEQMASYYIEIIRSIQPEG--------PYDVGGYS-LGGMIAYEVTRQLQSQ-------GLAVKSMVMIDSPYRSETKEN------------EASMKTSMLQTINTM-R--------------------LASIAK-REKFTDVLISREEVDIS-LEDEEFLSELIDLAKERGLNKPDKQ-------------IRAQAQQMMKTQRAYDLESYTVKP---------------------------------------LPDPETVKCYYFRNKSRSFFGDLDTYFTLSNEKEP---------FDQAAYWEEWERQIPHFHLHTVDVDS-SNHFMILTEPKA--STALLEFCEKLY--------
>PKSL1 ASPPA/1866-2104
--KTLFMLPDGGGSSAFSYASLP-RLKSDT---RAVVGLNCPYARDP--------ENMNCTHGAMIESFCNEIRRRQPRG--------PYHLGGWS-SGGAFAYVVAEALVNQ-------GEEVHSLIIIDAPIPQA----------------MEQLPRAFYEHCND--R-----------------SIGLFATQPGA------SPDGSTE-----PPSYLIPHFTAVVDVMLDYKLAP--------------LHARRMPKV------------------GIVWAA------------------------------DTVMDERDAPKMK----------GMHFMIQKRTEF-----------GE-GPDGWDTIMPGASFDIVRADG-ANHFTLMQ-------KEHVSIISDLI--------
>P79068 GLOLA/1938-2183
--KNLWMVPDGSGSCATSYTEIS-QVSSN---HWAVWGLFSPFMK--------TPEEYKCGVYGMAAKFIEAMKARQSKG--------PYSLAGWS-AGGVIAYEIVNQLTKA-------GETVENLIIIDAPCPVT----------------IEPLPRSLHAWFA---------------------SI-------------GLLGEGDDEAAKKTIPSWLLPHFAASVTALSNYTAEP--------------IPKEKCPP-----------------NVMAIWCE------------------------------DGVCHLPTDPRPDPYPTG-----HALFLLDNRTDF-----------GE-GPNRWDEYLDVNKFHRTRHMP-GNHFSMMH-GDYVSQTTLSPYNDDNL--------
>PPSE BACSU/1068-1273
--QNLFCFPPISGSFGIYFKDLALLLNEKAA-VYGFHFIEQDTRL----EGE------PSGIGAVIEQYVNCMTDIQPEG--------PYVLLGYS-AGGNLAFEVAQAMERK------LGLEVSDFIIVDAYLAYLDKEQP-------------LPIDTGNDEIFD--R--------------------SAAYLPEAVR-----------DVDEKVMKKKRNYQEYWAQLLNEGHIKAS--------------IHFIEAG-------------------------------------------------------------------------IHPETSGHTGLTKWEG--ACGN------GE-----YSEYTGFGAHHTKDMLEGTYAEKNA--DI--ILDILEKITSNQ---------
>SRFAC BACSU/1059-1271
--QIIFAFPPVLGSYGLMYQNLSSRLPSY-K-LCAFDFIEEEDRL----EGE------PSGIGAVLDRYADLIQKLQPEG--------PLTLFGYS-AGCSLAFEAAKKLEEQ------LGRIVQRIIMVD---SYKKQGIV-------------SDLDGRTVESDD--R-------------------VEALMNVNRDN-----EALNSEAVKHGLKQKTHAFYSYYVNLISTG-------------------QVKADID------------------------------------------------------------------------LLTSGADFDMPEWLASWEEATTG------GE----VYRVKRGFGTHHTAEMLQGETLDRNA--------EILLEFLNTQT--------
>GRSB BREBE/4207-4446
--RNVFLFAPIGASQGVFYKKLAEQIPTA-S-LYGFDFIEDDDRL----EGE------PSGIGAVIQQYIESMIQTQSDG--------QYVLIGYS-SGGNLAFEVAKEMERQ------LGYSVSDLVLFD--VYWKGDGKV-------------FEQTKEEEEENIKIIME-------------ELRENPGMFNMTREDFEL---YFANEFVKQSFTRKMRKYMSFYTQLVNYGEV--------------EATIHLIQAEFEEEK---------------------------IDEN---------------------------------EKADEEEKTYLEEKWNEKAWNKAAKR------GE-----FVKYNGYGAHHTSNMLGGDGLERNS--------SILKQILQGT---------
>TYCC BREPA/6254-6482
--RNVFCFTPIGVAQSVYYQKLAAEIQGV-S-LYSFDFIQDDNRL----EGE------PSGIGAVMEQYIAAITAIDPSG--------PYTLMGYS-SGGNLAFEVAKELEER------LGYGVTDIILFDAYLSYWDKDKA-------------IERTVAETENDIAQLFA-------------EIGENTEMFNMTQEDFQL---YAANEFVKQSFVRKTVSYVMFHNNLVNTGMT--------------TAAIHLIQSE---------------------------------------------------------------------LEADEEAPLRVAAKWNESAWANATQR------GE-----LLTYSGHGIHHTSRMLAGDYASQNA--------SILQNILQEL---------
>Q51338 PSEAI/2170-2429
--SPLFMFHPSFGSSVHCYKTLAMALRDR----HPVKGVVCRALLGAG-EGE----REVPEWDDMVAEYAEQLLQEHPEG--------VFNLAGWS-LGGNLAMDVAARLEQR------LGRQVAFVGWIDAPAPVRVEAFW-------------N-------------------------EIGPTPEAVP-----------NLSVGEMRVELLGVMFPERAEHIERAWSSICSATTDDE------------QRWTRMSDWAEAEIG-----------AEFATLR---------------SEIAQSN-------------------ELEVSWELKQILDERLKAMDYPRLTAKVS--------E---LWWAARSTNAIQHTRSAVERSMAEAIG-------AERVEPVRVLDTRHDKI---
>ENTF ECOLI/1066-1287
--PTLFCFHPASGSFAWQFSVLSRYLDPQ---HWSIIGIQSPRPN--GPMQT------AANLDEVCEAHLATLLEQQPHG--------PYYLLGYS-LGGTLAQGIAARLRAR------LGEQVAFLGLLDTWPPETQNWQE-------------K------------------------------------EANGLDPE----------VDVDYTRLVVLAEINREREAFLAAQQGSTS-----------TELFTTIEGNYADAVR------------LLTTAH---------------SVPFDGK--------------------------ATLFVAERTLQEGMS----PER-------GE----AWSPWIAELDPH-IYRQDCAHVDIIS-------PGTFEKIGPII---------
>O07944 STRPR/4598-4838
--APLFCVHPAGGSFGWVYSALLRHTDRE---HQPLYALQARGLA-R-P-E-----PLPDDIDAMARDYAEQIRKTVPEG--------PYEILGWS-FGGLVAHAVAARLQAE------LGAEVSLLAVLDGYPD--DAYDG-------------TEHEVGEEQIFD--R---------VLAILLNAAGVD-RAQAFGDA--------------PLQRAAVLEKLRDSGSALGNLDD---------------DAVGRMVTVFLNN-------------TRLIQNF--------------RPRRFTGD--------------------------MVFFAAAAGH--HDPALTP---------------GNWRPYVTGRIEHTEHHLDTDH-AGLAR-------------PEALGAVARTL--
>olmA7|gb|AB070940.1| Actinobacteria - Streptomyces avermitilis Oligomycin T1PKS Thioesterase
--------------SNQELVSMATPLRG----TRDVWSLMLPGFVTGQ--------PVAADVDAAAEYALRLIEELVDGE--------PFVLAGRS-SGGRIAHEVTSRLEDR-------GLAPRGLVLIDSYMAGYDATSY-------------IVPVMESKAVEL---------------------------------------EKDFGQMTGTRLTAMAAYFG--MFEHWQP--------------------KEIATP--------------------------------------------------------------------------TLLVRASECYG-------------IEPGEVQPPAEQWQAAWPLPHEAIDVPGNHYTMLEGNGD----VTAAAVHEWL---------
>npsP5|gb|HQ287563.1| Actinobacteria - Streptomyces sp. DSM 5940 Napsamycin NRPS Thioesterase
---ALVCVPYEAG-NALNFEAMARALSAAD---VAVYAVELPGHDFARPDE------ELAGVDRVAGPLTREILDRIE---------LPVALWGHG-AGVALALETARSLREA-------GAPPRHLFLAAGIEREPTDGGPAGGGTAAAGSTDIGA-------------------------------WLRDAGALTDVDQSRSSRGELIERAYRHDLREAERYLGAFSG--------------------------------------------------------------------------------------------------TLDLPATIVAIP------------------------------------------AAPGEGEATARC---------------------------
>pacP|gb|HM855229.1| Actinobacteria - Streptomyces coeruleorubidus Pacidamycin NRPS Thioesterase
---ALVCVPYEAG-NALNFEAMARALSASD---VAVYAVELPGHDVARPDD------ELVGLDRIAGRLSQEIRDRIE---------IPVALWGHG-AGVALALETGRSLQAA-------GVPPRHLFLAAAEQREATDREPA-----AAGSADVGA-------------------------------WLRDAGALTDVDQWRSTRGELIERAYLHDLGEAERY-----------------------------------------------------------------------------------------------------------------------------------------------------------------------------------------------------
>ambH|gb|DQ897667.1| Proteobacteria (Delta) - Sorangium cellulosum Ambruticin T1PKS Thioesterase
---RLVCFPASGG-SAGDFAEWAKVMPDD----CELVAVEYPGSGARQLES------CEHPLAALTLQAAGALMAMPR---------VPLVLFGHS-LGGLIAHATAVELERH-------AMGPSCVVLSNPANVITVQRDLP-----------------------------------------------RDGFRDQKFLTWLARSTGISIEPEATDSDATRQFLKTFGEQLAWTFDFDLG--------------WRVSCP-------------------------------------------------------------------------VIISCGRDDTTLHAES-----------------LEFWRRSGGDLEEWTFAGAHDYIRQEFA-------EIVSKIMTTT---------
>pedH|gb|AY328023.1| Unknown - symbiont bacterium of Paederus fuscipes Pederin TRANSATPKS-NRPS Thioesterase
---PWFCIHAAAG-NVLCYRELAECLGIE----RPFYALQAPDAVGGGHP---------GSIVGLAALYVRAIRIFQP--WG------PYFLAGWS-MGGVVAYEMAQQLLQA-------GEQVEVLALLESYTPEAIR----------------SLERKALGLS---------------------AESDDRMDKLLRTFAVELGIGETPWELSAVDLAQGLEWILKRLEGSNLSTASFDLEQLHKLFRLYEANLNALDRYRLQPYS-------------------------------GRVVLIYADQTQ---------------------------QIDADEAQHLGG-------------------WQPWLRSGHCRSATIVGDHYSILQRPQ---------VVQLAKVLTAL------
>epoE|gb|AF210843.1| Proteobacteria (Delta) - Sorangium cellulosum Epothilone T1PKS-NRPS Thioesterase
---RLFCFHGSGG-SPEGFRSWSE--KSEWS-DLEIVAMWHDRSLASEDAP------GKKYVQEAASLIQHYADA-------------PFALVGFS-LGVRFVMGTAVELASRSG----APAPLAVFTLGGSLISSSEITPEMETDIIAK----------------------------------LFFRNAAGFVRSTQQVQADARADKVITDTMVAPAPGDSKEPPVK-----------------------------------------------------------------------------------------------------IAVPIVAIAGSDDVIVPPSDVQD-------------------LQSRTTERFYMHLLPGDHEFLVDRGREIMHIVDSHL--------------
>MXAN 3932|gb|CP000113.1| Proteobacteria (Delta) - Myxococcus xanthus DK 1622 Antibiotic TA TRANSATPKS-NRPS-T2PKS Thioesterase
---PIFWFHGGMG-GVEVYRALSQEIRRP------FLGIQARGWM--------SQEAPIAGIEAMASYYVDILLAAQPEG--------PYELGGYS-LGGMLAYEVTRQLQER-------GARVASIVMLDAPDSTHLDVF------------QFSRRTATFQAVNTA---------------------LFSSIAHHPERLEQTLIHRDEVEAD-LDDTALLRQLMGLAQSRGLSKDENQ-------------VRFMVEQNARVHAAYDVGRFRLKP---------------------------------------LLRPEEVAVFYLRNGSCSFFGNLEPYLTLTPGELT---------FDGTNYWAEWERFLPRMQI--LEVAS-SNHLMLLAEPAV--QRVIAGFC------------
>PA2399|gb|NC 002516.2| Proteobacteria (Gamma) - Pseudomonas aeruginosa PAO1 Pyoverdin NRPS Thioesterase
---PLFMFHPSFG-SVHCYKTLAMALRDR----HPVKGVVCRALLGAG--------REVPEWDDMVAEYAEQLLQEHPEG--------VFNLAGWS-LGGNLAMDVAARLEQR-------GRQVAFVGWIDAPAPVRVEAFW-------------N-------------------------EIGPTPEAVP-----------NLSVGEMRVELLGVMFPERAEHIERAWSSICSATTDDE------------QRWTRMSDWAEAEIG-----------AEFATLR---------------SEIAQSN-------------------ELEVSWELKQILDERLKAMDYPRLTAKVS------------LWWAARSTNAIQ--RSAVERSMAEAIG-------AERVEPVRVLDTRHDK----
>rhiF|gb|AM411073.1| Proteobacteria (Beta) - Burkholderia rhizoxinica Rhizoxin TRANSATPKS-NRPS Thioesterase
---PIFWFHGALG-GTEIYQELAHHIDRP------FFGLQAKGWM--------TEREPLQGIEAMAAYYVQAIQSVQPQG--------PYDLGGYS-LGGMLAYEVTRQLQES-------GEAVTTLVMLDSPDVTGERTA------------KLADKTRLLQAVNMS---------------------LQMTISDTPERFAEVLIHRDEIDLS-LSHQEYRQQLMTLARQRGLKISDDR-------------LQQMMEQVARIQQSYQVEHYQILP---------------------------------------LPKAEEVACYYFRNASGLWMGDLEPYFSTDSQEFAA--------FNHTNYWQEWQRQLPSFEM--IEVNS-SSHMTLLTEPEV--FDVIAEFC------------
>dszC|gb|DQ013294.0| Proteobacteria (Delta) - Sorangium cellulosum Disorazole TRANSATPKS-NRPS Thioesterase
-----FWVHGAPG-LAQPLYPLSAALGTD----YPFFAFQARGVDGLAMPF--------TSIEEIAAHYVACLRQRSP--RG------PYVVGGLS-SGGIIAFEMARQLLSQ-------GERVSRLVMLDTYPAVAGLAQE-------------TPGDIDPILP---------------------LLLMANSFISFDRD-GDTAIKPDDLAGLPPPMQLPRAVQLIKERSRTALSRDQIYRMLNGNIAVYKHLDLACRKYQPGVLDA------------------------------VDVLFFKAEKGFFG-----------------GANPLGLPILDVFSSYDYVTP-------------------WRQWIRGGLQVVELPCAHVDLLEPPA---------LHQVVAHVREAL-----
>ABK51302.1|gb|EF032014.0| Proteobacteria (Gamma) - Candidatus Endobugula sertula Bryostatin T2PKS-TRANSATPKS Thioesterase
---NTFWIHGGSG-EVGVYMDIAKHLQTSDF-KM--IGIQARGFLMPN-------APPLNNLVEMARYYSKMIVSVDPIG--------PYHIIGFS-MGGAITYEVGRQLQLA-------GKTVNTLVMVEPPVCNDNQYAD---------LFNVSKRENFLANANFLLL------------------VTL---------------YLDRDFSE-KLNTGEINWDTYMIVEEDV-------------------------------------------------------------------------------------------------------------------------------------------------------------------------------------------
>sorB|gb|U24241.0| Proteobacteria (Delta) - Sorangium cellulosum Soraphen T1PKS Thioesterase
--QLICFPAFVVPSAPIQYARFASHLRD----RRDIWFIPHPGYRHKT--------PLTRSLDELVSSHARTTLACARNS--------PFVLFGHS-SGGNIAHMVAEHLESI-------GHGPAGVVLLDSYDY---ASPA-------------VEAGLKIFHVEQ---------------------------------------LQTWG-ASDAGLTAEAWYYEHIGLETWKP--------------------RQLAAP--------------------------------------------------------------------------TLHVRATEPMK-------------QFVGSEGAPAE-WRASWKLPHVAIDAPGDHATVVDHP------FLAQAVDDWL---------
>nysK|gb|AF263912.0| Actinobacteria - Streptomyces noursei ATCC 11455 Nystatin T1PKS Thioesterase
---LIFVSAPGATGGVHQYARIAAHFRG----SRHVSALPLMGFA----PGE----LLPATSEAAARIVAESVLMASEGE--------PFVMVGHS-TGGSLAYLAAGVLEDT------WDVRPEAVVLLDTASIRYNPGEG-------------NDLDRTTRFYLADI-------------------------------------DSPSVTLNSARMSAMAHWFMA--MTDIQA--------------------PAPTAP--------------------------------------------------------------------------TLLVRAA-----RALDG--FRLDTSSVPAD---------------EVRDIDADHLSLAKEHSA----LTAQAIEGWL---------
>cndF|gb|AM988861.1| Proteobacteria (Delta) - Chondromyces crocatus Chondrochlorens T1PKS-NRPS Thioesterase
---PFFCVHPVSG-SVVCYVDLARRLGQD----RPFYGLQSPGLQGERAPS--------DDVHEMATLYLEAVREQQP--RG------PYLLGGWS-MGGCIAFEMARRLQEE-------GETVALLALIDSHAITSID----------------LPDGIDDTTL---------------------VSLLLFDLARQ----AGIALPSWDDDLAHAEPSERPAFLLDRARHAGLLPADLDQASLDQMLQVFRANLVAHCRYAPRPAP-------------------------------LRATLLCGNDPR---------------------------GWSTGSPDLGWT----------------------ELALGGLTLDVLPGDHYSLLTAQG----------DLLASRLRARL-----
>spiJ|gb|AM407731.1| Proteobacteria (Delta) - Sorangium cellulosum Spirangien T1PKS Thioesterase
--GLVCLPSFYPPVS--VYTRFAAALRG----ERDVWLLPPPGYA----RGE----HLAPDMPALIEHQAAAIVRSTAGS--------PFAIVAYS-SSGWLAYATASCLESK-------GSSPRALVLLD------HVDQS-------------IPRELGHQIWR-EWVDF------------------------------------PVPARDDVEMSALGHYVKL--PQAETP--------------------AQIAAP--------------------------------------------------------------------------ILLVRPATLSATDVWP-----------------PHWRAP-----EAVVEVPGSHSTMLVTHAE----STARAVHEWL---------
>AAS98787.1|gb|AY522504.1| Cyanobacteria - Lyngbya majuscula Jamaicamide T1PKS-T2PKS-NRPS Thioesterase
---PIFLLHAVGG-TVYMYRDLARYLGSD----IPVYGIQSSVLDGKTELP--------TSIEEMATEYIKAIRTIQP--NG------AYFLGGAS-LGGTVAFEMAQQLHAE-------GEKVALLAMIDTPGPGNM----------------------GVKLV---------------------DEQEIAAYILNTLFELDKSLFSFNSFPQVGNIEEQVMSALEQAKIANLLPNNFQIPQTRQIIRLFKANMEAMWNYKP-RIYP------------------------------GKIIFFRAQ------------------------------DRREKYDPIHPEY------------------PWIELAASGIEIHPVSATHVTMNYDPH---------VQVIAEKLK--------
>mcyC|gb|AF183408.1| Cyanobacteria - Microcystis aeruginosa PCC 7806 Microcystin T1PKS-NRPS Thioesterase
---AVFLFPPALG-FAAAYANLAEYITDY-A-LYTFRYISDELM---------------------LEKYAELIEDLAQDQ--------DIKLMGHS-AGGFLAMLMAQQLESR-------GRVVSDVILLD---TYRGGREA-------------KKADMSEIQEG------------------------VDAFLLNPKRQELRGYFLGNQKLRDRTYHQVWEYFNFLWNSDLKN--------------------VQIQGT-------------------------------------------------------------------------IHLIRAEGNYEARDDWTQATKGE------------RINHYATGIH--REMID-----------------------------------
>amphK|gb|AF357202.1| Actinobacteria - Streptomyces nodosus Amphotericin T1PKS Thioesterase
---LIFVSAPGATGGVHQYARIAAHFRG----KRHVSAIPLMGFA----PGE----LLPATSEAAARIVAESVLMASDGE--------PFVMVGHS-TGGSLAYLAAGVLEDT------WGVKPEAVVLLDTASIRYNPSEG-------------NNLDQTTRFYLADI-------------------------------------DSPSVTLNSARMSAMAHWFMA--MTDIDA--------------------PATTAP--------------------------------------------------------------------------TLLLRAT-----QANNG--FMLDTSAVPAD---------------VVRDIEADHLSLAMEHSD----LTAEAIENWL---------
>ADA82585.1|gb|FJ823461.1| Unknown - uncultured bacterium psy1 Psymberin TRANSATPKS-NRPS-T2PKS Thioesterase
---RLYCFPYGNQ-SGAMYRNWVRAFPQA----IEVQPIELPGRGSRLKERP------FESIQRLVETLTKVLDEELER---------PFAVFGHS-IGALIGYAWCLHLAKS-------GRALPQHLIVSAYTCPTMENPM-----------------------------------------------LADMKLAYREACGLQTLPSVDDIAAPANEALVSRLVSVAQAGIVNMGLGDR---------FASATPELIRTQLVNG------------------------------------------------------------------IATLQLVDGFDAASAVPLVVPLTALHG----------ERDEQVSSEEMSAWGALTTGAFACKAFPGNHVFVDPSQCEADVMHEIIRLL--
>lkmAIII|gb|AB088224.2| Actinobacteria - Streptomyces rochei Lankamycin T1PKS Thioesterase
---LICVAGTAPVAGPHEFLRLAAAFEG----SMPVSALPQPGYE----PGE----QLPASLAAVLGVQADAVLKSADG---------PFVLVGHS-AGALMAHALGAELADR-------GRPPHGIVLIDVYPP---GRQQ-------------AVQGWLAEL-------------------------TDTMFGREG--------VRVDD----TRLTALGAYHRF--TSTWQ--------------------PRDLAVP--------------------------------------------------------------------------TLLVRACEPLGEWP---DGTS-------------WQSTWPFPHT--CVDVPGNHFSMVQ--EH--AGAVAERIRTWT---------
>vlm2|gb|DQ174261.1| Actinobacteria - Streptomyces tsusimaensis Valinomycin NRPS Thioesterase
----IVFAPPAGG-TVLGYIELARHLKGFG----EIHGVEAPGLGAGETP-------VYPSFEEMVQFCSDSAAGVAGDG---------VYIGGHS-LGGHIAFYLATMLLDR-------GIRPKGLIILDTPPRLGDIPVAD------------------------------------------ADLTEEETKVFILAMGIGGMLDQDRDALKDLPYEEAKQLLLDRAKNDPRVSAFLSEDYLDRFLRLQMHQLMYSRDVVLPQRKLDIP--------------------------------------------------------------IHVFRTKNHAPEVARLFS-----------------AWENYAAGEVTFVDIPGDHATMLRAPH---------VSEVAQLLDRHC-----
>eryAIII|gb|AY623658.0| Actinobacteria - Aeromicrobium erythreum Erythromycin T1PKS Thioesterase
---LVCCAGTAAPSGPHEFARLAAALDG----SWSVLGLPQPGYL----AGE----PLPASMEALAAAQAATVLRAVAAR--------PVVLVGHS-AGGLMSHALATALTQQ-------GHRPDGVVLLDSYPP---GRQD-------------AVEGWIDVL-------------------------TRRLLDLET--------VPLDD----TRLTAMGAYDRM--LGGWV--------------------PDDQQVA--------------------------------------------------------------------------TLLVRAVDPIAAWP---DDD--------------WRASWPFAHA--TADVPGDHFTMMQ--EH--AGQVAARITDWW---------
>aurC|gb|AJ575648.0| Actinobacteria - Streptomyces thioluteus Aureothin T1PKS Thioesterase
--KLICFPTFAGGSGAHQYARLAAVSGG----ERDIWVLPAPGFT----WQE----SLPASVETLARLQADSVEACADGG--------PVVLLGYS-AGGWIAQATATALQE-------RGIAPAAVVLLDSHRPD-SAMLP-------------HLHAHIDGAREDV-L------------------------------------WTAGTG-DDAYLTAMAHYAHL--FHTWTP--------------------KETGTP--------------------------------------------------------------------------TLLVRASDRP-------FDE------APT------DWQPHWPLPHTAVDTAGTHFSIIREHSG----PTLQAVHAWL---------
>nidA5|gb|AF016585.0| Actinobacteria - Streptomyces caelestis Niddamycin T1PKS Thioesterase
---LYCCAGTAATSNPREYAHFADALRGR----RDVTVLPLPGFG---DPAE----PLPASLDALLADRADALLEHCGGE--------PFALAGHS-AGANVAYALAAYLESR------GSG-PAAVVLMDMYFP---DDPG-------------AMGVWRDDL-------------------------LRWSLERSP--------VPLAE----HRLTAMAGYHRL--LLGSH--------------------FTALRAP--------------------------------------------------------------------------VLLARASEPLREWSGDDGPDG-------------WRSRVPGVTS--VTDVPGNHFTMLT--EY--AADTASAVHDWL---------
>AAZ94391.1|gb|DQ149987.0| Actinobacteria - Streptomyces neyagawaensis Concanamycin A T1PKS Thioesterase
--ELVCFASVVALGGAHQYSRLASAFEG----RYGVSALDAPGFA----PDE----PLPADMSSLLDFQTEVLLRRLGDR--------PKVLLGSS-SGGTLAHAAAARLEA-------LGAGPAAVVLLDTYLSGDE-AMT-------------QFDDVLVSGMFERE--------------------------------------DRAAPMDGTRLTAMGRYFQL--LDDWVP--------------------PPVEAP--------------------------------------------------------------------------VLLVRASSPL-------A-EPA--PDSDI------DWRASWPSAHSVLDVPGNHWSMMEQHLK----TTVDAVSGWL---------
>crpD|gb|EF159954.0| Cyanobacteria - Nostoc sp. ATCC 53789 Cryptophycin T1PKS-NRPS Thioesterase
---PLFCVPGAGG-NVLYFHHLAQYLGNN----QPLYGLQAQGLDGETEPH--------KSVEEIASQHIKAIQTVQP--VG------PYFLAGHS-FGSHVVFEMANQLQLI-------GKSVAYVGILDTPAPTSQANHQ-------------NDFSN--WDN---------------------AKWICRMAEVIEDIVGENLFLSYETLTSLTW-EQQLNYFKQKLEIVGFLPAQTDIKIVRGLLQVFQTQ--CQIKYEPEKTYK------------------------------TPITLFCAREINP-------------------------EQESYSHIFQEPTW------------------GWNQFSDGEVEIHIVPGNHVSMLSEPH---------VKVLAQQMQI-------
>fscF|gb|AY310323.0| Actinobacteria - Streptomyces sp. FR-008 FR-008 T1PKS-NRPS Thioesterase
--RLVCVSAPTANGGVHQYATLSGHFRG----RRDVTALPLIGFN----TGE----ALPAHAEAAARIIADCTLQAADGK--------PFVLVGHS-SGGSLAYAAAGVLEHT------WGIRPEAVVLLDTLSIQHKSDEG-------------VDYNGMMKFNFTAV-------------------------------------DDSPVRLTNSRLSAMGRWMVL--LNALDV--------------------HPTTVP----------------------------------------------------------------------------------------------------------------------------------------------------------------
>mtaG|gb|AF188287.1| Proteobacteria (Delta) - Stigmatella aurantiaca DW4/3-1 Myxothiazol T1PKS-NRPS Thioesterase
---PLFFMHPTGG-DVLCYAPLARQLGPR----QPFYALQA---VVDQEA---------ESIEAMAARYLEEVRKVRP--KG------PYRLGGWS-TGGILAQAMARQLEEA-------GEQVELLMLLETWSPTVYQ----------------RSEGTTALMA---------------------WFATDLLGGAG-------AAQLEASKLETLDEAAQLDYLFERASASGALPG-VERSEMEQRFRIFAKTARALSRYQSDAYR-------------------------------GKVLFLQAEEAA---------------------------TPTAGTLPEPQAS------------------WGQSLEQ--VQMYRMPGNHYTMLQSPH---------VRAVADRM---------
>herD|gb|JN671974.1| Actinobacteria - Streptomyces chromofuscus Herboxidiene T1PKS-T3PKS Thioesterase
--GLFCFPSFLAIAGPQQYARFAAAFRG----VREVTVLPEPGFT----DGG----PLPADVGALVALHAETVRRHAGPT--------PYALLGHS-SGAMIAYAVAARLEE-------LGAPPRAVVLLD-VVPTDVHALP-------------GFQSDLAAGLRERDG-------------------------------------DAASLD-DQRLTAMGGYVRA--FATWEP--------------------AEISVP--------------------------------------------------------------------------TLLVRAG--------------------EN------HWSSAWPHPHTAVDAPGDHFTMLEAHAG----ETARLVQEWL---------
>ADC79620.1|gb|GU390405.1| Actinobacteria - Streptomyces lohii Bafilomycin T1PKS Thioesterase
--VLVCFGSVVALGGAHQYARFAARFRD----RYAVAALDAPGFT----PEE----ELPADMAALLDFQATTLLRELPGR--------RLVLAGSS-SGGTLAHGVAAALEQ-------RGEGPAAVVLLDTYLSDNQ-GIT-------------QFNDVLLGGMFARE--------------------------------------DRAAPMDGTRLTAMGGYFRL--LDDWTP--------------------PAVRAP--------------------------------------------------------------------------LLLVRASTPL-------G-SPS--AEAG-------DWRSSWAGADTVLDVPGDHFSIMEEHVA----TTGDAVADWL---------
>borA6|gb|AJ580915.1| Actinobacteria - Streptomyces parvulus Borrelidin T1PKS Thioesterase
--PLFCIPSHLGKADPHKFLRFAAALRG----RRDVFVLRQPGFV----PGQ----PLPAGLDVLLDTHARAMAGHDRP-----------VLLGYS-AGGLAAQALAARLAE-------LGRPPAAVVLVDTYAPDETEVMA-------------RIQGAMEQGQRDRDG------------------------------------RTGAAFG-EAWLTAMGHYFG----FDWTP--------------------CPVDVP--------------------------------------------------------------------------VLHVRAGD------------PMTGMPVEG------RWQARWNLPHTAVDVPGDHFTMMEDHAP----RTADTVHDWL---------
>jerE|gb|DQ897668.0| Proteobacteria (Delta) - Sorangium cellulosum Jerangolid T1PKS Thioesterase
---RLFCLPYAGA-GASRFRAWPELLPSW----VEVCPIQLPGREERLHEP------AFETMDALVDALVPAVEAHIDR---------PFALFGCS-MGALLAFELARALQSR------HRLVARHLFGAASSSPRRVSPVREQLSAVVSPGTVR----------------------------SDAMASLRQLGLLSSSSLQDEEMLDEVWPAFRADLSLTLKYTCRDAT--------------------------------------------------------------------------------------------------PLDAPISVFGGTEDRTVGREDLVA-----------------WHTLTKDAFQ--VAMLPGGHLFMDATPKRLFHHIEHAL--------------
>pldAIV|gb|AB435553.1| Actinobacteria - Streptomyces platensis Pladienolide T1PKS Thioesterase
--TLLCFSAIVALAGSHQYSRFASSFRE----ERDVSVLYAPGFF----AGE----LLPTSLETVIDTQVETVRQQAADG--------PVVLVGAS-SGGWLAHAAAARLEA-------LGTPPAAVVLLDTYLPDDQ-FLA-------------RDQDRFIGGVFDRQ--------------------------------------DRFSIREDVSLSAMGWYLHL--FDGWKP--------------------TAISVP--------------------------------------------------------------------------ELLVRASEPL-------P-SPSGRPPRAA------DWRTSWHVAQHSVEVPGDHFTMLEEFND----ATADAVRRWL---------
>PSPTO 4687|gb|NC 004578.1| Proteobacteria (Gamma) - Pseudomonas syringae pv. tomato str. DC3000 Coronatine T1PKS-NRPS Thioesterase
----------LPARANLTYQRLGRELKG----HYDMATLPLPGYD----NG-----PLPASAEAVAVALAHAVEACAAGR--------PFTLLGFS-TGGLVAYAVAELLQQR-------GIHPAALCLIDTYPPAAMRSAV-------------LKEVLSDWLESR----------------------------------------SDFWSTDDDGLSAMAYYLEL--FGRWSP--------------------LPLEAP--------------------------------------------------------------------------VLLLQAEQASAAGAS-------------------DTWPQLWPRLTQVVKTSGRHFALLSDEVQ----QTAQHLIL-----------
>PSPTO 4699|gb|NC 004578.1| Proteobacteria (Gamma) - Pseudomonas syringae pv. tomato str. DC3000 Coronatine T1PKS-NRPS Thioesterase
---PLFLIHEGSG-DIGYAQQLAKQISSD----IPVYGFSASGLQIGEE--------HLTTIEAMASRYIQGIRHIQPDG--------PYRVAGWS-AGGTIAYEIAHQLIGA-------GATVEFLGLIDTTS----------------------------------------------------------------------------------DYRHLFN-----------------------------------AQEVEH---------------AHP----------------YETPEIEAL--------------------------LRLLSPD--ARHGAVSHLAAARD-------------FEALLAYTQVQG-LLPEGIDSDLAKR-----------------YLAL-----
>AAK81827.1|gb|AF386507.1| Actinobacteria - Streptomyces lavendulae Complestatin NRPS Thioesterase
---PLFCLHPSMG-LSWSYAALVPYLPAD----LPVYGVQARGLAGPEE--------LPHSIEEMAADYTDEIRTVQPEG--------PYHLLGWS-FGGMIAQAIACRLEEL-------GEEVALLALLDAYPSSAG-------------------------------------------------------KSISR--------------DRGVSREEQASTLMEQEIEVSAGVDARG--------NLGDRVLSRMQEVLGNM-------------ARFAPGH--------------TPRRFGGD--------------------------VLLFIAAHDR--PEELPAA------------EARAGWDDFTGGTVES--HEIPVDH-YRMLH------PGNLPPVGRV----------
>teiD|gb|AJ632270.1| Actinobacteria - Actinoplanes teichomyceticus Teicoplanin NRPS Thioesterase
---PLFCIHASGG-LSWNYGPLLRHLPPN----QPVYGVQARGLARTEP--------LPGSVEEMAADYVEQIRTVQPTG--------PYHLLGWS-LGGRIAQAMAVLLEAD-------GEKVGLLALLDAYPVYMG-------------------------------------------------------RKATGTVT-----------EEAARDEDALERRKQQELELAGQLVQ------------GAGARSRLEAVMRNL-------------WEVGPAH--------------TASPFASD--------------------------VLLFVASVDR--PAHLPVS------------EAIASWKD-----FTG--GTIATNH-YEMVQ------PAALAQIGAIVAEK------
>vcm4|gb|HQ679900.1| Actinobacteria - Amycolatopsis orientalis HCCB10007 Vancomycin NRPS-T3PKS Thioesterase
---PLFCVHASGG-LSWNYEPLLRHLPSN----QPVYGVQARGLARTEP--------LPGSVEEMAADYLAQIRAVQPEG--------PYHLLGWS-LGGRIAQAMAKLLEEE-------GEKVGLLALLDAYPVYMG-------------------------------------------------------RKTTG----------------AASEEEALSKRNQADLDLAGQLVK------------GEAARARLEAVMRNL-------------WDVGPRH--------------VSSPFAGD--------------------------ILLFVATVDR--PEHLPVS------------VAKASWKDFTSGTIET--HDVPSNH-YDMVQ------TAALGQIGAIVAE-------
>pikAIV|gb|AF079138.1| Actinobacteria - Streptomyces venezuelae Methymycin T1PKS Thioesterase
-----GCTGTAANGGPHEFLRLSTSFQE----ERDFLAVPLPGYGT--GTGTG-TALLPADLDTALDAQARAILRAAGDA--------PVVLLGHS-GGALLAHELAFRLERAHG------APPAGIVLVDPYPP---GHQE-------------PIEVWSRQLG-------------------------EGLF--AGELE------PMSD----ARLLAMGRY-AR--FLAGP-------------------RPGRSSAP--------------------------------------------------------------------------VLLVRASEPLGDWQ---EERG------------DWRAHWDLPHT--VADVPGDHFTMMR--DH--APAVAEAVLSWL---------
>plm7|gb|AY354515.1| Actinobacteria - Streptomyces sp. HK803 Phoslactomycin T1PKS Thioesterase
----ISFPPFAPVEQTLQFVRLASFFRD----RRDLSMVTVPGFL----KGE----PLAESVDVLIDVLAESAIHCAAGS--------PFALLGYS-SSGWLAHCVTARMEA-------LGTPAQGLVLLDTYLP--DGMSV-------------ALRQAMTYEVNE--R------------------------------------RSRFTKLNFTTITALGTYRRM--FRGWAP--------------------QPVSTP--------------------------------------------------------------------------TLFIRPEECI-------PGDPGLP-PLTG------EWRTHWPLPHTDATVPGDHCTIVAENAD----ATAALVHDWL---------
>pimS4|gb|AJ278573.1| Actinobacteria - Streptomyces natalensis Pimaricin T1PKS-NRPS Thioesterase
--RLICVSTPTANGGVHEYARLAASFRG----ERHVSALPLVGFA----TGE----RLPATAETAVRVIAESALRASDGN--------PFVLVGHS-SAGAFAYLAAALLENT------WGIRPEAVVLLDTLSLRHEQNES-------------IDYAGLMRRHFMVD-------------------------------------EVSPVRMTNSRLSAMARWMGM--LNQLEV--------------------RHTTVP--------------------------------------------------------------------------VLIIRAT-----KETFG--IGTDTGIYGEDH---------GS-PVDVRSVDADHFSMVRDDAP----ETARIVREWL---------
>simC1C|gb|AF324838.2| Actinobacteria - Streptomyces antibioticus Simocyclinone T1PKS-T2PKS-AMINOCOUMARIN-NRPS Thioesterase
---LVCTVAPVAPLTDAAYSFLASALPE----PRDVWTVRPPGFG----EGE----PLPATLTDLFEAQRRALVEQLDGD--------AIVVVGYS-SGGWLAHGLAAHLEAA-------GRPAAAVVLFDVYLPVSQLDTV-------------WTRFLQEQASRSGTLSG------------------------------------GRSATLSNELSAMGGYHGL--FDGWRP--------------------GRISAP--------------------------------------------------------------------------TLHIRASEALPGLSLP-----------------APDAMFPPELCHSSASLPGNHFTMLSQHSE----AAAKTVNDWL---------
>pks2|gb|FJ952082.1| Actinobacteria - Streptomyces nanchangensis Meilingmycin T1PKS Thioesterase
--ALVCVTSAVGTSDPVQYARLAKPFQG----ERDVWALRQPGFHR--GD------QLPRTPETLLETHAASLRAELGER--------PFVLAGLS-SGGLIAHMLARYLYDQG-------APPAGVILLDSYAP---GEDE-------------RLALLAPGLR-------------------------GELQHRADDPD--SAAVPSDD----SWVTAMLHYETF--DWPFT----------------------ELPAP--------------------------------------------------------------------------VLFVRAGEPLESWP----------------ADWDWQPVWPYDHT--AVITRGNHFTMLE--EH--APHTAALMRDWM---------
>meiA4|gb|FJ952082.1| Actinobacteria - Streptomyces nanchangensis Meilingmycin T1PKS Thioesterase
--VLICLPTVAAISSAYQYSRFASALQG----LRDVWYAPAPGFL----VGE----LLPADVDAVTHLFAEAVLRFTEGA--------PFALAGHS-AGGWLTYSVTSHLES-------LGVRPEAVVAMDAYLP--DEGIA-------------PVASALTSEIFD--R------------------------------------VTEFVEVDYTRLTAMGGYFRI--FSGWTP--------------------PQIDTP--------------------------------------------------------------------------ALFIRGRD-------------------GE------QSPPVWGVPHTVMDVAGDHFTMLEEHAG----ATARHVDQWL---------
>zmaQ|gb|FJ430564.1| Firmicutes - Bacillus cereus Zwittermicin T1PKS-NRPS Thioesterase
---QWFIVHGQGG-GILNYYDLARELGED----KTVYGLQSIGYDDSRFPN--------LSVEEMAVRYIEEIKQVKKEG--------PYTLLGWS-FGGIVAFEMAKKLEEL-------GDKVSFLGLLDVHPIEQGKEILS---------------------------------------------LNIKNAFEELEKFNDQLGIEKISFEQMSEEQLIESLLKKFKLNENSCQQNFEDPMMNKLKVMIANRYAYLKYNCKQKIKAD----------------------------------------------------------------IFLFNASINDIHPLVDYN-------------------RWNEYTSGEVYALQVPGSHLSMLEKP-------HIHELVKSIKKSF-----
>ttmH|gb|EF990140.1| Actinobacteria - Streptomyces spiroverticillatus Tautomycin T1PKS Thioesterase
--HLICVCPTVMTTGPQVYLRFAAELTG--R-GNQVSALVPPGFAA----GE----LLPATRAALVTGLADTVEEFVGET--------EFSLAGHS-SGGVVAYELAQELHAR-------GLAPAGLVLLDTYTLNLKGERG-------------VFDDEALQHALNTRLVEYVR--------------------------------RMGFGTLSERITAQLWNLDL--LRGWRP--------------------EGISVP--------------------------------------------------------------------------SLYIRSTQALAHGQGD------------------EWRDEVAAAADSVVEVPGDHFTMLEPEQVS---STARAVGEWL---------
>chmGV|gb|AY509120.1| Actinobacteria - Streptomyces bikiniensis Chalcomycin T1PKS Thioesterase
---LICCAGTAVASGPEEFTALAAALGDR----LTVSALRQPGFR----ANE----LLPGSLDGLLDAQADAVLRHTGDR--------PYALLGHS-AGGALAHALACRLEELG-------AGPAALVLADVYLP---SSPG-------------AMGVWRNEM-------------------------LDWVMRRSV--------VSIDD----ARLTAMGAYNQM--LLEWT--------------------PRPTKAP--------------------------------------------------------------------------VLFLRATEPVRPWSGEP---------------ESWRAHWDGGDHT-AVDVPGTHLTLMT--EH--ARHLAATLHTWL---------
>albIX|gb|AJ586576.1| Proteobacteria (Gamma) - Xanthomonas albilineans Albicidin NRPS-TRANSATPKS Thioesterase
---AVYAIHPIGG-QIHCYIDLAAALGHS----ARVYGLQCEPVRR------------FAHLSDLAAHYCDALLAGPTGA--------PYRLLGWS-SGGVLALAVAEQLQRR-------GLRVDYVGLLDSSLIPVHAREP-------------------------------------------------------------------RQLTFVAALNTLAALAKRGFEQAEIDEAR------------------------------------------------------------------------------------------------QLLFADGDDE-------------------------HVFDYSRHQASLDKLLAHLRFTLESR--------------------------
>srfA3|gb|X70356.1| Firmicutes - Bacillus subtilis Surfactin NRPS Thioesterase
---IIFAFPPVLG-YGLMYQNLSSRLPSY-K-LCAFDFIEEEDR---------------------LDRYADLIQKLQPEG--------PLTLFGYS-AGCSLAFEAAKKLEEQ-------GRIVQRIIMVD---SYKKQG-V-------------SDLDGRTVESD-----------------------VEALMNVNRDN-----EALNSEAVKHGLKQKTHAFYSYYVNLISTG-------------------QVKADID------------------------------------------------------------------------LLTSGADFDMPEWLASWEEATTG------------VYRVKRGFGTH--AEMLQGETLDRNA--------EILLEFLN-----------
>disC|gb|AJ874112.1| Proteobacteria (Delta) - Sorangium cellulosum Disorazole TRANSATPKS-NRPS Thioesterase
-----FWVHGAPG-LAQPLYPLSAALGTD----YPFFAFQARGVDGLAMPF--------TSIEEIAAHYVACLRQRSP--RG------PYVVGGLS-SGGIIAFEMARQLLSQ-------GERVSRLVMLDTYPAVAGLAQE-------------TPGDIDPILP---------------------LLLMANSFISFDRD-GDTAIKPDDLAGLPPPMQLPRAVQLIKERSRTALSRDQIYRMLNGNIAVYKHLDLACRKYQPGVLDA------------------------------VDVLFFKAEKGFFG-----------------GANPLGLPILDVFSSYDYVTP-------------------WRQWIRGGLQVVELPCAHVDLLEPPA---------LHQVVAHVREAL-----
>apoS8|gb|JF819834.1| Actinobacteria - Nocardiopsis sp. FU40 Apoptolidin T1PKS Thioesterase
---VVCFASPMAEQSPYQYTRFAGALRR----LRDVSVLLSPGFV----AEE----LLPATLDDVVEAQADAVLRAASDA--------PVVLVGHS-SGGWFAQAVASRLES-------IGNGPAAVVLVDTILPR-HEVVR-------------SIRSVWADNQLE--R------------------------------------EQQAGQYDHVQLTSMAAYTDL--FLEWRP--------------------EKISAP--------------------------------------------------------------------------TLFVRALTPP-------VPGETEA--ETE------ALRTSWELEHTAADAPGDHWSMMDEFAG----ATAQVVEEWL---------
>dptD|gb|AY787762.1| Actinobacteria - Streptomyces roseosporus NRRL 11379 Daptomycin NRPS Thioesterase
---PLFCVHAGMG-LSWAYAGLLSHLDAD----VPVYGLQARRLT--------APGGLPGSVEEMAEDYAGEIRRLCPDG--------PYRLLGWS-FGGTVAHAVATRLQQQ-------GHTVELLAVLDAYPVTGARPDA-------------EVDEQRIVAD------------------YLAQLGSPVAPERLEGD---------------AWLPEFLEFVRRTDGPARDFDAG---------------RILAMKDVFLNN-------------ARLTRR--------------FTPGVFTGD--------------------------MVFFASARPGSEQA--AER--------------VGLWHPHVTGDLDLH--LIDCAH-EEMTD------PAALTRIGPV----------
>psm3B|gb|AB279593.1| Cyanobacteria - Microcystis aeruginosa Micropeptin NRPS-T1PKS Thioesterase
---PLFCPHPIGG-NVLGYIALGRYLSPD----QPFYALEAPGLDGKQAPY--------TRIPDLAAYYIKAIQTIKP--IG------PYFLGGHS-FGGLVALEMAQQLQKQ-------GHEIAFLVLMDTPAPIRGN-------------------KTEVIDD---------------------ATWLVKRAKVLERFFGIKIGVNEIEINSLTP-QAQFSYFLAKLRQANLIPPDAGENMIHSLLAVQKASHQALIDYVP-SIYQ------------------------------GKITLLRATDRLI-----------------------EDAQGVYADCFCKSDL------------------GWCELTTEPVEQYNVPGDHITMLTEPY---------VKALASQLKTII-----
>spnE|gb|AY007564.1| Actinobacteria - Saccharopolyspora spinosa Spinosad T1PKS Thioesterase
--ALVCMPALIGMPPAQQYARIAAGFRD----VRDVSVIPMPGFI----AGE----PLPSAIEVAVRTQAEAVLQEFAGG--------SFVLVGHS-SGGWLAHEVAGELER-------RGVVPAGVVLLDTYIP--GEITP-------------RFSVAMAHRTYE--K------------------------------------LATFTDMQDVGITAMGGYFRM--FTEWTP--------------------TPIGAP--------------------------------------------------------------------------TLFVRTEDCV-------ADPEGRP-WTDD------SWRPGWTLADATVQVPGDHFSMMDEHAG----STAQAVASWL---------
>endC|gb|DQ403252.1| Actinobacteria - Streptomyces fungicidicus Enduracidin NRPS Thioesterase
---PLFCVHPAGG-LSWCYTPFAQHAPDD----QPVYGLQARGVDGGAP--------FAGSLAEMAADYIEQLRQVQPAG--------PYHLVGYS-FGAAPAHEIAVQLREQ-------GEEVAALVIMDSFP--LDREIA-------------A-------------------------------TGAEDGAAPGGD---------------LSWEGAIRAEFGHLLG---GFTDE---------------EIAVVARTFENNTR---------IRAAHTTGR------------------FDGD--------------------------ALILTSADSTTEDGPLTAK-----------------WAPHVLGELTEV--SIPCGH-VDMVR------PDMMGLAWQAISAWL-----
>endC|gb|DQ403252.1| Actinobacteria - Streptomyces fungicidicus Enduracidin NRPS Thioesterase(2)
----SLLCVPFAGAGASFFHPWAALTDGN----PRIVALQLPGREWRLSEEP------YRDVARAAAELLPVVTEEIGPDD-------RVVIFGHS-LGAVLAYELAHLLVDR------TGVDVARLFASGSPGPWTRRTRR--------------------------------------------------ATGLPDEEFLLRVKEFAGYDHEALSHPDMRELILPTLRADVEMHEN---------------YVPAGDRPLPVP--------------------------------------------------------------------VTAVRGTRDDLVTAEQTG-------------------EWARATSAGFTRAEVEGGHMYIAEDP-----GSLLRLVDDAL---------
>pstA|gb|AJ488769.3| Actinobacteria - Actinoplanes friuliensis Friulimicin NRPS Thioesterase
---ALVCFPYAGG-NAVNFRALATALRHDG---IAVYGVELPGHDLAADRE------PMADVPQIAARVAAEIRDQLR---------IPVLLWGHC-AGAAAALATARLLEQA-------GAPAERVFLGALLVESAGELRRESAEAEAADNPTLLA-------------------------------RLRAESAYVELDGLQPERLDIVGSSYRHDVVTANRYLLDLLAEPHRH---------------------------------------------------------------------------------------------RIEAPVHVVAAADDPTTPGHETRY-----------------ADWKLVADRVELHEVADGGHYFAGSRPEATAELVRAAC--------------
>pstD|gb|AJ488769.3| Actinobacteria - Actinoplanes friuliensis Friulimicin NRPS Thioesterase
---PLFCLHPGGG-FSWCYAGLVQHLDAD----VPVYGIQARGLD--------GRTTPASTMDEMVDDYLTEIRRIQPHG--------PYRLAGWS-FGGLSAHALAVRLRHE-------GEEVELLALLDAYPPTPGADRL-------------EVVEHEVVAH------------------NMRALGFDFEEQELLGDQ-------------EAVLLRFRDFLRASDASLGHLDAH---------------DILALKDVYVNN-------------VRIMRA--------------FRPQFFDGN--------------------------ILFVSAAKMSAQDR--ESRL------------NVHFWQPFIGGSVDVA--DVESTHGDLMTD------PRHVASVGAILDSR------
>massC|gb|EU199081.2| Proteobacteria (Gamma) - Pseudomonas fluorescens SS101 Massetolide NRPS Thioesterase
---PLFLVHEFSG-MDVYFPALGQHLPGD----YPIYGLPG--VALGEA--------HLDSMEGLAARMVGLIRQIQPHG--------PYRLAGWS-FGGVLAYEVAMQLLGQ-------DEAVAFLGLIDSYVPRMTDQGK-------------ARWSGPD----------------ALKRHLLLQCTAYWKAQG--GVDELASLDQLEAGLGQLDIAALLQRCRDQGLLYAQMAAATD-----------ADLLSFLQREVGH---------------GHALAH-------------YSLFPLPIP--------------------------VHLFSAE--QRPTELSRRSAALG-------------WDTALAPGQLRQ-VQVPGDHQSMMQAP-------HIQSLGQAMSQAL-----
>massC|gb|EU199081.2| Proteobacteria (Gamma) - Pseudomonas fluorescens SS101 Massetolide NRPS Thioesterase(2)
---PVFCVPGAGD-SVTGFVGLSEALGRD----WPLYGLQPRGLDGEAVPH--------SQVEAAAQCYLAALEQECP--EG------PVHLVGHS-FGGWVALEMALRLQAM-------GREVGSLTVIDSEAPGR-----------------------------------------------------------------------------------------------------------------------ASKAYTSTAALL------------------------------RLIEAMQLA-------------------------------------------------------------AGKSLGIDAVDFAGRD-------------------------EVAQR-------
>vinP4|gb|AB086653.1| Actinobacteria - Streptomyces halstedii Vicenistatin T1PKS Thioesterase
--RLFCFASPMAMGGTHQYARLAAHFRG----VREVSALPMPGFA----TGD----LLPATAEAVVEVFGRSLLRAAGDE--------PFVLLGYS-AGGVFAHAVAAWLES-------EGCAPAAVVLLDSYRADGGTSMD-------------GDFWVSMVEGLFSR-------------------------------------EEVFGRFTSARLSAMGRYARL--VGEVKT--------------------GEVKAP--------------------------------------------------------------------------VLFVRPERSLSASADAGGVGGGDAGAAAATD----DWRASWDTAETVLEVAGDHFDIIESQAA----ATADAVEGWL---------
>mlaG|gb|FJ872525.0| Actinobacteria - Streptomyces sp. MP39-85 ML-449 T1PKS Thioesterase
--RLICLSTPMAGGGVHQHARLGSEFRD----VRPVSALALPGFQ----RGE----PLPESVEVLSQVLGEAVLAAADGD--------PYVLLGYS-SGGIIGHVLARHLEET------VGVPPAGLVLIDTFRVEDTAMN--------------VGFGHLMG-ELLTV-------------------------------------ETTVGSFDTARLSAMPYYFQV--LAGFDP--------------------VRLAAP--------------------------------------------------------------------------TLFVQAS-----EPFVQPPEGVDVAEMRAQP---------WDTEHTLRTVEGNHFSLGQEHAP----ATARAIEEWL---------
>becG|gb|FJ872523.0| Actinobacteria - Streptomyces sp. DSM 21069 BE-14106 T1PKS Thioesterase
--RLICLATPMAGGGVHQHARLGSEFRD----VRHVSAVALPGFH----RDE----PLPDSVEVLTQVLGDAVLAAADGE--------PFVLLGYS-SGGIIGHIIARHLKET------LKVPPAGLVLIDTFRVEDTAMN--------------VGFDHLMG-ELLTV-------------------------------------ETTLGNYDAARLSAMPHYFQV--LAGFDP--------------------VRLDTP--------------------------------------------------------------------------TLFVQAS-----EPFVQPPEGVDVAEMRARP---------WDSEHTLRTVEGNHFSLGQDHAP----ATARVIEEWL---------
>Strop 2778|gb|CP000667.1| Actinobacteria - Salinispora tropica CNB-440 Salinilactam T1PKS Thioesterase
---IVCLPSPMALGGDQQYARFTAEFGG----TRDVWTLPVPGFG----RDE----SLPASSDAAVRVFAEMVRPIAEQG--------PYVIVGYS-SGGLFAHATAGELER-------QGHGPTGVVLLDTYLTTG--STT-------------ATFFTHMLDSLLDR-------------------------------------EATFGEFSSARLSAMGRYIRL--LESCPI--------------------DSIGTP--------------------------------------------------------------------------VLFVRP--------QESIVAGDDDG-----------WRATWETPHTLREVPGNHFTMMEGQVG----ATASVVRDWI---------
>acmC|gb|HM038106.1| Actinobacteria - Streptomyces anulatus Actinomycin NRPS Thioesterase
---PLFCIHPGGG-ISWSYSALIKHLGPE----YPLYGIQARSLARPEP--------RPESIEEMAVDYADQIQGVQPHG--------PYHLAGWS-FGGLCAHALAAEFQRR-------GEPVALVAVLDVIPNWQGLTHD----------------DVPAPDD---------------RVMLLYHVGLVDDGSHRNDRE-------------ELTFARAREILRRQGSVLANLEE---------------DRLTTITEISANN-------------THLTVDY--------------QPGPIDGD--------------------------LLLIAASEQQ--DPPVTAD----------------AWRPYVCGAVEA--HVVPGEHGSMLTR------PGTLAEIGRILSA-------
>pcbAB|gb|D50308.1| Proteobacteria (Gamma) - Lysobacter lactamgenus ACV NRPS Thioesterase
---TLFVLPPGEGGAESYLNNLAKQLPNL-RLVLFNNVHLHTP---------------MQSFEDIAQYYMAHVRRLQPRG--------AYNFFGWS-FGGVVSLEMSLQLLND-------GESVSNLLMVD---SFF-NVEKTVDDLRLPK-----------------------------------HGNSLDPINHR------YKPNEQALEALAKSADNIVLFKAIEPID--------------QHDSDEQ------------------------------------------------------------------------------------------RKVFEYYASSPFNNLDTLLPPSA--------------FTLEILGDN--SHFSW--------------------------
>paeF|gb|HQ668144.1| Firmicutes - Paenibacillus elgii B69 Paenibactin NRPS Thioesterase
---PLFCVHPAGG-LSWCYAGLMKHLGME----HPIYGLQARGIAQSET--------LPESLDEMTADYIAHIRTVQPTG--------PYRLLGWS-LGGNVAQAMAVQLQQE-------GEEVEFLAMLDAFPSHYLPIRG-----------------EVDEEE--------------ALTAMLALGGYD--PDSLGDV--------------PLTMAAAIEILRSDGSALASLDE---------------AIIRNLRTTYENS-------------VRLLGAY--------------VPKRYEGD--------------------------LLFFHSTIIP--DWFDPID--------------PEMWLPYISGQMER--YDIACRH-KDLCQ------PGPLTEIGQQISVKL-----
>bacC|gb|AF007865.2| Firmicutes - Bacillus licheniformis Bacitracin NRPS Thioesterase
---NLFCFPPAAS-MGIAYMGLAKHLKQH-----SVYSFNFIPSAN------------------RIRKYADIIKNIQGEG--------PYTLIGYS-SGGILAFDVAKELNRQ-------GYEVEDLIIIDSKYRTKAEKHQ-----------------------------------------------------FTEEEYREEISKTFELEKYRDVEKLLSDYLVDLVMKSYVYIQN-----------------TVTTGAIDG-----------------------------------------------------------------------HISYIKSSDNQRGEN------------------MMMWEKATSKTFTVVQGAGTHMQMISKSHP----DILERNARLI---------
>irp1|gb|Y12527.1| Proteobacteria (Gamma) - Yersinia enterocolitica Yersiniabactin T1PKS-NRPS Thioesterase
---TLFVFHASDG-DISAWLPLASALN------RRVFGLQAK----SPQR--------FGTLDQMIDEYVGCIRRQQPHG--------PYVLAGWS-YGAFLAAGAAQRLYAK------GEQ--VRIALID--PVCRQDFCC-------------ENRA-------------------ALLRLLAEGQTPLALPEHFDQQTPD------------SQLADFISLAKTAGMVSQNLT---------------LQAAETWLDNIAHL-------------LRLLTEH--------------TPGEN--------------------------VPVPCLMVYAAGRP-ARWTPA---------------ETEWQGWINNADDAV---IEASHWQIMME------APHVQVCAQHITRWL-----
>grsB|gb|X61658.1| Firmicutes - Brevibacillus brevis Gramicidin NRPS Thioesterase
---NVFLFAPIGA-QGVFYKKLAEQIPTA-S-LYGFDFIEDDDR---------------------IQQYIESMIQTQSDG--------QYVLIGYS-SGGNLAFEVAKEMERQ-------GYSVSDLVLFD--VYWKG--KV-------------FEQTKEEEEENIKIIME-------------ELRENPGMFNMTREDFEL---YFANEFVKQSFTRKMRKYMSFYTQLVNYGEV--------------EATIHLIQAEFEEEK---------------------------IDEN---------------------------------EKADEEEKTYLEEKWNEKAWNKAAKR-------------FVKYNGYGAH--SNMLGGDGLERNS--------SILKQILQ-----------
>licC|gb|U95370.1| Firmicutes - Bacillus licheniformis Lichenysin NRPS Thioesterase
---HLFAFPPVLG-YGIVYGKLAEQMPEY-K-IHAFDFIESDDR---------------------AVRYAEAISGLQPEG--------PLTLIGYS-AGCGLAFEVAQTLEKN-------GRKVEKLLMID---SYMKNG-V-------------SDLEGRSIEAD-----------------------TAALMEANKDN-----EYMKIKTVADGIAKKMAAYYSYFVNLVHQG-------------------TVSCEIH------------------------------------------------------------------------LIKSEHAKPLPEWLSTWKEGTES------------SYDEYQGAGRH--DEMLADVFVKTNAD--------LIRQIL------------
>syrE|gb|AF047828.1| Proteobacteria (Gamma) - Pseudomonas syringae pv. syringae Syringomycin NRPS Thioesterase
---PLFLVHPLGG-EVQYVRDLAAAIDPQ----VPLYGLAASGLAAGET--------PLYEVPAMAARYLAAIRQVQPKG--------PYRIGGWS-AGGLIAYEMARQLQSS-------GEKLEFLGIIDTSARLEQQAPE-------------A----------------------------------------------------------LSEGQFLMDWLPEQ-----------------------------LDPEVFR---------------QLT-EL-------------AGTDAIDEM--------------------------LALCMAHR-LLPEELPQDVDATL-------------LRSHLAVAHATH-IAI-GNYVSPPAP----------------LTVTLF----
>tycC|gb|AF004835.1| Firmicutes - Brevibacillus brevis Tyrocydine NRPS Thioesterase
---NVFCFTPIG-AQSVYYQKLAAEIQGV-S-LYSFDFIQDDNR---------------------MEQYIAAITAIDPSG--------PYTLMGYS-SGGNLAFEVAKELEER-------GYGVTDIILFD---SYW-KDKA-------------IERTVAETENDIAQLFA-------------EIGENTEMFNMTQEDFQL---YAANEFVKQSFVRKTVSYVMFHNNLVNTGMT--------------TAAIHLIQSE---------------------------------------------------------------------LEADEEAP--VAAKWNESAWANATQR-------------LLTYSGHGIH--SRMLAGDYASQNA--------SILQNILQ-----------
>snbDE|gb|FN563143.1| Actinobacteria - Streptomyces pristinaespiralis Pristinamycin NRPS Thioesterase
---PLFCVHPAGG-FGWVYSALLRHTDRE----QPLYALQARGLA-R-P-E-----PLPDDIDAMARDYAEQIRKTVPEG--------PYEILGWS-FGGLVAHAVAARLQAE-------GAEVSLLAVLDGYPD---AYDG-------------TEHEVGEEQ---------------VLAILLNAAGVD-RAQAFGDA--------------PLQRAAVLEKLRDSGSALGNLDD---------------DAVGRMVTVFLNN-------------TRLIQNF--------------RPRRFTGD--------------------------MVFFAAAAGH--HDPA------------------------------------------------------------------------
>snaD|gb|FN563144.1| Actinobacteria - Streptomyces pristinaespiralis Pristinamycin NRPS Thioesterase
---TVHLVHPPGG-QVACYAQLAAGYPGP----EALVGIRDPRVDDPEPE--------YRSTEQLAEHYLQALAPALESGE-------RIVLGGFS-GGGVIAYEIAQRITAQ-------GGTPPLVVMVDAGAPDGELTDA------------------------------------------------------------------EADGSFAGQLRAVAEGRTPDPASTTTDPEP--------------------------------------------------------------------------------------------------PATDDDRAAATAEPAG---------------SAAYLAEISQIAEWMRGDGGGDLVALMR-------DSVEAIQR-----------
>pchF|gb|EU088199.1| Proteobacteria (Gamma) - Pseudomonas fluorescens Pyochelin NRPS Thioesterase
-----IFVHDGSG-TLAPYRALFAALGEEAP----LEGLVLNDVPAYLALEP------ATAIRQLAERYADTLQAEGRR---------QVSIVGYC-LGGLLATELAACLAAR-------SVEVLQLSVISSYRVPFMIEDD---------------------------------------------LLAEYVFARVMQADPLALGYPEDEQAMERTIARVLTQTPG-RVPQGSLLALSEDAQCAP---ALACLRRLAHKTPEQRLQA-------------------------------IAEAMRHAGSQLSDL----------------HWLREQLQVLRHSLAAVALHEATPYQGDMLFIRQSGEVQVLPGMHRDMSAYWQALCLGELRVVDVPGDHFSCMQQPQVQAVAQAFDA----
>pchF|gb|AF074705.2| Proteobacteria (Gamma) - Pseudomonas aeruginosa PAO1 Pyochelin NRPS Thioesterase
-----VLVHEGLG-TLLPYRPLLRALGEGRP----LLGLAVHDSDAYLAIPA------EHLNACLGRRYAEALHRAGLR---------EVDLLGYC-SGGLVALETAKSLVQR-------GVRVRQLDIVSSYRIPYRVDDE---------------------------------------------RLLLFSFAATLGLDTAALGFP-APERLGQAVQAALAQTPERLVAEALAG-----------------LPGLADLVALRGRVL-------------------------------QAASGSADAVSVER--------------------DTLYRLFCHSVRASQAEAPEPYVGALRLFVPDAGNPLVPRYAEALETQWRAAALGACGIHEVPGGHFDCLGEALAQSLSKP-------
>PKS13|gb|DQ019316.1| Eukaryota (Fungi) - Gibberella zeae Zearalenone NRPS-T1PKS Thioesterase
---PFYLIADGTG-TIATYIHLP-QFKSQIP----IYGIDSPFLRCP------TRFTTDVGITGAARFITEALMKAQPEG--------TFVLGGFS-GGAMLAYEVCRQLAAA-------NRKVDSLMLIDMCSPR-----S---------KTVEDKNDIGWAIFES--------------------------------------ISRQN--GLWRSTDMTRQHLQAIFAAVATYHPQP--------------LKAS-----------------ERPKRTAIIWAEKG----------------MIDRCAGDSELMQKLAKRGIPTEPYPKFMEDSELGPVAWGLPHKTKND------------LGPNGWERYVG--DALCLSMPA--DHLEMPM--------------------------
>ttnB|gb|EU035755.1| Actinobacteria - Streptomyces griseochromogenes Tautomycetin T1PKS Thioesterase
---LILVCPTVMTTGPQVYSRLAEELD---A-GRRVSALVPPGFHG----GQ----ALPATLTVLVRSLADVVQAEVADG--------EFALAGHS-SGGVVAYEVARELEAR-------GLAPRGVVLIDSYSFDGDGGR----------------PEELFRSALNERFVEYLR--------------------------------LTGGGNLSQRITAQVWCLEL--LRGWRP--------------------EGLTAP--------------------------------------------------------------------------TLYVRPAQPLVEQEKP------------------EWRGDVLAAMGQVVEAPGDHFTIIEGEHVA---STAHIVGDWL---------
>ABI94380.1|gb|DQ983361.1| Actinobacteria - Streptomyces sp. CK4412 Tautomycetin T1PKS Thioesterase
---LILVCPTVMTTGPQVYSRLAEELD---A-GRRVSALVPPGFHG----GQ----ALPATLTVLVRSLADVVQAEVADG--------EFALAGHS-SGGVVAYEVARELEAR-------GLAPRGVVLIDSYSFDGDGGR----------------PEELFRSALNERFVEYLR--------------------------------LTGGGNLSQRITAQVWCLEL--LRGWRP--------------------EGLTAP--------------------------------------------------------------------------TLYVRPAQPLVEQEKP------------------EWRGDVLAAMGQVVEAPGDHFTIIEGEHVA---STAHIVGDWL---------
>ituC|gb|AB050629.1| Firmicutes - Bacillus subtilis Iturin TRANSATPKS-NRPS Thioesterase
---PVFCFPPLIG-YGLVYNEMAKRLDGVST-VYAADFLEEPSHEK-----------------EIVDRYAESMIRIQEQG--------PFVLLGYS-SGSNLAFEAAKALEKR-------GRTVSDVIMLD-------SKIT-------------TSVTHLSEEE------------------------IEEIVHLNMDIIP---DYYREILTIPSIKDKIRGYLAYHNEVINSG---------------------AVNAN--------------------------------------------------------------------------IHHLLCGDVTDDRGWTQSTAQH------------YLEYKLKGDH--VTIFEPHNIEENA--------EAIRSIIK-----------
>mycC|gb|AF184956.1| Firmicutes - Bacillus subtilis subsp. spizizenii ATCC 6633 Mycosubtilin TRANSATPKS-NRPS Thioesterase
---PVFCFPPLIG-YGLVYNEMANRLDGDCV-VYAADFTEDPSYKK-----------------PIIDRFAESMIDIQEQG--------PFVLLGYS-SGSNLAFEVAKALEQR-------GRTVSDVIMLD-------SQIT-------------TSVTHLSEKE------------------------VEEIIHLNLDIIP---VYYRELLTIPSIKEKIRGYLAYHNQLINSG---------------------TINAN--------------------------------------------------------------------------IHHLLCDDMT-ERGWTHSTAHN------------YKEYELKGDH--VTIFDPQYIEENM--------STIRSIM------------
>pksL1|gb|L42765.1| Eukaryota (Fungi) - Aspergillus parasiticus Aflatoxin T1PKS Thioesterase
---TLFMLPDGGG-SAFSYASLP-RLKSDT----AVVGLNCPYARDP--------ENMNCTHGAMIESFCNEIRRRQPRG--------PYHLGGWS-SGGAFAYVVAEALVNQ-------GEEVHSLIIIDAPIPQA----------------MEQLPRAFYEHCN---------------------SIGLFATQPGA------SPDGSTE-----PPSYLIPHFTAVVDVMLDYKLAP--------------LHARRMPKV------------------GIVWAA------------------------------DTVMDERDAPKMK----------GMHFMIQKRTEF--------------GPDGWDTIMPGASFDIVRADG-ANHFTLMQ-------KEHVSIISDLIDRV-----
>pks4|gb|AJ278141.1| Eukaryota (Fungi) - Gibberella fujikuroi Bikaverin T1PKS Thioesterase
---TLFLFPDGAG-SATSYVTLP-SISS----DMRVIGLNSPYLT--------KPHEFNCALQDITGSYLNEVRRRQPQG--------PYHLAGWS-AGGVSAFDAARQLVSE-------GEVVESLILIDSPNPVG----------------LGKLPKRMYDFLE---------------------KSGIFGAF--------EMGEEAQA-----PPDWLFQHFCVFIEALDRY--VP--------------EPFEHG----------------MAPKTTIIWAA------------------------------DGVCKNPDDPRPEAQPD---DPRGMNWLLNNREDF--------------GPNGWDEFIGAGNIS-TMAIENANHFTMMR-EPIASALCAKIRET-----------
>pksST|gb|L39121.1| Eukaryota (Fungi) - Emericella nidulans Sterigmatocystin T1PKS Thioesterase
---ILFMLPDGGG-SASSYLTIP-RLHADV----AIVGLNCPYARDP--------ENMNCTHQSMIQSFCNEIKRRQPEG--------PYHLGGWS-SGGAFAYVTAEALINA-------GNEVHSLIIIDAPVPQV----------------MEKLPTSFYEYCN---------------------NLGLFSNQPGG------TTDGTAQ-----PPPYLIPHFQATVDVMLDYRVAP--------------LKTNRMPKV------------------GIIWAS------------------------------ETVMDEDNAPKMK----------GMHFMVQKRWDF--------------GPDGWDVVCPGAVFDILRAEG-ANHL------------------------------
>PKS1|gb|D83643.1| Eukaryota (Fungi) - Colletotrichum lagenarium THN T1PKS Thioesterase
---NLWMVPDGSG-CATSYTEIS-QVSSN----WAVWGLFSPFMK--------TPEEYKCGVYGMAAKFIEAMKARQSKG--------PYSLAGWS-AGGVIAYEIVNQLTKA-------GETVENLIIIDAPCPVT----------------IEPLPRSLHAWFA---------------------SIG-------------LLGEGDDEAAKK-IPSWLLPHFAASVTALSNYTAEP--------------IPKEKCP------------------NVMAIWCE------------------------------DGVCHLPTDPRPDPYPTG-----HALFLLDNRTDF--------------GPNRWDEYLDVNKF-RTRHMP-GNHFSMMH-GDYVSQTTLSPYNDDN---------
>PKS1|gb|AF130309.3| Eukaryota (Fungi) - Exophiala dermatitidis THN T1PKS Thioesterase
---NLFLFPDGSG-SATSYVSIP-AIDS?---NLAVYGLNCPFMK--------DPTSYTCGI?SVS?LYLEKVL?RQPNG--------PYIL?GWS-ASGVFAY?IT?QL?DLQ?LHPDKNYTVEKLNLI?SPCPIR----------------LEPLPARLHHFFD---------------------EIGLL-------------GTGTGK-----TPNWLLPHFEYSIKALTAYRPEL--------------KSTRDFN----------------APPTLLIWAT------------------------------DGVCGK---------------------------------------------------------------------------------------------------
>pks1|gb|AF549411.1| Eukaryota (Fungi) - Glarea lozoyensis THN T1PKS Thioesterase
---HLWMVPDGSG-SATSYTEIS-EIGPN----VAVWGLNSPYMK--------VPEEYKCGVIGMASSFISEIKRRQPVG--------PYLLAGWS-AGGVIAFEAVNQLIKN-------GDEVEQLIIIDAPCPDI----------------IEPLPASLHRWFG---------------------EIG-------------LLGDGDLS---K-LPKWLLPHFAASVTALSNYSAEL--------------IDPKKSP------------------FVTAIWCE------------------------------DGVCHLPTDPRPDPFPYG-----HAQFLLDNRTDF--------------GPNLWDKYLNGERF-VTKHMP-GNHFSMMK-GDLVSS-----YPSH----------
>pks1|gb|AF151533.1| Eukaryota (Fungi) - Nodulisporium sp. ATCC74245 THN T1PKS Thioesterase
---HLFMIPDGSG-SATSYTEIS-DLGSD----VAVWGMFSPFMR--------TPEEYKCGVYGMATKFIEEMKRRQPEG--------PYAVSGWS-AGGVIAYEIVNQLTKA-------GDEVSHLLIIDAPCPIT----------------IEPLPAGLHAWFA---------------------EIG-------------LLGEGDGE-AKK-IPSWLLPHFAASVTALSNYTADP--------------IPKDKCP------------------KVTTIWCE------------------------------DGVCKLPTDPRPDPYPTG-----HALFLLDNRTDF--------------GPNRWDEYLDIEKM-TFHHMP-GNHFSMMH-GDLAKQ--LGGFLKEG---------
>alb1|gb|AF025541.1| Eukaryota (Fungi) - Aspergillus fumigatus THN T1PKS Thioesterase
---KLFMFPDGSG-SASSYATIP-ALSP----DVCVYGLNCPYMK--------TPQNLTCSLDELTEPYLAEIRRRQPKG--------PYSFGGWS-AGGICAFDAARQLILEE------GEEVERLLLLDSPFPIG----------------LEKLPPRLYKFFN---------------------SIGLF-------------GDGKRA-----PPDWLLPHFLAFIDSLDAYKAVP--------------LPFNDSKW------------AKKMPKTYLIWAK------------------------------DGVCGKPGDPRPEPAEDGSEDPREMQWLLNDRTDL--------------GPNKWDTLVGPQNIGGIHVMEDANHFTMTT-GQK----------------------
>wA|gb|X65866.2| Eukaryota (Fungi) - Emericella nidulans Naphtopyrone T1PKS Thioesterase
---TLFLFPDGSG-SATSYATIP-GVSP----NVAVYGLNCPYMK--------APEKLTCSLDSLTTPYLAEIRRRQPTG--------PYNLGGWS-AGGICAYDAARKLVLQQ------GEIVETLLLLDTPFPIG----------------LEKLPPRLYSFFN---------------------SIGLF-------------GEGKAA-----PPAWLLPHFLAFIDSLDAYKAVP--------------LPFNEQEW------------KGKLPKTYLVWAK------------------------------DGVCPKPGDPWPEPAEDGSKDPREMVWLLSNRTDL--------------GPNGWDTLVGKENIGGITVIHDANHFTMTK-GEKAKELATFMKNA-----------
>AAT69682.1|gb|AY649543.1| Eukaryota (Fungi) - Cercospora nicotianae Cercosporin T1PKS Thioesterase
---ILFLFPDGAG-AATSYLSLP-RLGEDIG----VVAFNSPFMKTP-------HKFADHTLPDVIASYVEGIRGRQAQG--------PYHLGGWS-AGGILAYAVAQELIAA-------GEEVSTLLLIDSPSPTKG---------------LDRLPTRFFDHCT---------------------NVGLFGTELSR-------GSGGPN----KTPEWLMPHFRASIELLHGYHAPP--------------MKLGNKT------------------KVMVIWAG--------------------------ECAFDGVRYAHIPPSAGDTDEDT---EGMKFLTEKRKDF--------------GATEWASLFPGTDVDARVVES-EHHFSMMR---DSGAQMLVEHMRDG---------
>pksA|gb|DQ149246.3| Eukaryota (Fungi) - Mycosphaerella pini Dothistromin T1PKS Thioesterase
---TLFLLPDGGG-SASSYSVIP-KLQSDV----AVVGINCPYARDP--------ENMTCTWQAMMQSFINEIKRRQPKG--------PYHLGGWS-SGGAFAYVTAEKMIKQ-------GDEVGSLFIFDAPVPQV----------------MEKLPREFYEAVN-------------------------FTESTAV---------GTAE-----PPPYLIPHFMAVVDVMLDYKCKP--------------LQTKKMPNV------------------GLIWAD------------------------------STVMKEDEAPKMK----------GMHFMIQKRTNF--------------GPDGWDEVCPGAKFEIVKAVD-TNHFTLMT-------KARVNYVSDLIDKV-----
>mmpB|gb|AF318063.2| Proteobacteria (Gamma) - Pseudomonas fluorescens Mupirocin TRANSATPKS-T2PKS-T1PKS Thioesterase
---GLFCFPAAGA-GAQSFHALAAALGDV----AQLQVLEYPPLDTQAPP--------DLSMQRMVAAHVHTVTRRCPAG--------VVRLLGHS-FGASVAFEVAVELQAR--------GRQVQLFMLDSFFYVPQELQG-------------------------------------------EVLTSAQLRYFLGDTPLCARLLDAQDKGAVVSLKQVRELMRDASLNQGPAQGPG------------AWLAAQIAMSVDYRP-------------------------------------------------------------------THTFTGDTCVIIAAQSILGASSLP---------HTLARYCAYLTASPHVATVDGGHMSMLNP-------GNVHTLARALR--------
>bpsC|gb|Y16952.3| Actinobacteria - Amycolatopsis balhimycina DSM 5908 Balhimycin NRPS-T3PKS Thioesterase
---PLFCVHASGG-LSWNYEPLLRYLPPN----QPVYGVQARGLARTEP--------LPGSVEEMAADYLEQIRAVQPAG--------PYHLLGWS-LGGRIAQAMARLLEAD-------GERLGLLALLDAYPVYMG-------------------------------------------------------RKTTG----------------AASEEAALEQRNQQDLDLAGQLVK------------GVAARSRLEAVMRNL-------------WKVGPRH--------------TRSPFAGD--------------------------VLLFVATVDR--PAHLPVP------------VAKASWKEFTSGAVEA--HEIPSNH-YDMVQ------SAALGQIGAIVAEKL-----
>AAM80536.1|gb|U82965.2| Actinobacteria - Streptomyces toyocaensis Teicoplanin NRPS-T3PKS Thioesterase
---PLFCVHASGG-LSWNYGPLLRELPSN----QPVYGIQARGLARTEA--------LPGGVDEMAADYVSQIRTVQPTG--------PYHFLGWS-LGGRIAQAMAALLEAE-------GEQVGVLALLDAYPTYMG-------------------------------------------------------KKARG----------------DGRTQAAVDKLKEQQMELAAGLVR------------GDGARARLEEVMRNL-------------AEVGPRH--------------EAPSFAGD--------------------------VLLFVASKDR--PPHMPVD------------WAIASWQPLTSGTVEH--HEIPVDH-NEMMQ------PASLARIGAV----------
>bmyC|gb|AJ576102.1| Firmicutes - Bacillus amyloliquefaciens FZB42 Bacillomycin NRPS-TRANSATPKS Thioesterase
---PVFCFPPLIG-YGLVYNEMAKRLDGRCT-VYAADFLEEPSYEK-----------------EIVDRYAESMIGIQEQG--------PFVLLGYS-SGSNLAFEVAKALEKR-------GRIVSDIMMLD-------SKRA-------------VSVNYFSEEE------------------------TEEIIHRNLDIIP---DYYRELLTIPSIKDKIRSYLTYHNKLINSG---------------------AVNAN--------------------------------------------------------------------------IHHFLCGELT-DRGWKQSTAQH------------YLEYKLKGDH--VTIFDPHNIEENT--------DTIRSIIK-----------
>difL|gb|AJ634062.2| Firmicutes - Bacillus amyloliquefaciens FZB42 Difficidin TRANSATPKS Thioesterase
---PIFWFHSALG-AVELYQPVAERTGRP------FYGIQARGWM--------TDREPIRGIKNMAEYYVKLIRTVQPRG--------PYDVGGYS-LGGMLAYEVTRQLQLA-------GETVESIVMLDSFDSAGAREIN--------IPDELFDKNMMLQTVNMA---------------------LFAPIYQHPERISETLIHRDELNAD-LHEDIFLEQLIAKAKQRGLTKTDAL-------------VKNLIRQNINVQDAYEITDYELLP---------------------------------------LPDPNGVTCYYFRNKNGIFLGELDPYFTIR-ADILS--------ADFVNYWSQWEEHMTNIAI--MDVAV-SNHMTLLAEDST--AETISEFCGVL---------
>AEZ54379.1|gb|HQ840721.0| Actinobacteria - Streptomyces piomogenus Piericidin T1PKS Thioesterase
--RFFCFPSFASRSGAHQYARLAAAFDG----RHELWALPAPGFA----AGE----RLPADLDALVRLHAEDVERLAADE--------PFVLLGHS-AGGWIAHAVATYLEK-------LGTAPVSVVLLDSYRPG-SAILP-------------RIQAEIAKLLTGG-Q------------------------------------LPADQLLDDTCLTAMGGYARL--FESWQP--------------------QPLATP--------------------------------------------------------------------------TLQLRAAR---------------------------------PLPG-----------------------------------------
>AFO59866.1|gb|JX014302.0| Actinobacteria - Streptomyces sp. YIM 56141 Cycloheximide TRANSATPKS Thioesterase
--DLVCLPSLIAPTGAHQYVNFAGALRG----RRQVWAASLPGYR----PGE----PLPADLEAAAERLATTLLRRFGGG--------GFALGGYS-SGGWLAHEVVRRLEA-------AGAPPAGLVLLDTPRTTGAAMLG-------------GMT-VITRRLLDR---------------------------------------FPRLPLADEQVTAMARYGEL--LDDWRP--------------------LPVTTP--------------------------------------------------------------------------TLLVGAAQE----------GPLLELLGED-------ARSGWPLEHRRTDLAGDH--------------------------------
>epoF|gb|AF217189.1| Proteobacteria (Delta) - Sorangium cellulosum Epothilone T1PKS-NRPS Thioesterase
---RLFCFHGSGG-SPEGFRSWSE--KSEWS-DLEIVAMWHDRSLASEDAP------GKKYVQEAASLIQHYADA-------------PFALVGFS-LGVRFVMGTAVELASRSG----APAPLAVFALGGSLISSSEITPEMETDIIAK----------------------------------LFFRNAAGFVRSTQQVQADARADKVITDTMVAPAPGDSKEPPSK-----------------------------------------------------------------------------------------------------IAVPIVAIAGSDDVIVPPSDVQD-------------------LQSRTTERFYMHLLPGDHEFLVDRGREIMHIVDSHL--------------
>SACE 0724|gb|NC 009142.0| Actinobacteria - Saccharopolyspora erythraea NRRL 2338 Erythromycin T1PKS Thioesterase
--TVICCAGTAAISGPHE--RLAGALRG----IAPVRAVPQPGYE----EGE----PLPSSMAAVAAVQADAVIRTQGDK--------PFVVAGHS-AGALMAYALATELLDR-------GHPPRGVVLIDVYPP---GHQD-------------AMNAWLEEL-------------------------TATLFDRET--------VRMDD----TRLTALGAYDRL--TGQWR--------------------PRETGLP--------------------------------------------------------------------------TLLVSAGEPMGPWP---DDS--------------WKPTWPFEHD--TVAVPGDH--MVQ--EH--ADAIARHIDAWL---------
>gfsE|gb|AB469193.0| Actinobacteria - Streptomyces graminofaciens FD-891 T1PKS Thioesterase
--MLVCFPSVVGPSGPHQYARFAGPLRD----RREVWAVAPPGFV----QGE----LLPKDLATYTDATADAVARRVGET--------PFVLVGYS-SGGWLAHAVASRMEE-------QGAAPAGVVLLDTYLPEG--VVG-------------QLGPELVGGLLERRE------------------------------------KFRFDFGDDVWLTAMGGYFRL--FDHWRP--------------------AAIKAP--------------------------------------------------------------------------SLLVRSSE------------PMPGVPSDT------DWRSRWDLPHTAVDVPGNHYTLMEDHAA----ETARAVRDWV---------
>pelF|gb|HE616533.1| Proteobacteria (Delta) - Sorangium cellulosum Pellasoren T1PKS-NRPS Thioesterase
---RLFCLPYAGA-GASRFRSWADLLPSW----VEVCPIQLPGREERLAEP------AFVEPGLLLDALLPALEDHLDR---------PFALFGCS-MGGLLAFALARRLRAR------HGLTPVHLFGAACMAPHRPYPALQEVARLITEDRVG----------------------------ERSIAALERLGILSSAILNDEETRRQVWPSLHADLSIALKYTCEEEP--------------------------------------------------------------------------------------------------PLECPLSIFGGLQDRSLGREDLLA-----------------WHAQTQG---------------------------------------------
>tcp12|gb|AJ605139.1| Actinobacteria - Actinoplanes teichomyceticus Teicoplanin NRPS Thioesterase
---PLFCIHASGG-LSWNYGPLLRHLPPN----QPVYGVQARGLARTEP--------LPGSVEEMAADYVEQIRTVQPTG--------PYHLLGWS-LGGRIAQAMAVLLEAD-------GEKVGLLALLAAYPVYMG-------------------------------------------------------RKATGTVT-----------EEAARDEDALERRKQQELELAGQLVQ------------GAGARSRLEAVMRNL-------------WEVGPAH--------------TASPFASD--------------------------VLLFVASVDR--PAHLPVS------------EAIASWKDGGT--IEP--HEIATNH-YEMVQ------PAALAQIGAIVAEKL-----
>Rv2383c|gb|AL123456.2| Actinobacteria - Mycobacterium tuberculosis H37Rv Mycobactin NRPS-T1PKS Thioesterase
---AVLVFPHAGG-AAAAYRWLAKSLVAN---DVDTFVVQYPQRADRRSHP------AADSIEALALELFEAGDWHLTA---------PLTLFGHC-MGAIVAFEFARLAERN-------GVPVRALWASSGQAPST-VAASGPLPTADRD---------------V----------------LADMVDLGGT---DPVLLEDEEFVELLVPAVKADYRALSGYS---------------CPPDVRIR-----------------------------------------------------------------------------------ANIHAVGGNRDHRISREMLTS-----------------WETHTSGRLS----HFDGGHFYLN---DH--LDAVARMVSADV---------
>ACY01392.1|gb|GQ274953.0| Actinobacteria - Streptomyces platensis subsp. rosaceus Iso-migrastatin TRANSATPKS Thioesterase
---PVFWVHHGNG-GVESYAPLAARCPRP------FYGIQPKGWI--------DSTDILTGQYAMAEHYASLILAVQPEG--------PYDIGGFS-LGGLFAYETVRQLQLT-------GADVRTLVMLDTLDAESTNKANALIVGG-NFDADVVTKVSDFRAVNLI----------------------LGNNRFDSHGGATPILRRDEVDTT-LEPKEFLGSLIDAALARGVSKTETQ-------------LRSRVRQLSRYFEATQGETYTVDP---------------------------------------LPRR-----------------------------------------DG----------------------------------------------------------
>ACY01402.1|gb|GQ274954.0| Actinobacteria - Streptomyces amphibiosporus Lactimidomycin TRANSATPKS Thioesterase
---PVFWVHHGNG-GVESYAAVAECCGRP------FYGIQPRGWT--------GSEDILTGQEAMAAYYVDIIRAVQPEG--------PYDVGGFS-LGGLFAYEVVRQLQLQ-------DATVDTLVMLDTLDAASTNLANSLMTGGRQDDADVVAKVSAFRAVNLM----------------------LGNDSLDAREGTSSVLHRDEVDTA-LDPDAFLDSLVEAAVARGIHKTPAQ-------------LRTRVRQLARYFDAVHGERHVVHP---------------------------------------LPRREEVRCYYLRNAGGQFFGPFEEYMVLFPEPDLPA-------VDGTPYWREWADAVDDFFV--IDVDT-ETHAQVMTE-------------------------
>depE|gb|EF210776.0| Proteobacteria (Beta) - Chromobacterium violaceum FK228 NRPS-T1PKS Thioesterase
---PLFFAPGAGG-HVPYLRALAAELPNA----FSVWGMTLPG------DA--------GSVEAMATALIADIRRAQP--YG------PYRLGGHS-FGGWVAFEVARQLAGQ-------GEAVDWVAVVDSLPPGPAAQ-----------------SRKQDWQG---------------------GRWVAEIGNSFARLADAELAFDEGEFDALDD-ARRVEHLRERLVEAGAVPEALGLPEFAARVRAFIAH--SLTDYTPATPYA------------------------------GALHVIVAADGDG----------------------------------EALIS------------------GWRQAASGAATAVRLAGDHIGIMRRPF---------VNGLAAAL---------
>BTH II1664|gb|CP000085.0| Proteobacteria (Beta) - Burkholderia thailandensis E264 Thailandamide T1PKS-TRANSATPKS-T2PKS-NRPS Thioesterase
----RVVLIPGLGMAGTVFRDLCRALTRR----HEVIVYHYPGLGRSDPVAP-------IDVDAAAAHLYRTLDACGGDG--------AAALLGWS-FGGVIAQRAALMRPRA-------WRALVLVNTLGAYRPLAPQFLTPG----------------------------------------ASRDGEPRGLGGLYQTDLDFVFAGDAPPAALARKDACAALMRDSLALDAAQAIDYLD------------ALVRFDATAQLP----------------------------------------------------------------------SLRMPTLVVAGTADHFG---------------------DPAHAEQLVSLIPNARLARIAGAGHAVFLTHGEAFEPAVLAFLD----
>oocS|gb|JX315604.1| Proteobacteria (Gamma) - Serratia plymuthica Oocydin T2PKS-TRANSATPKS Thioesterase
---SRFWIHPLTG-STGLYLKVAENLG-DDY-AI--WGIHSRGFLTR--------FPPLKSIESMANYYIEILQAGNATG--------PYELAGYS-MGGIIAYEMARQLQLA-------GYRVSSLILLEPPFPQPEPLRQ---------SSPFDYRDALLMSANFFLH------------------YSLKEILASEQAAFESLAYREQELMG-IDADKQVTWLAEGCLRKGVEQPLSVVK-----------EKIENMAQILKHNREAMAAYVVKA---------------------------------------LPNAQDIDLHYMTLSPSLNDERPDRGSASSALAENNRHVLGEALTHDESHCQRWLDYLPGAQV--FRTRA-KDHFHLLSERES--VAMISDRCRTI---------
>oocS|gb|JX315603.1| Proteobacteria (Gamma) - Serratia marcescens Oocydin T2PKS-TRANSATPKS Thioesterase
---SRFWIHPLTG-STGLYLKVAENLG-DEY-AL--WGIHSRGFLTR--------HQPLQSIESMARYYIDILQAGNATG--------PYELAGYS-MGGIIAYEMARQLQLA-------GFRVTSLILLEPPFPQPENLRH---------SSPFDYRDALLMSANFFLH------------------YSVKDILASGQVEFETLACTEQELMG-IDADNALAWLAERCLKKGVAQPLSVVQ-----------EKIENMAQILKHNREAMAAYSVKA---------------------------------------LPNAHEIDLHYMTVEPSCHDSRSDK----SALAANNRHVLGEALTHDESHCQRWLDYLPGAQV--FRTRA-KDHFHLLSERES--VAMISERCRAI---------
>SVEN 6264|gb|NC 018750.1| Actinobacteria - Streptomyces venezuelae ATCC 10712 Tetracycline NRPS Thioesterase
---PVFLVHSGLG-FSLPYVGLARYLDRR----HPLYGLQSPAVGGAAP--------APDDIRAVAAEYIGHIRRISPHG--------PYRLLGWS-YGGVLAHEIAVQLQQA-------GEEVDFLANLDGYLGSTGREDT-------------D-------------------------------DEQELLLRALES---------------LGHSRAAFADQPLTPAGLLDVLRR---------------ENHPLAELGERGIP---------RLLRLSRTHGE-----------LMERAGRGD--------------------------MHLATREWTADRLDDQTRR-----------------WEPHVDGHLRIH--PVDCGH-EYLMH------PGPQAVVGRAVDA-------
>baeR|gb|AJ634060.0| Firmicutes - Bacillus amyloliquefaciens FZB42 Bacillaene TRANSATPKS-NRPS Thioesterase
---PVFWFHGGTG-GVEAYQPFAKKSQRP------FYGIQARGLT---------GKEPLQGIEETAASYKRIIQAVQPKG--------PYDLGGYS-LGGMLAYETARLLQEE-------GHTVKSAVMIDTPYSEKWKER------------KPSVKSVMLQTINTM----------------------LTAYLK-PENLEEALISREDITVQ-AEEEEVLKELIGLAKKRGLPKSEEA-------------IRMQLEQMMKTQLAYGMEEYDMKP---------------------------------------LPHPEALQCYYFRNKSGLFLGDLERYLTAEEEQIP---------LDHDAYWKEWEHQMKQFHL--LDVHS-SNHVTMLSEPKP--QNAIKAFCEKLY--------
>dbv16|gb|AJ561198.1| Actinobacteria - Nonomuraea sp. ATCC 39727 A40926 NRPS-T3PKS Thioesterase
---PLYCVHASGG-LSWNYAPLLRSLPPN----QPVYGVQARGLARTEP--------LAAGVEEMAADYVEQIRAVQPTG--------PYHLLGWS-LGGRIAQEMARVLEEQ-------GEQVGLLALLDAYPTDVGRL-----------------------------------------------------RRPRG--------------DAADQEAADFDRQQEQQAQLAAAVAT------------EAGARKRLDEVMEHL-------------ARVGPLH--------------TSRSFGCD--------------------------ILLFVATVNR--PSHLPVA------------DAIASWRPLTTGTVEP--HEIEIDH-MQMLQ------PAALARIGAV----------
>BSU17220|gb|AL009126.3| Firmicutes - Bacillus subtilis subsp. subtilis str. 168 Bacillaene T2PKS-TRANSATPKS-NRPS Thioesterase
---PVFWFHGGVG-GVEIYQQFAQKSQRP------FYGIQARGFM--------TDSAPLHGIEQMASYYIEIIRSIQPEG--------PYDVGGYS-LGGMIAYEVTRQLQSQ-------GLAVKSMVMIDSPYRSETKEN------------EASMKTSMLQTINTM----------------------LASIAK-REK--DVLISREEVDIS-LEDEEFLSELIDLAKERGLNKPDKQ-------------IRAQAQQMMKTQRAYDLESYTVKP---------------------------------------LPDPETVKCYYFRNKSRSFFGDLDTY--LSNEKEP---------FDQAAYWEEWERQIPHFHL--VDVDS-SNHFMILTEPKA--STALLEFCEKLY--------
>barG|gb|AF516145.1| Cyanobacteria - Lyngbya majuscula Barbamide NRPS-T1PKS Thioesterase
---PIFCVHPAGG-TVFCYLELSQLLGAN----QPFYGLQSLGQQEGQAPL--------TTVEEMANVYLAAIREVQP--QG------PYLLMGWS-FGGMVALQMAHDLLSQ-------GEQVAFLGLLDTYAPAHMP-------------------------D---------------------EQVLSEDVEVLLELFGGPLSLDWEVLRDLPS-EQQSALIWEQAHQANLVPPDLGAAQIERLLQLMKLNHKAMRSYSP-PDYP------------------------------DVITLLHAEAGSV--------------------------AVSSTEVTTDPTL------------------GWQAISPSKVEVHTIPGYHEYMVYQPT---------VVIVAETIKADI-----
>elaR|gb|HQ680975.0| Bacteroidetes - Chitinophaga sancti Elansolid T2PKS-TRANSATPKS Thioesterase
---PVFWFHAAAG-GVEPYQALAQTIERP------FYGIQARGYM--------TSRQPLKGVSAMAAYYVHIIRSVQATG--------PYDLGGYS-LGGVIAYEVARQLQEM-------GQKVNTIVMLDSLYGAEVSAE------------RFDKRDAILQAVNMS---------------------LFSGIVHSPERFKEVLVNRSLVSDI-TDTDELISTLMAHFKERGGTQSPAR-------------LEEFIRQSVRVQEAYAVDQYEVFP---------------------------------------LPDPTGIKCHYFRNGNGYFLGELAPFFMLSKEQPA---------YDHINYWAEWEQQIPDFEM--TDLDV-ANHMMLLSDETA--YNIISSYCHKI---------
>Cpin 5289|gb|NC 013132.1| Bacteroidetes - Chitinophaga pinensis DSM 2588 Elansolid TRANSATPKS-T1PKS-T2PKS Thioesterase
---PVFWFHAAAG-GVEPYQALAQTIERP------FYGLQARGYM--------TERQPLKGVSAMAAYYIHIIRSVQATG--------PYDLGGYS-LGGVIAYEVARQLQEM-------GQQVNTIVMLDSLYGAEVSAE------------RFDKRDAILQAVNMS---------------------LFSGIVNSPERFKEILINRSLVADI-TDTDALISTLMEHFKERGGTQPVAR-------------LEEFIRQSVRVQEAYVVDQYEVSP---------------------------------------LPDPTGLHCHYFRNGNGYFLGELAPFFMLSKEQPA---------YDHINYWAEWEQQIPDFEI--TDLDV-ANHMMLLSDETA--YHIITDYCRKI---------
>fosF|gb|HQ434551.0| Actinobacteria - Streptomyces pulveraceus Fostriecin T1PKS Thioesterase
--QLVCFPPFAPVDGSLQFARLANHFRG----RRRVSVVTVPGFM----AGE----PLAASLEVLIETLAEAVLRAADGR--------PYALLGYS-SSGWLAQAAATWLEE-------RGTGPVGVVLLDTYPP--DSMTL-------------EMRKAMTYEVVE--R------------------------------------RMR--SMHYDGLTALGTYRGM--FRGWQP--------------------RQLAVP--------------------------------------------------------------------------TLFVRPDSCI-------PGSPEEP-MAGP------DWQAAWPLDHEETQVPGDHCTMIGEFSE----TTAAAVDEWL---------
>AFV96142.1|gb|JX477167.0| Cyanobacteria - Cylindrospermum licheniforme UTEX B 2014 Cylindrocyclophane T1PKS-T2PKS-T3PKS Thioesterase
---RLFCFPHAGA-SSYIFNSWPEKFASK----IEVCPIQLPGRGNRVKEP------AKIKP--LVQTFAPLLKPYLDV---------PFAFFGHS-MGALLSFELARELRRQ------NYPNPDYLFVGGYRAPHIP-DLNLPIYKLPEP---------------------------------KFIQAISGYGGIPENMLQDPFFLQTFLPTFRADFELLDTYFHTKEE--------------------------------------------------------------------------------------------------PLESPIYIFGGLEDHTVGIKELSG-----------------WEEQTKA---------------------------------------------
>tubF|gb|GU002154.1| Proteobacteria (Delta) - Cystobacter sp. SBCb004 Tubulysin NRPS-T1PKS Thioesterase
---PFFWAANLLG-TVFPYFALARCLAP-----HPFYALQPPGLEEGQEPV--------EKLEDLAALYVHEIRRLQP--HG------PYRLGGWS-FGCVVAYEVARQLEAA-------GEQVALLVLLDFPAPAERTAAS-------------VWAAARFGSV---------------------VRGLA----------PYAVEYFDLLARAPREPDGAARVRESLARGWERMRRGGLLRELWDEAALSRVMPGDSRLLLREPGIA------------------------------PMVRLARAHQRAMMD----------------YRPTGRLQQRILLWRSEAHARGFAPDL------------GWGALSAAGVEVHETPGDHLSLLRPPH---------VEQIAAQLLSLL-----
>chiF|gb|DQ065771.0| Proteobacteria (Delta) - Sorangium cellulosum Chivosazol T1PKS-TRANSATPKS-NRPS Thioesterase
----SFWCHGALG-FGQIFRPLSAALGED----YPVYALQARGVDGTRLPF--------HRLEDMLTHYVACIRSVQP--RG------PYCIGGYS-SGGILALELARELHRQ-------GETVARVILLDTYPSTPEVQRW-------------FAGFMDDDYL---------------------HVAVAAMLFAPGR--ADGLVSVEELQGTPPEVRLGHLASLLAERLGAGWSRDEIYILLQGAVNVARYTGQALHGYEPSRYNA------------------------------SDVLYFRAAAGFVDP----------------GRAGSGLTRGVGPDAPDHVAP-------------------WRDIVASRLDVVSVPADHFSLLSGPG---------LAVIKEHL---------
>MAV 0218|gb|CP000479.1| Actinobacteria - Mycobacterium avium 104 T1PKS Thioesterase
---PVFVFHPAGG-STVVYEPLLKRLPPD----TPMYGFERVEG----------------SVQERAAQYVPKLLELNE--DN------PFVLVGWS-LGGALAYACAIGLKRA-------GADVRFVGLIDT--------------------------------------------------------------------------VRAGEEIPQTKEETRKRWDRYARFAERTFNVEIPAIPYEQLE---ELDDEGQVKFVLDIVQQ------------------------------SGV------------------------------------------------------------------------------------------------------------------------
>MAV 3056|gb|CP000479.1| Actinobacteria - Mycobacterium avium 104 NRPS Thioesterase
---PLFCIHAAGG-LSWSYQVLGNHLD------CPIIGIQQA--EPQHA--------APRSIREMAQSYADRIQETYPDG--------PYHLVGWS-FGGVVAHELAIELQRR-------GCAIARLVLLDAQPGLDGSVTA-------------P---------------------------DAALAEQHMMEEALR--------------SHLAAADHDQPHAHRQFNQLVREAGAEG-----------MSRHKRLFDVLFGNARN-----------NIERSKI------------HEPGVFLGD--------------------------VTIFSAVRDHEDRSAFLAEN----------------WRPYVAGDIVIH--EIDCTH-DEILN------ADVVDSYGQRL---------
>MAP 0220|gb|AE016958.1| Actinobacteria - Mycobacterium avium subsp. paratuberculosis K-10 T1PKS Thioesterase
---PVFVFHPAGG-STVVYEPLLKRLPPD----TPMYGFERVEG----------------SVQERAAQYVPKLLELNG--DN------PFVLVGWS-LGGALAYACAIGLKRA-------GADVRFVGLIDT--------------------------------------------------------------------------VRAGEEIPQTKEETRKRWDRYARFAERTFNVEIPAIPYEQLE---ELDDEGQVKFVLDIVQQ------------------------------SGV------------------------------------------------------------------------------------------------------------------------
>MAP 3742|gb|AE016958.1| Actinobacteria - Mycobacterium avium subsp. paratuberculosis K-10 NRPS-T1PKS Thioesterase
----AVCVHDGSG-GLAPYEQLVSELRSAADGAPELYGLRRVAGDAYSRIAP------PELFTTLASRYGAAITALAPS---------KVHLVGYC-MGGLLATEIAKCLEES-------GIVVAPVTVVSSYRVPFDIEDD---------------------------------------------DILDYCFAQIMGVSPSDLGLRVADDAIRAAFAAVRSRHAD-LIPPGALRAVAAPELASALD--------QSAAPGEQRLKL-------------------------------LAQSG--VLGDSWTA----------------ESLTELRAIFVHSLRSVVQGAADPFLGDVHFLRQRGDIHFLPTLKEDMTEFWRGYCLGELTITEIDGNHFDCLTGENARSVAGLLLGS---
>MAP 1420|gb|AE016958.1| Actinobacteria - Mycobacterium avium subsp. paratuberculosis K-10 NRPS Thioesterase
---PLFCIHAAGG-LSWSYQVLGNHLD------CPIIGIQQA--EPQHA--------APRSIREMAQSYADRIQETYPDG--------PYHLVGWS-FGGVVAHELAIELQRR-------GCAIARLVLLDAQPGLDGSVTA-------------P---------------------------DAALAEQHMMEEALR--------------SHLAAADHDQPHAHRQFNQLVREAGAEG-----------MSRHKRLFDVLFGNARN-----------NIERSKI------------HEPGVFLGD--------------------------VTIFSAVRDHEDRSAFLAEN----------------WRPYVAGDIVIH--EIDCTH-DEILN------ADVVDSYGQRL---------
>MSMEG 0019|gb|CP000480.1| Actinobacteria - Mycobacterium smegmatis str. MC2 155 NRPS Thioesterase
---PLFCVHPASG-LSWQFAGLKRHLPRQ----IPIYGLQSPLFT---------GTPLPESIAELTARYADTIVAVAPSG--------PVRLLGWS-FGGSMALLIAQELSRR-------GREVTFVGMLDARTDTADPN-A-------------GFDPEAVLAG------------------LLREMGFGVD--PQARM----------------TVADAVALVRDTDDAITVLDDE---------------QIALVIENYVAA-------------ERLTAD--------------ADYGRYDGD--------------------------VFFVDAT-ILEMDLAGVASR------------G---WHDHVGGRLKVA--ELDCRH-SELMD------AEVLERLGPLI---------
>Mjls 5391|gb|CP000580.1| Actinobacteria - Mycobacterium sp. JLS T1PKS Thioesterase
---PVFVFHPAGG-STVVYEPLMKRLPPD----TPIYGIERVEG----------------SVEERAAEYVPKLLEMNGWTEGRSG--VPFILAGWS-LGGVLAYACAIGLKQA-------GADVRFVGLIDA--------------------------------------------------------------------------VRAGEEVPQTKEETRARWERYARFAERTFNVQIPEIPYEELE---NLDDEGQVRFVMEAVAA------------------------------SGVQIPGGIIEHQR-------------------------TSYLDNRMIDTAE--------------------IKPYDGHVTLYMADRYHDDAIYFEP---------RYATRQPDGGWGEYVSE
>Mkms 5098|gb|CP000518.1| Actinobacteria - Mycobacterium sp. KMS T1PKS Thioesterase
---PVFVFHPAGG-STVVYEPLMKRLPPD----TPIYGIERVEG----------------SVEERAAEYVPKLLEMNGWTEGRSG--VPFILAGWS-LGGVLAYACAIGLKQA-------GADVRFVGLIDA--------------------------------------------------------------------------VRAGEEVPQTKEETRARWERYARFAERTFNVQIPEIPYEELE---NLDDEGQVRFVMEAVAA------------------------------SGVQIPGGIIEHQR-------------------------TSYLDNRMIDTAE--------------------IKPYDGHVTLYMADRYHDDAIYFEP---------RYATRQPDGGWGEYVSE
>Mmcs 5010|gb|CP000384.1| Actinobacteria - Mycobacterium sp. MCS T1PKS Thioesterase
---PVFVFHPAGG-STVVYEPLMKRLPPD----TPIYGIERVEG----------------SVEERAAEYVPKLLEMNGWTEGRSG--VPFILAGWS-LGGVLAYACAIGLKQA-------GADVRFVGLIDA--------------------------------------------------------------------------VRAGEEVPQTKEETRARWERYARFAERTFNVQIPEIPYEELE---NLDDEGQVRFVMEAVAA------------------------------SGVQIPGGIIEHQR-------------------------TSYLDNRMIDTAE--------------------IKPYDGHVTLYMADRYHDDAIYFEP---------RYATRQPDGGWGEYVSE
>SAMR0474|gb|AM238664.2| Actinobacteria - Streptomyces ambofaciens ATCC 23877 T1PKS Thioesterase
---LVCVSGLTAGGGPQEFVRLAAPLRG----ARRVAAVPVLGYGR--GE------LLPATPEVALDWQARGILAHAQDT--------PVVLFGHS-GGAILAHRLAVRLA-DLG------APPAGLVLADVYR----LDDP-------------LMADWSAELS-------------------------EGVFDRAEQFV------PMDD----SRLTAMTWYGGL--FWEIP-------------------RPD-TRVP--------------------------------------------------------------------------TLLLRASEPLREPA---DGR-------------DWRSSWKAARD--IVDVPGNHFTMMA--EH--AGTTARAVHRWI---------
>cce 3761|gb|CP000806.1| Cyanobacteria - Cyanothece sp. ATCC 51142 T1PKS Thioesterase
---RLFCLHHLGG-NASLFQKWSSELEPK----VEVVPLQILRKSQNINQT------NENQFHLLIEAMEKVLAPYLDK---------PFAIYGHS-MGAIMAFELAQKLSQT------QGKLLQHLFVSSSFSPQKINRVLKEN--------------------------------------QLSLEEILNVSEIPEEIRQDSSMMEEITSIFQVDLQLLKSYVYTKNS--------------------------------------------------------------------------------------------------PLNCPISTFGGKGDPLIKQEDLLP-----------------WADHTHIGFR--FMMFPGNHMFLMGKSHKLLLQTILKEI-------------
>SPO0849|gb|NC 003911.11| Proteobacteria (Alpha) - Ruegeria pomeroyi DSS-3 T1PKS Thioesterase
---PFFVVAGMFG-NVLNLRHLALMLGRD----RTVYGLQARGLVGEDAPH--------ETIPEAARDYIAEMRQVQP--HG------PYLLGGFS-GGGIIAYEIAQQLRDA-------GEEVALLVLLDTPLP-------------------------QRPPL---------------------GRSDKALIKLQQFRERGPR-YLVDWVK--ARFAW-------EV------------------------------------------------------------------------------------------------------------------------------------------------------------------------------------------------
>LYNGBM3L 57760|gb|GL890964.1| Cyanobacteria - Moorea producta 3L NRPS-T1PKS Thioesterase
---PFFCIHGQQG-NVLNLRELAKSIGSE----QPFYGLQAKGLDGKQMPD--------FTIEAMAANYLKEIRSVQA--HG------PYFIGGNS-MGGTIAFETAQQLQQQ-------GEKVALLVMFDTFNKS------------------------AFPRL---------------------VFRNQHYFKYLSQLGLS-KSLFEELKDVTKR---QLQAILC----KLYLGLGKPLPHHLSRAIVAEANMQAKWAYSP-QVYS------------------------------GKITMFRAKKPAKF--------------------NKFYLPNQADWETRDPEQ------------------GWGNLASDKLEIYDVPGDHYSIFDQPN---------VQVLAETLKACL-----
>teg8|gb|EU874253.1| Unknown - uncultured soil bacterium NRPS Thioesterase
---PLFCVHASGG-LSWNYGPLLRHLPSN----QPVYGVQARGLARTEP--------LAGSVEEMAADYLEQIRIVQPTG--------PYHLLGWS-LGGRIAQTMAALLEAE-------GEEVGMLALLDAYPTYMG-------------------------------------------------------RKSSR-------------------DEEALERRKEQDLEHAGALVQ------------GAGARSRLEAVMRNL-------------WEVGPRH--------------TAPRFAGD--------------------------ILLFVASVDR--PEHLQVA------------DAIASWEDFTSGTIEP--HEIPTNH-FEMVQ------PAALAQIGSIVAEKL-----
>veg9|gb|EU874252.1| Unknown - uncultured soil bacterium NRPS Thioesterase
---PLFCVHASGG-LSWNYEPLLRHLPAN----QPVYGVQARGLARTEP--------LPGSVEEMAADYLEQIQAVQPTG--------PYYLLGWS-LGGRVAQAIARLLEAQ-------GEKIGLLTLLDAYPVYMG-------------------------------------------------------RNATGTVT-----------EQAERDEEAMEKRNQKDLELAGQLVK------------GAAARSRLEAVMRNL-------------WEVGPRH--------------TASPFNGD--------------------------ILLFVATVDR--PQHLPVA------------VAAASWKDYTTGTIES--HEIASNH-YDMVQ------PAALAQIGAIVAEKL-----
>ADK54821.1|gb|GQ475282.1| Unknown - uncultured soil bacterium T3PKS-NRPS Thioesterase
---PLFCIHPSSG-LSWCYTDLVGHLPPD----RPVYGLQARGYGADEL--------LPRTLEEMAADYFKQIRAVQPSG--------PYHLLGWS-FGGTTAHAVATHIQEQ-------GEEVALLAVLDGYPLHADT--------------------------------------------------------PEGG----------------PNAEKRTKVRL----------------------------LSEIRKVNDNN-------------LQLLKNF--------------TPGLFRGD--------------------------LLLFVAAEGR--PDHSPAV------------EAPDSWAPYIDGAIDS--IQIRSDH-DGMLT------AKPVTEIGRLVSERL-----
>Francci3 2459|gb|NC 007777.1| Actinobacteria - Frankia sp. CcI3 NRPS-T3PKS Thioesterase
---ALFCVHPVEG-ISWRYTGLADHLPAD----LPIYGLQARGLARTEP--------LPRTVADMAADYFERIRSVQPTG--------PYHLLGWS-LGGVVAHALATHIQAR-------GEQVGLLAILDGYPASTAVR-----------------------------------------------------SRPEDGR------------EVMPKVRGKMDQRLDRMIEQVVGRGDVGRG------DVDGERLRRIRSVLDNT-------------MRLGAEF--------------TPDVLHGD--------------------------LLLFVALLDR--LPSQPAA------------EAPTLWRPYVDGRIDG--HEISGAH-QELMQ------AEHLAEIARVITEKL-----
>Francci3 2981|gb|NC 007777.1| Actinobacteria - Frankia sp. CcI3 T1PKS Thioesterase
--TIVCLPSMVAPSGPHNFARLALHLHG----RRDVYALPHPGFG----DGE----LLPATADLVVDLHAETIARAFDEI--------PLVLAGYS-SGGWLAHAIAARLET-------RGIHPRAVVLLDTWLPGDRIPEG-------------DIQEELRGVALNDQ---------------------------------------AFALMTEAQVTAQGAYLDL--FEGWRP--------------------TAVNAP--------------------------------------------------------------------------VVLVRAMERM-------PQQAVAENPDGEGQ----AWVTDWVMEHERLDAAGNHQTMMNEHAA----STAAVLHQWL---------
>Mvan 5640|gb|CP000511.1| Actinobacteria - Mycobacterium vanbaalenii PYR-1 T1PKS Thioesterase
---PVFVFHPAGG-TTVVYEPLMKRLPAD----TPVYGIERVEG----------------SIEERAREYVPKLMEIQG--NG------PYILAGWS-LGGALAYACAVGLKSQ-------GADVKFVGLIDT--------------------------------------------------------------------------VRAGEEVPQTKEEIRARWDRYALFAQRTFNVEIPAIPYEQLE---ELDDEGQVKFVLDAVKD------------------------------SGVDIPGGIIEHQR-------------------------TSYLDNRALDTAV--------------------IENYDGHVTLYMADRYHDDA-------------------------------
>SADFL11 1546|gb|EQ973121.1| Proteobacteria (Alpha) - Labrenzia alexandrii DFL-11 T1PKS Thioesterase
---PLFICAGMFG-NILNLRQLAVLVGRD----RPVYGLQARGLFGNQEPH--------ETFEEMARDYLAEIRQVQP--HG------PYMLGGFS-GGGIVAYEMAQQLAAQ-------GEEVAEVILLDTPVP-------------------------EQVHL---------------------SLVDRVMIKWQDLQKNKTK-FFSVWLR--NRREWR-----ARTEAQQNAAGDQATADSFNNERIRLAFMRAHDAYEV-RPYS------------------------------GPVVLYRPKANVLY--------------------RISGGRRLQDGLNILRED------------------NGWSPFVSELSIVEVPGDHDSMVLNPN---------IQVLAS-----------
>Mspyr1 50180|gb|NC 014814.0| Actinobacteria - Mycobacterium gilvum Spyr1 T1PKS Thioesterase
---PVFVFHPAGG-STVVYEPLLKRLPAD----TPMYGFERVEG----------------SVEERAAEYIPKLREIQG--DG------PYILVGWS-LGGALAYACAIGLKRE-------GADVRFVGLIDM--------------------------------------------------------------------------VRPGEEIPQTKEETRARWDRYALFAQRTFNVEIPEIPYEELE---ALDDGGQVQFILDAVRE------------------------------SGVDIPGGIIEHQR-------------------------TSYLDNRLLETAE--------------------IQPYDGHVTLYMADRYHD---------------------------------
>tugD|gb|GQ981381.0| Proteobacteria (Delta) - Chondromyces crocatus T1PKS-NRPS Thioesterase
--RLICFPTVTPPTGSIQYARFAAALEG----HRDVWVLPNPGFA----EGE----PLPRDRATLVQQHAESVLRCADGA--------PFALVGCS-SGGWIAHAVASHLER-------QGTSPAALALLDTYLM--RDIPA-------------RIESVFKRAWLT--S------------------------------------LPDVPRT-TDELTAMPWYATL--FSDWSP--------------------EPLAAP--------------------------------------------------------------------------TLFIHVTDPM-------PGMADD---GST------AWKTRWDLPHTAATLPGDH--ILNDQAE----T------------------
>SACE 4138|gb|AM420293.0| Actinobacteria - Saccharopolyspora erythraea NRRL 2338 T1PKS Thioesterase
--ELVCLPSVLATSGAHQYARFATALRG----RRSVCSLTLPGFA----AGE----PLPANLDALVDAAAHAVRARIGDA--------PAALVGYS-SGGLLAHPVAAALER-------DGARPAAIVLIDTFPPG-----S-------------GLTPAVLDGMFAR--------------------------------------LAGLDALNDARLTAMGGYLRL--LSDWKP--------------------AEIGAP--------------------------------------------------------------------------VLLGHAAE------------PPQDAPD-----------RQWHQPHHGAVLPGDH--VLEDHAT----STAEIVHEWL---------
>SACE 4279|gb|NC 009142.1| Actinobacteria - Saccharopolyspora erythraea NRRL 2338 NRPS-T1PKS Thioesterase
---GLVVFPYAGG-GPVNFHSFAQALQSRG---IAVHAVELPGHDLGADAG------SFAELEQIVKEVVAEIG-GLGL--------RTVSLWGHS-AGAAFAAYAARLLEEQ-------GTAVHQVIVAARAMDTVEELQADIAEAGSLSLERIKQ-------------------------------RLSAQEAFRELAQLRTEHADNVAQAYRHDVRSAAQYLVDVQVNPPQP---------------------------------------------------------------------------------------------RLSAPLTVVFAEGDPGKAEGLARH-----------------HRWEAVARHVDHRQISGGGHYFLATHAAEAAAVVRG----------------
>SACE 4287|gb|NC 009142.1| Actinobacteria - Saccharopolyspora erythraea NRRL 2338 NRPS-T1PKS Thioesterase
---ALFCVHPATG-LSWCYSGLLRHT--D----MPLHGLQLRGIDG-RDP-------LPASLGELASDYADQIQKVRPHG--------PYHLLGYS-LGGNIAHAVAAELHSR-------GEQVGMLAMLDSSTSD--------------------LGLAEDE----------------VLARLFDDV-----VGDTE---------RGSAEHQRR---RIAQALGEGVLS---VLPARHLPS----------AVDAIVNSVR-----------------LAAGH--------------RPDVVDGD--------------------------VLLVTSRS-----NDDLGP----------------QWEPYVRGRVCV--ERVDCTH-DEMLG------SGPLGEIAALVRQ-------
>SACE 2696|gb|NC 009142.1| Actinobacteria - Saccharopolyspora erythraea NRRL 2338 NRPS Thioesterase
---GLFCVHPKLG-LAWMYSGLLPHLGRE----RPVYGLQATGIDPDHR--------QAPDITYLAHTYAERIVEQQPEG--------PYYLLGWS-LGGRIAQLAGCVLESW-------GHEVPLLVLLDAHAEVGGAVAD-------------D---------------------------DAPPDRSTLYHRWLERAGY--------DVSGLEPTEVTPATVRRYAAEFGGVFGGLD-----------EEDIHELVNSLLAITR-------------IDRS--------------AEPGVFGGE--------------------------VLFFSARGGDSK----AIDE----------------WRPYLTGTVHEH--EVDFDH-DDLMA------PNSLAQIGP-----------
>Tcur 1888|gb|NC 013510.1| Actinobacteria - Thermomonospora curvata DSM 43183 NRPS Thioesterase
---PLFFVHPAGG-LAWPYFQFQRHLGPE----QPIYGLQAR-VSGT----------LPESVNAMAADYLEQIRTVQPHG--------PYHLAGWS-LGGLIAYEMACRLQAD-------GEEVALLALIDSYHSQDLNSEK-----------------------------------REVLPELLEAAGIDAGMKADG----------------TPDMDRIMQVIRERGDAFATLDE---------------DDLLKLYRNYENG-------------LRCAEEY--------------RPGRFRGD--------------------------IVF--ATQGR--PDGAPTAR--------------ENWQPVTDGQIED--YPIDVEH-HLLME------PGPAAEIGAVL---------
>Tcur 4756|gb|NC 013510.1| Actinobacteria - Thermomonospora curvata DSM 43183 T1PKS Thioesterase
---PIFIAHPAGG-TTSCYLQLVALLGEE----QPVYGLERFDDAP--------------SVEERAARYVEHLLQAQP--EG------PFRLGGWS-FGGVLAYETARQLTAA-------GREVELVALFDA--------------------------------------------------------------------------GIP-REVEDESDALARRFAAFADYLNETYNLGVE-LSYEELA---GLDEEAQFALVMERAAG------------------------------LAELLPPAVLHHQL-------------------------TSHQDTRSLEAYR--------------------PEPYEGRV-------------------------------------------
>Dtox 2674|gb|CP001720.0| Firmicutes - Desulfotomaculum acetoxidans DSM 771 NRPS Thioesterase
------LFHNGTG-TLTAYNSLLPYLINDPNRTEKIVGFGDEKEYLSNP--------YDKTIESLGQKYGDLLLQQEASG---------YKLIGYC-IGGLIALETARVLMEA-------GARVEPVTTISTSFCKRRNSNG-------------------------------------------------------------------------AEDEVLLNTIRTSLNNDLLMER-----------------------------------------------------------------------------------------------------------------------------------AFCRVVGAEVSKAGHNVDDELLKKAIS--------------------------
>TMO 0595|gb|NC 017956.1| Proteobacteria (Alpha) - Tistrella mobilis KA081020-065 NRPS Thioesterase
---PVFLIPPVAG-EPAIFLDLAARLGQT------AWGLRFPAHP-------------AAGLPEFARHLARTVLEIAPRG--------PWRLIGYS-LGGMAAFDAARLIEAET------GGRVDLVLLDTSAEPVPMHPDA-----------------------------------------------------------VAAKFDREFARAAADSTDAMGRLAAGLGRPAVARLKAR------------VLRNARATTGWRARG---------------------------------------------------------------------VIHGDITMITARRDPAERRPE--------------RWAAHTTGRFRLIGLDAGHFDLLSDR-------MMPDLVRALAPA------
>VAB18032 07080|gb|NC 015434.0| Actinobacteria - Verrucosispora maris AB-18-032 NRPS Thioesterase
---PLILVHPVGG-DLLCYRPLLAELGER----HRVLGLAAPSPAQLEV-----------TIEELAAGYLAELAPTLANEPPDR----PIRLAGWS-LGGVVAYEMARQLRR--------EGRECAVLLIDPWVGCGAHP----------------------------------------------TVDDTALVKAFLHNLAGAPVEVPVDPCTPNVAQETLRRIWAAPPPQLKELKSMTYAEVQAMYDVFEANTRALLRYSLVPE-DG-----------------------------LELDVVEAS------------------------------RGLVGPAAGYLSPLR--------------------HAAAKLPARFHMLEADH-VVDGEH--------ADAVARLIDE-------
>VAB18032 19000|gb|NC 015434.0| Actinobacteria - Verrucosispora maris AB-18-032 NRPS Thioesterase
---TLVCVPYGGG-SAVVYQPLADALPPGH----RLLSVAVPGHDIGVADD------PAP-IDQVAADVVAEILDRVS---------GPLILYGHCGPGGALVVEVARRLEAA-------GRELTAVYLGAVFPFGRPAGGLLGPLLRLRLAERLRSD---------------------------RIYRTWLQAQGTNIGQLAPDEVRFLIRAMRHDAEVSEEYELMRRRVTP------------------------------------------------------------------------------------------------LRAPIISVVGERDRGTEFHEERY-----------------REWHFLSDRTALAVIDEGGHYFLKYRAVELAEIVTDVHR-------------
>VAB18032 22195|gb|NC 015434.0| Actinobacteria - Verrucosispora maris AB-18-032 NRPS Thioesterase
---TVVTVPDAAG-TALNFQPLAAGLAATN---CALLATELPGHDLARPEE------PLADVAQVATRLADEIAARVD---------TPLILWGQG-SGAAVAVQCARLLHDR-------GRPAAQLVLAAAT-ADPHQLAADLAEVQAMGEGEIRR-------------------------------HMAAQATYTELDELKSEREALIERAYRHDTLGAARFLQHARDGWP-----------------------------------------------------------------------------------------------ALTVPTWVVVGDDDMRLATEPRPE-----------------LAWRHFAPTAEQVVLPGAGRHFLRTHADEVVTLLRSIVT-------------
>VAB18032 22305|gb|NC 015434.0| Actinobacteria - Verrucosispora maris AB-18-032 NRPS Thioesterase
---PLFCVHP--G-LSWGYAGLARHLESD----RPLYGLQSPLLTD-PDS-------AEADVAALAERYLERIRAVAPQG--------PYHLLGWS-FGGLVAHEIAVRLRER-------GEQVGVLALLDAYPVPQ-QGPA-------------AQPPTPAE----------------VLGVLTGDP----ELRRTD---------HGLSVLPDD--EELARLVREANPALAQLRTAEIAGI-----------ARAAAGHVE-----------------AMRHH--------------LPRRYDGD--------------------------LLFVTATEDR--PEQAPTAD---------------VWEPYVGGQVTR--VDVAANH-WSMTE------PAPLARIGAALR--------
>VAB18032 24915|gb|NC 015434.0| Actinobacteria - Verrucosispora maris AB-18-032 T1PKS-NRPS Thioesterase
---PLFCVHPGAG-MSWSYAGLARHLGPE----QPIYGLQTRALSL-PGY-------RAAGVPELAEEYLAEIRRVQPHG--------PYRLLGWS-FGGVVAHAMATALQQT-------GEEVELLAMMDAYPVS--VEEA-------------ARPRTERE----------------TMLMLLGDDD--GETGELP---------DGLLDRYDP--AAVVEVLRRRDPVLAGP--GEVHAL-----------VRAAVNHAD-----------------IMAAY--------------RPGVVAGD--------------------------LLFFSAGRAG--VADGPAPK---------------LWEEHFSGVIEW--HDVATTH-LRMTE------REPLAEIGEKLAARL-----
>tgaC|gb|GQ981380.1| Proteobacteria (Delta) - Sorangium cellulosum T1PKS-NRPS Thioesterase
--AVLCFPTVTPPTGSIQYARFASTLSG----LRDVWVLPNPGFG----HDE----PLPEDRATVVRAHAESVVRCAGGA--------PFVLLGTS-SGGWIAHAVASHLEG-------LGISPAALVLLDTYLM--RDVSA-------------ATATALQRAWIG--Y------------------------------------LPSVPRT-DNE--AMPWYSEL--FEDWVP--------------------APLAAP--------------------------------------------------------------------------TLLVRVTEPM-------PGMEGEVVPGSG------DWRTHWEQAQAVMDLPGNH--ILTDHAD----TTARLVHDWL---------
>RGBS107 02943|gb|DS544878.1| Proteobacteria (Alpha) - Phaeobacter gallaeciensis BS107 NRPS Thioesterase
---PLFGVHVLGR-NEEFYRPLAAALGPD----QPVYGLSIGLLDSR----------TPTGVRATAKLYLEEIQTHYPSG--------VVHLAAVS-LGSYFAFELARQLLAA-------GRDLGLVALFDAEGPAGRSRVQG----------------------------------------RARLGAHLGLLRRMGPAYLGHVARHRIETLRNSFERRRLEWTGGGGALSIEALIAAN--------------QQSVERYTPDPLATP----------------------------------------------------------------LTVFRAGDDLFDSPEALTQG----------------LGWAPVAAAGFELIEVPGSHLSILQE-------PNVQDMARHMTRIM-----
>RGBS107 09711|gb|DS544878.1| Proteobacteria (Alpha) - Phaeobacter gallaeciensis BS107 T1PKS Thioesterase
---PFFLVAGMFG-NVLNLRHLALMVGKD----RPVYGLQARGLIGEDAPH--------DRLDEAARDYLVEIRSVQP--DG------PYLLGGFS-GGGLTAYEMAQQLQAE-------GEETAALILLDTPLP-------------------------LRPEL---------------------SRRDKALIKWAELRSKGIG-YLGEWIG--NRIAW-------EIEKRRYAASGDSAAPVFNNRKVELAFRAALPVYDL-QPWS------------------------------GPLTLFRPPLDRHW--------------------QVSAGNWVSREREYVFDD------------------NDWTRWAPAVEVVEVPGDHDSMVL-----------------------------
>Mflv 1169|gb|NC 009338.1| Actinobacteria - Mycobacterium gilvum PYR-GCK T1PKS Thioesterase
---PVFVFHPAGG-STVVYEPLLKRLPAD----TPMYGFERVEG----------------SVEERAAEYIPKLREIQG--DG------PYILVGWS-LGGALAYACAIGLKRE-------GADVRFVGLIDM--------------------------------------------------------------------------VRPGEEIPQTKEETRARWDRYALFAQRTFNVEIPEIPYEELE---ALDDGGQVQFILDAVRE------------------------------SGVDIPGGIIEHQR-------------------------TSYLDNRLLETAE--------------------IQPYDGHVTLYMADRYHD---------------------------------
>MSMEG 0019|gb|NC 008596.1| Actinobacteria - Mycobacterium smegmatis str. MC2 155 NRPS Thioesterase
---PLFCVHPASG-LSWQFAGLKRHLPRQ----IPIYGLQSPL-----------GTPLPESIAELTARYADTIVAVAPSG--------PVRLLGWS-FGGSMALLIAQELSRR-------GREVTFVGMLDARTDTADPN-A-------------GFDPEAVLAG------------------LLREMGFGVD--PQARM----------------TVADAVALVRDTDDAITVLDDE---------------QIALVIENYVAA-------------ERLTAD--------------ADYGRYDGD--------------------------VFFVDAT-ILEMDLAGVASR------------G---WHDHVGGRLKVA--ELDCRH-SELMD------AEVLERLGPLI---------
>MSMEG 6392|gb|CP000480.1| Actinobacteria - Mycobacterium smegmatis str. MC2 155 T1PKS Thioesterase
---PLFVFHPAGG-STVVYEPLMKRLPAD----VPVYGLERVEG----------------SIEERAAEYVPKLLEMHK---G------PFVLAGWS-LGGALAYACAIGLKQS-------GADVRFVGLIDT--------------------------------------------------------------------------VLPGEPIDQSKEGMRARWDRYARFAERTFNVEIPAIPYEELE---KLDDEGQVKYVLEIVKE------------------------------S--------------------------------------------------------------------------------------------------------------------------
>Rv3800c|gb|NC 000962.2| Actinobacteria - Mycobacterium tuberculosis H37Rv T1PKS Thioesterase
---PVFVFHPAGG-STVVYEPLLGRLPAD----TPMYGFERVEG----------------SIEERAQQYVPKLIEMQG--DG------PYVLVGWS-LGGVLAYACAIGLRRL-------GKDVRFVGLIDA--------------------------------------------------------------------------VRAGEEIPQTKEEIRKRWDRYAAFAEKTFNVTIPAIPYEQLE---ELDDEGQVRFVLDAVSQ------------------------------SGVQIPAGIIEHQR-------------------------TSY---------------------------------------------------------------------------------
>Rv0405|gb|NC 000962.2| Actinobacteria - Mycobacterium tuberculosis H37Rv T1PKS Thioesterase
----ICIPTLTVLSDQREYRDIANAMTG----RHSVYSLTLPGFD----SSD----ALPQNADMIVETVSNAIIDVVGGS-------CRFVLSGYS-SGGVLAYALCSHLSVK------HQRNPLGVALIDTYLPSQIANPS-------------MNEGFSPNDTGKGLSREVIR------------------------------VARMLNRLTATRLTAAATYAAI--FQAWEP--------------------GRSMAP--------------------------------------------------------------------------VLNIVAKDRIATVENLREERIN------------RWRTAAAEAAYSVAEVPGDHFGMMSTSSE----AIATEIHDWI---------
>ykris0001 35400|gb|NZ ACCA01000001.1| Proteobacteria (Gamma) - Yersinia kristensenii ATCC 33638 TRANSATPKS-T1PKS Thioesterase
----KLFMIPSMGAGATMFAHFLYNPPED----CEVYSVQLPGRENRLHDALYT--HLTPLLNDLEKVLIDVLAEDKQQHNWQG----GVVIYGHS-YGGIIAFELCRLLRRK------YGITPIHFFASATMPPQLTGKWK----------------------------------------------------------NQDTMRESSITSNSAQKILGLLSYIDDADFINKVLPGMRR-------------DMPLLMSYDYQDDSP-------------------------------------------------------------LSCPITVFSAIEDEVTQAEEMAL-----------------WAEQTTSRFQQYLVHGDHWFVSRNKE-------FIGEKIAAEL---------
>SVEN 0485|gb|FR845719.0| Actinobacteria - Streptomyces venezuelae ATCC 10712 T1PKS-NRPS-T3PKS Thioesterase
--TVVCLPSFSAIAGVHVYARFADAFGD----GWRVAALAHPGFV----PGE----PLPDSVDVLAELHARTVLDTVGAD--------PFLLVGRS-AGGWVAHEVAAVLER-------MGRAPDGVALLDTPARADD---P-------------RGHAVMVGGMLERD--------------------------------------SRLVTIDDYRLTAMGGYSRL--FREWKP--------------------EPIAAA--------------------------------------------------------------------------TLLVH---------------AATPYGADE------ARIASWDLPHQAVKVTGDH--MLERHSA----TTAEAVEQWSR--------
>SVEN 0517|gb|FR845719.0| Actinobacteria - Streptomyces venezuelae ATCC 10712 T1PKS-NRPS-T3PKS Thioesterase
----RVLVHDGTG-TLIPYRSVIRELADRLP----LAGLVVDDIDAFLKADP------RTQVAELAERHAEALLAEGLG---------RVHLVGYC-MGGLLVPELARRLTAA-------GAEVTGLTVISSYRVPYLVEDD---------------------------------------------LLAEYIFARLMRADLVGLGYPRDE-TATRELVRATTEHFGNTVPPGSLVDRPEPLLTAKGQEALRAFRLLAGRPQEERLRA-------------------------------IGASMPVEDAELRSE----------------ERLSRLYAIVKHSLVSVASHEATPSDLPATFVRQTGEAEIFPGMHRDMTDYWQQVCGAGLRVVDVPGDHFSCVQPPHAAAVARALLAE---
>SVEN 6202|gb|FR845719.0| Actinobacteria - Streptomyces venezuelae ATCC 10712 NRPS Thioesterase
---PLVLVHPVGG-DVLCYRPLLTRLTRT----YTVWGLRAPGTLGERP-----------PLDSVAALAREYATELRPLFADGS----PVRLAGWS-FGSVVAHETARLLTTGAD----AVAARADVVMLDPWLADGDTT----------------------------------------------AGED-ELIRSFFVNLSGGRAAVPARPLAGLTGEAALARALELATAAHPALGSLTAGSLRTLYALYRAHSQALAGHRPHGA--------------------------------VRTHVLESE------------------------------QGLGGPAGRYLRPLSRVP---------------AAHAGPGAPSFLHVPGDHFSIVAEER--------ADLVAGLILGSV-----
>SVEN 7440|gb|FR845719.0| Actinobacteria - Streptomyces venezuelae ATCC 10712 NRPS Thioesterase
---PLFCVHPGSG-LAGGYAGLLRHLGPA----RPVHALQALGLGAPSEP-------LPASVEEMAADYVRRIRAVRPSG--------PYHLLGWS-FGGLVAHAMATRLQSE-------GEQVGVLAVLDAYPDNRRVLSL-------------QTALSERQ----------------WLRLLLDDVDHIEGIEGVEGVDGRLG--LGVGERPRLGITSLAEQVGAARSAGTDTLRAALRPAGLSDQLLRDPATSTLLNVARNN---------------LNLLS--------------RPGIFRGD--------------------------LFLADEAVPGLPADPAHTPG---------------EWQRHVAGSVHV--SGVAAHH-FQLLH------PGPLAQIG------------
>MT0418|gb|NC 002755.2| Actinobacteria - Mycobacterium tuberculosis CDC1551 T1PKS Thioesterase
----ICIPTLTVLSDQREYRDIANAMTG----RHSVYSLTLPGFD----SSD----ALPQNADMIVETVSNAIIDVVGGS-------CRFVLSGYS-SGGVLAYALCSHLSVK------HQRNPLGVALIDTYLPSQIANPS-------------MNEGFSPNDTGKGLSREVIR------------------------------VARMLNRLTATRLTAAATYAAI--FQAWEP--------------------GRSMAP--------------------------------------------------------------------------VLNIVAKDRIATVENLREERIN------------RWRTAAAEAAYSVAEVPGDHFGMMSTSSE----AIATEIHDWI---------
>MT2451|gb|NC 002755.2| Actinobacteria - Mycobacterium tuberculosis CDC1551 NRPS-T1PKS Thioesterase
---AVLVFPHAGG-AAAAYRWLAKSLVAN---DVDTFVVQYPQRADRRSHP------AADSIEALALELFEAGDWHLTA---------PLTLFGHC-MGAIVAFEFARLAERN-------GVPVRALWASSGQAPST-VAASGPLPTADRD---------------V----------------LADMVDLGGT---DPVLLEDEEFVELLVPAVKADYRALSGYS---------------CPPDVRIR-----------------------------------------------------------------------------------ANIHAVGGNRDHRISREMLTS-----------------WETHTSGRFT--LSHFDGGHFYLN---DH--LDAVARMVSADV---------
>MT3907|gb|NC 002755.2| Actinobacteria - Mycobacterium tuberculosis CDC1551 T1PKS Thioesterase
---PVFVFHPAGG-STVVYEPLLGRLPAD----TPMYGFERVEG----------------SIEERAQQYVPKLIEMQG--DG------PYVLVGWS-LGGVLAYACAIGLRRL-------GKDVRFVGLIDA--------------------------------------------------------------------------VRAGEEIPQTKEEIRKRWDRYAAFAEKTFNVTIPAIPYEQLE---ELDDEGQVRFVLDAVSQ------------------------------SGVQIPAGIIEHQR-------------------------TSY---------------------------------------------------------------------------------
>SAV 2895|gb|NC 003155.4| Actinobacteria - Streptomyces avermitilis MA-4680 T1PKS Thioesterase
--------------SNQELVSMATPLRG----TRDVWSLMLPGFVTGQ--------PVAADVDAAAEYALRLIEELVDGE--------PFVLAGRS-SGGRIAHEVTSRLEDR-------GLAPRGLVLIDSYMAGYDATSY-------------IVPVMESKAVEL---------------------------------------EKDFGQMTGTRLTAMAAYFG--MFEHWQP--------------------KEIATP--------------------------------------------------------------------------TLLVRASECYG-------------IEPGEVQPPAEQWQAAWPLPHEAIDVPGNHYTMLEGNGD----VTAAAVHEWL---------
>SAV 3197|gb|NC 003155.4| Actinobacteria - Streptomyces avermitilis MA-4680 NRPS Thioesterase
---ALICFPYAGG-NAINFEPLAQALDAAGG-AVAVYGVELPGHDAGRPDE------AFSSLEDTARRVVEEIRDKAGD--------RPLMLWGHC-VGSALAVETARLLEAE-------GTTPAEVFVGGKLLHDAATTRQGIEQAAAMADEDIVR-------------------------------WLVDETGFTGFDSLRPEHAAFVAGVFRHDAGSANGYLLAADEHGPKA---------------------------------------------------------------------------------------------RLSAPLTTVFTADDPLTPGHAERY-----------------TAWSLFADQPRLVELTDGGHYFCRTAAPAVADLVLSR---------------
>SAV 415|gb|NC 003155.4| Actinobacteria - Streptomyces avermitilis MA-4680 T1PKS Thioesterase
--ALMCFSPYVVPAGAHQYARFAAPFRD----RLDVWALVHPGYE----KGE----PVPSDPDVVFRLHAQTVRECAGGK--------PAVLLGYS-SGGWIAHGVAAHLEA-------MGERPAAVVMVDSFSREVP-FDH-------------QVLNAMAQAHSQRL--------------------------------------D-FMRSGGEQLTAMGRYMRL--FDDWAA--------------------PQIAAP--------------------------------------------------------------------------TLLVRASEPM-------L-AGAG---DGD------GRAAPPEHVDTIVEVTGNHYSMLEDHAG----TTAAAVDSWL---------
>SAV 865|gb|NC 003155.4| Actinobacteria - Streptomyces avermitilis MA-4680 NRPS-T1PKS Thioesterase
---PVFVMPPALG-LSWCYTPMSRWLADG----FPMYGLQSRGIRGAGP--------VGRTLTDIATDFVGELRRIQPNG--------PYQLLGWS-FGGNVAHAMAVILEAA-------GEEVSMLALLDSYP--WDGEQT-------------D-------------------------------PTLNVESAAADP---------------QLTTEELRRVLQASPGTAAAVPDE---------------YLPALAQVFANNRG---------ALLQHRSGR------------------FGGD--------------------------VLMFTAADSVAQ-GMDPRS-----------------WQKFVDGSLKTW--SVNGNH-YEVFG------PEPLETIMSVVNAEL-----
>SAV 943|gb|NC 003155.4| Actinobacteria - Streptomyces avermitilis MA-4680 T1PKS Thioesterase
--ALICLPTVAAVSSVYQYSRFAAGLNG----HRDVWYVPAPGFL----EGE----PLPSGIGAVTRMFADAIVRFTDGA--------PFALAGHS-AGGWFVYAVTSHLER-------LGVRPEAVVTMDAYLP--DDGIA-------------PVASALTSEIFD--R------------------------------------VTQFVDVDYTRLVAMGGYFRI--FSGWSP--------------------PDITTP--------------------------------------------------------------------------ALFLRGRD-------------------GE------QMPPPWGVPHTVLDIQGNHFTMLEQFAD----STARHVDEWL---------
>SCO7683|gb|NC 003888.3| Actinobacteria - Streptomyces coelicolor A3(2) T3PKS-NRPS Thioesterase
---TTVLVHAGTA-TIMPYRALITEIRRRSPGLAEVVGVEVPDLSGFLAAPP------DGLIERMAADYARALTADGRH---------RFHVVGYC-LGGLIATEVARNLAES-------GAEVESLTVISSHSPRFRLDDE---------------------------------------------LLAEYSFAVMMGIDPADLGFPDDQYRVAAAADTVLAASPG-VLPDGGLAALGGE--FEDVA---SRFRRLADVPRATRIAR-------------------------------MCEAVPASAGTYEP-----------------DHMTRLFLAFRQSVFAITRYRAEPYAGDITFLRHDG-AYPFPGSKDAVTAYWEELTLGDLDIVDIGGDHYSCLSVEHAPGILKTLGELT--
>SCO3232|gb|NC 003888.3| Actinobacteria - Streptomyces coelicolor A3(2) NRPS Thioesterase
---PVFCVHPGSG-MSWCYSGLVRHLPPG----IPVYGLQAAGLD--------GDGPLPATLQEMAAEYADLVRQTQPEG--------PYRLLGWS-LGGNVAFAMARELRAR-------GQEVELLAFLDAYPRRAGAG-P-------------EAPLAEVFAH------------------NLRDAGFDVAEEELTGG--------------RFPTARYRAFLNAAGDPMGRLDEA---------------ELAAVLEVFMNN-------------AALMRG--------------HTPGTYDGD--------------------------VLVLAAERADGDKL--ARR-------------GAESWRPHVRGRIERV--GVDADHLGLVQS------DAALAVIGRALA--------
>SCO6432|gb|NC 003888.3| Actinobacteria - Streptomyces coelicolor A3(2) NRPS Thioesterase
---VLVLVHPVGG-HLLGYRALIDALPAP----YAVYGLQAPPSGRLPA-----------TLPELAARYAREVA------ALGR----PVHLLGWS-MGGVLAAETARRTDL--------VQP-LSLTLVDSFVAATDGA----------------------------------------------DLDERAAAAGFFTDYLGQRDDV-AEIAVPAGHPDPFGHLAATHLP------REPADALRGLYDQYRALYRLLLDHRPRPLPQD-----------------------------CPLLVVPAE------------------------------RERPDAFGGLTPLHR--------------------HPAG---------------------------------------------
>nfa1890|gb|NC 006361.1| Actinobacteria - Nocardia farcinica IFM 10152 T1PKS Thioesterase
---PVFVFHPSGG-NTLVYEPLLKRLPAH----TPMYGFERVDG----------------DIEQRAKQYIPELRRIQG--DG------PFVLYGWS-LGAVFALQVAQLLRAE-------GADVRVVGLIDL--------------------------------------------------------------------------AIPTRDEDNSPEERVRRIERYQAFARKTYGIDAE-LDRAQLEELAAASDEEQFKMISDLIKI------------------------------SGAKIPGGVLEHQR-------------------------TSWIESRHLARTT--------------------PSRYDGDVVLYLADRYHDGMIELEP---------RFAERKPNGGWDEYLPH
>nfa50620|gb|NC 006361.1| Actinobacteria - Nocardia farcinica IFM 10152 NRPS Thioesterase
---PLFCVHPAGG-VAWSFAGLAAHLEPD----LDLYGLQSPVLNSAAP--------LPDSIEEWARRYVREIRAVQPEG--------PYHLLGWS-LGGVLAHAVAVQLQDE-------GQRVATLAMMDS--PRLVEP---------------V---------------------------AVSTVPVADLLGGLLGDHAAVLDAEFDPARLD--PARLAELIADLPEPFASFGAE---------------RLSRLLAEGARS-------------LDLIARY--------------RPRRYKGT--------------------------LLYFTAAHDDP---TGAGGAAG--------------WAEAVDGTVHNH--AVAATH-WRMTS------DTALARIGHVLTT-------
>nfa7180|gb|NC 006361.1| Actinobacteria - Nocardia farcinica IFM 10152 NRPS Thioesterase
---PLFCIHPLGG-IAWSFAGLAAHLETD----RPIYGLQSPALGSRES--------LPDSTEKWALRYLEEIRSVQPQG--------PYHLLGWS-LGGVLAHAIAVQLQEE-------GERVELLAMMDSYLPEAIDPSM-------------I---------------------------PAEPVPMTELLGGLLGQQVT--DLGIDDGAPG--PAELARRLAQLPEPFASFGAD---------------RIERVLTAARHS-------------LRVTAGY--------------RPHRFEGD--------------------------LVYFSAVEDEP---TGRLGADT--------------WTSAIGGRIDTH--PVPTTH-WRMTT------TAGLSAIGRVLDR-------
>nfa7190|gb|NC 006361.1| Actinobacteria - Nocardia farcinica IFM 10152 NRPS Thioesterase
---PLFCIHPFGG-IAWSFAGLAAHLGGD----RPIYGLQSPALGSDET--------LPDSTEKWALRYLEEIRSVQPRG--------PYHLLGWS-LGGVLAHAIAVQLQAE-------GEQVELLAMMDSYLRSEIAESA-------------I---------------------------PAGEAPLAELLGGLLGDDAPGVDLAVGDGVDGADPAGLARRLAELPEPFASFGAD---------------RIARVLDAAVRS-------------ATVTERY--------------RPRRFAGE--------------------------LVYFAAAEDDP---TGSVGAAT--------------WVDAVDGPIRTV--PVPTTH-WRMTT------AAGLAVIGRTLDEL------
>nfa7200|gb|NC 006361.1| Actinobacteria - Nocardia farcinica IFM 10152 NRPS Thioesterase
---PLFCLYPMAG-LSWGYAGLLPYVEQG----RPVLGLQSPALSEPDY--------LPESLGEMAARCLAEIRSVQPYG--------PYHLLGWS-LGGILAHAVAVALQEA-------GEQVALLALLDSH-----HDIA-------------A---------------------------ADFRVALRGALAEIGIQADN------LLGDSPAPA-------------LGEDELL---------------ALHAAIP----------------------------------------PE-----------------------------------------------------------------------------------------------------------------------
>nfa11050|gb|NC 006361.1| Actinobacteria - Nocardia farcinica IFM 10152 NRPS Thioesterase
---ALFCVHPSSG-MAWTYLGLADALAPG----RPIYGLQAPDLSGREP--------SPGSIEAFARRYLREIRAVQPDG--------PYHLLGWS-YGGLIAHAMAAQLAAE-------GAEVGVLALLDA---DTADIDG-------------D---------------------------SIEPLTAGTFVHTFGAVFG------IEDVPAAATAEQAAELIAARMGGAAVVDAA---------------TLERMAASYNAS-------------ARTRTGY--------------RRPVFPGD--------------------------AVYFHATVDS----SEIFGPDG--------------WRPYITGRLTSH--DIEATH-DELTA------PHVLPRIARLLDQHL-----
>nfa27950|gb|NC 006361.1| Actinobacteria - Nocardia farcinica IFM 10152 NRPS Thioesterase
---PLFCIHPASG-LAWCYRPLAEFLTGD----RPIYGLQAPQLGGEEP--------GPDSIVETARRYVAEIRGVQPHG--------PYHLLGWS-LGGLIAHAVAAEIRAA-------GEDVALLAMLDA---EVDGIDA-------------S---------------------------TVTTVTAGELIANLGPVIG------IDFVPTDATPEEAADLIRRRLGDGLAIDAA---------------AIERLTDTYNRS-------------IRAAGDW--------------EPGVLDSD--------------------------LLYFTALRDRR---PDARGHRG--------------WAPVVAGEITNV--DVDAAH-LAMTE------PSVLARIARVLDE-------
>nfa31170|gb|NC 006361.1| Actinobacteria - Nocardia farcinica IFM 10152 NRPS Thioesterase
---ALFCVPPGVG-LSWCYSGLLAHLPTD----VPVYGLQSPHVSG-AA--------GFADMTEAAEHYVAAIRSIQPHG--------PYHLLGWS-LGGLIAHEMAVQLRAA-------GEEVALLAMLDS--HRL-GERW-------------M---------------------------AVATPSAADILAEFGVEIEADA--------ADLDPIAAARLLRAQPGPFAALTDE---------------HLDALFREYRTG-------------TVLARDF--------------RPRVFDGD--------------------------LLFFHAAADEINRADPDRRAAA--------------WSPYVAGTVHEH--QVPCAH-AAMTT------PEALALIGPLL---------
>MUL 4983|gb|NC 008611.1| Actinobacteria - Mycobacterium ulcerans Agy99 T1PKS Thioesterase
---PVFVFHPAGG-STVVYEPLLNRLPAD----TPMYGFERVEG----------------SIEERAAQYVPKLIEMQG--DG------PYILVGWS-LGGVLAYACAIGLKRL-------GKDVRFVGLIDA--------------------------------------------------------------------------VRAGEEIPQTKEEIRKRWDRYAKFAEKTFNVTVPAIPYEHLE---ELDDEGQVRFVLEAVSQ------------------------------SGVEIPAGIIEHQR-------------------------TSYLDNRAIDTAE--------------------IHPYDGHVTLYMADRYHD---------------------------------
>SACE 4138|gb|NC 009142.1| Actinobacteria - Saccharopolyspora erythraea NRRL 2338 T1PKS Thioesterase
--ELVCLPSVLATSGAHQYARFATALRG----RRSVCSLTLPGFA----AGE----PLPANLDALVDAAAHAVRARIGDA--------PAALVGYS-SGGLLAHPVAAALER-------DGARPAAIVLIDTFPPG-----S-------------GLTPAVLDGMFAR--------------------------------------LAGLDALNDARLTAMGGYLRL--LSDWKP--------------------AEIGAP--------------------------------------------------------------------------VLLGHAAE------------PPQDAPD-----------RQWHQPHHGAVLPGDHFTVLEDHAT----STAEIVHEWL---------
>SACE 0724|gb|NC 009142.1| Actinobacteria - Saccharopolyspora erythraea NRRL 2338 T1PKS Thioesterase
---VICCAGTAAISGPHEFTRLAGALRG----IAPVRAVPQPGYE----EGE----PLPSSMAAVAAVQADAVIRTQGDK--------PFVVAGHS-AGALMAYALATELLDR-------GHPPRGVVLIDVYPP---GHQD-------------AMNAWLEEL-------------------------TATLFDRET--------VRMDD----TRLTALGAYDRL--TGQWR--------------------PRETGLP--------------------------------------------------------------------------TLLVSAGEPMGPWP---DDS--------------WKPTWPFEHD--TVAVPGDHFTMVQ--EH--ADAIARHIDAWL---------
>Strop 0688|gb|NC 009380.1| Actinobacteria - Salinispora tropica CNB-440 NRPS Thioesterase
---HLHLVHGAGG-SPQDYQHLLAELPQH----WRVTASRDSGQLP--------------TVPALAHRYQADLDTAGLVP---------DLLGGWS-FGGQVAYQMVADQTER----------RPALVLLDSAPPVGYELSADN-----------------------------------------VRQRFDTFTENVYRAFNLESDAPRSRVTGGAGPAGFHERLAVGALAACLAAIQQP-------------VPAALLAHQWNSYER-------------------------------------------------------------------HLRASAEYVHDGPVDAPALVIG-----ADLLDAQLAQWAARVGALRSHRIDADHFGVLTS-------AAAAQVAAAVI--------
>Strop 2654|gb|NC 009380.1| Actinobacteria - Salinispora tropica CNB-440 NRPS-T1PKS Thioesterase
---PLFLIHPSGG-DVLCYGELVGLLTDD----RPVVGLTDP-ALTGGVE--------PADIPALAGHYLDAVRQYQPHG--------PYLLGGWS-MGGTLAHEMACLLERR------GES-TALLFMIDSNTPDRIRTLH-------------GQGAPQNI---------------AAVRYLHSLAAFLDLDLGFGPTEEA---------ELHGRTGDEIRRAVTQRLRDVGLLSQ-------------RDTADLRLRVFERH-------------LRMLGEH--------------QAGHLS-------------------------DPATRLLLVRAALPSPRNSGVGMGVDDAPD----LPGLGWDGHVHGPIREV---AVEGHHYSLLT------GGAVTTIAKHLNETL-----
>SGR 3264|gb|NC 010572.1| Actinobacteria - Streptomyces griseus subsp. griseus NBRC 13350 NRPS Thioesterase
---PLFCLHPVGG-VSWMYSGLMRHIDGD----RPLYGIQARGLARQ---E-----RLPASIAEMAEDYTERIREVQPSG--------PYHLLGWS-MGSLLAHAVAVRLQQQ-------GQEVALLANLDQPPVSAEELDG--------------EYVAADDQK--------------VYAALLDFVGRD--PGMFGDG--------------PLERDRVIEVLREEGSALATFDD---------------EHILRIGGVNNNN-------------WSLTIGY--------------EPEVFDGD--------------------------VLLFVATRDE--DGPRDKTG-----------RSVARLQPFVTGKVEV--EEIDCEH-RRLLQ------AGPVAEVGRALQQRL-----
>SGR 6183|gb|NC 010572.1| Actinobacteria - Streptomyces griseus subsp. griseus NBRC 13350 T1PKS Thioesterase
--VLICLSTITALSSVYQYARFGTALNG----RREAWFVPVPGFT----AED----PVPADVDAVVELHADLALRCAEGR--------PFALVGHS-AGGWLAHAVTSRLED-------RGVPPVGTVLIDTYLPG-SSAFT-------------QVQDALTDLMFD--H------------------------------------ESTVGRLDSVRLTAMGAYLRL--FDDWSP--------------------EPVHTP--------------------------------------------------------------------------TLFVRAGEPV-------TD---TV--RGD------GWRLSWPLPNTTREVPGDHFSLMQSGAA----TTAEAVDAWL---------
>SGR 6739|gb|NC 010572.1| Actinobacteria - Streptomyces griseus subsp. griseus NBRC 13350 NRPS Thioesterase
---PVHCVHPAGG-LSWCYAGLIRNLPAD----VPIYGLQAQGVGEATADG-----PLPTTLEELAAHYASRIREVQPEG--------PYRLLGWS-TGGIIAHAIAAVLQEG-------GQEVELLAILDAYPAEGFRELP-----------------VPDRAE--------------ALESLLTMGGYG--PESLGDK--------------ELNTANVVEVLRREGSPLAALSA---------------AKIEALGEVYLNT-------------NDLVRAY--------------DHRVFQGD--------------------------VLFFRATVD---TIDETLT--------------PETWTPYVSGRIDN--TDVACSH-KDMTL------PEPIAHIARVVADRL-----
>SGR 6777|gb|NC 010572.1| Actinobacteria - Streptomyces griseus subsp. griseus NBRC 13350 TRANSATPKS-NRPS-T1PKS Thioesterase
---PVFWIHGALA-GVESYRTIAERVDRP------FYGIQARGLL--------TEDAPIEGVTAMAEHYTEAIRSVQPEG--------PYDVGGFC-LGGIIAYEVTRLLQAR-------GQEVASLTMVDSPDETGLAKSN--------ANGFQSARSAALQVVNSL---------------------LWPAGEKDPAVLRARLVHRDEVAEEDLDEDAFVLRLAELAAGRGLAMRPAQ-------------IARFTRRNMAIQLAYRLGEHTIRP---------------------------------------LPRPRAVVCTYFRNRRGLFLGEAEPYFQVAGETFS---------LDHVNYQQDWGREMPDLRL--VEIEA-ANHMTILNDAEP--LAAIEETCLA----------
>SGR 6785|gb|NC 010572.1| Actinobacteria - Streptomyces griseus subsp. griseus NBRC 13350 TRANSATPKS-NRPS-T1PKS Thioesterase
--DLVCLPSLIAPTGAHQYVNFAGALRG----RRQVWAASLPGYR----AGE----PLPADLEAAAERLAATLLRRFGGG--------GFALAGYS-SGGWLAHEVVRRLEA-------AGAPPAGLVLLDTPRTTGAAMVG-------------GMT-VITRRLLDR---------------------------------------FPRLPLADEQVTAMARYGEL--LDGWRP--------------------LPVTTP--------------------------------------------------------------------------TLLAAAAQE----------GPLRELLGDD-------ARSGWPLEHRRADLTGDHFSLLEEDAA----ETAFTVDRWL---------
>SGR 653|gb|NC 010572.1| Actinobacteria - Streptomyces griseus subsp. griseus NBRC 13350 NRPS Thioesterase
---PLFCVHPAGG-LAWAYAGLLPHLEND----RPLYGLQTPNLDGTRP--------FPDSIEAMAAVYVAELRAVQPHG--------PYHLFGWS-FGGNVVQEVAVQLQEA-------GEEVALLTILDAFPLAPLDDLD-------------R---------------------------ASRDTVFRALLSNMGVGQEA------LAGDGPVEAGDVRDQFRANGSPLGALEPA---------------TIDAMVDNFAGQ-------------ARLMRRY--------------TPRVFHGP--------------------------ALFFTAAEGRP---ADTFDLSL--------------WNPYITGPIENH--DVACAH-AQMMQ------PAAREQIGTTVTAVL-----
>SGR 814|gb|NC 010572.1| Actinobacteria - Streptomyces griseus subsp. griseus NBRC 13350 T1PKS-NRPS Thioesterase
---ALFCFPPAGG-HGLVYRGLAAQLPDY-S-VTGFNYLPGDDK---------------------VSRYADLIEADRPDG--------PYLLLGYS-LGGNLAFETAKELERR-------GRDVAHVVILD------------------------SRRILAAYEPD-----------------------ASGIAAFESELADHVRKHTGSEAVAHETLAHAAEYLAFCGRTPNTG-------------------TVAATVS----------------------------------------------------------------------VITDEEKTALYAAGEHGTWHGSSTG------------ATAVLRGSGVH--ADMLDAKHLPRNA--------ELVRSVL------------
>gll1941|gb|NC 005125.1| Cyanobacteria - Gloeobacter violaceus PCC 7421 TRANSATPKS-T1PKS Thioesterase
---RLFCFHHLGG-GASVFRQWADALPAD----VEVCPVQFPGREERIAEM------PLTSFCAAIELLVQVLEPHLDR---------PFALYGHS-MGSLVGFELAHRLGEH------HGLQPEHLFVGGLWAPHLHAAKM-----------------------------------------AHQQASLSTLLEIPAALRTDAQFMAQLWPAVEADNHLCRSYSYQERAR-------------------------------------------------------------------------------------------------LLGCPLTVFGGLQDRVAGREELTA-----------------WNRHTNGIFR--LQMFPGRHLFLNDSRDALLKVLARSL--------------
>gll1954|gb|NC 005125.1| Cyanobacteria - Gloeobacter violaceus PCC 7421 TRANSATPKS-T1PKS Thioesterase
---RLFCFHYLGG-GASTFRQWPEGLPAD----VEVCAIQLPGREERLEEP------PVADFFALIATLAEQIGPELDR---------PFAFYGHS-LGALVCFELARRLRRQ------SGALPVHLFAAAYYAPHLRTPSQGTGVSGWTD--------------------------------ARLREEIPRVISAPQSLMDNAEFMQVLLPRVRADACLLSTHLYTEEP--------------------------------------------------------------------------------------------------PLDCPITAFGGLQDTVVDRESLAA-----------------WSAHTNGAFQ--LEMFAGNHIFLESAREAVLGAVAAGL--------------
>MAE 38550|gb|NC 010296.1| Cyanobacteria - Microcystis aeruginosa NIES-843 NRPS-T1PKS Thioesterase
---AVFLFPPALG-FAAAYANLAEYLTNY-A-IYTFRYISDELM---------------------LKKYAELIEDLAQNQ--------DIKLMGHS-AGGFLAMLMAQQLESR-------GRVVSDVILLD---TYRGGREA-------------KKADMSEIQEG------------------------VDAFLLNPKRQELRGYFLENQKLRNRTYNQVWEYFNFLWNSDLKN--------------------VQIQGT-------------------------------------------------------------------------IHLIRAEGNYEAQDDWTQATKGE------------RINHYATGIH--REMIDPPYLPKNALI-------------------------
>MAE 60000|gb|NC 010296.1| Cyanobacteria - Microcystis aeruginosa NIES-843 NRPS Thioesterase
---PFFCVPGAGG-RPFYFYHLGRCLGKD----QPFYSFENDLYQQFG-EI--------TRIEDIASIYLQAMQDLQP--QG------PYFLGGHS-YGGNVAFEMAQQLVNQ-------GQQVALLAIIDSSAPTYKD-KQ-------------ILLDYINWDH---------------------ARWLAEVSKGIEVYLDKTIDISYETLQLLTV-EEQLKYALNFFKLANMLPPNAETRQLEKIVQAYKTSCLCLIDYLPKQIYP------------------------------GKITIIRAREELA----------------------DDPNKDLIAGDCEDSSL------------------GWSEFSTEPVEIHFVLGNHVSIMVEPH---------VQILAEELKVCL-----
>Npun R6587|gb|NC 010628.1| Cyanobacteria - Nostoc punctiforme PCC 73102 NRPS-T1PKS Thioesterase
---PFFCVHGLGG-EVLRFRQLAVHLGSD----QPFYGLQPQGLDGKQLPY--------TRIEDMAAHYIQQIQTIQP--GE------PYLIGGYS-SGGIIAYEMARQLVMQ-------GKEVALLVLFDTYGSK------------------------NTESL---------------------SLQKPASHDWKSLLAIASNYLIEQVKGNAERFKYQIKEIVWRFVFHFHLILSRPLPYSNRKYMVEHATIQALRKYAL-QVYS------------------------------GRATVFRTEDGLVV--------------------GQ---------READSKM------------------GWGKLALGGVDIYDISGIHNSIFKEPH---------VQSVSEKMKAC------
>Npun F2184|gb|NC 010628.1| Cyanobacteria - Nostoc punctiforme PCC 73102 T1PKS-NRPS Thioesterase
---PLFCLPGAAG-YPFYLYDLARCLGSD----QPFYSFQAIAPGEGGELI--------TQVEDVAARYIQELFVVQP--QG------PYFLAGHS-FGGKLAFEMAQQLLRK-------GYKVALVAILDTTAPFHQK-NP-------------SAFD---LDN---------------------TKWLAELADTIEVVYGKKMDCSVDTLQSMVW-EDQLKYVLERLKNADILPPDDEITQLNNMVQLLKAN--AVVNYVPQEIYP------------------------------TKITLLRAKENVVK--------------------VNESNSEVLSDILQDSHW------------------GWSKFSAEPVNVHFVPGNHVTMMNLPH---------VQTLAEQLKACI-----
>Npun F2463|gb|NC 010628.1| Cyanobacteria - Nostoc punctiforme PCC 73102 NRPS Thioesterase
---SLFFLPGANG-HGFYFRDLAINLGTER----PVYGLETPGRDGLS--------ALPESVAAHANQLIDVLRQQQAQG--------PYILAGYS-SGCAVAFEIASQLEQQ-------GETVSLVAILDAGLVSKPEYFTDR----------------------------------------AELDWIWQLIRRIEALKGVSLGLQYNDLATKPNDQAKWELAAEYLYRNNVLPEHSTLSLLKTNMKVMKGLTLNYAHYQPTHPIS---------------------------------------------------------------APIVLFRAQEIHEIVLQEIQAFSDYD---------LLDWGWQTYTQKPVKVISVPGNHGGMLYEP-------NVKLLATQLQ--------
>Npun R3023|gb|NC 010628.1| Cyanobacteria - Nostoc punctiforme PCC 73102 NRPS-T1PKS Thioesterase
---PFFCIPGAGG-NSIYLYNLAHHLGRD----QPFYALQALGLDGESTPH--------TSVEEMATHYIQAIQSVQT--EG------PYFLGGHS-LGGMVAFEMACQLQKL-------GHKVALLALLDCGAPENIDNID-------------TVQQNVEIDD---------------------ADWLNEIGFLFEQFYGKSLEISYEILQSLTP-DTQLQYFQERLQMANLLPAGIGIKQLRGLMQVYKTN--MQIVYTTQNIYE------------------------------NKITCFISSETEN-------------------------VSSENSESLEDTRL------------------DWDNFSTKPLDIYVVPGNHATMLNEPN---------VQVLAEKLRTCI-----
>Npun F3173|gb|NC 010628.1| Cyanobacteria - Nostoc punctiforme PCC 73102 T1PKS-NRPS Thioesterase
---PFFCVHPAGG-NVLCYMDLSRRLGAD----QPFYGLQAVGMDGEQPPF--------TTIEDMATDYIAAIRTVQP--QG------PYSIGGWS-FGGIAALEIAQQLRQQ-------GQEVNMLVLIDCPAPLSG----------------------EDLDE---------------------ATLAAWFIQDLEGRFDLDAT-RLQQLQQLDT-AQQLNYILEQARLLHLVPPDAGVEQVNYLFEVFKCNMRAIESYTP-RLYE------------------------------GLATLLRAENQPL-------------------------------ENPTNPAL------------------DWHKLLTN-LEVRWIPGNHYTMVREPD---------VQTLATQLRACL-----
>Npun R3425|gb|NC 010628.1| Cyanobacteria - Nostoc punctiforme PCC 73102 T1PKS-NRPS Thioesterase
---PLFFVHPVGG-NILCYYELSLHLDSD----QPFYGLQALGLNGESQPY--------TRIEDMAAKYIEALREIQP--NG------PYFLGGWS-MGGIVAFEMATQLLRN-------GDRVAMLAMLDSPAPVNSK----------------EIAEIDDYND---------------------VKILVDFATDMAQSAGKNLSGSVEQLQALMTLDEQLNYFLEQARIVNLLPLDFELEQLRCLLKVFKSNVLALQSYTP-QVYP------------------------------NKILYFQASDEVS-------------------------------NEFSNPTY------------------IWGGLSGKPIEIITIPSNHYTIITKPH---------IQIILEYLN--------
>BSU03510|gb|NC 000964.3| Firmicutes - Bacillus subtilis subsp. subtilis str. 168 NRPS Thioesterase
---IIFAFPPVLG-YGLMYQNLSSRLPSY-K-LCAFDFIEEEDR---------------------LDRYADLIQKLQPEG--------PLTLFGYS-AGCSLAFEAAKKLEEQ-------GRIVQRIIMVD---SYKKQG-V-------------SDLDGRTVESD-----------------------VEALMNVNRDN-----EALNSEAVKHGLKQKTHAFYSYYVNLISTG-------------------QVKADID------------------------------------------------------------------------LLTSGADFDMPEWLASWEEATTG------------VYRVKRGFGTH--AEMLQGETLDRNA--------EILLEFLN-----------
>BSU17220|gb|NC 000964.3| Firmicutes - Bacillus subtilis subsp. subtilis str. 168 T2PKS-TRANSATPKS-NRPS Thioesterase
---PVFWFHGGVG-GVEIYQQFAQKSQRP------FYGIQARGFM--------TDSAPLHGIEQMASYYIEIIRSIQPEG--------PYDVGGYS-LGGMIAYEVTRQLQSQ-------GLAVKSMVMIDSPYRSETKEN------------EASMKTSMLQTINTM----------------------LASIAK-REKFTDVLISREEVDIS-LEDEEFLSELIDLAKERGLNKPDKQ-------------IRAQAQQMMKTQRAYDLESYTVKP---------------------------------------LPDPETVKCYYFRNKSRSFFGDLDTYFTLSNEKEP---------FDQAAYWEEWERQIPHFHL--VDVDS-SNHFMILTEPKA--STALLEFCEKLY--------
>BSU18300|gb|NC 000964.3| Firmicutes - Bacillus subtilis subsp. subtilis str. 168 NRPS Thioesterase
---NLFCFPPISG-FGIYFKDLALLLNEKAA-VYGFHFIEQDTR---------------------IEQYVNCMTDIQPEG--------PYVLLGYS-AGGNLAFEVAQAMERK-------GLEVSDFIIVD---AYL-KEQP-------------LPIDTGNDE--------------------------SAAYLPEAVR--------------EKVMKKKRNYQEYWAQLLNEGHIKAS--------------IHFIEAG-------------------------------------------------------------------------IHPETSGHTGLTKWEG--ACGN-------------YSEYTGFGAH--KDMLEGTYAEKNA--DI--ILDILE---------------
>BSU31960|gb|NC 000964.3| Firmicutes - Bacillus subtilis subsp. subtilis str. 168 NRPS Thioesterase
---PLFCVHPAGG-LSWCYAGLMTNIGTD----YPIYGLQARGIGQREE--------LPKTLDDMAADYIKQIRTVQPKG--------PYHLLGWS-LGGNVVQAMATQLQNQ-------GEEVSLLVMLDAYPNHFLPIKE-----------------APDDEE--------------ALIALLALGGYD--PDSLGEK--------------PLDFEAAIEILRRDGSALASLDE---------------TVILNLKNTYVNS-------------VGILGSY--------------KPKTFRGN--------------------------VLFFRSTIIP--EWFDPIE--------------PDSWKPYINGQIEQ--IDIDCRH-KDLCQ------PEPLAQIGKVL---------
>BA 2372|gb|NC 003997.3| Firmicutes - Bacillus anthracis str. Ames NRPS Thioesterase
---PLFCVHPAGG-LSWCYAGLMKSLGTD----YPIYGVQARGIAKNEE--------LPKSLEEMAADYLKHIREVQPHG--------PYRLLGWS-LGGNVVHAMAAQLQNE-------GEEVELLVMLDSYPGHFLPNTE-----------------APTEEE--------------ALIALLALGGYD--PDNMDGK--------------PLTMESAVEILRKDGSALASLEE---------------ETILNLKETYVNS-------------VGLLGKY--------------IPKVYNGD--------------------------ILFFRSTVIP--DWFDPIS--------------PNTWLNYLDGQIVQ--YDIDCRH-KDLCQ------PGPLTEIGQ-----------
>CKL 1511|gb|NC 009706.1| Firmicutes - Clostridium kluyveri DSM 555 NRPS-T1PKS Thioesterase
-----ILIHGAFG-NLENFNSLATELAQQNQGDILVVGVSDVDKYLDMKP--------IDIVPKLSDIYYEKIMKHGFKN---------VQIIGYS-FSGVVAIEIARSLLES-------GIEIDNLSIIEGGSISEINYDELILEFVFLKAFKISVSDLKLQQIS-------------------ILDDIFKDSYSYENVLTVTSVLSKLRLESDREIIKNLNHKIQEERFDTYFRVLEEKKEKILSRRSFSELYKIFKKSFEAQMYIP-----------------------------------------------------------------DMYFGDIDYYIAQDNTGAYKHFN-------LLLDNWRDNVIGNINKYYIPGDHYSAVQDTEN--------AKILAELLKI-------
>METDI5676|gb|NC 012988.1| Proteobacteria (Alpha) - Methylobacterium extorquens DM4 NRPS Thioesterase
------AIHHAAA-DQELYRPLSEALGAD----HPFATLQLESRVPP----------HEETLERLAGAYREAIDAAQPQG--------PLRLVGFC-RSGVLAFEIARQFAQG-------GRDVALVVLIDCWEPG--------------------------------------------------------------------------------YIRRLKPLARMRVMAAYRR--------------------------------------------------------------------------------------------------------------------------------------------GRLAALIRHVRRDGIGYLGS---------RAHL-------------
>Ndas 0496|gb|NC 014210.1| Actinobacteria - Nocardiopsis dassonvillei subsp. dassonvillei DSM 43111 T1PKS Thioesterase
--RMVCLPSLVMVSGVQEYARFGAALQG----LREVVVLPQPGFT----PGD----PLPRTLEAALAVQARAVREVVGDE--------PYVLVSRS-SGGWVTHSVATLMEA-------GGHAPGAVVLMDTPMPEE----P-------------TAFPIIQAGVLERE--------------------------------------TRFGLMDGTRVTAMGRYIGL--CADWEP--------------------APTAVP--------------------------------------------------------------------------TLAVRPGQQM-------LDASGTPIGGRD------WRFD-WPLPHEAVDVDGDHITMLEEHGP----DTALTVHRWL---------
>Ndas 1030|gb|NC 014210.1| Actinobacteria - Nocardiopsis dassonvillei subsp. dassonvillei DSM 43111 NRPS Thioesterase
------LVHAGTG-TLIPYRSLITEIRRRSRGQATLVGLELPDVPAFLDADP------AAVIKRWAADYANALLERGGD---------RFHVVGYC-LGGLVATEVARTLTDA-------GAEVASLTAISTHRPPFRLDDE---------------------------------------------LISEYAFAVMMGIDPVSVGFPADENRVSAASDQLLAATPG-LLPDGAIGRLTGE--YADVA---ERFRELAKVPRQTRIER-------------------------------MCAAVPPSAGTYTP-----------------EALNEMFAIFRQSVFAISRYEPEPYAGDVTFLRHGG-AYPFPGNKESVTTYWERLVLGELDIVDVPGDHFSLLSVPYAPGVLKRLEDIT--
>Ndas 1741|gb|NC 014210.1| Actinobacteria - Nocardiopsis dassonvillei subsp. dassonvillei DSM 43111 T3PKS-NRPS Thioesterase
---PLFLFPPVNG-LGWCYSSLLGHLPSD----RPVHILHDPRLETDEVLP--------LTVAELASHHAERIRKLSSDR--------RRVLLGWS-FGGTVAQQAARELTEA-------GEAPDRLILLDAHVGGADRTDP------------------------------------------------DPSPEDVCSAAFDGLVVPVGPADDRPRTPDVRAALEARGSALSSLDGP---------------VLERLFQIARHN--------------------------------------------------------------------VAAMAAHRSAGTDVPTAFVEAR---------------QEGDEPPATHGWADLLGSDVRVRATAVDHFALLSPRSAGSVGPL-------
>Ndas 1761|gb|NC 014210.1| Actinobacteria - Nocardiopsis dassonvillei subsp. dassonvillei DSM 43111 T3PKS-NRPS Thioesterase
----RVLVHDGTG-TLNPYRSLSPLLAADGP----LLGIAL-DGGRIDDDPP------EGHIDRLAADYAESLLREGG----------RFHVVGYC-MGGLLATEVARNLTEA-------GADVASLSIISSYRLPHEVRDE---------------------------------------------LVLEFVFARVLGADTAKLGYP-DDAVLARAFDAVLARTPG-RVPEGALARLPEEEGLADAA---RAFRALADKGAAARFQT-------------------------------MAEAVGPGLAG--------------------EDVAALYPVYRHSMAAVAAHRPQPYAGDAVFLREASDTRFLPWLRQDMTRFWRDLCLGELTVQDVPGDHFSCLREPHVDTTARLLLA----
>RSc1811|gb|NC 003295.1| Proteobacteria (Beta) - Ralstonia solanacearum GMI1000 T1PKS-NRPS Thioesterase
---TLVCVHASDG-HAAAYRPLAAVLAGT----VQCVALQSPGLEAGQAP--------LRSVEAQAACYLAALRAGREAG---AQ--APWHVLGWS-MGAYVAVEMARQLAQA-------GECVAQLLLVDPAPQEAMRAAAR-----------------------------------------SEYDLLLSLAPEAVRRELAEQVGSADAFASLPPARRLAHWRAGLRLAAPSPADDDAALER-----MVAVLLANVTAMVDYR--------------------------------------------------------------------LPILDLPTVALYQASEHPAG----------------WGDVIAPWRDVFPRGIQAETLAGTHWS-----VVGAEVLGPVLAQ-------
>RS05859|gb|NC 003296.1| Proteobacteria (Beta) - Ralstonia solanacearum GMI1000 T1PKS-NRPS Thioesterase
---PLFLVHEITG-LDGYFTQLGAWIDAD----IPVYGLPA--VGWGEP--------QLRTIEGLAKRLKAAMRAVQPHG--------PYRLAGWS-FGGVLAYEIAIQLIGE-------DEEVEFLGLLDTRQPALVSGGK-------------PKWAAENR---------------PHHAQLLELCLAYWQQRS-PGGPESAKLAGLAG---VEDFSALLERCRAQALLAPDLADVTE-----------PDLWHVLDRIVAH---------------GDAQAN-------------YTVFPMPLK--------------------------LHLFVAAHEQRDDEPPPHKRWLG-------------WNAILPDTQLQR-IVVPGTHQSMVLE--------HAQALGEALSAAL-----
>RS05859|gb|NC 003296.1| Proteobacteria (Beta) - Ralstonia solanacearum GMI1000 T1PKS-NRPS Thioesterase(2)
---SIVCIPGAGD-GVVRFMHLAEALGGA----RPLYGMQPRGVDGWRVPH--------GTVEAAAAAYVRALDAGQV--AR------GIHLIGHS-FGGWVALEMALQLQAA-------GRAVASLTLLDCEAPGSEAG-------------------------------------------------------------------------------------------------------------------WLGRTYTATQVLA------------------------------KFVEAVELA-------------------------------------------------------------LGRSLGIDPARLH----------------------------------------
>RS03122|gb|NC 003296.1| Proteobacteria (Beta) - Ralstonia solanacearum GMI1000 NRPS Thioesterase
---PLFCIHPGVG-EVLVFVNLANYFVND----RPFYALRARGFNPGE--------THFQSFDELVRTYVTAIRKRQPQG--------PYAIVGYS-YGGPVALPVAQMLEAQ-------GEQVAFLGSIDAPPVIKHPRGK-----------------------------------------------VDAVESALMLAFFLSLIDRSQIDALPERLRAIQPHKDPCDYLFEIAPKERLKELDLDLPRFKAWAALALSLSDIGQAYTP-------------------------------------------------------------SGSVDSITVFYADPLWGSKQAYLKH------------ELKRWDQLTRSPNRYIEVAGEHHTMLDP-------RHVASFQAVLR--------
>RS03120|gb|NC 003296.1| Proteobacteria (Beta) - Ralstonia solanacearum GMI1000 NRPS Thioesterase
---AVFAIPGVGG-LAAAFAPLGTELRRHG---IELVAFDSPGWHADRTLP------IDARLLAYVQHVVDAIRRRTPHG--------PYQLIGHS-FGARVAFDVALALEEAG--------GTVALTMLDALPGNDLVDMS----------------------------------------------RWRVGQTPRELAGWLLGAMQNGDVPAEPGEDAVASLARLQIYGDLDVHDALALVD---------DQMLASRRYRPAR---------------------------------------------------------------------RLRATRVQMVYAEHGLIG-------------------AHAHDAIVDSLRAWADTVAVARLDADHFSMLKAAPALAGHVMAH------
>MXAN 4296|gb|NC 008095.1| Proteobacteria (Delta) - Myxococcus xanthus DK 1622 T1PKS-NRPS Thioesterase
---PLFLAPPSAG-SPAVYVTLARHLDAE----QPVFGFQMPGVMDDQLPP--------ETIEDTAALYVAALRQVQP--RG------PYRIAGWS-YGGLVVCEMARQLEAL-------GEQVALLGLIDG----------------------------------------------------------------------------------------AALDR------------------LSAHDGTPQEIPAG------------------------------------------------SQLIKVLG------------------------------EAQMPRD------------------YASLRLIGEWMGISLP---------------------EAWADLLRRDT-----
>MXAN 1607|gb|NC 008095.1| Proteobacteria (Delta) - Myxococcus xanthus DK 1622 NRPS Thioesterase
---PFFVFHPADG-ELHYYRNLTPLLEPG----LRCYGVQAPETQSKHG---------HATFDARIAAYVRDIQAVQPHG--------PYRFAGYS-FGGYPALGVAAALEAQ-------GETVELLALVDALPAVEGPQGS--------------------------------------------AEDPVRSMAEEFGVLDAALEAELAPLDDAARWERVTALGRELGMLAPHSRAADLR-----------RIWHVLGEVLVPQVVG-----------------------------------------------------------------WKVPSVRARVQLFTSAPSRALHG----------DTLGWERHLTREQLDVVPLPSSHFGTLQQP-------CVQELANHLLEVL-----
>MXAN 2798|gb|NC 008095.1| Proteobacteria (Delta) - Myxococcus xanthus DK 1622 T1PKS Thioesterase
---PFFCVHGAGG-NVLNFRELAQTLGKE----QPFYGLQARGVDGKLPPA--------DSIEEMASIYLESIRQVQP--HG------PYLLGGYS-GGGVVAYEIAQRLHAL-------GEPVALVAFLDTFHP-------------------------STQ-----------------------ERRQSLHERLRELRREGAASYVSRKLR--TKVERDGTRLLSQLKLRWYEQRGEALPIELRNLQLTERFQALASRYVP-SPYA------------------------------GPVTLFR-------------------------------AQEIHAIYAHMGTS------------------LGWEPLVPALNIREVPGDHDSLVREPN---------VHVLGRLLRE-------
>MXAN 3618|gb|NC 008095.1| Proteobacteria (Delta) - Myxococcus xanthus DK 1622 NRPS-T1PKS Thioesterase
---PFFCVHPVGG-TVFCYTELARRLGPD----QPFYGLQAQGLEGTLPPL--------ESIDSMAASYVDAIRTLQP--QG------PYRLGGWS-LGAVIAFEMARLLHQR-------GETVEVLALIEPSSTSLAQ----------------GVTTNDDSAA---------------------ATMFALDLALT----AGIAS-AMTVEGAVSDPQALVERVLQEDREAGVFVPDAGMEHFHALLRVFTANVRALQQHTLGTFP-------------------------------GSLTVLRGSDTE---------------------------LEPSEAEDRGWS----------------------RHAT-QLAVHVVQGDHYTVLRLPG---------ADALARVLTELL-----
>MXAN 3636|gb|NC 008095.1| Proteobacteria (Delta) - Myxococcus xanthus DK 1622 NRPS-T1PKS Thioesterase
---PVFCVHPVSG-NVLPYLELSRRLGPD----QPFYAFQAPGLEGERAPL--------GTVEAMASTYVEAMRGVQA--SG------PYRLAGWS-LGGVVAFEMARQLEQQ-------GEQVEQLTLIDAYAFDQR-----------------PVEPVGAEWI---------------------AARFVEFTGQL----LGLPLSELIADAHPADEASLLDRLLELGRRTGVLAQGVGSEQLHALYRVYESNLRALWDYQPGRYG-------------------------------GRVTLLRASET----------------------------RVPTG-TDGGWG----------------------ALAAGGVEVHELSGDHHSILRAPA---------VDVIAETMA--------
>MXAN 3779|gb|NC 008095.1| Proteobacteria (Delta) - Myxococcus xanthus DK 1622 T1PKS-NRPS Thioesterase
---PFFCVHPVGG-NVLAYAELARLLGPE----RPFYGLQAQGLDGSTPPL--------GTVEEMAAAYVEAIRTVQP--AG------PYLLGGWS-VGGVIAYEMARQLRER-------GDTVALLALIDAYTPAVLN----------------AAEPEPD--A---------------------AQVVSAFASDL----LGIGFTDLATPDASLSPEAQVEALWEAGQRAGALPPGMEPAHLRALLQVFEANLWAARRYQPPALNP------------------------------GRVLRLQATEG----------------------------AEGLP-EDGGWK----------------------ALVGTGLEQHAVSGDHYSVLRAPG---------VRELADRLRSAL-----
>MXAN 4000|gb|NC 008095.1| Proteobacteria (Delta) - Myxococcus xanthus DK 1622 NRPS-T1PKS Thioesterase
---PVFFVHAVGG-AVGPYRALARRMGRE----RPLYGFQAAGLDGREPPL--------EQVEALARRYVEAMRERQP--EG------PYVLGGWS-LGGVVAFEMARELERL-------GQSVALLVLLDSFAPDENA----------------PTREPDAALL---------------------LAGMAMDLART----AGVESTLRPEMLSGLTEEEQFTALVEHARQAGWLPPEVEASTLRAWRDVTRANLRALAAYRPGPVR-------------------------------CPVLLLRAKDAQ---------------------------RSRAVEPSHGWA----------------------RWGLSGLTVEDVPGDHYSVLREPQ---------VETLARRLVEH------
>MXAN 4079|gb|NC 008095.1| Proteobacteria (Delta) - Myxococcus xanthus DK 1622 T1PKS-NRPS Thioesterase
----VLYLVPGGGSTPFYLLSLARHLEG-----VAVFGLQPQGLDGDVPP--------HETVEAIATWYADAILAMQPEG--------PYSVGGHS-MGGHIAYELAQELKAR-------GREVGVVAMLDTLAPFPDVTRPQGE--------------------------------------GWDTAQWMLHLAGIMEAFFNVKIDLALPEVRAMGEAERLQFFVARLQAAAVLPEGAQPVHVQGILNVARAHDALNYRPRRGQPVP-----------------------------------------------------------------LAVFRAEDRSGPSTAALDALVQDG-----------TLGWSQLTQQACSAYPVPGTHLSLLRDP-------HAAVLAQHLLALI-----
>sce0345|gb|NC 010162.1| Proteobacteria (Delta) - Sorangium cellulosum So ce 56 T1PKS-NRPS Thioesterase
---PLFLVQPIGG-TIFIYRELARQMGAE----LSIYGIRASGMEPGEPVFT--------EIPAMAARYVQELRAVQP--EG------PYLLGGHS-AGGVIAYEMAQQLLAE-------GKK-AQLLLLDTGSLA----------------------------------------------------------------------AVRGASIES-ADDVLRQLIGLKDAAPKAYQGFVAALQEDAPFRAIVLSTWRAMTLYEPRPTE------------------------------ASVLFVSAREQLDA-------------------------SGSDDVDYWRDLT--------------------RGRFVTHQVPGNHFTMMEPPQVASV---------ARVVRAHI---------
>sce6823|gb|NC 010162.1| Proteobacteria (Delta) - Sorangium cellulosum So ce 56 T1PKS-NRPS Thioesterase
---PLFLIPPLGG-TVHLYRPLVQRLGGE----QPVHGIQPTGADPSEPGFM-----SAMSVPAIAARYVEEILSVRP--EG------PYLLGGHS-AGGVVAYEMAQQLLAQ-------GRKVALLLLLDTG-------------------------------------------------------------------------SVQGASDRSPASALAHEMAKIQAIASQRYRGFVAAMEDDARLRAEVTSTWQALASYAPQPTD------------------------------ASVLFLRAREQISP-------------------------EDAVAVHAWMDLA--------------------RGEFALQVVPGNHFTMLDPPHVAHV---------ACAIQQRI---------
>sce8255|gb|NC 010162.1| Proteobacteria (Delta) - Sorangium cellulosum So ce 56 NRPS-T1PKS Thioesterase
---PLFCVDPTGL-HVMVYRGLAAAMSEE----QPVLGLDLGPSLAGEAT--------ALSLPRIVERLSREIRERQPRG--------PYRLLGWS-VGGVLALAVARALEQQ-------GERVAFLGMLDAQPRTQLYAAG-----------EPDVVEELAAYID---------------------QGRSAELLALAPAERDALRERLAGLSDGERVAEAVRWAQARGFASSDIPPAAYHHR------YALLRGAALLAKDLPP---------------------------------------------------------------------RSVAAPIHAWWSTETIELHGGP------------PMDWQQFTAGAARSAILPGDHLAAVQG------PDVHVHVRAAL---------
>sce2387|gb|NC 010162.1| Proteobacteria (Delta) - Sorangium cellulosum So ce 56 NRPS Thioesterase
---PFFCVHPVGG-NVLCYRELARQLGAE----QPFYGLQSPGLDGAQAPP--------ASVEEMAALYVSAVRSVQP--SG------PYLLGGWS-MGGVVAFEMARQLERS-------EQRVEVLALIDAQVEGVR-----------------PGAP-------------------------------------------------------PADADHLLHTLFDHDLARVAGGSPPPEEALPALRRVFMSNMKALYGYDPGPYG-------------------------------GTITVFQAIDG----------------------------RASSPDAVDAWR----------------------RLAPSGVEVERVRGDHYSILQAPG---------VEPVARKLRALI-----
>sce3193|gb|NC 010162.1| Proteobacteria (Delta) - Sorangium cellulosum So ce 56 T2PKS-TRANSATPKS Thioesterase
---PVFWFHGSLG-TVQTYLGLSRGLGPT----LPFYAVQSRGVKANEEP--------IDDLSEMAKYYAEILLAARGGAG------AAFQLGGYS-EGGLIAYEVTRHLQRM-------GHDVRSLVMIDTPYLHGGVHLLK------------DEDTRKLR-------------------------YAMVYANILMINKLGGFTDIGALPLQGASAEDVLPLLVRHGLERGLPYSPDELRETIERFHRIAEANERAAESYEIADLPR-----------------------------------------------------------PGAVECHYFQRRTAGVYFDPSRFAGAMVERTNDYFRDKGCAEAWMRRLPRFSLHLTSATDHFSLLSEADP---FERIRDTCRRLY--------
>sce4133|gb|NC 010162.1| Proteobacteria (Delta) - Sorangium cellulosum So ce 56 TRANSATPKS-NRPS-T1PKS Thioesterase
----SFWCHGALG-FGQIFRPLSAALGED----YPVYALQARGVDGTRLPF--------HRLEDMLTHYVACIRSVQP--RG------PYCIGGYS-SGGILALELARELHRQ-------GETVARVILLDTYPSTPEVQRW-------------FAGFMDDDYL---------------------HVAVAAMLFAPGR--ADGLVSVEELQGTPPEVRLGHLASLLAERLGAGWSRDEIYILLQGAVNVARYTGQALHGYEPSRYNA------------------------------SDVLYFRAAAGFVDP----------------GRAGSGLTRGVGPDAPDHVAP-------------------WRDIVASRLDVVSVPADHFSLLSGPG---------LAVIKEHL---------
>b0586|gb|NC 000913.2| Proteobacteria (Gamma) - Escherichia coli str. K-12 substr. MG1655 NRPS Thioesterase
---TLFCFHPASG-FAWQFSVLSRYLDPQ----WSIIGIQSPRPN--GPMQT------AANLDEVCEAHLATLLEQQPHG--------PYYLLGYS-LGGTLAQGIAARLRAR-------GEQVAFLGLLDTWPPETQNWQE-------------K------------------------------------EANGLDPE-------------------VLAEINREREAFLAAQQGSTS-----------TELFTTIEGNYADAVR------------LLTTAH---------------SVPFDGK--------------------------ATLFVAERTLQEGMS----PER-------------AWSPWIAELD---IYRQDCAHVDIIS-------PGTFEKIGPIIRAT------
>ROP 02580|gb|NC 012522.1| Actinobacteria - Rhodococcus opacus B4 NRPS Thioesterase
---PLFCIHPGIG-LSWGYAGLLQHLSPD----RPAFGLQLPIISG-GT--------AVDSIEQLAHRYVLEMRKVQAHG--------PYHLLGWS-LGGVIAHAMAVELRRE-------GEAVDTLALMDS--YVA-NGTE-------------Q---------------------------GPETLTVAELLHGLGLDLES-V-----SGEELTY-ERAVELLDDAFGQKTGLTPR---------------HLERISAGFTNS-------------SRIMNNF--------------RPQVFDGD--------------------------LLFFTAAG--SASTGEH-SPEE--------------WRDSVTGGIREV--KIECEH-NQMIE------PEVLAVVGPV----------
>ROP 02610|gb|NC 012522.1| Actinobacteria - Rhodococcus opacus B4 NRPS Thioesterase
---PVFCVHPFIG-LAWSYAGLSRELTED----RPIYGLQSPALTEAEP--------HPGTITDFADRYVREIRSIQPHG--------PYHLVGWS-LGGVIAHEMAVQLQEA-------GEEVRLLGLLDS--YVG--LDR-------------S---------------------------VENTATTADLLGGAGLDLPEDGVLDELSPDGQFDAERAAALLRVVGGPLAALTAP---------------ELDRIYRNAQQA-------------PDLIDAH--------------RPRVFDGE--------------------------LVFFTAALDDG---FHVDPVTC--------------WGPYVRGRIDEH--PVDATH-WTMTT------PDALAAIAPHLARTQ-----
>ROP 51630|gb|NC 012522.1| Actinobacteria - Rhodococcus opacus B4 NRPS Thioesterase
---PLFCVHPGIG-LSWGYAGLVRYLPAD----RRAFGLQLPTISG-DG--------EYRSIEQLAHRYVEELKAIQPQG--------PYDLLGWS-LGGVIAHAMAVELQRA-------GDDVATLAVMDS--YPD-NGED-------------P---------------------------LFGKLDLRDLLRGLGLVVA--------TDSDLTY-ERAAQLLNESWGGDSGLRGE---------------HLERINAGYENS-------------RELVHRF--------------EPQVYDGD--------------------------LLIFPATGDDDGTTRAR-SADE--------------WRPLVTGRIAEY--PVDCGH-NDMIE------PQSLAVIGPVLSR-------
>ROP 51640|gb|NC 012522.1| Actinobacteria - Rhodococcus opacus B4 NRPS Thioesterase
---PLFCVHPGIG-LSWGYAGLVQYLPPD----RPAYGLQLPTISG-DG--------DYRTIEQLAHRYLDEMRAIQPTG--------PYDLLGWS-LGGVIAHAMAVELQAS-------GEQVGTLAVMDS--YPV-GGEE-------------P---------------------------PSGRLDIRDLLRGLGLQAD--------PDAEMTY-EHAARLIDESFGTETGVRGR---------------DLERISAGYENS-------------RWLAHHF--------------VPRAYDGD--------------------------LLIFSATGDGDGTTRAR-SADE--------------WRPLVTGRIDAR--PVDCGH-NDMIE------PQSLAVIGPVLS--------
>ROP 54870|gb|NC 012522.1| Actinobacteria - Rhodococcus opacus B4 NRPS Thioesterase
---PLFCIHPIVG-LAWCYTGLASRIDPD----RPIYGLQSPAIAGDDS--------LPASIDALAARYVAEIRGIQAQG--------PYDLLGWS-LGGVLAHAVAVQLQDA-------GDEVATLVMLDS-YAHQPHAAE-----------------------------------------TDVPVSVGDLLAGIG------VEAEVPAAVVDMTPESALDLLAAPGGPTAVLNRE---------------QLQALIASAAHQ-------------CALLEHH--------------RPGVFRGD--------------------------VAFFTAGRDDP---TGSEAAAT--------------WQPYVAGAVRNR--TVDSAH-WHMTS------PRVLRLVGSAL---------
>ROP 55220|gb|NC 012522.1| Actinobacteria - Rhodococcus opacus B4 NRPS Thioesterase
---PLFCVHPLSG-LAWCFSGLADHVG-D----RPLYGIQATGVPD-----------LPGTLSALAARYVDAIRVVQPDG--------PYHLLGWS-LGGTVAHEMAVQLRES-------GHEVAAPALLDTLLPQH---LP-------------P---------------------------EPETLTEDELIAQFG----------------------------------SYVSAD---------------RLREIRALIERL-------------ELIASTH--------------SPRRFDGN--------------------------LDLFVAARDLD---RHPDVVDA--------------WREHAGGVVTAH--HIDTTH-SEMAD------PGPLAEIGRL----------
>ROP 04690|gb|NC 012522.1| Actinobacteria - Rhodococcus opacus B4 NRPS Thioesterase
---PVFCIHPAIG-LAWCFTGLVQYLG-D----RPVYGLQSPALTDPDL--------RIDSLQELAGRYVDRIRSVQPHG--------PYHLVGYS-VGGQIAHEMAVQLTGA-------GDEVATLTMLDT--HLAGGLDR-------------T---------------------------AEK-PTMAALLAEFGAVVPRDG-------DDATTTERAVEVLRRTGGPFAAVTAD---------------DLDAVHRVFTQT-------------VDLALAH--------------RPSTPSGV--------------------------DLLYFGAADSV---DAPTGVSA--------------WRQHITGEILVH--HVPAAH-QQMTS------PEALAGIG------------
>ROP 19210|gb|NC 012522.1| Actinobacteria - Rhodococcus opacus B4 NRPS-T1PKS Thioesterase
---ALFCVHPAGG-LALGYAGLIRHLSPD----RPVYGLQLPILSG-GT--------TFESMEQLAHRYVVEMRAVQPRG--------PYHLIGWS-LGGVIAQAIAVELRES-------GAEVGTLAMMDS--YVA-EGDD-------------F---------------------------GDLEVNAEEWLHGLGVEFEG-G-----DDAGPSYREQLLDMLGRSFGRDPAFAST---------------LLGRISTGLENS-------------KQISTGY--------------RPRVFDGD--------------------------LLFFSAAQAADGEEGERPSPGV--------------WQPVITGLIVEN--KVECDH-LRMTT------PEALAVIGPILEN-------
>ROP 20370|gb|NC 012522.1| Actinobacteria - Rhodococcus opacus B4 NRPS Thioesterase
---PVFCFHPAGG-ISWGYSGLLRHIDPD----YPLYGVQASNLSTSKR--------PPETLEDMAAEYIEHMRTVQPTG--------PYHLLGWS-LGGVVAHAIAGALQNQ-------GEELGMLVMLDSFPSDAWAS-------------------MPTEQD--------------ALAALLYMVGYD--PEPLIAD--------------GLTRQQVIDILRGEGSALAGINE---------------HTPAAMIDNFANA-------------VRLESEP--------------SQIVVDSD--------------------------MLFFTAARNP--ATAATY----------------DLWRPYLTGTIVN--HDLDCEH-KDMTQ------PRWIGEVGS-----------
>ROP 21090|gb|NC 012522.1| Actinobacteria - Rhodococcus opacus B4 NRPS Thioesterase
---PLFCIHPAVG-LAWCYSGLSAYLRPD----RAVWGVQSPAVTAGGE--------RFTTITERAARYVQEIRRVQPRG--------PYHLLGYS-AGGVIAHAMAVELRSC-------GEEVGVLAMIDS--YAS-AER------------------------------------------DTPVPTLPELLAEFD---GAAA--------EQLGP-------------------E---------------QLARLYEDYVDV-------------VDAAADF--------------VPERFDGS--------------------------LLFFGAAG-------PPAACAT--------------WRPWIGGEVFAH--TIDRPH-AQMTD------PEALAVIGPILA--------
>ROP 33190|gb|NC 012522.1| Actinobacteria - Rhodococcus opacus B4 NRPS Thioesterase
---PLFWIHPISG-LSWCYTGFAEHLDEN----RPVFGIQTPAVVG-ET--------LPDSIEALAARYLAEVRRIQPEG--------PYDLAGWS-IGGVIAHAMAVQLQAA-------GQAVGSLVMLDS-FAETQQSRD-----------------------------------------TGDATVAGE-------------DEDTAAALSALSPDHA--------------DR--------------------LTAAAHHN-------------AGLMRDY--------------RPGLFDGD--------------------------VLFFTAAHDDP---SLRRAVGT--------------WRPWVNGRITNH--PVESTH-WQITE------PAAVRVIGPLL---------
>ROP 39430|gb|NC 012522.1| Actinobacteria - Rhodococcus opacus B4 T1PKS Thioesterase
---PVFVFHPAGG-STVAYEPLLKRLPEG----TPMYGFERTEG----------------PIDVRAAEYLPLIREIQG--DG------PYVLYGWS-LGGVLAYAVAKLLRES-------GADVRIVGLIDT--------------------------------------------------------------------------VMAGEKVEDTPDEIRKRWQRYAAFAKKTYNVDYP-LPYDKLA--AAESDEEQIKILTELLKL------------------------------SGTKIPGGIIEHQR-------------------------TSWLDNRAIQTAE--------------------LEQYDGDVVLYMADRYHDDVMNLEP---------AFKTRKPDGGWGDAVKN
>PA2302|gb|NC 002516.2| Proteobacteria (Gamma) - Pseudomonas aeruginosa PAO1 NRPS Thioesterase
---RLIALPPAGG-NAGTFRGWDARLPAD----VELLAIQYPGRQERQDEP------FVTDVEAMLCAIDDALLPLLDR---------PFALIGAS-LGGMLAYELAARLESLH------GLRARQLFVISSRAPGPDLEYP-----------------------------------------------------------------RFHAMGDAELLRTLREYDVLPLEVLDDPELREIS-----------LATLRADSRLAADYR---------------------------------------------------------------------YRPREPLAIPITAILGE----------------QDPGVSRVAIDGWRRHASRYELETLAGGHGLVVTAAEEVCAILRQRL-----
>PA3327|gb|NC 002516.2| Proteobacteria (Gamma) - Pseudomonas aeruginosa PAO1 NRPS Thioesterase
---PLFLVHPLGG-HVLCYLPLVRALPPD----QPVYALQAAGTGQGSTP--------LAVLEDIAASYLAAIRRVQPEG--------PYYLGGWS-FGGFVAYEMARQLRAL------DPQAVAQLIVLDSITVDRNHAGS-------------ASDE-------------------ALLLFFYWELVWFERSDKEVEPLPEGA-------SLEQKLDHIVERAIEAGVLPAGTP---------------RATVQRLYELFRAS-------------WQALIGY--------------RPEVSDQDMTLLRAD----------------GPLPLALKPMHDAAGTHYGDP---------------KNGWQHWTSGRLDVI---DVPGDHLVLMK------EPYVETVAAEIAALL-----
>PA4225|gb|NC 002516.2| Proteobacteria (Gamma) - Pseudomonas aeruginosa PAO1 NRPS Thioesterase
-----VLVHEGLG-TLLPYRPLLRALGEGRP----LLGLAVHDSDAYLAIPA------EHLNACLGRRYAEALHRAGLR---------EVDLLGYC-SGGLVALETAKSLVQR-------GVRVRQLDIVSSYRIPYRVDDE---------------------------------------------RLLLFSFAATLGLDTAALGFP-APERLGQAVQAALAQTPERLVAEALAG-----------------LPGLADLVALRGRVL-------------------------------QAASGSADAVSVER--------------------DTLYRLFCHSVRASQAEAPEPYVGALRLFVPDAGNPLVPRYAEALETQWRAAALGACGIHEVPGGHFDCLGEALAQSLSKP-------
>lpg2179|gb|NC 002942.5| Proteobacteria (Gamma) - Legionella pneumophila subsp. pneumophila str. Philadelphia 1 NRPS-T1PKS Thioesterase
---PLFLVHPIGG-SVFWYKLLGQYFDKD----RPLYGIQDPGLDRNELIF--------SNLEEMASAYVHSIQAIQP--SG------PYILGGAS-FGCTVAIEMAKQLEEK-------GETVISIISLDG-------------------------------------------------------------------------WAFYPSLQNNELYFQEVMKEQNSRILKKYIEN--NVSNSKFLLELQWHRENMLTQYKM-PIIK------------------------------PKFILFKAK------------------------------KLTEMFQYNASLN------------------WWENYTSQPIELHLTPGDHESMFYEPN---------IKILATKLNDSL-----
>YPO0776|gb|NC 003143.1| Proteobacteria (Gamma) - Yersinia pestis CO92 NRPS Thioesterase
---PVVILHEGSG-TVLPYLSLVDKLS--GP----IYGVNVTDSAAFLSIPA------ERLICQLASTYLPEIQKVGD----------QCHLVGYC-MGGLLAFEIARQALEN-------GRPVSSLTIISSYQIPYHINDP---------------------------------------------LMIDLVMSWTLGVEPP---WNLLKADLEGIYHAILADKPAVITVNAVVERAKANGLTALAN----EYACLQQQSNEVRLSQ-------------------------------LLTAIEQHSTASSH------------------VSRQPFDVFRHSIQGVCQYQPNYFAGDMTFVCQQGDTYLLPALQQDMTAFWQTYCLGQINRLTLPGDHFTCLSADNISPLIQHLEQC---
>YPO1910|gb|NC 003143.1| Proteobacteria (Gamma) - Yersinia pestis CO92 NRPS-T1PKS Thioesterase
---TLFVFHASDG-DISAWLPLASALN------RRVFGLQAK----SPQR--------FATLDQMIDEYVGCIRRQQPHG--------PYVLAGWS-YGAFLAAGAAQRLYAK------GEQ--VRMVLID--PVCRQDFCC-------------ENRA-------------------ALLRLLAEGQTPLALPEHFDQQTPD------------SQLADFISLAKTAGMVSQNLT---------------LQAAETWLDNIAHL-------------LRLLTEH--------------TPGES--------------------------VPVPCLMVYAAGRP-ARWTPA---------------ETEWQGWINNADDAV---IEASHWQIMME------APHVQACAQHITRWL-----
>STY0631|gb|NC 003198.1| Proteobacteria (Gamma) - Salmonella enterica subsp. enterica serovar Typhi str. CT18 NRPS Thioesterase
---TLFCFHPASG-FAWQFSVLSRYLSPS----WSIMGIQSPRPV--GPMQI------ATTLDEVCEHHLATLLARQPHG--------PYYLLGYS-LGGTLAQGIAARLRAR-------GETVAFLGLLDTWPPETQNWRG-------------K------------------------------------EANGLNPD-------------------VLAEIERERAAFVAAQQGNAS-----------DALFTAIEGNYADAVR------------LLTTAH---------------SAPFDGH--------------------------ATLFVADKTVPEDVS----PEQ-------------SWSPWIASLA---IYRQPCAHVDIIS-------PSAFETIGPIISELI-----
>PSPTO 2150|gb|NC 004578.1| Proteobacteria (Gamma) - Pseudomonas syringae pv. tomato str. DC3000 NRPS Thioesterase
---PLICLPPGGG-GTYSYYPLAGQLSDS----RPVYGLVNKAYVVPG--------WFDTSWQEMVAYYVEQIRTTQPQG--------PYNLLGWS-MGGALAIEVAHVLERE-------GDTVSFLGLVDTQLPAS------------------------------------------------------------------------------LAMEWVEEAPEVTTQKQGEN--------------------------------------------------------------------------------------------------------------------------------------YYRSLIKSLQAFVPGLQEASIVGLIDTAR----HSVASEGEVI---------
>PSPTO 2600|gb|NC 004578.1| Proteobacteria (Gamma) - Pseudomonas syringae pv. tomato str. DC3000 NRPS-T1PKS Thioesterase
---SLFVFHASDG-EVSAYLPLAQALD------MQVFGLQAT----NALG--------SASLKALAAQYEQAIRRQQASG--------PYVLLGWS-YGTFVAEETARLLLRQ------GEQ--VRLILLD--PVCRADLRF-------------DDRP-------------------GLLRLMAEGAKSIALPDDLEQLPAA------------EQLNVFMNNATQAGVLKNPPQ---------------AQQAEQWLQRIEHL-------------MTLLAQH--------------SQPRQ--------------------------LDLPCLWLSAEGRP-QHWLPA---------------EQDWQEWAATARRES---MPCDHWQLLLD------SDQVQRTAASISAWL-----
>PSPTO 2830|gb|NC 004578.1| Proteobacteria (Gamma) - Pseudomonas syringae pv. tomato str. DC3000 NRPS Thioesterase
---ALFLIHDFTG-LDAYFPVLGQHLQGD----FPIYGLPG--IGLGQQ--------QLRTLECLAARLVERIRQVQPRG--------PYRLAGWS-FGGVLAYEVATQLLGM-------DEAVTFLGLIDSYVPRLTDQGK-------------ARWQGPD----------------LLERQLLSHCIAHWQVQDETGSTALARLHSLGEQAALPDFETLLQLCRDEQLLYEELAQADD-----------RQLRHYLEREVAH---------------GHALAH-------------YQVEPLSLP--------------------------IHLFCAD--QRPMAPPGASATLG-------------WAEILPKGALQC-VSVPGDHMSMMQAP-------HVNTLGQRIGQAL-----
>PSPTO 2830|gb|NC 004578.1| Proteobacteria (Gamma) - Pseudomonas syringae pv. tomato str. DC3000 NRPS Thioesterase(2)
---PLFCVPGAGD-SVTSFIGLAEALGPD----WPIYGLQPRGLDGRSVPH--------SRVEAAAQSHVLAIEAMYP--QG------PLHLVGHS-FGGWAAHAMAVKLQAR-------GREVASLTLIDSEAPGGDG--------------------------------------------------------------------------------------------------------------------LSSKPYTATAALE------------------------------RLIEALQLS-------------------------------------------------------------SGKSLELDPLTFADCDGDTQLHLLQSA---------MVRIGLLPQRLAPQ---
>PSPTO 4519|gb|NC 004578.1| Proteobacteria (Gamma) - Pseudomonas syringae pv. tomato str. DC3000 NRPS Thioesterase
---HLFLVHAVGG-VVSPYIKLSQLMPDD----VSVHAFQAGGLEHG--------TDVVDTLEKMAAIYIEQMLEIQPEG--------PYWLGGWS-MGGVIAFEMARQLEAL-------DREVRQLLLIDAPAPGHAAQEQ--------------------------------------------------TWPLGAYLMDMARSLSVDLPLSASEMNQLIEHPDRDVLAIATMRRIG-------------VIPDSMDDQQVSRR-------------------------------------------------------------------LQIFCTHQQALEAYRPKTGINSN----------LTLLHTEESAELRDKWRPLCGQSFNATGFTADH--YSILEAATPCISKLF-----
>ABO 1784|gb|NC 008260.1| Proteobacteria (Gamma) - Alcanivorax borkumensis SK2 NRPS Thioesterase
---PLFCIHPVIG-LSWSYSGLTRYLDKE----QQLYGVQARGLATEPQQHGAAGLGLPTSITEMAGEYIEQLRRVQPAG--------PYKLLGWS-LGGLVAHEIARLLEAE-------GEEIGYLAVLDSYPYVQQPA-Q-------------LADEAQLVQS------------------ALTFMGLASDSLPQGEE----------------SMANLSDLLCREYDIHNLPFVK---------------EMQQSNGNIIES-------------VRLIIENNLVISRQ------FTPGKIKAA--------------------------MLFIAATETVETDMVDVLHN------------SADIWQEYVG-KLTIH--HVDCHH-QDMFD------APALTKTGPLIAD-------
>ABO 2092|gb|NC 008260.1| Proteobacteria (Gamma) - Alcanivorax borkumensis SK2 NRPS Thioesterase
---VLWCPHPVTG-RTTGYQALAASLEGQ----WQVRGLQSRSFLESG--------WFDPSLSEMVERYYRTVRQAQPEG--------PYYLLGWS-MGGAMSMELAHRLEQA-------GEEVAFVGLLDTYVPGHEVPED-------------------------------------------------QWSSPQAQQTLRAHLGMLLTCAPATALDDCMARLRDSKPAQWPQNFTQWLATQSIEAAVADSAAQLLHAWAVEQHLR------------------------------------------------------------------DLCWGYQLPALHTPVHS-----------------WWASEPAGRAQALQRGLALCAELAHTETVSADHLTIVREPSLLQGL-------
>RHA1 ro05102|gb|NC 008268.1| Actinobacteria - Rhodococcus jostii RHA1 NRPS Thioesterase
---PLFCVHPGIG-LSWGYAGLVRYLPAD----RRAYGLQLPTISG-DG--------DYRSIEQLAHRYVEEMKAIQPEG--------PYDLLGWS-LGGVIAHAMAVELQHA-------GDDVASLTVMDS--YPD-NGED-------------P---------------------------LFGKLDMRDLLRGLGLVVA--------NDGDLTY-ERAAQLLNESWGSDSGLRGE---------------HLERINAGYENS-------------RNLVHRF--------------EPQVYDGE--------------------------LLIFPATGDDDGTTRAR-SADE--------------WRPLVTGRIVEH--RVDCGH-NDMIE------PQSLAVIGPVLSR-------
>RHA1 ro05103|gb|NC 008268.1| Actinobacteria - Rhodococcus jostii RHA1 NRPS Thioesterase
---PLFCVHPGIG-LSWGYAGLVRYLPPD----RPAYGLQLPTISD-DG--------DYRTIEQLAHRYIEEMQAIQPTG--------PYDLLGWS-LGGVIAHAMAVELQAA-------GEEVATLAVMDS--YPV-GGED-------------P---------------------------PADRLEIRDLLRGLGLQAE--------GDGEMTY-EHAARLIDESFGTETGVRGH---------------DLERIAAGYESS-------------RWLAHHF--------------VPRVYDGD--------------------------LLIFPATRDGNGTTRAR-SADE--------------WRPLVTGRIDEQ--PVDCGH-NEMIE------PQSLAVIGPVLS--------
>RHA1 ro05452|gb|NC 008268.1| Actinobacteria - Rhodococcus jostii RHA1 NRPS Thioesterase
---PLFCIHPAAG-IAWCYAGLAEHLP-G----HVLYGVQATGATD-----------LPSSVAELAARHIDAIRAVQPAG--------PYHLLGWS-LGGTVAQEMAVQLHEA-------GHEVATLAMLDTLLPEHRAALV-------------N---------------------------LGDNRPELDLPAELG----------------------------------AAVSAD---------------RVQSLGELLIRL-------------EQIASTH--------------QPRHFDGD--------------------------AVFFTAAYDLD---HHPELVPD--------------WRTHFGGDVTEH--RIDAVH-ADMVG------RVPVSVIGRRLR--------
>RHA1 ro05468|gb|NC 008268.1| Actinobacteria - Rhodococcus jostii RHA1 NRPS Thioesterase
---PLFCIHPIVG-LSWCYSGLRQYIDSD----LPIYGIQSPSILEDSY--------LPESLDELADRYIREIRRIRPSG--------PYRLLGWS-LGGVIAHAMAIRIQAA-------GEGVELLAMMDS-FAGATAVEE-------------G---------------------------SPTDVSVSELLGGFG------IEETAVERISDPSLGGVAVALAEMSGHSVEQAVK---------------VVGRLVSAADRN-------------SRLMSEY--------------RPACFDGD--------------------------IVFFTAAADDA---TGARAARG--------------WENAVTGVVHNH--AVAVTH-WQMTS------PDALAVVGPILNE-------
>RHA1 ro06664|gb|NC 008268.1| Actinobacteria - Rhodococcus jostii RHA1 NRPS Thioesterase
---PIFCIHPASG-LAWCYAGLAPHIEPG----RRIYGLQSPELVEDDP--------HPRSIEQLAEQYVREIQAVQSDG--------PYRLLGWS-LGGVIAHAVATRLRLL-------GKQVSMLAMLDS---RFREAES-------------T---------------------------ANQEFTVEDILVELADLFGFGAE-DFDAAGETMSAEQATELIHLRTGAFEFLQPS---------------HVKRIVESFNDA-------------PRLVADY--------------RPVVFDGD--------------------------MVFFAAAAGEM---TQEIAESC--------------WNPYITGSIDYY--PIDATH-IRMTT------PRALAEIARVLNTYL-----
>RHA1 ro00141|gb|NC 008268.1| Actinobacteria - Rhodococcus jostii RHA1 NRPS Thioesterase
---PLFCIHPGIG-LSWGYAGLLQHLSQD----RPAFGLQLPIISG-GP--------SFESIEQLAHQYVLEMRKVQAHG--------PYHLLGWS-LGGVIAHAMAVELRRE-------GEAVDTLAVMDS--YVT-GGTD-------------Q---------------------------GPESLTVPELLHGLGLDLES-V-----SGEELTY-ERAVELLDDAFGQKTGLTPQ---------------HLERISAGFTNS-------------SRIMNNF--------------RPQVFDGD--------------------------LLFFTAAG--SASTDQH-SPEE--------------WRSSVTGGIREV--KIECEH-NQMIE------PEVLAVVGPVL---------
>RHA1 ro00144|gb|NC 008268.1| Actinobacteria - Rhodococcus jostii RHA1 NRPS Thioesterase
---PLFCVHPFIG-LAWSYAGLGRELTQD----RPIYGLQSPALTEDEP--------HLETITDFAARYVREIRSIQPHG--------PYHLVGWS-LGGVIAHEMGVQLQDA-------GEEVRLLGLLDS--YVG--IDR-------------S---------------------------VENSATTADLLGGVGLDLPDDSVLDELAPDGQFDAERAAALLRVVGGPLAALTAT---------------ELERIYGNALRA-------------PALIDAH--------------RPRVFDGE--------------------------LVFFTAALDDG---FHVDPVTC--------------WGQFVRGSIDEH--PVDATH-WTMTT------PDALAAIAPHLERSH-----
>RHA1 ro00232|gb|NC 008268.1| Actinobacteria - Rhodococcus jostii RHA1 NRPS Thioesterase
---PLFCVHAGMG-LAWAYTGMVRHLSPD----RPVWGLQLPSLGG-GP--------EYDSIEDLAHRYLDEVRAVQPAG--------PYHLLGWS-LGGLIAHAMATELQDR-------GEEVASLVLLDS--YAG-EPIA-------------E----------------------------PDPLDVGDLLRGLGVDVGPGA-----NSRPLRY-SDASDRLREAYGPAAAMTAD---------------QLRRIAEGYDRS-------------TRLAARF--------------APRVFRGD--------------------------ALLLIAEDG---------PHDG--------------WGDSITGTVQEE--HVDCGH-NDMMQ------PKPARAIGMLVE--------
>RHA1 ro00433|gb|NC 008268.1| Actinobacteria - Rhodococcus jostii RHA1 NRPS Thioesterase
---PVFCIHPAIG-LAWCFTGLVQYLG-D----RPVYGLQSPALTDPDL--------RVDSLEDLAARYVQRIRAVQPHG--------PYHLVGYS-VGGQIAHEMAVQLTEG-------GDEVATLAMLDT--HLTGGYGP-------------T---------------------------TEK-PTVAALLAELGAVVPGDG-------DAAATTDRAVEVLRRTGGLFAAVTAD---------------DLDAVHRVFTQT-------------VDLALAH--------------RPSTPIRA--------------------------DLLFFGAADSV---DAPTGVCA--------------WRPHISGEIIEH--AVPVSH-QQMTS------PEALAGIG------------
>RHA1 ro02207|gb|NC 008268.1| Actinobacteria - Rhodococcus jostii RHA1 NRPS-T1PKS Thioesterase
---ALFCVHPAGG-LALGYAGLMKYVSPD----RPVYGLQLPILSG-GT--------TFESMAQLAHRYVVEMRAVQPHG--------PYHLLGWS-LGGVIAQAVAVELRES-------GAEVGTLAMMDS--YVA-EGDN-------------F---------------------------GDLEVNAEEWLHGLGVEFEGEG-----GDTGTSYREQLVEMLGRSFGRDPAFAST---------------LLGRISTGLENS-------------KEISTGY--------------RPRVFDGD--------------------------LVFFSAAHSADGEEGERPSPSV--------------WQPAITGVIVEH--KVECDH-LRMTT------PEALAVIGPILERS------
>RHA1 ro02319|gb|NC 008268.1| Actinobacteria - Rhodococcus jostii RHA1 NRPS Thioesterase
---PVFCFHPAGG-ISWGYSGLLRHIDDD----YPLYGVQASNLSTSER--------PPETLEDMAAEYIEHMRTVQPEG--------PYHLLGWS-LGGVVAHAIAGALQNQ-------GEELGMLVMLDSFPSDAWAS-------------------MPTEQD--------------ALAALLYMVGYD--PEPLLASDT------EPHRGGGLDRQQVIDILRGEGSALAGINE---------------HTPAAMIDNFANA-------------VRLESEP--------------SQIVVDSD--------------------------MLFFTAARNP--ATAATY----------------DLWRPYLTGTIVN--HDLDCEH-KDMTQ------PRWIGEVGS-----------
>RHA1 ro02397|gb|NC 008268.1| Actinobacteria - Rhodococcus jostii RHA1 NRPS Thioesterase
---PLFCIHPAIG-LAWCYAGLGAHLGPD----RPVWGVQSPAVTVPGE--------RFASITQRAHRYVEEIRRVQPRG--------PYHLLGYS-VGGVIAHAMAVELRSR-------GEEVGVLAMIDS--YAA-AER------------------------------------------DTPAPTLPELLTEFG---GGAS--------EHLGP-------------------E---------------QLTRLYEDYVDV-------------VDAAADF--------------VPGHFDGD--------------------------LVFFGAAGNGS---QPAPASET--------------WRPWIDGDVIAH--TVDRPH-TRMTD------PEALAVIGPILAEY------
>RHA1 ro04065|gb|NC 008268.1| Actinobacteria - Rhodococcus jostii RHA1 T1PKS Thioesterase
---PVFVFHPAGG-STVAYEPLLKRLPEG----TPMYGFERTEG----------------PIEVRAAEYLPLIREIQG--DG------PYVLYGWS-LGGVLAYAVAKLLRES-------GADVRIVGLIDT--------------------------------------------------------------------------VMAGEKVEDTPDEIRKRWQRYAAFAKKTYNVDYP-LPYDKLA--AAESDEEQIKILTELLKL------------------------------SGTKIPGGIIEHQR-------------------------TSWLDNRAIQTAE--------------------LAQYDGDVVLYMADRYHDDVMNLEP---------AFKTRKPDGGWGDAVKN
>ABAYE3754|gb|NC 010410.1| Proteobacteria (Gamma) - Acinetobacter baumannii AYE NRPS Thioesterase
---PLWLFHPIGG-STFCYMELSRHLNPN----RTLRAIQSPGLIEADAAE--------VAIEEMATLYIAEMQKMQP--QG------PYFLGGWC-FGGAIAYEISRQLRQM-------GQQVTGIVMIDTRAPIPEN----------------VPEDADDAML---------------------LSWFARDLAAP----YGKKLTIPAQYLRELSPDQMFDHVLKEAKAINVLPLDADPSDFRLYFDTYLANGIALQTYFPEPED---------------------------------FPILLVKAKD---------------------------EQEDFGESLGWD----------------------QLVKDTLTQVDLPGDHSSIMYAEN---------VVAVAQTIDQMY-----
>AB57 0157|gb|NC 011586.1| Proteobacteria (Gamma) - Acinetobacter baumannii AB0057 NRPS Thioesterase
---PLWLFHPIGG-STFCYMELSRHLNPN----RTLRAIQSPGLIEADAAE--------VAIEEMATLYIAEMQKMQP--QG------PYFLGGWC-FGGAIAYEISRQLRQM-------GQQVTGIVMIDTRAPIPEN----------------VPEDADDAML---------------------LSWFARDLAAP----YGKKLTIPAQYLRELSPDQMFDHVLKEAKAINVLPLDADPSDFRLYFDTYLANGIALQTYFPEPED---------------------------------FPILLVKAKD---------------------------EQEDFGESLGWD----------------------QLVKDTLTQVDLPGDHSSIMYAEN---------VVAVAQTIDQMY-----
>ABBFA 003403|gb|NC 011595.1| Proteobacteria (Gamma) - Acinetobacter baumannii AB307-0294 NRPS Thioesterase
---PLWLFHPIGG-STFCYMELSRHLNPN----RTLRAIQSPGLIEADAAE--------VAIEEMATLYIAEMQKMQP--QG------PYFLGGWC-FGGAIAYEISRQLRQM-------GQQVTGIVMIDTRAPIPEN----------------VPEDADDAML---------------------LSWFARDLAAP----YGKKLTIPAQYLRELSPDQMFDHVLKEAKAINVLPLDADPSDFRLYFDTYLANGIALQTYFPEPED---------------------------------FPILLVKAKD---------------------------EQEDFGESLGWD----------------------QLVKDTLTQVDLPGDHSSIMYAEN---------VVAVAQTIDQMY-----
>Sare 0362|gb|NC 009953.1| Actinobacteria - Salinispora arenicola CNS-205 NRPS Thioesterase
---PLFCVHPGGG-SAHWYLRLVPHLAPD----IPVAAFEWPATHD-----------EIPTAEQMAERYLAELRAAQPRG--------PYRLFSWC-GGSSIATEMARSLTEAG--------EEVTFILLDPGLDAHTRAEG--------------------------------------------WQELDYIRRLETLIEHIVADPQADTTDRRTEILALLDHLVDDVDPAVGITLPAQGVGDVWPRSVRIWREVMELDLAYRHNPYSG---------------------------------------------------------------QLHLVVSDELERGEHEVAIGQTFG---------DYVARWRELVEGGVTVHRVPGDHFGVMKP-------PHVAELGA-----------
>Sare 3151|gb|NC 009953.1| Actinobacteria - Salinispora arenicola CNS-205 T1PKS Thioesterase
----ACIVPPIAPMIDTAYALFAQGLPE----PREVSAVRPLGFV----AGE----PLPADLPSLFRVYGDMLLEESGID--------PVAVVGHS-SGGWIAYGVAAYLCGI-------GRPPAALVLLDTSWPGEFEIGV-------------QRDFMRAQAKR-HELGS------------------------------------DDGASLGHQLIAMGGYLRM--FDDWKP--------------------QLIEVP--------------------------------------------------------------------------SLLVRAAEYMTGAAKP-----------------DEVLRANDGTVRDVASVPGNHFSMMSKYPV----ETATAVHTWL---------
>Sare 4562|gb|NC 009953.1| Actinobacteria - Salinispora arenicola CNS-205 NRPS Thioesterase
---PLFCIHPGAA-ICWSYADLLLHLSPD----FPVYGLQSPALSHPDE--------LPETLIQVADDCIEEMRQVQKTG--------PYYLLGQS-FGGVVAHAMAARLEAA-------GEQVGLIVALDSEPSRSLSEHE-------------Q---------------------------AQVIEATAKVYTGILEVLGVDP---AALPSGNLTFAQFSELARTTNTLLGNVAED---------------EFHLLMAILHGN-------------ISIATRH--------------RSERVDAD--------------------------MLIFGAAEERE----RVLDPEV--------------WREFVGGEITYH--PIPTSH-STIMA------PEALQVIGPILEQH------
>Sare 2072|gb|NC 009953.1| Actinobacteria - Salinispora arenicola CNS-205 NRPS-T1PKS Thioesterase
---PLFLIHPSGG-DVLCYGELARLLADD----RPVVGLTDP-ALTGGVG--------PTDIPALAEHYLDAVRQHQPHG--------PYLLGGWS-MGGTLAHEMACLLERR------GER-TALLLMIDSNTPDRIRTLH-------------GQGAPQAI---------------AAVRYLHSLAAFLDLDLGFGPAEEA---------ELLDRTGDDIRRAVTQRLRDAGLLSR-------------RDTADTRLLVFERH-------------LRILGEH--------------RAGHLS-------------------------DPTTRLLLVRAALPSPHNSGVGMGVDDAPD----LSRLGWDGHVRGPIHEV---VVEGHHYSLLT------GDAAKTIAEHLNRTL-----
>Sare 2407|gb|NC 009953.1| Actinobacteria - Salinispora arenicola CNS-205 T1PKS-NRPS Thioesterase
---ALFCFPPAGG-HGLVYRQFAAQLPEW-R-IVGLNYLAGDDK---------------------VARYADLVERLQPAG--------PWLLLGYS-LGGNLAFEVTKELEGR-------GRAVRDVIIVD------------------------SYRIVEPFEFG-----------------------PDEFAAFERELAEHLLRHTGSEIVARETREQAREYIEFCRQTPNTG-------------------MVQAAVT----------------------------------------------------------------------VLSDRDKTALYAAGERGSWTGASAR------------GDTLLAGSGTH--AEMLDQEHAVHNA--------ALIREVL------------
>Sare 2962|gb|NC 009953.1| Actinobacteria - Salinispora arenicola CNS-205 NRPS Thioesterase
---RLYCLHAVSG-SPYWYLPLSRALHPE----QPLDGFEAPGLEGDAEPV--------EDLTALAARYVDALRERQP--AG------PYLLAGWS-MGGFLSFEMARQLAAV-------GESPALVAMIDSNEPGPLPLPS-------------EQEVMET-----------------------------------------FVSDLGGLAGTAPPVLPAEIARAASTD------PAVLTAFLVEHGMVPADVRADF--------VS------------------------------HRYRVFRANMRAVYG----------------YRPGPYAGRVVMVQAAEEPSR------------------AAWARHAGAMETVTLPGNHYSLWSAAH---------LPGLAAMIDARV-----
>Radicicol
APPPFYMIADGTG-SIATYIHLASSLQSKMP----IYGIDSPFLRCP------DRLTPEVGIPGAARLIVDALLKKQPDKDV------PFWIGGFS-GGAMVAYEVCRQLSAA-------GRPVDGLLLIDMCAPRQ---VA---------AVPEDDGEVGLAMFDA--------------------------------------VSGQDESGVWSATDGTRRHLGAMFSCVATYNPEP--------------LPPRGGGN-------------TPAKRAAMIWARKG----------------MIDRCVSSVRFRQMLADRGISPEPYPGFMEDPKLGAVAWSLPHKTGAD------------LGPNGWERYLGGDRLLCMSIEA--DHLEMPTPGYAQLLGETMDKAFR----------
>dehydrocurvulacin
-----YMMADGTG-TIATYIHLP-AFKSKMP----VYGIDSPFLRCP------SRLTKDVGIPGVAKLIVDALVTAQPTG--------PLMIGGFS-AGSIVAYEVTRQLGAL-------GRQVTGLVLIDMCCPRSSLLDE---------DAMNSEDDASFAIFEN--------------------------------------AVSKD--GLWSLASTTQDHFRAYHVAMHAYHPPY--------------MTAQ-----------------ERPSHTAVIWAEKG----------------MVNRVVGNDRLMQMLADQGIPTTSYPGYMEDPRLGAFACLVPDRTAAD------------LGPNGWEKYTAG-EVLALSVAG--DHLDL----------------------------
>DebsTE
-VTVICCAGTAAISGPHEFTRLAGALRG----IAPVRAVPQPGYE----EGE----PLPSSMAAVAAVQADAVIRTQGDK--------PFVVAGHS-AGALMAYALATELLDR-------GHPPRGVVLIDVYPP---GHQD-------------AMNAWLEEL-------------------------TATLFDRET--------VRMDD----TRLTALGAYDRL--TGQWR--------------------PRETGLP--------------------------------------------------------------------------TLLVSAGEPMGPWP---DDS--------------WKPTWPFEHD--TVAVPGDHFTMVQ--EH--ADAIARHIDAWLG--------
>FenTE
---NLFCFPPISG-FGIYFKDLALQLNHKAA-VYGFHFIEEDSR---------------------IEQYVSRITEIQPEG--------PYVLLGYS-AGGNLAFEVVQAMEQK-------GLES-DFIIVD---AYK-KDQS-------------ITADTENDD--------------------------SAAYLPEAVR--------------ETVMQKKRCYQEYWAQLINEGRIKSN--------------IHFIEAG-------------------------------------------------------------------------IQTETSGAMVLQKWDA--AEEG-------------YAEYTGYGAH--KDMLEGEFAEKNA--NI--ILNILD---------------
>PikTE
-AVLVGCTGTAANGGPHEFLRLSTSFQE----ERDFLAVPLPGYGT--GTGTG-TALLPADLDTALDAQARAILRAAGDA--------PVVLLGHS-GGALLAHELAFRLERAHG------APPAGIVLVDPYPP---GHQE-------------PIEVWSRQLG-------------------------EGLF--AGELE------PMSD----ARLLAMGRY-AR--FLAGP-------------------RPGRSSAP--------------------------------------------------------------------------VLLVRASEPLGDWQ---EERG------------DWRAHWDLPHT--VADVPGDHFTMMR--DH--APAVAEAVLSWLD--------
>CuracinTE
FGGNQICLCSWGSPEHPVVLCIHGILEQGLAWQEVALPLAAQGYRVVAPDLFG---HGRSSHLEMVTSYSSLTFLAQIDRVIQELPDQPLLLVGHS-MGAMLATAIASVRPKK----------IKELILVELPLPAEESKKE------------------------------------------------------------------SAVNQLTTCLDYLSSTPQHPIFPDVATAASR--------------LRQAIPSLSEEFS--------------------------------------------------------------------YILAQRITQPNQGGVRWS-----------------WDAIIRTRSILGLNNLPGGRSQYLEMLKS------IQVPTTLVYGD------
>SurfactinTE
--QIIFAFPPVLG-YGLMYQNLSSRLPSY-K-LCAFDFIEEEDR---------------------LDRYADLIQKLQPEG--------PLTLFGYS-AGCSLAFEAAKKLEGQ-------GRIVQRIIMVD---SYKKQG-V-------------SDLDGRTVESD-----------------------VEALMNVNRDN-----EALNSEAVKHGLKQKTHAFYSYYVNLISTG-------------------QVKADID------------------------------------------------------------------------LLTSGADFDIPEWLASWEEATTG------------AYRMKRGFGTH--AEMLQGETLDRNAG--------ILLEFLN-----------
>Tiacumicin (R-ester)
--RLICVPSPMGLGGAHQYARLATALRG----TREVHALSIPGFR----QSE----ALPESAGAAVEWLAASLLQIVGDE--------PYALVGYS-SGGLFAQRLAGLLED-------RGRPAAGLVLLDTYLPDS-AAME--------------QFATPMLEGLFAR-------------------------------------EESFGPFTSARLSAMGRYVRL--IAECEA--------------------PPVTTP--------------------------------------------------------------------------TLFVRP-------AELFRVDGADPDAAPAVS-----WRATWPSAAATVEVPGNHFTMLESEAA----GTARVIEQWL---------
>TesA (P.aeru esterase)
-----MRALLLSG--CLALVLLTQQAAAQT---LLVVGDSISAALG------------LDTSQGWVALLQKRLADEG----------YDYRVVNASISGDTSAGGLARLPALL-------AEEKPALVVIELGGNDGLRGMAP---------------------------------------------------------------AQLQQNLASMAQKARAEGAKVLLLGIQLPPNYG------------PRYIEAFSRVYG------------------------------------------------------------------------AVAAQEKTALVPFFLEG-----------------VGGVQGMMQADGIHPALAAQPRLLEN--------VWPTLKPLL---------
>FabA
----------VDKRESYTKEDLLASGRGE------LFGAKGPQLPAPNMLMMDRVVKMTETGGNFDKGYVEAELDINPDLWFFG-----CHFIGDPVMPGCLGLDAMWQLVGF------------YLGWLGGEGKGRALGVG-----------------------------------------------------------------EVKFTGQVLPTAKKVTYRIHFKRIVNRR----------------------------------------------------------------------------------------------------LIMGLADG---------------------------EVLVDGRLIYTASDLKVGLFQDTSAF-------------------------
