# Supplementary material for: Polyketide synthase and non-ribosomal peptide synthetase thioesterase selectivity: logic gate or a victim of fate?
Source: Royal Society of Chemistry journal article supplement (doi:10.1039/c4np00148f), 2015-02-02
Supplement: c4np00148f9.meg [file c4np00148f9.meg]

#mega
!Title Phylogenetic Analysis;
!Format DataType=Protein indel=-;

#aveA4|gb|AB032367.1|_Actinobacteria_-_Streptomyces_avermitilis_Avermectin_T1PKS_Thioesterase
--ALICLPTVAAVSSVYQYSRFAAGLNG----HRDVWYVPAPGFL----EGE----PLPS
GIGAVTRMFADAIVRFTDGA--------PFALAGHS-AGGWFVYAVTSHLER-------L
GVRPEAVVTMDAYLP--DDGIA-------------PVASALTSEIFD--R----------
--------------------------VTQFVDVDYTRLVAMGGYFRI--FSGWSP-----
---------------PDITTP---------------------------------------
-----------------------------------ALFLRGRD-----------------
--GE------QMPPPWGVPHTVLDIQGNHFTML---------------------------
-

#Q03093_STRHY/15-243
--ARVVCLSRAGGSSARDFDRWRAPMGED---HVELAAVQLPGRLDRFHEP------PLS
DLHEIAEEVAAALTTLPARA--------PYVLFGDC-MGALLAFETACALRRR------G
AAPPDCLVVASYPAPDRDLRTERPYGDGSAD----PVASALTSEIDL-------------
---RQRLREVGGV--PPAVLDEDE-LFELMLPMLRADFAAFEGYRRI--FSGWSP-----
HRPTEPL--------PDITTP---------------------------------------
------------------------------SVDIHALVGADDPYVTVT--DLHG------
--GE-----WQRHTTGEFTHTARALPGGHFFLHE-SDD--AVSRVRSLALAG--------
-

#Q00442_SACER/16-240
--ARLVCFPHAGVAAADSYLDLARALAP----EIDVDAVQYPGRQDRRDEE------PLG
TAGEIADEVAAVLRASGGDG--------PFALFGHS-MGALIAYETARRLERE------P
GGGPLRLFVSGQTAPR-DVHERRTDLPGDDG----PVASALTSEIFL-------------
---VDELRRLG-T---SEAALADEALLAMSLPVLRADYRVLRSYAWI--FSGWSP---AD
GPPLRAG--------PDITTP---------------------------------------
---------------------------------ITALCGDADPLTATG---DAER-----
--GE-----WLQHSVIPGRHTTRTFPGGHFYLG---EQ--VTEVAGAVRRDL--------
-

#P72176_PSEAI/17-239
--LRLACFPHAGGSSASFFRSWSERLPP----DIDLLALQYPGREDRFNEA------PAT
RLEDLADGAALALRDFADAA--------PLALFGHS-LGAALAYETALRLETP------L
GAALRHLFVSAHPAPHRDQRGGALHRGDEAA----PVASALTSEIFL-------------
---LEDVRRQGGA---S-ELLEDADLRALFLPILRADYQAIETYRRI--FSGWSP----R
AQPIALA--------PDITTP---------------------------------------
-------------------------------CALDVLLGEHDEEVSAA---EAQA-----
--GE-----WSDASRTPARHTLRRFPGGHFYLSE---G--RDAVIEHLLRRL--------
-

#Q03094_STRHY/25-253
--VRLLCFPHAGVAGPGVYRPWAEDMPS----YAELWAARYPGREDRLAHP------FAT
SLSELADDLAAAAAAGLSRD-------VPLALFGHS-MGAVIAHEVAVRLENN------H
DFRPVLLAVSAREGPLQDVAHAGLHLLDDDA----PVASALTSEIFL-------------
---VARTRGMGIQ--PNADAYADPELRELLLPVLRDDCRLLETHPRI--FSGWSP-----
TSPVTRV--------PDITTP---------------------------------------
------------------------------RAPVLAFAGRSDPASPAA--LMSS------
--GE-----WAEATSGAFRHTLLEMPGDHFYLFS---H--TKDLLSELIPAL--------
-

#PABT_STRGR/128-352
--VRLVCFPHAGGSSASFYHPVSARFAP----GAEVVSLQYPGRQDRRKEP------CVP
DLGTLADLITEQLLPLDERA--------PTVFFGHS-MGAALAFETAWRLEQK------G
AGRPRTVIASGRRGPSTDTRAERVHTRDDDG----PVASALTSEIFI-------------
---VAEMKRLNGT---AAGVLGDEEILRMALPALRGDYRAIETYTRI--FSGWSP-----
CPPDRRL--------PDITTP---------------------------------------
------------------------------ACGLTVLTGEDDPLTTVE---EAER-----
--GE-----WRDHTTGPFRHTLRVFTGGHFFLT---QH--LDAVNTEIAQAL--------
-

#Q54145_STRFR/15-245
--HRLVCFPHAGGSSARAYRPFALELAAA---GVETHAVQYPGRQDRRKEP------FAR
TLEELAERVLPELRRLLDAPDG-----VPVALFGHS-MGAVVAYETARLLHRS------G
APRPAGLILSGRRAPTADDRTETAHLLGDRE----PVASALTSEIFL-------------
---LAEIRRLQGT---DPGALADEEVLRMVLPAIRGDYAAVGRYRRI--FSGWSP-----
HVPGPRP--------PDITTP---------------------------------------
------------------------------GCPLTVFTGDADPNVTLP---EAEA-----
--GE-----WRELTTGAFAHTLRVFPGGHFYLN---DQ--REAVCRTIEETL--------
-

#MBTB_MYCTU/1188-1413
--GAVLVFPHAGGSAAAAYRWLAKSLVAN---DVDTFVVQYPQRADRRSHP------AAD
SIEALALELFEAGDWHLTAA--------PLTLFGHC-MGAIVAFEFARLAERN------L
GVPVRALWASSGQAPSTDVAASGPLPTADRD----PVASALTSEIFV-------------
---LADMVDLGGT---DPVLLEDEEFVELLVPAVKADYRALSGYSRI--FSGWS------
CPPDVRI--------PDITTP---------------------------------------
----------------------------R--ANIHAVGGNRDHRISREMLTS--------
--GE-----WETHTSGRFTHTLSHFDGGHFYLN---DH--LDAVARMVSADV--------
-

#TESA_MYCTU/29-254
--PTLYIFPHAGGSTAKDYVAFSREFSAD---HVKRIAVQYPGQHDRSGLP------PLE
SIPTLADEIFAMMKPSARID-------DPVAFFGHS-MGGMLAFEVALRYQSA------L
GHRVLAFFVSACSAPGHDIRYKQLQDLSDRE----PVASALTSEIFM-------------
---LDLFTRMTGM--N-PDFFTDDEFFVGALPTLR-AVRAIAGYSRI--FSGWSP-----
CPPETKL--------PDITTP---------------------------------------
------------------------------SCPIYAFIGDKDWIATQD--DMDP------
--GE-----WRDRTTEEFSHTIRVFPGDHFYLN---DN--LPELVSDIEDKT--------
-

#SRFAD_BACSU/14-234
--TQLICFPFAGGSYSASFRPLHAFLQG----ECEMLAAEPPGHG-TNQTS------AIE
DLEELTDLYKQELNLRPDRA--------PFVLFGHS-MGGMITFRLAQKLERE------L
GIFPQAVIISAIQPPHIDQRKKVSHLPDDQ-----PVASALTSEIFF-------------
---LDHIIQLGGM---PAELVENKEVMSFFLPSFRSDYRALEQFELI--FSGWSP--YDL
AQIQSP---------PDITTP---------------------------------------
---------------------------------VHVFNGLDDKKCIRD----AEG-----
--GE-----WKKWAKDITPH-FHQFDGGHMFLL----SQ--TEEVAERIFAIL-------
-

#ANGT_VIBAN/17-246
--THYVLCPFAGGSGSGAFRHWRTLSLEN---HEVISVMLYPGREFRIDDP------TVI
NIGTLAEEMIQALKTCNQRI-------EDTIIVGHS-MGAQVAYEASKKLVNQ------L
GLFLKGLIISGCQAPHIKGRRLLGECDDKT-----PVASALTSEIFF-------------
---IHNLVEIGGC---DPSLAKSPEWWPIFLPALRADFTATEQYIFI--FSGWSP---TS
LPNDKEG--------PDITTP---------------------------------------
-----------------------------LPIPTLLISGDQDREANFS--EIEE------
--GE-----WKLWCNKVVDHTHLVVEGGHFYITE------QPQMMLECIRAL--------
-

#Q56949_YERPE/19-252
--AHLVMCPFAGGSSSSAFRHWQAEQLTD---HCALSLVTWPGRDRLRHLE------PLR
SITQLAALLANELEASVSPD-------TPLLLAGHS-MGAQVAFETCRLLEQR------L
GLAPQGLIISGCHAPHLHSERQLSHRDDAD-----PVASALTSEIFF-------------
---IAELIDIGG---CSPELRENQELMSLFLPLLRADFYATESYHYDS-FSGWSP-PDVC
PPLRTP---------PDITTP---------------------------------------
---------------------------------ALLLCGSHDREASWQ--QVDA------
--GE-----WRQWLSHVTGHTPVVIDGDHFYPIQ-QARSFFTQIVRHFPHAF--------
-

#O30412_BREBE/1-235
--MKLFCFPYAGGSLPGIYYSWKSRLPPTFL-EIDAFEVRPHIPQPNRDVF------LPT
SFYELLEDVCDRITPALTET--------PFAFFGHS-MGGLVAFELTRKLMQK------G
APLPQHLFLSASRAPHAYGKLAKTYNLPHDE----PVASALTSEIFF-------------
---VEALRKLGGT---PDDVLENQELLELFLPILRADFQAVQTYEMI--FSGWSP--NPD
LPRQVP---------PDITTP---------------------------------------
-------------------------------VNMTVLYGTEDTIALED---IWA------
--GE-----WRDYCQGACQHTFFPVSGGHFFIHH-QTS--PILEIIQNVLKEE-------
-

#GRST_ANEMI/22-248
--LRLFCIPYAGGSGASAFYEWSHFFPK----EIEVCSIQLPGRENRGAEV------PLT
NLQQIVEIVAEEIQPLINIA--------PFAFLGHS-MGALISFELARTIRQK------S
NVNPVHLFVSGRHAPQIPCAKQDYHLLPDEQ----PVASALTSEIFF-------------
---IQELRSLNGT---PEIVLQDAEMMSILLPRLRADFSVCGSYQYI--FSGWSP--KND
EPFECP---------PDITTP---------------------------------------
---------------------------------ITAFGGKNDNGVTYQ--SLEA------
--GE-----WREQTKREFSHTVCMYPGDHFFLYE---S---KYEMIEFMCKQL-------
-

#SAST_ANAPL/16-246
--CRLICFPWAGGSNCSFFIRWCEAFSS----IIVVSVIRLAGRECRDTEP------FPE
DMAEVVNEITNALLKDLQEK--------PFALFGHS-FGSFVSYALAVHLKEK------H
GLEPVHMFFSGSYGPHSEYFHLMYKLPEVEDS---PVASALTSEIRL-------------
---LELIHTLGGT---PPEFLQNEQITKHLLRVLKEDQKVLVTYPWI--FSGWSP---HD
VRKKYFS--------PDITTP---------------------------------------
-------------------------------CDLTCFNGSDEKNHGSEA-----------
--GE-----WIAITSGDTSHTIYSLPGNHFYLME-PSN---ETFLIKYITKCI-------
-

#SAST_RAT/27-256
--FKLICFPWAGGSGSIHFAKWGQKINDS---HLEVHAVRLAGRETRLGEP------FAN
DIYQIADEIVTALLPIIQDK--------AFAFFGHS-FGSYIALITALLLKEK------Y
KMEPLHIFVSGASAPHSTSRPQVPDLNELTEE---PVASALTSEIQV-------------
---RHHLLDFGGT---PKHLIEDQDVLRMFIPLLKADAGVVKKFIFI--FSGWSP----D
KPSKALL--------PDITTP---------------------------------------
------------------------------SLDITGFLGSEDTIKDIEG-----------
--GE-----WQDLTSGKFDHTVHMLPGDHFYLMK-PDN---ENFIKNYIAKC--------
-

#P72117_PSEAI/7-233
--LQLFCLPYSGVASARLFRRWQPSLPG----WIRLLPLELPGRGLRFGEA------LHT
DAASLVAQLAGELQGTLDSA-------SPYAFFGHS-LGGLLAFELAHAMRRR------G
LEGPLALFLSGVSPPAENDVSGYRRAKADAE----PVASALTSEIFL-------------
---VAALRDYRGT---PEAVLNDPSLMQMLLPVVRADFSSPAATARI--FSGWSP---TR
RMALD----------PDITTP---------------------------------------
-------------------------------AALHLFGGREDSLRS--AELLG-------
--GE-----WLHEAGGDFTHTLDLLDGQHFFIRE---Q--QGQLLRLLRRYA--------
-

#O30482_STRHY/1725-1933
--RVVCVPAVTPAATPHEYDALGRRLDG----VLASAVLPYPGFG----AGQ----AMPE
DRRTLVGMHARSVLDHVGDE--------PYVLVGRS-LGGTVAHAVTSELERL------L
GRGPRGLVLIDTYLPLDDASRA-------------QEWLLGLPEIFD--R----------
---------ARAAVEEGA--------VTPDDDVDYAALLAMGAYLRA--FADWTP-----
--------------RYAVTTP---------------------------------------
-----------------------------------PLFLRPGRPTPAMP---RKDG----
--GE-----WQATWPLPHDHTLIEVAGDHFTVLT--DE--VADTAEALLGWL--------
-

#ERYA3_SACER/2958-3167
--TVICCAGTAAISGPHEFTRLAGALRG----IAPVRAVPQPGYE----EGE----PLPS
SMAAVAAVQADAVIRTQGDK--------PFVVAGHS-AGALMAYALATELLDR------L
GHPPRGVVLIDVYPP--DGHQD-------------AMNAWLEELIFD--R----------
---------TATLFDRET--------VRMDDDVDYTRLTALGAYDRL--TGQWRP-----
--------------PRETGLP---------------------------------------
-----------------------------------TLLVSAGEPMGPWP---DDS-----
--GE-----WKPTWPFEHDHTTVAVPGDHFTMVQ--EH--ADAIARHIDAWL--------
-

#OL56_STRAT/3304-3514
--QLICCSGTAPVGGPHEFARLASFFRGT---HRAVSALPLPGYL---LPGE----QLPA
DLDAVLAAQAEAVEKQTGGA--------PFVLVGYS-AGGLMAHALACHLAGR------G
TPRPSGEVLVDVYPP--DGRQE-------------PVFGWQKELIFD--R----------
---------TEGMFAQDF--------VPMDDDVDYTRLTALGTYDRL--MGEWRP-----
--------------PAPSGLP---------------------------------------
-----------------------------------TLLIRATEPMAEWTG---AID----
--GE-----WRASWEYDHTHTAVDMPGNHFTIMR--EH--AEDAARHIDVWL--------
-

#O30768_9ACTO/1642-1856
--RLYCCAGTAATSNPREYAHFADALRGR---HRDVTVLPLPGFG---DPAE----PLPA
SLDALLADRADALLEHCGGE--------PFALAGHS-AGANVAYALAAYLESR------G
SGRPAAVVLMDMYFP--DDDPG-------------AMGVWRDDLIFD--R----------
---------LRWSLERSP--------VPLAEDVDYHRLTAMAGYHRL--LLGSHP-----
--------------FTALRAP---------------------------------------
-----------------------------------VLLARASEPLREWSGDDGPDG----
--GE-----WRSRVPGVTSHTVTDVPGNHFTMLT--EY--AADTASAVHDWL--------
-

#O33958_STRFR/1605-1819
--LLVGCAGTAVASGPVEFTAFAGALADLPA-AAPMAALPQPGFL---LPGE----RVPA
TPEALFEAQAEALLRYAAGR--------PFVLLGHS-AGANMAHALTRHLEAN------G
GGRPAGLVLMDIYTP--DADPG-------------AMGVWRNDMIFD--R----------
---------FQWVWRRSD--------IPPDDDVDYHRLTAMGAYHRL--LLDWSP-----
--------------PTPVRAP---------------------------------------
-----------------------------------VLHLRAAEPMGDWP--PGDTG----
--GE-----WQSHWDGAHTHTTAGIPGNHFTMMT--EH--ASAAARLVHGWL--------
-

#FAS_HUMAN/2242-2501
--RPLFLVHPIEGSSTTVFHSLASRLSIP-TYGLQCTRAAPLDFL----E-------LPS
SIHSLAAYYIDCIRQVQPEG--------PYRVAGYS-YGACVAFEMCSQLQAQQS----P
APTHNSLFLFDGSPTYVDLAYTQSYRAKLTPGCEAEAASETEAICF--------------
------FVQQFTDMEHNR-VLEALLPLKQFVDGLEERVAAAVDLIIKS-FSGWSP-----
---HQGLDRQELSFAPDITTP---------------------------------------
----------------------------------ARSFYYKLRAAEQYTPKAKYHGNVML
LRAKTGGAYGEDLGADYNLSQVCDGKVSHFVHVIEGDHRTLLE-GSG--LESIISIIHSS
L

#FAS_CHICK/2243-2502
--RPLFLVHPIEGSSIAVFYTLASKLHMP-CYGLQCTKAAPLDFL----E-------LPS
SIQSLASYYIDCMKQIQPEG--------PYRIAGYS-FGACVAFEMCSQLQAQQN----A
SHALNSLFLFDGSHSFVDAAYTQSYRAKLTQGNEAALASETEALCA--------------
------FVQQFTGIEYNK-LLEILLPLEQFVDDLEARVNAAADLITQIHKNIWSP-----
--NREALSFAAASF-PDITTP---------------------------------------
-----------------------------------ALFYHKLKAADKYIPESKYHGNVTL
MRAKTHNEYEEGLGGDYRLSEVCDGKVSHFVHIIEGDHRTLLE-GDG--VESIIGIIHGS
L

#ACVS_CEPAC/3498-3711
--APLFLLPPGEGGAESYFHNIVKGLPNR-NLVVFNNHYREEKTL----E-------LLR
TIEALAEYYLSHIRSIQPEG--------PYHILGWS-FGGILGLEAAKRLTGE------L
GHKIATLALIDAYLPYFDDIPSASKAIGQPD----PVASALTSEIF--------------
------DACVLDPIYHV------YHPSPESFRTVSSLTNHIALFKATETNDGWSP-----
-----QHGNATQ---PDITTP---------------------------------------
-----------------------------------ALFLRGRQALYEWFATCPLNNLDKF
LAADT-----QMPPPWGVPIKVVPLEGNHFTHFTWVHHPEQVR--------SMCTMLDEW
L

#ACVS_EMENI/3553-3767
--PILFLLPPGEGGAESYFNNIVKHLPTT-NMVVFNNYYLHSKSL----E-------LLN
TFEKLAEMYLGHIRQIQPDG--------PYHFIGWS-FGGTIAMEISRQLVGL------L
GSTIGLLGIIDAYLTYFDNVPGATRAIGLG-----PVASALTSEIF--------------
------DTEVLDPIHHI------SQPEPADFQCLPASTDYIILFKATRVNDGWSP-----
-----KFQSENQ---PDITTP---------------------------------------
-----------------------------------ALFLRGRRRLYEYYDKTLLNDLDWL
LPGAS-----QMPPPWGVNIHLVRLEEDHFTHFSWATNPRQIA--------HVCSTIEKF
L

#ACVS1_PENCH/3529-3743
--PTLFLLPPGEGGAESYFNNIVKRLRQT-NMVVFNNYYLHSKRL----E-------LLR
TFEELAEMYLDQVRGIQPHG--------PYHFIGWS-FGGILAMEMSRRLVAS------L
DEKIGFLGIIDAYLTYFDNVRGATRTIGLG-----PVASALTSEIF--------------
------DTEILDPIHHI------YNPDPANFQRLPSATDRIVLFKAMRPNNGWSP-----
-----KYESENQ---PDITTP---------------------------------------
-----------------------------------ALFLRGRRRLYEYYDGTRLNGLDSL
LPSDS-----QMPPPWGDPVQLVPLTDDHFTHFSWVGNPQQVE--------QMCATIKEH
L

#P94873_LYSLA/3503-3716
--PTLFVLPPGEGGAESYLNNLAKQLPNL-RLVLFNNVHLHTPFL----E-------LMQ
SFEDIAQYYMAHVRRLQPRG--------AYNFFGWS-FGGVVSLEMSLQLLND------L
GESVSNLLMVDAYLSFFDNVEKTVDDLRLPK----PVASALTSEIF--------------
------HGNSLDPINHR------YKPNEQALEALAKSADNIVLFKAIEPIDGWSP-----
-----QHDSDEQ---PDITTP---------------------------------------
-----------------------------------ALFLRGRRKVFEYYASSPFNNLDTL
LPPSA-----QMPPPWGVPFTLEILGDNHFSHFSWIHEKTTVD--------KVCSTTASL
V

#ACVS_NOCLA/3433-3646
--RTLFVLPPGEGGAESYLSNLARQLPDL-RLVLFNNVHLHTPFL----E-------LMG
SFEELGRYYVEHIRRLQPSG--------PYHLLGWS-FGGVLSLEISRQLARA------L
GERIDDLLLIDAYLPYFDGMRQASANIGLPG----PVASALTSEIF--------------
------VEDILDPINYH------YRPDEADLARLAGRLGNLVLFKAGEPNDGWSP-----
-----VVNGPHQ---PDITTP---------------------------------------
-----------------------------------ALFLRGRPRLFEYYHGTRFNHLDLL
LPAAA-----QMPPPWGVPIEVCDLAGEHFTHHSWVRNEKLVR--------LMCERISTS
L

#PKSR_BACSU/2234-2511
--RPVFWFHGGVGSGVEIYQQFAQKSQRP---HRDFYGIQARGFM--------TDSAPLH
GIEQMASYYIEIIRSIQPEG--------PYDVGGYS-LGGMIAYEVTRQLQSQ-------
GLAVKSMVMIDSPYRSETKEN------------EASMKTSMLQTINTM-R----------
----------LASIAK-REKFTDVLISREEVDIS-LEDEEFLSELIDLAKERGLNKPDKQ
-------------IRAQAQQMMKTQRAYDLESYTVKP-----------------------
----------------LPDPETVKCYYFRNKSRSFFGDLDTYFTLSNEKEP---------
FDQAAYWEEWERQIPHFHLHTVDVDS-SNHFMILTEPKA--STALLEFCEKLY-------
-

#PKSL1_ASPPA/1866-2104
--KTLFMLPDGGGSSAFSYASLP-RLKSDT---RAVVGLNCPYARDP--------ENMNC
THGAMIESFCNEIRRRQPRG--------PYHLGGWS-SGGAFAYVVAEALVNQ-------
GEEVHSLIIIDAPIPQA----------------MEQLPRAFYEHCND--R----------
-------SIGLFATQPGA------SPDGSTE-----PPSYLIPHFTAVVDVMLDYKLAP-
-------------LHARRMPKV------------------GIVWAA--------------
----------------DTVMDERDAPKMK----------GMHFMIQKRTEF---------
--GE-GPDGWDTIMPGASFDIVRADG-ANHFTLMQ-------KEHVSIISDLI-------
-

#P79068_GLOLA/1938-2183
--KNLWMVPDGSGSCATSYTEIS-QVSSN---HWAVWGLFSPFMK--------TPEEYKC
GVYGMAAKFIEAMKARQSKG--------PYSLAGWS-AGGVIAYEIVNQLTKA-------
GETVENLIIIDAPCPVT----------------IEPLPRSLHAWFA--------------
-------SI-------------GLLGEGDDEAAKKTIPSWLLPHFAASVTALSNYTAEP-
-------------IPKEKCPP-----------------NVMAIWCE--------------
----------------DGVCHLPTDPRPDPYPTG-----HALFLLDNRTDF---------
--GE-GPNRWDEYLDVNKFHRTRHMP-GNHFSMMH-GDYVSQTTLSPYNDDNL-------
-

#PPSE_BACSU/1068-1273
--QNLFCFPPISGSFGIYFKDLALLLNEKAA-VYGFHFIEQDTRL----EGE------PS
GIGAVIEQYVNCMTDIQPEG--------PYVLLGYS-AGGNLAFEVAQAMERK------L
GLEVSDFIIVDAYLAYLDKEQP-------------LPIDTGNDEIFD--R----------
----------SAAYLPEAVR-----------DVDEKVMKKKRNYQEYWAQLLNEGHIKAS
--------------IHFIEAG---------------------------------------
----------------------------------IHPETSGHTGLTKWEG--ACGN----
--GE-----YSEYTGFGAHHTKDMLEGTYAEKNA--DI--ILDILEKITSNQ--------
-

#SRFAC_BACSU/1059-1271
--QIIFAFPPVLGSYGLMYQNLSSRLPSY-K-LCAFDFIEEEDRL----EGE------PS
GIGAVLDRYADLIQKLQPEG--------PLTLFGYS-AGCSLAFEAAKKLEEQ------L
GRIVQRIIMVD---SYKKQGIV-------------SDLDGRTVESDD--R----------
---------VEALMNVNRDN-----EALNSEAVKHGLKQKTHAFYSYYVNLISTG-----
--------------QVKADID---------------------------------------
---------------------------------LLTSGADFDMPEWLASWEEATTG----
--GE----VYRVKRGFGTHHTAEMLQGETLDRNA--------EILLEFLNTQT-------
-

#GRSB_BREBE/4207-4446
--RNVFLFAPIGASQGVFYKKLAEQIPTA-S-LYGFDFIEDDDRL----EGE------PS
GIGAVIQQYIESMIQTQSDG--------QYVLIGYS-SGGNLAFEVAKEMERQ------L
GYSVSDLVLFD--VYWKGDGKV-------------FEQTKEEEEENIKIIME--------
-----ELRENPGMFNMTREDFEL---YFANEFVKQSFTRKMRKYMSFYTQLVNYGEV---
-----------EATIHLIQAEFEEEK---------------------------IDEN---
------------------------------EKADEEEKTYLEEKWNEKAWNKAAKR----
--GE-----FVKYNGYGAHHTSNMLGGDGLERNS--------SILKQILQGT--------
-

#TYCC_BREPA/6254-6482
--RNVFCFTPIGVAQSVYYQKLAAEIQGV-S-LYSFDFIQDDNRL----EGE------PS
GIGAVMEQYIAAITAIDPSG--------PYTLMGYS-SGGNLAFEVAKELEER------L
GYGVTDIILFDAYLSYWDKDKA-------------IERTVAETENDIAQLFA--------
-----EIGENTEMFNMTQEDFQL---YAANEFVKQSFVRKTVSYVMFHNNLVNTGMT---
-----------TAAIHLIQSE---------------------------------------
------------------------------LEADEEAPLRVAAKWNESAWANATQR----
--GE-----LLTYSGHGIHHTSRMLAGDYASQNA--------SILQNILQEL--------
-

#Q51338_PSEAI/2170-2429
--SPLFMFHPSFGSSVHCYKTLAMALRDR----HPVKGVVCRALLGAG-EGE----REVP
EWDDMVAEYAEQLLQEHPEG--------VFNLAGWS-LGGNLAMDVAARLEQR------L
GRQVAFVGWIDAPAPVRVEAFW-------------N------------------------
-EIGPTPEAVP-----------NLSVGEMRVELLGVMFPERAEHIERAWSSICSATTDDE
------------QRWTRMSDWAEAEIG-----------AEFATLR---------------
SEIAQSN-------------------ELEVSWELKQILDERLKAMDYPRLTAKVS-----
---E---LWWAARSTNAIQHTRSAVERSMAEAIG-------AERVEPVRVLDTRHDKI--
-

#ENTF_ECOLI/1066-1287
--PTLFCFHPASGSFAWQFSVLSRYLDPQ---HWSIIGIQSPRPN--GPMQT------AA
NLDEVCEAHLATLLEQQPHG--------PYYLLGYS-LGGTLAQGIAARLRAR------L
GEQVAFLGLLDTWPPETQNWQE-------------K------------------------
------------EANGLDPE----------VDVDYTRLVVLAEINREREAFLAAQQGSTS
-----------TELFTTIEGNYADAVR------------LLTTAH---------------
SVPFDGK--------------------------ATLFVAERTLQEGMS----PER-----
--GE----AWSPWIAELDPH-IYRQDCAHVDIIS-------PGTFEKIGPII--------
-

#O07944_STRPR/4598-4838
--APLFCVHPAGGSFGWVYSALLRHTDRE---HQPLYALQARGLA-R-P-E-----PLPD
DIDAMARDYAEQIRKTVPEG--------PYEILGWS-FGGLVAHAVAARLQAE------L
GAEVSLLAVLDGYPD--DAYDG-------------TEHEVGEEQIFD--R---------V
LAILLNAAGVD-RAQAFGDA--------------PLQRAAVLEKLRDSGSALGNLDD---
------------DAVGRMVTVFLNN-------------TRLIQNF--------------R
PRRFTGD--------------------------MVFFAAAAGH--HDPALTP--------
-------GNWRPYVTGRIEHTEHHLDTDH-AGLAR-------------PEALGAVARTL-
-

#olmA7|gb|AB070940.1|_Actinobacteria_-_Streptomyces_avermitilis_Oligomycin_T1PKS_Thioesterase
--------------SNQELVSMATPLRG----TRDVWSLMLPGFVTGQ--------PVAA
DVDAAAEYALRLIEELVDGE--------PFVLAGRS-SGGRIAHEVTSRLEDR-------
GLAPRGLVLIDSYMAGYDATSY-------------IVPVMESKAVEL-------------
--------------------------EKDFGQMTGTRLTAMAAYFG--MFEHWQP-----
---------------KEIATP---------------------------------------
-----------------------------------TLLVRASECYG-------------I
EPGEVQPPAEQWQAAWPLPHEAIDVPGNHYTMLEGNGD----VTAAAVHEWL--------
-

#npsP5|gb|HQ287563.1|_Actinobacteria_-_Streptomyces_sp._DSM_5940_Napsamycin_NRPS_Thioesterase
---ALVCVPYEAG-NALNFEAMARALSAAD---VAVYAVELPGHDFARPDE------ELA
GVDRVAGPLTREILDRIE---------LPVALWGHG-AGVALALETARSLREA-------
GAPPRHLFLAAGIEREPTDGGPAGGGTAAAGSTDIGA-----------------------
--------WLRDAGALTDVDQSRSSRGELIERAYRHDLREAERYLGAFSG----------
------------------------------------------------------------
----------------------------TLDLPATIVAIP--------------------
----------------------AAPGEGEATARC--------------------------
-

#pacP|gb|HM855229.1|_Actinobacteria_-_Streptomyces_coeruleorubidus_Pacidamycin_NRPS_Thioesterase
---ALVCVPYEAG-NALNFEAMARALSASD---VAVYAVELPGHDVARPDD------ELV
GLDRIAGRLSQEIRDRIE---------IPVALWGHG-AGVALALETGRSLQAA-------
GVPPRHLFLAAAEQREATDREPA-----AAGSADVGA-----------------------
--------WLRDAGALTDVDQWRSTRGELIERAYLHDLGEAERY----------------
------------------------------------------------------------
------------------------------------------------------------
------------------------------------------------------------
-

#ambH|gb|DQ897667.1|_Proteobacteria_(Delta)_-_Sorangium_cellulosum_Ambruticin_T1PKS_Thioesterase
---RLVCFPASGG-SAGDFAEWAKVMPDD----CELVAVEYPGSGARQLES------CEH
PLAALTLQAAGALMAMPR---------VPLVLFGHS-LGGLIAHATAVELERH-------
AMGPSCVVLSNPANVITVQRDLP-------------------------------------
----------RDGFRDQKFLTWLARSTGISIEPEATDSDATRQFLKTFGEQLAWTFDFDL
G--------------WRVSCP---------------------------------------
----------------------------------VIISCGRDDTTLHAES----------
-------LEFWRRSGGDLEEWTFAGAHDYIRQEFA-------EIVSKIMTTT--------
-

#pedH|gb|AY328023.1|_Unknown_-_symbiont_bacterium_of_Paederus_fuscipes_Pederin_TRANSATPKS-NRPS_Thioesterase
---PWFCIHAAAG-NVLCYRELAECLGIE----RPFYALQAPDAVGGGHP---------G
SIVGLAALYVRAIRIFQP--WG------PYFLAGWS-MGGVVAYEMAQQLLQA-------
GEQVEVLALLESYTPEAIR----------------SLERKALGLS---------------
------AESDDRMDKLLRTFAVELGIGETPWELSAVDLAQGLEWILKRLEGSNLSTASFD
LEQLHKLFRLYEANLNALDRYRLQPYS-------------------------------GR
VVLIYADQTQ---------------------------QIDADEAQHLGG-----------
--------WQPWLRSGHCRSATIVGDHYSILQRPQ---------VVQLAKVLTAL-----
-

#epoE|gb|AF210843.1|_Proteobacteria_(Delta)_-_Sorangium_cellulosum_Epothilone_T1PKS-NRPS_Thioesterase
---RLFCFHGSGG-SPEGFRSWSE--KSEWS-DLEIVAMWHDRSLASEDAP------GKK
YVQEAASLIQHYADA-------------PFALVGFS-LGVRFVMGTAVELASRSG----A
PAPLAVFTLGGSLISSSEITPEMETDIIAK------------------------------
----LFFRNAAGFVRSTQQVQADARADKVITDTMVAPAPGDSKEPPVK------------
------------------------------------------------------------
-----------------------------IAVPIVAIAGSDDVIVPPSDVQD--------
-----------LQSRTTERFYMHLLPGDHEFLVDRGREIMHIVDSHL-------------
-

#MXAN_3932|gb|CP000113.1|_Proteobacteria_(Delta)_-_Myxococcus_xanthus_DK_1622_Antibiotic_TA_TRANSATPKS-NRPS-T2PKS_Thioesterase
---PIFWFHGGMG-GVEVYRALSQEIRRP------FLGIQARGWM--------SQEAPIA
GIEAMASYYVDILLAAQPEG--------PYELGGYS-LGGMLAYEVTRQLQER-------
GARVASIVMLDAPDSTHLDVF------------QFSRRTATFQAVNTA------------
---------LFSSIAHHPERLEQTLIHRDEVEAD-LDDTALLRQLMGLAQSRGLSKDENQ
-------------VRFMVEQNARVHAAYDVGRFRLKP-----------------------
----------------LLRPEEVAVFYLRNGSCSFFGNLEPYLTLTPGELT---------
FDGTNYWAEWERFLPRMQI--LEVAS-SNHLMLLAEPAV--QRVIAGFC-----------
-

#PA2399|gb|NC_002516.2|_Proteobacteria_(Gamma)_-_Pseudomonas_aeruginosa_PAO1_Pyoverdin_NRPS_Thioesterase
---PLFMFHPSFG-SVHCYKTLAMALRDR----HPVKGVVCRALLGAG--------REVP
EWDDMVAEYAEQLLQEHPEG--------VFNLAGWS-LGGNLAMDVAARLEQR-------
GRQVAFVGWIDAPAPVRVEAFW-------------N------------------------
-EIGPTPEAVP-----------NLSVGEMRVELLGVMFPERAEHIERAWSSICSATTDDE
------------QRWTRMSDWAEAEIG-----------AEFATLR---------------
SEIAQSN-------------------ELEVSWELKQILDERLKAMDYPRLTAKVS-----
-------LWWAARSTNAIQ--RSAVERSMAEAIG-------AERVEPVRVLDTRHDK---
-

#rhiF|gb|AM411073.1|_Proteobacteria_(Beta)_-_Burkholderia_rhizoxinica_Rhizoxin_TRANSATPKS-NRPS_Thioesterase
---PIFWFHGALG-GTEIYQELAHHIDRP------FFGLQAKGWM--------TEREPLQ
GIEAMAAYYVQAIQSVQPQG--------PYDLGGYS-LGGMLAYEVTRQLQES-------
GEAVTTLVMLDSPDVTGERTA------------KLADKTRLLQAVNMS------------
---------LQMTISDTPERFAEVLIHRDEIDLS-LSHQEYRQQLMTLARQRGLKISDDR
-------------LQQMMEQVARIQQSYQVEHYQILP-----------------------
----------------LPKAEEVACYYFRNASGLWMGDLEPYFSTDSQEFAA--------
FNHTNYWQEWQRQLPSFEM--IEVNS-SSHMTLLTEPEV--FDVIAEFC-----------
-

#dszC|gb|DQ013294.0|_Proteobacteria_(Delta)_-_Sorangium_cellulosum_Disorazole_TRANSATPKS-NRPS_Thioesterase
-----FWVHGAPG-LAQPLYPLSAALGTD----YPFFAFQARGVDGLAMPF--------T
SIEEIAAHYVACLRQRSP--RG------PYVVGGLS-SGGIIAFEMARQLLSQ-------
GERVSRLVMLDTYPAVAGLAQE-------------TPGDIDPILP---------------
------LLLMANSFISFDRD-GDTAIKPDDLAGLPPPMQLPRAVQLIKERSRTALSRDQI
YRMLNGNIAVYKHLDLACRKYQPGVLDA------------------------------VD
VLFFKAEKGFFG-----------------GANPLGLPILDVFSSYDYVTP----------
---------WRQWIRGGLQVVELPCAHVDLLEPPA---------LHQVVAHVREAL----
-

#ABK51302.1|gb|EF032014.0|_Proteobacteria_(Gamma)_-_Candidatus_Endobugula_sertula_Bryostatin_T2PKS-TRANSATPKS_Thioesterase
---NTFWIHGGSG-EVGVYMDIAKHLQTSDF-KM--IGIQARGFLMPN-------APPLN
NLVEMARYYSKMIVSVDPIG--------PYHIIGFS-MGGAITYEVGRQLQLA-------
GKTVNTLVMVEPPVCNDNQYAD---------LFNVSKRENFLANANFLLL----------
--------VTL---------------YLDRDFSE-KLNTGEINWDTYMIVEEDV------
------------------------------------------------------------
------------------------------------------------------------
------------------------------------------------------------
-

#sorB|gb|U24241.0|_Proteobacteria_(Delta)_-_Sorangium_cellulosum_Soraphen_T1PKS_Thioesterase
--QLICFPAFVVPSAPIQYARFASHLRD----RRDIWFIPHPGYRHKT--------PLTR
SLDELVSSHARTTLACARNS--------PFVLFGHS-SGGNIAHMVAEHLESI-------
GHGPAGVVLLDSYDY---ASPA-------------VEAGLKIFHVEQ-------------
--------------------------LQTWG-ASDAGLTAEAWYYEHIGLETWKP-----
---------------RQLAAP---------------------------------------
-----------------------------------TLHVRATEPMK-------------Q
FVGSEGAPAE-WRASWKLPHVAIDAPGDHATVVDHP------FLAQAVDDWL--------
-

#nysK|gb|AF263912.0|_Actinobacteria_-_Streptomyces_noursei_ATCC_11455_Nystatin_T1PKS_Thioesterase
---LIFVSAPGATGGVHQYARIAAHFRG----SRHVSALPLMGFA----PGE----LLPA
TSEAAARIVAESVLMASEGE--------PFVMVGHS-TGGSLAYLAAGVLEDT------W
DVRPEAVVLLDTASIRYNPGEG-------------NDLDRTTRFYLADI-----------
--------------------------DSPSVTLNSARMSAMAHWFMA--MTDIQA-----
---------------PAPTAP---------------------------------------
-----------------------------------TLLVRAA-----RALDG--FRLDTS
SVPAD---------------EVRDIDADHLSLAKEHSA----LTAQAIEGWL--------
-

#cndF|gb|AM988861.1|_Proteobacteria_(Delta)_-_Chondromyces_crocatus_Chondrochlorens_T1PKS-NRPS_Thioesterase
---PFFCVHPVSG-SVVCYVDLARRLGQD----RPFYGLQSPGLQGERAPS--------D
DVHEMATLYLEAVREQQP--RG------PYLLGGWS-MGGCIAFEMARRLQEE-------
GETVALLALIDSHAITSID----------------LPDGIDDTTL---------------
------VSLLLFDLARQ----AGIALPSWDDDLAHAEPSERPAFLLDRARHAGLLPADLD
QASLDQMLQVFRANLVAHCRYAPRPAP-------------------------------LR
ATLLCGNDPR---------------------------GWSTGSPDLGWT-----------
-----------ELALGGLTLDVLPGDHYSLLTAQG----------DLLASRLRARL----
-

#spiJ|gb|AM407731.1|_Proteobacteria_(Delta)_-_Sorangium_cellulosum_Spirangien_T1PKS_Thioesterase
--GLVCLPSFYPPVS--VYTRFAAALRG----ERDVWLLPPPGYA----RGE----HLAP
DMPALIEHQAAAIVRSTAGS--------PFAIVAYS-SSGWLAYATASCLESK-------
GSSPRALVLLD------HVDQS-------------IPRELGHQIWR-EWVDF--------
----------------------------PVPARDDVEMSALGHYVKL--PQAETP-----
---------------AQIAAP---------------------------------------
-----------------------------------ILLVRPATLSATDVWP---------
--------PHWRAP-----EAVVEVPGSHSTMLVTHAE----STARAVHEWL--------
-

#AAS98787.1|gb|AY522504.1|_Cyanobacteria_-_Lyngbya_majuscula_Jamaicamide_T1PKS-T2PKS-NRPS_Thioesterase
---PIFLLHAVGG-TVYMYRDLARYLGSD----IPVYGIQSSVLDGKTELP--------T
SIEEMATEYIKAIRTIQP--NG------AYFLGGAS-LGGTVAFEMAQQLHAE-------
GEKVALLAMIDTPGPGNM----------------------GVKLV---------------
------DEQEIAAYILNTLFELDKSLFSFNSFPQVGNIEEQVMSALEQAKIANLLPNNFQ
IPQTRQIIRLFKANMEAMWNYKP-RIYP------------------------------GK
IIFFRAQ------------------------------DRREKYDPIHPEY----------
--------PWIELAASGIEIHPVSATHVTMNYDPH---------VQVIAEKLK-------
-

#mcyC|gb|AF183408.1|_Cyanobacteria_-_Microcystis_aeruginosa_PCC_7806_Microcystin_T1PKS-NRPS_Thioesterase
---AVFLFPPALG-FAAAYANLAEYITDY-A-LYTFRYISDELM----------------
-----LEKYAELIEDLAQDQ--------DIKLMGHS-AGGFLAMLMAQQLESR-------
GRVVSDVILLD---TYRGGREA-------------KKADMSEIQEG--------------
----------VDAFLLNPKRQELRGYFLGNQKLRDRTYHQVWEYFNFLWNSDLKN-----
---------------VQIQGT---------------------------------------
----------------------------------IHLIRAEGNYEARDDWTQATKGE---
---------RINHYATGIH--REMID----------------------------------
-

#amphK|gb|AF357202.1|_Actinobacteria_-_Streptomyces_nodosus_Amphotericin_T1PKS_Thioesterase
---LIFVSAPGATGGVHQYARIAAHFRG----KRHVSAIPLMGFA----PGE----LLPA
TSEAAARIVAESVLMASDGE--------PFVMVGHS-TGGSLAYLAAGVLEDT------W
GVKPEAVVLLDTASIRYNPSEG-------------NNLDQTTRFYLADI-----------
--------------------------DSPSVTLNSARMSAMAHWFMA--MTDIDA-----
---------------PATTAP---------------------------------------
-----------------------------------TLLLRAT-----QANNG--FMLDTS
AVPAD---------------VVRDIEADHLSLAMEHSD----LTAEAIENWL--------
-

#ADA82585.1|gb|FJ823461.1|_Unknown_-_uncultured_bacterium_psy1_Psymberin_TRANSATPKS-NRPS-T2PKS_Thioesterase
---RLYCFPYGNQ-SGAMYRNWVRAFPQA----IEVQPIELPGRGSRLKERP------FE
SIQRLVETLTKVLDEELER---------PFAVFGHS-IGALIGYAWCLHLAKS-------
GRALPQHLIVSAYTCPTMENPM--------------------------------------
---------LADMKLAYREACGLQTLPSVDDIAAPANEALVSRLVSVAQAGIVNMGLGDR
---------FASATPELIRTQLVNG-----------------------------------
-------------------------------IATLQLVDGFDAASAVPLVVPLTALHG--
--------ERDEQVSSEEMSAWGALTTGAFACKAFPGNHVFVDPSQCEADVMHEIIRLL-
-

#lkmAIII|gb|AB088224.2|_Actinobacteria_-_Streptomyces_rochei_Lankamycin_T1PKS_Thioesterase
---LICVAGTAPVAGPHEFLRLAAAFEG----SMPVSALPQPGYE----PGE----QLPA
SLAAVLGVQADAVLKSADG---------PFVLVGHS-AGALMAHALGAELADR-------
GRPPHGIVLIDVYPP---GRQQ-------------AVQGWLAEL----------------
---------TDTMFGREG--------VRVDD----TRLTALGAYHRF--TSTWQ------
--------------PRDLAVP---------------------------------------
-----------------------------------TLLVRACEPLGEWP---DGTS----
---------WQSTWPFPHT--CVDVPGNHFSMVQ--EH--AGAVAERIRTWT--------
-

#vlm2|gb|DQ174261.1|_Actinobacteria_-_Streptomyces_tsusimaensis_Valinomycin_NRPS_Thioesterase
----IVFAPPAGG-TVLGYIELARHLKGFG----EIHGVEAPGLGAGETP-------VYP
SFEEMVQFCSDSAAGVAGDG---------VYIGGHS-LGGHIAFYLATMLLDR-------
GIRPKGLIILDTPPRLGDIPVAD-------------------------------------
-----ADLTEEETKVFILAMGIGGMLDQDRDALKDLPYEEAKQLLLDRAKNDPRVSAFLS
EDYLDRFLRLQMHQLMYSRDVVLPQRKLDIP-----------------------------
---------------------------------IHVFRTKNHAPEVARLFS---------
--------AWENYAAGEVTFVDIPGDHATMLRAPH---------VSEVAQLLDRHC----
-

#eryAIII|gb|AY623658.0|_Actinobacteria_-_Aeromicrobium_erythreum_Erythromycin_T1PKS_Thioesterase
---LVCCAGTAAPSGPHEFARLAAALDG----SWSVLGLPQPGYL----AGE----PLPA
SMEALAAAQAATVLRAVAAR--------PVVLVGHS-AGGLMSHALATALTQQ-------
GHRPDGVVLLDSYPP---GRQD-------------AVEGWIDVL----------------
---------TRRLLDLET--------VPLDD----TRLTAMGAYDRM--LGGWV------
--------------PDDQQVA---------------------------------------
-----------------------------------TLLVRAVDPIAAWP---DDD-----
---------WRASWPFAHA--TADVPGDHFTMMQ--EH--AGQVAARITDWW--------
-

#aurC|gb|AJ575648.0|_Actinobacteria_-_Streptomyces_thioluteus_Aureothin_T1PKS_Thioesterase
--KLICFPTFAGGSGAHQYARLAAVSGG----ERDIWVLPAPGFT----WQE----SLPA
SVETLARLQADSVEACADGG--------PVVLLGYS-AGGWIAQATATALQE-------R
GIAPAAVVLLDSHRPD-SAMLP-------------HLHAHIDGAREDV-L----------
--------------------------WTAGTG-DDAYLTAMAHYAHL--FHTWTP-----
---------------KETGTP---------------------------------------
-----------------------------------TLLVRASDRP-------FDE-----
-APT------DWQPHWPLPHTAVDTAGTHFSIIREHSG----PTLQAVHAWL--------
-

#nidA5|gb|AF016585.0|_Actinobacteria_-_Streptomyces_caelestis_Niddamycin_T1PKS_Thioesterase
---LYCCAGTAATSNPREYAHFADALRGR----RDVTVLPLPGFG---DPAE----PLPA
SLDALLADRADALLEHCGGE--------PFALAGHS-AGANVAYALAAYLESR------G
SG-PAAVVLMDMYFP---DDPG-------------AMGVWRDDL----------------
---------LRWSLERSP--------VPLAE----HRLTAMAGYHRL--LLGSH------
--------------FTALRAP---------------------------------------
-----------------------------------VLLARASEPLREWSGDDGPDG----
---------WRSRVPGVTS--VTDVPGNHFTMLT--EY--AADTASAVHDWL--------
-

#AAZ94391.1|gb|DQ149987.0|_Actinobacteria_-_Streptomyces_neyagawaensis_Concanamycin_A_T1PKS_Thioesterase
--ELVCFASVVALGGAHQYSRLASAFEG----RYGVSALDAPGFA----PDE----PLPA
DMSSLLDFQTEVLLRRLGDR--------PKVLLGSS-SGGTLAHAAAARLEA-------L
GAGPAAVVLLDTYLSGDE-AMT-------------QFDDVLVSGMFERE-----------
---------------------------DRAAPMDGTRLTAMGRYFQL--LDDWVP-----
---------------PPVEAP---------------------------------------
-----------------------------------VLLVRASSPL-------A-EPA--P
DSDI------DWRASWPSAHSVLDVPGNHWSMMEQHLK----TTVDAVSGWL--------
-

#crpD|gb|EF159954.0|_Cyanobacteria_-_Nostoc_sp._ATCC_53789_Cryptophycin_T1PKS-NRPS_Thioesterase
---PLFCVPGAGG-NVLYFHHLAQYLGNN----QPLYGLQAQGLDGETEPH--------K
SVEEIASQHIKAIQTVQP--VG------PYFLAGHS-FGSHVVFEMANQLQLI-------
GKSVAYVGILDTPAPTSQANHQ-------------NDFSN--WDN---------------
------AKWICRMAEVIEDIVGENLFLSYETLTSLTW-EQQLNYFKQKLEIVGFLPAQTD
IKIVRGLLQVFQTQ--CQIKYEPEKTYK------------------------------TP
ITLFCAREINP-------------------------EQESYSHIFQEPTW----------
--------GWNQFSDGEVEIHIVPGNHVSMLSEPH---------VKVLAQQMQI------
-

#fscF|gb|AY310323.0|_Actinobacteria_-_Streptomyces_sp._FR-008_FR-008_T1PKS-NRPS_Thioesterase
--RLVCVSAPTANGGVHQYATLSGHFRG----RRDVTALPLIGFN----TGE----ALPA
HAEAAARIIADCTLQAADGK--------PFVLVGHS-SGGSLAYAAAGVLEHT------W
GIRPEAVVLLDTLSIQHKSDEG-------------VDYNGMMKFNFTAV-----------
--------------------------DDSPVRLTNSRLSAMGRWMVL--LNALDV-----
---------------HPTTVP---------------------------------------
------------------------------------------------------------
------------------------------------------------------------
-

#mtaG|gb|AF188287.1|_Proteobacteria_(Delta)_-_Stigmatella_aurantiaca_DW4/3-1_Myxothiazol_T1PKS-NRPS_Thioesterase
---PLFFMHPTGG-DVLCYAPLARQLGPR----QPFYALQA---VVDQEA---------E
SIEAMAARYLEEVRKVRP--KG------PYRLGGWS-TGGILAQAMARQLEEA-------
GEQVELLMLLETWSPTVYQ----------------RSEGTTALMA---------------
------WFATDLLGGAG-------AAQLEASKLETLDEAAQLDYLFERASASGALPG-VE
RSEMEQRFRIFAKTARALSRYQSDAYR-------------------------------GK
VLFLQAEEAA---------------------------TPTAGTLPEPQAS----------
--------WGQSLEQ--VQMYRMPGNHYTMLQSPH---------VRAVADRM--------
-

#herD|gb|JN671974.1|_Actinobacteria_-_Streptomyces_chromofuscus_Herboxidiene_T1PKS-T3PKS_Thioesterase
--GLFCFPSFLAIAGPQQYARFAAAFRG----VREVTVLPEPGFT----DGG----PLPA
DVGALVALHAETVRRHAGPT--------PYALLGHS-SGAMIAYAVAARLEE-------L
GAPPRAVVLLD-VVPTDVHALP-------------GFQSDLAAGLRERDG----------
---------------------------DAASLD-DQRLTAMGGYVRA--FATWEP-----
---------------AEISVP---------------------------------------
-----------------------------------TLLVRAG------------------
--EN------HWSSAWPHPHTAVDAPGDHFTMLEAHAG----ETARLVQEWL--------
-

#ADC79620.1|gb|GU390405.1|_Actinobacteria_-_Streptomyces_lohii_Bafilomycin_T1PKS_Thioesterase
--VLVCFGSVVALGGAHQYARFAARFRD----RYAVAALDAPGFT----PEE----ELPA
DMAALLDFQATTLLRELPGR--------RLVLAGSS-SGGTLAHGVAAALEQ-------R
GEGPAAVVLLDTYLSDNQ-GIT-------------QFNDVLLGGMFARE-----------
---------------------------DRAAPMDGTRLTAMGGYFRL--LDDWTP-----
---------------PAVRAP---------------------------------------
-----------------------------------LLLVRASTPL-------G-SPS--A
EAG-------DWRSSWAGADTVLDVPGDHFSIMEEHVA----TTGDAVADWL--------
-

#borA6|gb|AJ580915.1|_Actinobacteria_-_Streptomyces_parvulus_Borrelidin_T1PKS_Thioesterase
--PLFCIPSHLGKADPHKFLRFAAALRG----RRDVFVLRQPGFV----PGQ----PLPA
GLDVLLDTHARAMAGHDRP-----------VLLGYS-AGGLAAQALAARLAE-------L
GRPPAAVVLVDTYAPDETEVMA-------------RIQGAMEQGQRDRDG----------
--------------------------RTGAAFG-EAWLTAMGHYFG----FDWTP-----
---------------CPVDVP---------------------------------------
-----------------------------------VLHVRAGD------------PMTGM
PVEG------RWQARWNLPHTAVDVPGDHFTMMEDHAP----RTADTVHDWL--------
-

#jerE|gb|DQ897668.0|_Proteobacteria_(Delta)_-_Sorangium_cellulosum_Jerangolid_T1PKS_Thioesterase
---RLFCLPYAGA-GASRFRAWPELLPSW----VEVCPIQLPGREERLHEP------AFE
TMDALVDALVPAVEAHIDR---------PFALFGCS-MGALLAFELARALQSR------H
RLVARHLFGAASSSPRRVSPVREQLSAVVSPGTVR-------------------------
---SDAMASLRQLGLLSSSSLQDEEMLDEVWPAFRADLSLTLKYTCRDAT----------
------------------------------------------------------------
----------------------------PLDAPISVFGGTEDRTVGREDLVA--------
---------WHTLTKDAFQ--VAMLPGGHLFMDATPKRLFHHIEHAL-------------
-

#pldAIV|gb|AB435553.1|_Actinobacteria_-_Streptomyces_platensis_Pladienolide_T1PKS_Thioesterase
--TLLCFSAIVALAGSHQYSRFASSFRE----ERDVSVLYAPGFF----AGE----LLPT
SLETVIDTQVETVRQQAADG--------PVVLVGAS-SGGWLAHAAAARLEA-------L
GTPPAAVVLLDTYLPDDQ-FLA-------------RDQDRFIGGVFDRQ-----------
---------------------------DRFSIREDVSLSAMGWYLHL--FDGWKP-----
---------------TAISVP---------------------------------------
-----------------------------------ELLVRASEPL-------P-SPSGRP
PRAA------DWRTSWHVAQHSVEVPGDHFTMLEEFND----ATADAVRRWL--------
-

#PSPTO_4687|gb|NC_004578.1|_Proteobacteria_(Gamma)_-_Pseudomonas_syringae_pv._tomato_str._DC3000_Coronatine_T1PKS-NRPS_Thioesterase
----------LPARANLTYQRLGRELKG----HYDMATLPLPGYD----NG-----PLPA
SAEAVAVALAHAVEACAAGR--------PFTLLGFS-TGGLVAYAVAELLQQR-------
GIHPAALCLIDTYPPAAMRSAV-------------LKEVLSDWLESR-------------
---------------------------SDFWSTDDDGLSAMAYYLEL--FGRWSP-----
---------------LPLEAP---------------------------------------
-----------------------------------VLLLQAEQASAAGAS----------
---------DTWPQLWPRLTQVVKTSGRHFALLSDEVQ----QTAQHLIL----------
-

#PSPTO_4699|gb|NC_004578.1|_Proteobacteria_(Gamma)_-_Pseudomonas_syringae_pv._tomato_str._DC3000_Coronatine_T1PKS-NRPS_Thioesterase
---PLFLIHEGSG-DIGYAQQLAKQISSD----IPVYGFSASGLQIGEE--------HLT
TIEAMASRYIQGIRHIQPDG--------PYRVAGWS-AGGTIAYEIAHQLIGA-------
GATVEFLGLIDTTS----------------------------------------------
------------------------------------DYRHLFN-----------------
------------------AQEVEH---------------AHP----------------YE
TPEIEAL--------------------------LRLLSPD--ARHGAVSHLAAARD----
---------FEALLAYTQVQG-LLPEGIDSDLAKR-----------------YLAL----
-

#AAK81827.1|gb|AF386507.1|_Actinobacteria_-_Streptomyces_lavendulae_Complestatin_NRPS_Thioesterase
---PLFCLHPSMG-LSWSYAALVPYLPAD----LPVYGVQARGLAGPEE--------LPH
SIEEMAADYTDEIRTVQPEG--------PYHLLGWS-FGGMIAQAIACRLEEL-------
GEEVALLALLDAYPSSAG------------------------------------------
-------------KSISR--------------DRGVSREEQASTLMEQEIEVSAGVDARG
--------NLGDRVLSRMQEVLGNM-------------ARFAPGH--------------T
PRRFGGD--------------------------VLLFIAAHDR--PEELPAA--------
----EARAGWDDFTGGTVES--HEIPVDH-YRMLH------PGNLPPVGRV---------
-

#teiD|gb|AJ632270.1|_Actinobacteria_-_Actinoplanes_teichomyceticus_Teicoplanin_NRPS_Thioesterase
---PLFCIHASGG-LSWNYGPLLRHLPPN----QPVYGVQARGLARTEP--------LPG
SVEEMAADYVEQIRTVQPTG--------PYHLLGWS-LGGRIAQAMAVLLEAD-------
GEKVGLLALLDAYPVYMG------------------------------------------
-------------RKATGTVT-----------EEAARDEDALERRKQQELELAGQLVQ--
----------GAGARSRLEAVMRNL-------------WEVGPAH--------------T
ASPFASD--------------------------VLLFVASVDR--PAHLPVS--------
----EAIASWKD-----FTG--GTIATNH-YEMVQ------PAALAQIGAIVAEK-----
-

#vcm4|gb|HQ679900.1|_Actinobacteria_-_Amycolatopsis_orientalis_HCCB10007_Vancomycin_NRPS-T3PKS_Thioesterase
---PLFCVHASGG-LSWNYEPLLRHLPSN----QPVYGVQARGLARTEP--------LPG
SVEEMAADYLAQIRAVQPEG--------PYHLLGWS-LGGRIAQAMAKLLEEE-------
GEKVGLLALLDAYPVYMG------------------------------------------
-------------RKTTG----------------AASEEEALSKRNQADLDLAGQLVK--
----------GEAARARLEAVMRNL-------------WDVGPRH--------------V
SSPFAGD--------------------------ILLFVATVDR--PEHLPVS--------
----VAKASWKDFTSGTIET--HDVPSNH-YDMVQ------TAALGQIGAIVAE------
-

#pikAIV|gb|AF079138.1|_Actinobacteria_-_Streptomyces_venezuelae_Methymycin_T1PKS_Thioesterase
-----GCTGTAANGGPHEFLRLSTSFQE----ERDFLAVPLPGYGT--GTGTG-TALLPA
DLDTALDAQARAILRAAGDA--------PVVLLGHS-GGALLAHELAFRLERAHG-----
-APPAGIVLVDPYPP---GHQE-------------PIEVWSRQLG---------------
----------EGLF--AGELE------PMSD----ARLLAMGRY-AR--FLAGP------
-------------RPGRSSAP---------------------------------------
-----------------------------------VLLVRASEPLGDWQ---EERG----
--------DWRAHWDLPHT--VADVPGDHFTMMR--DH--APAVAEAVLSWL--------
-

#plm7|gb|AY354515.1|_Actinobacteria_-_Streptomyces_sp._HK803_Phoslactomycin_T1PKS_Thioesterase
----ISFPPFAPVEQTLQFVRLASFFRD----RRDLSMVTVPGFL----KGE----PLAE
SVDVLIDVLAESAIHCAAGS--------PFALLGYS-SSGWLAHCVTARMEA-------L
GTPAQGLVLLDTYLP--DGMSV-------------ALRQAMTYEVNE--R----------
--------------------------RSRFTKLNFTTITALGTYRRM--FRGWAP-----
---------------QPVSTP---------------------------------------
-----------------------------------TLFIRPEECI-------PGDPGLP-
PLTG------EWRTHWPLPHTDATVPGDHCTIVAENAD----ATAALVHDWL--------
-

#pimS4|gb|AJ278573.1|_Actinobacteria_-_Streptomyces_natalensis_Pimaricin_T1PKS-NRPS_Thioesterase
--RLICVSTPTANGGVHEYARLAASFRG----ERHVSALPLVGFA----TGE----RLPA
TAETAVRVIAESALRASDGN--------PFVLVGHS-SAGAFAYLAAALLENT------W
GIRPEAVVLLDTLSLRHEQNES-------------IDYAGLMRRHFMVD-----------
--------------------------EVSPVRMTNSRLSAMARWMGM--LNQLEV-----
---------------RHTTVP---------------------------------------
-----------------------------------VLIIRAT-----KETFG--IGTDTG
IYGEDH---------GS-PVDVRSVDADHFSMVRDDAP----ETARIVREWL--------
-

#simC1C|gb|AF324838.2|_Actinobacteria_-_Streptomyces_antibioticus_Simocyclinone_T1PKS-T2PKS-AMINOCOUMARIN-NRPS_Thioesterase
---LVCTVAPVAPLTDAAYSFLASALPE----PRDVWTVRPPGFG----EGE----PLPA
TLTDLFEAQRRALVEQLDGD--------AIVVVGYS-SGGWLAHGLAAHLEAA-------
GRPAAAVVLFDVYLPVSQLDTV-------------WTRFLQEQASRSGTLSG--------
----------------------------GRSATLSNELSAMGGYHGL--FDGWRP-----
---------------GRISAP---------------------------------------
-----------------------------------TLHIRASEALPGLSLP---------
--------APDAMFPPELCHSSASLPGNHFTMLSQHSE----AAAKTVNDWL--------
-

#pks2|gb|FJ952082.1|_Actinobacteria_-_Streptomyces_nanchangensis_Meilingmycin_T1PKS_Thioesterase
--ALVCVTSAVGTSDPVQYARLAKPFQG----ERDVWALRQPGFHR--GD------QLPR
TPETLLETHAASLRAELGER--------PFVLAGLS-SGGLIAHMLARYLYDQG------
-APPAGVILLDSYAP---GEDE-------------RLALLAPGLR---------------
----------GELQHRADDPD--SAAVPSDD----SWVTAMLHYETF--DWPFT------
----------------ELPAP---------------------------------------
-----------------------------------VLFVRAGEPLESWP-----------
-----ADWDWQPVWPYDHT--AVITRGNHFTMLE--EH--APHTAALMRDWM--------
-

#meiA4|gb|FJ952082.1|_Actinobacteria_-_Streptomyces_nanchangensis_Meilingmycin_T1PKS_Thioesterase
--VLICLPTVAAISSAYQYSRFASALQG----LRDVWYAPAPGFL----VGE----LLPA
DVDAVTHLFAEAVLRFTEGA--------PFALAGHS-AGGWLTYSVTSHLES-------L
GVRPEAVVAMDAYLP--DEGIA-------------PVASALTSEIFD--R----------
--------------------------VTEFVEVDYTRLTAMGGYFRI--FSGWTP-----
---------------PQIDTP---------------------------------------
-----------------------------------ALFIRGRD-----------------
--GE------QSPPVWGVPHTVMDVAGDHFTMLEEHAG----ATARHVDQWL--------
-

#zmaQ|gb|FJ430564.1|_Firmicutes_-_Bacillus_cereus_Zwittermicin_T1PKS-NRPS_Thioesterase
---QWFIVHGQGG-GILNYYDLARELGED----KTVYGLQSIGYDDSRFPN--------L
SVEEMAVRYIEEIKQVKKEG--------PYTLLGWS-FGGIVAFEMAKKLEEL-------
GDKVSFLGLLDVHPIEQGKEILS-------------------------------------
--------LNIKNAFEELEKFNDQLGIEKISFEQMSEEQLIESLLKKFKLNENSCQQNFE
DPMMNKLKVMIANRYAYLKYNCKQKIKAD-------------------------------
---------------------------------IFLFNASINDIHPLVDYN---------
----------RWNEYTSGEVYALQVPGSHLSMLEKP-------HIHELVKSIKKSF----
-

#ttmH|gb|EF990140.1|_Actinobacteria_-_Streptomyces_spiroverticillatus_Tautomycin_T1PKS_Thioesterase
--HLICVCPTVMTTGPQVYLRFAAELTG--R-GNQVSALVPPGFAA----GE----LLPA
TRAALVTGLADTVEEFVGET--------EFSLAGHS-SGGVVAYELAQELHAR-------
GLAPAGLVLLDTYTLNLKGERG-------------VFDDEALQHALNTRLVEYVR-----
---------------------------RMGFGTLSERITAQLWNLDL--LRGWRP-----
---------------EGISVP---------------------------------------
-----------------------------------SLYIRSTQALAHGQGD---------
---------EWRDEVAAAADSVVEVPGDHFTMLEPEQVS---STARAVGEWL--------
-

#chmGV|gb|AY509120.1|_Actinobacteria_-_Streptomyces_bikiniensis_Chalcomycin_T1PKS_Thioesterase
---LICCAGTAVASGPEEFTALAAALGDR----LTVSALRQPGFR----ANE----LLPG
SLDGLLDAQADAVLRHTGDR--------PYALLGHS-AGGALAHALACRLEELG------
-AGPAALVLADVYLP---SSPG-------------AMGVWRNEM----------------
---------LDWVMRRSV--------VSIDD----ARLTAMGAYNQM--LLEWT------
--------------PRPTKAP---------------------------------------
-----------------------------------VLFLRATEPVRPWSGEP--------
-------ESWRAHWDGGDHT-AVDVPGTHLTLMT--EH--ARHLAATLHTWL--------
-

#albIX|gb|AJ586576.1|_Proteobacteria_(Gamma)_-_Xanthomonas_albilineans_Albicidin_NRPS-TRANSATPKS_Thioesterase
---AVYAIHPIGG-QIHCYIDLAAALGHS----ARVYGLQCEPVRR------------FA
HLSDLAAHYCDALLAGPTGA--------PYRLLGWS-SGGVLALAVAEQLQRR-------
GLRVDYVGLLDSSLIPVHAREP--------------------------------------
-----------------------------RQLTFVAALNTLAALAKRGFEQAEIDEAR--
------------------------------------------------------------
----------------------------------QLLFADGDDE----------------
---------HVFDYSRHQASLDKLLAHLRFTLESR-------------------------
-

#srfA3|gb|X70356.1|_Firmicutes_-_Bacillus_subtilis_Surfactin_NRPS_Thioesterase
---IIFAFPPVLG-YGLMYQNLSSRLPSY-K-LCAFDFIEEEDR----------------
-----LDRYADLIQKLQPEG--------PLTLFGYS-AGCSLAFEAAKKLEEQ-------
GRIVQRIIMVD---SYKKQG-V-------------SDLDGRTVESD--------------
---------VEALMNVNRDN-----EALNSEAVKHGLKQKTHAFYSYYVNLISTG-----
--------------QVKADID---------------------------------------
---------------------------------LLTSGADFDMPEWLASWEEATTG----
--------VYRVKRGFGTH--AEMLQGETLDRNA--------EILLEFLN----------
-

#disC|gb|AJ874112.1|_Proteobacteria_(Delta)_-_Sorangium_cellulosum_Disorazole_TRANSATPKS-NRPS_Thioesterase
-----FWVHGAPG-LAQPLYPLSAALGTD----YPFFAFQARGVDGLAMPF--------T
SIEEIAAHYVACLRQRSP--RG------PYVVGGLS-SGGIIAFEMARQLLSQ-------
GERVSRLVMLDTYPAVAGLAQE-------------TPGDIDPILP---------------
------LLLMANSFISFDRD-GDTAIKPDDLAGLPPPMQLPRAVQLIKERSRTALSRDQI
YRMLNGNIAVYKHLDLACRKYQPGVLDA------------------------------VD
VLFFKAEKGFFG-----------------GANPLGLPILDVFSSYDYVTP----------
---------WRQWIRGGLQVVELPCAHVDLLEPPA---------LHQVVAHVREAL----
-

#apoS8|gb|JF819834.1|_Actinobacteria_-_Nocardiopsis_sp._FU40_Apoptolidin_T1PKS_Thioesterase
---VVCFASPMAEQSPYQYTRFAGALRR----LRDVSVLLSPGFV----AEE----LLPA
TLDDVVEAQADAVLRAASDA--------PVVLVGHS-SGGWFAQAVASRLES-------I
GNGPAAVVLVDTILPR-HEVVR-------------SIRSVWADNQLE--R----------
--------------------------EQQAGQYDHVQLTSMAAYTDL--FLEWRP-----
---------------EKISAP---------------------------------------
-----------------------------------TLFVRALTPP-------VPGETEA-
-ETE------ALRTSWELEHTAADAPGDHWSMMDEFAG----ATAQVVEEWL--------
-

#dptD|gb|AY787762.1|_Actinobacteria_-_Streptomyces_roseosporus_NRRL_11379_Daptomycin_NRPS_Thioesterase
---PLFCVHAGMG-LSWAYAGLLSHLDAD----VPVYGLQARRLT--------APGGLPG
SVEEMAEDYAGEIRRLCPDG--------PYRLLGWS-FGGTVAHAVATRLQQQ-------
GHTVELLAVLDAYPVTGARPDA-------------EVDEQRIVAD---------------
---YLAQLGSPVAPERLEGD---------------AWLPEFLEFVRRTDGPARDFDAG--
-------------RILAMKDVFLNN-------------ARLTRR--------------FT
PGVFTGD--------------------------MVFFASARPGSEQA--AER--------
------VGLWHPHVTGDLDLH--LIDCAH-EEMTD------PAALTRIGPV---------
-

#psm3B|gb|AB279593.1|_Cyanobacteria_-_Microcystis_aeruginosa_Micropeptin_NRPS-T1PKS_Thioesterase
---PLFCPHPIGG-NVLGYIALGRYLSPD----QPFYALEAPGLDGKQAPY--------T
RIPDLAAYYIKAIQTIKP--IG------PYFLGGHS-FGGLVALEMAQQLQKQ-------
GHEIAFLVLMDTPAPIRGN-------------------KTEVIDD---------------
------ATWLVKRAKVLERFFGIKIGVNEIEINSLTP-QAQFSYFLAKLRQANLIPPDAG
ENMIHSLLAVQKASHQALIDYVP-SIYQ------------------------------GK
ITLLRATDRLI-----------------------EDAQGVYADCFCKSDL----------
--------GWCELTTEPVEQYNVPGDHITMLTEPY---------VKALASQLKTII----
-

#spnE|gb|AY007564.1|_Actinobacteria_-_Saccharopolyspora_spinosa_Spinosad_T1PKS_Thioesterase
--ALVCMPALIGMPPAQQYARIAAGFRD----VRDVSVIPMPGFI----AGE----PLPS
AIEVAVRTQAEAVLQEFAGG--------SFVLVGHS-SGGWLAHEVAGELER-------R
GVVPAGVVLLDTYIP--GEITP-------------RFSVAMAHRTYE--K----------
--------------------------LATFTDMQDVGITAMGGYFRM--FTEWTP-----
---------------TPIGAP---------------------------------------
-----------------------------------TLFVRTEDCV-------ADPEGRP-
WTDD------SWRPGWTLADATVQVPGDHFSMMDEHAG----STAQAVASWL--------
-

#endC|gb|DQ403252.1|_Actinobacteria_-_Streptomyces_fungicidicus_Enduracidin_NRPS_Thioesterase
---PLFCVHPAGG-LSWCYTPFAQHAPDD----QPVYGLQARGVDGGAP--------FAG
SLAEMAADYIEQLRQVQPAG--------PYHLVGYS-FGAAPAHEIAVQLREQ-------
GEEVAALVIMDSFP--LDREIA-------------A------------------------
-------TGAEDGAAPGGD---------------LSWEGAIRAEFGHLLG---GFTDE--
-------------EIAVVARTFENNTR---------IRAAHTTGR---------------
---FDGD--------------------------ALILTSADSTTEDGPLTAK--------
---------WAPHVLGELTEV--SIPCGH-VDMVR------PDMMGLAWQAISAWL----
-

#endC|gb|DQ403252.1|_Actinobacteria_-_Streptomyces_fungicidicus_Enduracidin_NRPS_Thioesterase(2)
----SLLCVPFAGAGASFFHPWAALTDGN----PRIVALQLPGREWRLSEEP------YR
DVARAAAELLPVVTEEIGPDD-------RVVIFGHS-LGAVLAYELAHLLVDR------T
GVDVARLFASGSPGPWTRRTRR--------------------------------------
------------ATGLPDEEFLLRVKEFAGYDHEALSHPDMRELILPTLRADVEMHEN--
-------------YVPAGDRPLPVP-----------------------------------
---------------------------------VTAVRGTRDDLVTAEQTG---------
----------EWARATSAGFTRAEVEGGHMYIAEDP-----GSLLRLVDDAL--------
-

#pstA|gb|AJ488769.3|_Actinobacteria_-_Actinoplanes_friuliensis_Friulimicin_NRPS_Thioesterase
---ALVCFPYAGG-NAVNFRALATALRHDG---IAVYGVELPGHDLAADRE------PMA
DVPQIAARVAAEIRDQLR---------IPVLLWGHC-AGAAAALATARLLEQA-------
GAPAERVFLGALLVESAGELRRESAEAEAADNPTLLA-----------------------
--------RLRAESAYVELDGLQPERLDIVGSSYRHDVVTANRYLLDLLAEPHRH-----
------------------------------------------------------------
----------------------------RIEAPVHVVAAADDPTTPGHETRY--------
---------ADWKLVADRVELHEVADGGHYFAGSRPEATAELVRAAC-------------
-

#pstD|gb|AJ488769.3|_Actinobacteria_-_Actinoplanes_friuliensis_Friulimicin_NRPS_Thioesterase
---PLFCLHPGGG-FSWCYAGLVQHLDAD----VPVYGIQARGLD--------GRTTPAS
TMDEMVDDYLTEIRRIQPHG--------PYRLAGWS-FGGLSAHALAVRLRHE-------
GEEVELLALLDAYPPTPGADRL-------------EVVEHEVVAH---------------
---NMRALGFDFEEQELLGDQ-------------EAVLLRFRDFLRASDASLGHLDAH--
-------------DILALKDVYVNN-------------VRIMRA--------------FR
PQFFDGN--------------------------ILFVSAAKMSAQDR--ESRL-------
-----NVHFWQPFIGGSVDVA--DVESTHGDLMTD------PRHVASVGAILDSR-----
-

#massC|gb|EU199081.2|_Proteobacteria_(Gamma)_-_Pseudomonas_fluorescens_SS101_Massetolide_NRPS_Thioesterase
---PLFLVHEFSG-MDVYFPALGQHLPGD----YPIYGLPG--VALGEA--------HLD
SMEGLAARMVGLIRQIQPHG--------PYRLAGWS-FGGVLAYEVAMQLLGQ-------
DEAVAFLGLIDSYVPRMTDQGK-------------ARWSGPD----------------AL
KRHLLLQCTAYWKAQG--GVDELASLDQLEAGLGQLDIAALLQRCRDQGLLYAQMAAATD
-----------ADLLSFLQREVGH---------------GHALAH-------------YS
LFPLPIP--------------------------VHLFSAE--QRPTELSRRSAALG----
---------WDTALAPGQLRQ-VQVPGDHQSMMQAP-------HIQSLGQAMSQAL----
-

#massC|gb|EU199081.2|_Proteobacteria_(Gamma)_-_Pseudomonas_fluorescens_SS101_Massetolide_NRPS_Thioesterase(2)
---PVFCVPGAGD-SVTGFVGLSEALGRD----WPLYGLQPRGLDGEAVPH--------S
QVEAAAQCYLAALEQECP--EG------PVHLVGHS-FGGWVALEMALRLQAM-------
GREVGSLTVIDSEAPGR-------------------------------------------
------------------------------------------------------------
----------------ASKAYTSTAALL------------------------------RL
IEAMQLA-----------------------------------------------------
--------AGKSLGIDAVDFAGRD-------------------------EVAQR------
-

#vinP4|gb|AB086653.1|_Actinobacteria_-_Streptomyces_halstedii_Vicenistatin_T1PKS_Thioesterase
--RLFCFASPMAMGGTHQYARLAAHFRG----VREVSALPMPGFA----TGD----LLPA
TAEAVVEVFGRSLLRAAGDE--------PFVLLGYS-AGGVFAHAVAAWLES-------E
GCAPAAVVLLDSYRADGGTSMD-------------GDFWVSMVEGLFSR-----------
--------------------------EEVFGRFTSARLSAMGRYARL--VGEVKT-----
---------------GEVKAP---------------------------------------
-----------------------------------VLFVRPERSLSASADAGGVGGGDAG
AAAATD----DWRASWDTAETVLEVAGDHFDIIESQAA----ATADAVEGWL--------
-

#mlaG|gb|FJ872525.0|_Actinobacteria_-_Streptomyces_sp._MP39-85_ML-449_T1PKS_Thioesterase
--RLICLSTPMAGGGVHQHARLGSEFRD----VRPVSALALPGFQ----RGE----PLPE
SVEVLSQVLGEAVLAAADGD--------PYVLLGYS-SGGIIGHVLARHLEET------V
GVPPAGLVLIDTFRVEDTAMN--------------VGFGHLMG-ELLTV-----------
--------------------------ETTVGSFDTARLSAMPYYFQV--LAGFDP-----
---------------VRLAAP---------------------------------------
-----------------------------------TLFVQAS-----EPFVQPPEGVDVA
EMRAQP---------WDTEHTLRTVEGNHFSLGQEHAP----ATARAIEEWL--------
-

#becG|gb|FJ872523.0|_Actinobacteria_-_Streptomyces_sp._DSM_21069_BE-14106_T1PKS_Thioesterase
--RLICLATPMAGGGVHQHARLGSEFRD----VRHVSAVALPGFH----RDE----PLPD
SVEVLTQVLGDAVLAAADGE--------PFVLLGYS-SGGIIGHIIARHLKET------L
KVPPAGLVLIDTFRVEDTAMN--------------VGFDHLMG-ELLTV-----------
--------------------------ETTLGNYDAARLSAMPHYFQV--LAGFDP-----
---------------VRLDTP---------------------------------------
-----------------------------------TLFVQAS-----EPFVQPPEGVDVA
EMRARP---------WDSEHTLRTVEGNHFSLGQDHAP----ATARVIEEWL--------
-

#Strop_2778|gb|CP000667.1|_Actinobacteria_-_Salinispora_tropica_CNB-440_Salinilactam_T1PKS_Thioesterase
---IVCLPSPMALGGDQQYARFTAEFGG----TRDVWTLPVPGFG----RDE----SLPA
SSDAAVRVFAEMVRPIAEQG--------PYVIVGYS-SGGLFAHATAGELER-------Q
GHGPTGVVLLDTYLTTG--STT-------------ATFFTHMLDSLLDR-----------
--------------------------EATFGEFSSARLSAMGRYIRL--LESCPI-----
---------------DSIGTP---------------------------------------
-----------------------------------VLFVRP--------QESIVAGDDDG
-----------WRATWETPHTLREVPGNHFTMMEGQVG----ATASVVRDWI--------
-

#acmC|gb|HM038106.1|_Actinobacteria_-_Streptomyces_anulatus_Actinomycin_NRPS_Thioesterase
---PLFCIHPGGG-ISWSYSALIKHLGPE----YPLYGIQARSLARPEP--------RPE
SIEEMAVDYADQIQGVQPHG--------PYHLAGWS-FGGLCAHALAAEFQRR-------
GEPVALVAVLDVIPNWQGLTHD----------------DVPAPDD---------------
RVMLLYHVGLVDDGSHRNDRE-------------ELTFARAREILRRQGSVLANLEE---
------------DRLTTITEISANN-------------THLTVDY--------------Q
PGPIDGD--------------------------LLLIAASEQQ--DPPVTAD--------
--------AWRPYVCGAVEA--HVVPGEHGSMLTR------PGTLAEIGRILSA------
-

#pcbAB|gb|D50308.1|_Proteobacteria_(Gamma)_-_Lysobacter_lactamgenus_ACV_NRPS_Thioesterase
---TLFVLPPGEGGAESYLNNLAKQLPNL-RLVLFNNVHLHTP---------------MQ
SFEDIAQYYMAHVRRLQPRG--------AYNFFGWS-FGGVVSLEMSLQLLND-------
GESVSNLLMVD---SFF-NVEKTVDDLRLPK-----------------------------
------HGNSLDPINHR------YKPNEQALEALAKSADNIVLFKAIEPID---------
-----QHDSDEQ------------------------------------------------
------------------------------------------RKVFEYYASSPFNNLDTL
LPPSA--------------FTLEILGDN--SHFSW-------------------------
-

#paeF|gb|HQ668144.1|_Firmicutes_-_Paenibacillus_elgii_B69_Paenibactin_NRPS_Thioesterase
---PLFCVHPAGG-LSWCYAGLMKHLGME----HPIYGLQARGIAQSET--------LPE
SLDEMTADYIAHIRTVQPTG--------PYRLLGWS-LGGNVAQAMAVQLQQE-------
GEEVEFLAMLDAFPSHYLPIRG-----------------EVDEEE--------------A
LTAMLALGGYD--PDSLGDV--------------PLTMAAAIEILRSDGSALASLDE---
------------AIIRNLRTTYENS-------------VRLLGAY--------------V
PKRYEGD--------------------------LLFFHSTIIP--DWFDPID--------
------PEMWLPYISGQMER--YDIACRH-KDLCQ------PGPLTEIGQQISVKL----
-

#bacC|gb|AF007865.2|_Firmicutes_-_Bacillus_licheniformis_Bacitracin_NRPS_Thioesterase
---NLFCFPPAAS-MGIAYMGLAKHLKQH-----SVYSFNFIPSAN--------------
----RIRKYADIIKNIQGEG--------PYTLIGYS-SGGILAFDVAKELNRQ-------
GYEVEDLIIIDSKYRTKAEKHQ--------------------------------------
---------------FTEEEYREEISKTFELEKYRDVEKLLSDYLVDLVMKSYVYIQN--
---------------TVTTGAIDG------------------------------------
-----------------------------------HISYIKSSDNQRGEN----------
--------MMMWEKATSKTFTVVQGAGTHMQMISKSHP----DILERNARLI--------
-

#irp1|gb|Y12527.1|_Proteobacteria_(Gamma)_-_Yersinia_enterocolitica_Yersiniabactin_T1PKS-NRPS_Thioesterase
---TLFVFHASDG-DISAWLPLASALN------RRVFGLQAK----SPQR--------FG
TLDQMIDEYVGCIRRQQPHG--------PYVLAGWS-YGAFLAAGAAQRLYAK------G
EQ--VRIALID--PVCRQDFCC-------------ENRA-------------------AL
LRLLAEGQTPLALPEHFDQQTPD------------SQLADFISLAKTAGMVSQNLT----
-----------LQAAETWLDNIAHL-------------LRLLTEH--------------T
PGEN--------------------------VPVPCLMVYAAGRP-ARWTPA---------
------ETEWQGWINNADDAV---IEASHWQIMME------APHVQVCAQHITRWL----
-

#grsB|gb|X61658.1|_Firmicutes_-_Brevibacillus_brevis_Gramicidin_NRPS_Thioesterase
---NVFLFAPIGA-QGVFYKKLAEQIPTA-S-LYGFDFIEDDDR----------------
-----IQQYIESMIQTQSDG--------QYVLIGYS-SGGNLAFEVAKEMERQ-------
GYSVSDLVLFD--VYWKG--KV-------------FEQTKEEEEENIKIIME--------
-----ELRENPGMFNMTREDFEL---YFANEFVKQSFTRKMRKYMSFYTQLVNYGEV---
-----------EATIHLIQAEFEEEK---------------------------IDEN---
------------------------------EKADEEEKTYLEEKWNEKAWNKAAKR----
---------FVKYNGYGAH--SNMLGGDGLERNS--------SILKQILQ----------
-

#licC|gb|U95370.1|_Firmicutes_-_Bacillus_licheniformis_Lichenysin_NRPS_Thioesterase
---HLFAFPPVLG-YGIVYGKLAEQMPEY-K-IHAFDFIESDDR----------------
-----AVRYAEAISGLQPEG--------PLTLIGYS-AGCGLAFEVAQTLEKN-------
GRKVEKLLMID---SYMKNG-V-------------SDLEGRSIEAD--------------
---------TAALMEANKDN-----EYMKIKTVADGIAKKMAAYYSYFVNLVHQG-----
--------------TVSCEIH---------------------------------------
---------------------------------LIKSEHAKPLPEWLSTWKEGTES----
--------SYDEYQGAGRH--DEMLADVFVKTNAD--------LIRQIL-----------
-

#syrE|gb|AF047828.1|_Proteobacteria_(Gamma)_-_Pseudomonas_syringae_pv._syringae_Syringomycin_NRPS_Thioesterase
---PLFLVHPLGG-EVQYVRDLAAAIDPQ----VPLYGLAASGLAAGET--------PLY
EVPAMAARYLAAIRQVQPKG--------PYRIGGWS-AGGLIAYEMARQLQSS-------
GEKLEFLGIIDTSARLEQQAPE-------------A------------------------
----------------------------------LSEGQFLMDWLPEQ------------
-----------------LDPEVFR---------------QLT-EL-------------AG
TDAIDEM--------------------------LALCMAHR-LLPEELPQDVDATL----
---------LRSHLAVAHATH-IAI-GNYVSPPAP----------------LTVTLF---
-

#tycC|gb|AF004835.1|_Firmicutes_-_Brevibacillus_brevis_Tyrocydine_NRPS_Thioesterase
---NVFCFTPIG-AQSVYYQKLAAEIQGV-S-LYSFDFIQDDNR----------------
-----MEQYIAAITAIDPSG--------PYTLMGYS-SGGNLAFEVAKELEER-------
GYGVTDIILFD---SYW-KDKA-------------IERTVAETENDIAQLFA--------
-----EIGENTEMFNMTQEDFQL---YAANEFVKQSFVRKTVSYVMFHNNLVNTGMT---
-----------TAAIHLIQSE---------------------------------------
------------------------------LEADEEAP--VAAKWNESAWANATQR----
---------LLTYSGHGIH--SRMLAGDYASQNA--------SILQNILQ----------
-

#snbDE|gb|FN563143.1|_Actinobacteria_-_Streptomyces_pristinaespiralis_Pristinamycin_NRPS_Thioesterase
---PLFCVHPAGG-FGWVYSALLRHTDRE----QPLYALQARGLA-R-P-E-----PLPD
DIDAMARDYAEQIRKTVPEG--------PYEILGWS-FGGLVAHAVAARLQAE-------
GAEVSLLAVLDGYPD---AYDG-------------TEHEVGEEQ---------------V
LAILLNAAGVD-RAQAFGDA--------------PLQRAAVLEKLRDSGSALGNLDD---
------------DAVGRMVTVFLNN-------------TRLIQNF--------------R
PRRFTGD--------------------------MVFFAAAAGH--HDPA-----------
------------------------------------------------------------
-

#snaD|gb|FN563144.1|_Actinobacteria_-_Streptomyces_pristinaespiralis_Pristinamycin_NRPS_Thioesterase
---TVHLVHPPGG-QVACYAQLAAGYPGP----EALVGIRDPRVDDPEPE--------YR
STEQLAEHYLQALAPALESGE-------RIVLGGFS-GGGVIAYEIAQRITAQ-------
GGTPPLVVMVDAGAPDGELTDA--------------------------------------
----------------------------EADGSFAGQLRAVAEGRTPDPASTTTDPEP--
------------------------------------------------------------
------------------------------------PATDDDRAAATAEPAG--------
-------SAAYLAEISQIAEWMRGDGGGDLVALMR-------DSVEAIQR----------
-

#pchF|gb|EU088199.1|_Proteobacteria_(Gamma)_-_Pseudomonas_fluorescens_Pyochelin_NRPS_Thioesterase
-----IFVHDGSG-TLAPYRALFAALGEEAP----LEGLVLNDVPAYLALEP------AT
AIRQLAERYADTLQAEGRR---------QVSIVGYC-LGGLLATELAACLAAR-------
SVEVLQLSVISSYRVPFMIEDD--------------------------------------
-------LLAEYVFARVMQADPLALGYPEDEQAMERTIARVLTQTPG-RVPQGSLLALSE
DAQCAP---ALACLRRLAHKTPEQRLQA-------------------------------I
AEAMRHAGSQLSDL----------------HWLREQLQVLRHSLAAVALHEATPYQGDML
FIRQSGEVQVLPGMHRDMSAYWQALCLGELRVVDVPGDHFSCMQQPQVQAVAQAFDA---
-

#pchF|gb|AF074705.2|_Proteobacteria_(Gamma)_-_Pseudomonas_aeruginosa_PAO1_Pyochelin_NRPS_Thioesterase
-----VLVHEGLG-TLLPYRPLLRALGEGRP----LLGLAVHDSDAYLAIPA------EH
LNACLGRRYAEALHRAGLR---------EVDLLGYC-SGGLVALETAKSLVQR-------
GVRVRQLDIVSSYRIPYRVDDE--------------------------------------
-------RLLLFSFAATLGLDTAALGFP-APERLGQAVQAALAQTPERLVAEALAG----
-------------LPGLADLVALRGRVL-------------------------------Q
AASGSADAVSVER--------------------DTLYRLFCHSVRASQAEAPEPYVGALR
LFVPDAGNPLVPRYAEALETQWRAAALGACGIHEVPGGHFDCLGEALAQSLSKP------
-

#PKS13|gb|DQ019316.1|_Eukaryota_(Fungi)_-_Gibberella_zeae_Zearalenone_NRPS-T1PKS_Thioesterase
---PFYLIADGTG-TIATYIHLP-QFKSQIP----IYGIDSPFLRCP------TRFTTDV
GITGAARFITEALMKAQPEG--------TFVLGGFS-GGAMLAYEVCRQLAAA-------
NRKVDSLMLIDMCSPR-----S---------KTVEDKNDIGWAIFES-------------
-------------------------ISRQN--GLWRSTDMTRQHLQAIFAAVATYHPQP-
-------------LKAS-----------------ERPKRTAIIWAEKG------------
----MIDRCAGDSELMQKLAKRGIPTEPYPKFMEDSELGPVAWGLPHKTKND--------
----LGPNGWERYVG--DALCLSMPA--DHLEMPM-------------------------
-

#ttnB|gb|EU035755.1|_Actinobacteria_-_Streptomyces_griseochromogenes_Tautomycetin_T1PKS_Thioesterase
---LILVCPTVMTTGPQVYSRLAEELD---A-GRRVSALVPPGFHG----GQ----ALPA
TLTVLVRSLADVVQAEVADG--------EFALAGHS-SGGVVAYEVARELEAR-------
GLAPRGVVLIDSYSFDGDGGR----------------PEELFRSALNERFVEYLR-----
---------------------------LTGGGNLSQRITAQVWCLEL--LRGWRP-----
---------------EGLTAP---------------------------------------
-----------------------------------TLYVRPAQPLVEQEKP---------
---------EWRGDVLAAMGQVVEAPGDHFTIIEGEHVA---STAHIVGDWL--------
-

#ABI94380.1|gb|DQ983361.1|_Actinobacteria_-_Streptomyces_sp._CK4412_Tautomycetin_T1PKS_Thioesterase
---LILVCPTVMTTGPQVYSRLAEELD---A-GRRVSALVPPGFHG----GQ----ALPA
TLTVLVRSLADVVQAEVADG--------EFALAGHS-SGGVVAYEVARELEAR-------
GLAPRGVVLIDSYSFDGDGGR----------------PEELFRSALNERFVEYLR-----
---------------------------LTGGGNLSQRITAQVWCLEL--LRGWRP-----
---------------EGLTAP---------------------------------------
-----------------------------------TLYVRPAQPLVEQEKP---------
---------EWRGDVLAAMGQVVEAPGDHFTIIEGEHVA---STAHIVGDWL--------
-

#ituC|gb|AB050629.1|_Firmicutes_-_Bacillus_subtilis_Iturin_TRANSATPKS-NRPS_Thioesterase
---PVFCFPPLIG-YGLVYNEMAKRLDGVST-VYAADFLEEPSHEK--------------
---EIVDRYAESMIRIQEQG--------PFVLLGYS-SGSNLAFEAAKALEKR-------
GRTVSDVIMLD-------SKIT-------------TSVTHLSEEE---------------
---------IEEIVHLNMDIIP---DYYREILTIPSIKDKIRGYLAYHNEVINSG-----
----------------AVNAN---------------------------------------
-----------------------------------IHHLLCGDVTDDRGWTQSTAQH---
---------YLEYKLKGDH--VTIFEPHNIEENA--------EAIRSIIK----------
-

#mycC|gb|AF184956.1|_Firmicutes_-_Bacillus_subtilis_subsp._spizizenii_ATCC_6633_Mycosubtilin_TRANSATPKS-NRPS_Thioesterase
---PVFCFPPLIG-YGLVYNEMANRLDGDCV-VYAADFTEDPSYKK--------------
---PIIDRFAESMIDIQEQG--------PFVLLGYS-SGSNLAFEVAKALEQR-------
GRTVSDVIMLD-------SQIT-------------TSVTHLSEKE---------------
---------VEEIIHLNLDIIP---VYYRELLTIPSIKEKIRGYLAYHNQLINSG-----
----------------TINAN---------------------------------------
-----------------------------------IHHLLCDDMT-ERGWTHSTAHN---
---------YKEYELKGDH--VTIFDPQYIEENM--------STIRSIM-----------
-

#pksL1|gb|L42765.1|_Eukaryota_(Fungi)_-_Aspergillus_parasiticus_Aflatoxin_T1PKS_Thioesterase
---TLFMLPDGGG-SAFSYASLP-RLKSDT----AVVGLNCPYARDP--------ENMNC
THGAMIESFCNEIRRRQPRG--------PYHLGGWS-SGGAFAYVVAEALVNQ-------
GEEVHSLIIIDAPIPQA----------------MEQLPRAFYEHCN--------------
-------SIGLFATQPGA------SPDGSTE-----PPSYLIPHFTAVVDVMLDYKLAP-
-------------LHARRMPKV------------------GIVWAA--------------
----------------DTVMDERDAPKMK----------GMHFMIQKRTEF---------
-----GPDGWDTIMPGASFDIVRADG-ANHFTLMQ-------KEHVSIISDLIDRV----
-

#pks4|gb|AJ278141.1|_Eukaryota_(Fungi)_-_Gibberella_fujikuroi_Bikaverin_T1PKS_Thioesterase
---TLFLFPDGAG-SATSYVTLP-SISS----DMRVIGLNSPYLT--------KPHEFNC
ALQDITGSYLNEVRRRQPQG--------PYHLAGWS-AGGVSAFDAARQLVSE-------
GEVVESLILIDSPNPVG----------------LGKLPKRMYDFLE--------------
-------KSGIFGAF--------EMGEEAQA-----PPDWLFQHFCVFIEALDRY--VP-
-------------EPFEHG----------------MAPKTTIIWAA--------------
----------------DGVCKNPDDPRPEAQPD---DPRGMNWLLNNREDF---------
-----GPNGWDEFIGAGNIS-TMAIENANHFTMMR-EPIASALCAKIRET----------
-

#pksST|gb|L39121.1|_Eukaryota_(Fungi)_-_Emericella_nidulans_Sterigmatocystin_T1PKS_Thioesterase
---ILFMLPDGGG-SASSYLTIP-RLHADV----AIVGLNCPYARDP--------ENMNC
THQSMIQSFCNEIKRRQPEG--------PYHLGGWS-SGGAFAYVTAEALINA-------
GNEVHSLIIIDAPVPQV----------------MEKLPTSFYEYCN--------------
-------NLGLFSNQPGG------TTDGTAQ-----PPPYLIPHFQATVDVMLDYRVAP-
-------------LKTNRMPKV------------------GIIWAS--------------
----------------ETVMDEDNAPKMK----------GMHFMVQKRWDF---------
-----GPDGWDVVCPGAVFDILRAEG-ANHL-----------------------------
-

#PKS1|gb|D83643.1|_Eukaryota_(Fungi)_-_Colletotrichum_lagenarium_THN_T1PKS_Thioesterase
---NLWMVPDGSG-CATSYTEIS-QVSSN----WAVWGLFSPFMK--------TPEEYKC
GVYGMAAKFIEAMKARQSKG--------PYSLAGWS-AGGVIAYEIVNQLTKA-------
GETVENLIIIDAPCPVT----------------IEPLPRSLHAWFA--------------
-------SIG-------------LLGEGDDEAAKK-IPSWLLPHFAASVTALSNYTAEP-
-------------IPKEKCP------------------NVMAIWCE--------------
----------------DGVCHLPTDPRPDPYPTG-----HALFLLDNRTDF---------
-----GPNRWDEYLDVNKF-RTRHMP-GNHFSMMH-GDYVSQTTLSPYNDDN--------
-

#PKS1|gb|AF130309.3|_Eukaryota_(Fungi)_-_Exophiala_dermatitidis_THN_T1PKS_Thioesterase
---NLFLFPDGSG-SATSYVSIP-AIDS?---NLAVYGLNCPFMK--------DPTSYTC
GI?SVS?LYLEKVL?RQPNG--------PYIL?GWS-ASGVFAY?IT?QL?DLQ?LHPDK
NYTVEKLNLI?SPCPIR----------------LEPLPARLHHFFD--------------
-------EIGLL-------------GTGTGK-----TPNWLLPHFEYSIKALTAYRPEL-
-------------KSTRDFN----------------APPTLLIWAT--------------
----------------DGVCGK--------------------------------------
------------------------------------------------------------
-

#pks1|gb|AF549411.1|_Eukaryota_(Fungi)_-_Glarea_lozoyensis_THN_T1PKS_Thioesterase
---HLWMVPDGSG-SATSYTEIS-EIGPN----VAVWGLNSPYMK--------VPEEYKC
GVIGMASSFISEIKRRQPVG--------PYLLAGWS-AGGVIAFEAVNQLIKN-------
GDEVEQLIIIDAPCPDI----------------IEPLPASLHRWFG--------------
-------EIG-------------LLGDGDLS---K-LPKWLLPHFAASVTALSNYSAEL-
-------------IDPKKSP------------------FVTAIWCE--------------
----------------DGVCHLPTDPRPDPFPYG-----HAQFLLDNRTDF---------
-----GPNLWDKYLNGERF-VTKHMP-GNHFSMMK-GDLVSS-----YPSH---------
-

#pks1|gb|AF151533.1|_Eukaryota_(Fungi)_-_Nodulisporium_sp._ATCC74245_THN_T1PKS_Thioesterase
---HLFMIPDGSG-SATSYTEIS-DLGSD----VAVWGMFSPFMR--------TPEEYKC
GVYGMATKFIEEMKRRQPEG--------PYAVSGWS-AGGVIAYEIVNQLTKA-------
GDEVSHLLIIDAPCPIT----------------IEPLPAGLHAWFA--------------
-------EIG-------------LLGEGDGE-AKK-IPSWLLPHFAASVTALSNYTADP-
-------------IPKDKCP------------------KVTTIWCE--------------
----------------DGVCKLPTDPRPDPYPTG-----HALFLLDNRTDF---------
-----GPNRWDEYLDIEKM-TFHHMP-GNHFSMMH-GDLAKQ--LGGFLKEG--------
-

#alb1|gb|AF025541.1|_Eukaryota_(Fungi)_-_Aspergillus_fumigatus_THN_T1PKS_Thioesterase
---KLFMFPDGSG-SASSYATIP-ALSP----DVCVYGLNCPYMK--------TPQNLTC
SLDELTEPYLAEIRRRQPKG--------PYSFGGWS-AGGICAFDAARQLILEE------
GEEVERLLLLDSPFPIG----------------LEKLPPRLYKFFN--------------
-------SIGLF-------------GDGKRA-----PPDWLLPHFLAFIDSLDAYKAVP-
-------------LPFNDSKW------------AKKMPKTYLIWAK--------------
----------------DGVCGKPGDPRPEPAEDGSEDPREMQWLLNDRTDL---------
-----GPNKWDTLVGPQNIGGIHVMEDANHFTMTT-GQK---------------------
-

#wA|gb|X65866.2|_Eukaryota_(Fungi)_-_Emericella_nidulans_Naphtopyrone_T1PKS_Thioesterase
---TLFLFPDGSG-SATSYATIP-GVSP----NVAVYGLNCPYMK--------APEKLTC
SLDSLTTPYLAEIRRRQPTG--------PYNLGGWS-AGGICAYDAARKLVLQQ------
GEIVETLLLLDTPFPIG----------------LEKLPPRLYSFFN--------------
-------SIGLF-------------GEGKAA-----PPAWLLPHFLAFIDSLDAYKAVP-
-------------LPFNEQEW------------KGKLPKTYLVWAK--------------
----------------DGVCPKPGDPWPEPAEDGSKDPREMVWLLSNRTDL---------
-----GPNGWDTLVGKENIGGITVIHDANHFTMTK-GEKAKELATFMKNA----------
-

#AAT69682.1|gb|AY649543.1|_Eukaryota_(Fungi)_-_Cercospora_nicotianae_Cercosporin_T1PKS_Thioesterase
---ILFLFPDGAG-AATSYLSLP-RLGEDIG----VVAFNSPFMKTP-------HKFADH
TLPDVIASYVEGIRGRQAQG--------PYHLGGWS-AGGILAYAVAQELIAA-------
GEEVSTLLLIDSPSPTKG---------------LDRLPTRFFDHCT--------------
-------NVGLFGTELSR-------GSGGPN----KTPEWLMPHFRASIELLHGYHAPP-
-------------MKLGNKT------------------KVMVIWAG--------------
------------ECAFDGVRYAHIPPSAGDTDEDT---EGMKFLTEKRKDF---------
-----GATEWASLFPGTDVDARVVES-EHHFSMMR---DSGAQMLVEHMRDG--------
-

#pksA|gb|DQ149246.3|_Eukaryota_(Fungi)_-_Mycosphaerella_pini_Dothistromin_T1PKS_Thioesterase
---TLFLLPDGGG-SASSYSVIP-KLQSDV----AVVGINCPYARDP--------ENMTC
TWQAMMQSFINEIKRRQPKG--------PYHLGGWS-SGGAFAYVTAEKMIKQ-------
GDEVGSLFIFDAPVPQV----------------MEKLPREFYEAVN--------------
-----------FTESTAV---------GTAE-----PPPYLIPHFMAVVDVMLDYKCKP-
-------------LQTKKMPNV------------------GLIWAD--------------
----------------STVMKEDEAPKMK----------GMHFMIQKRTNF---------
-----GPDGWDEVCPGAKFEIVKAVD-TNHFTLMT-------KARVNYVSDLIDKV----
-

#mmpB|gb|AF318063.2|_Proteobacteria_(Gamma)_-_Pseudomonas_fluorescens_Mupirocin_TRANSATPKS-T2PKS-T1PKS_Thioesterase
---GLFCFPAAGA-GAQSFHALAAALGDV----AQLQVLEYPPLDTQAPP--------DL
SMQRMVAAHVHTVTRRCPAG--------VVRLLGHS-FGASVAFEVAVELQAR-------
-GRQVQLFMLDSFFYVPQELQG--------------------------------------
-----EVLTSAQLRYFLGDTPLCARLLDAQDKGAVVSLKQVRELMRDASLNQGPAQGPG-
-----------AWLAAQIAMSVDYRP----------------------------------
---------------------------------THTFTGDTCVIIAAQSILGASSLP---
------HTLARYCAYLTASPHVATVDGGHMSMLNP-------GNVHTLARALR-------
-

#bpsC|gb|Y16952.3|_Actinobacteria_-_Amycolatopsis_balhimycina_DSM_5908_Balhimycin_NRPS-T3PKS_Thioesterase
---PLFCVHASGG-LSWNYEPLLRYLPPN----QPVYGVQARGLARTEP--------LPG
SVEEMAADYLEQIRAVQPAG--------PYHLLGWS-LGGRIAQAMARLLEAD-------
GERLGLLALLDAYPVYMG------------------------------------------
-------------RKTTG----------------AASEEAALEQRNQQDLDLAGQLVK--
----------GVAARSRLEAVMRNL-------------WKVGPRH--------------T
RSPFAGD--------------------------VLLFVATVDR--PAHLPVP--------
----VAKASWKEFTSGAVEA--HEIPSNH-YDMVQ------SAALGQIGAIVAEKL----
-

#AAM80536.1|gb|U82965.2|_Actinobacteria_-_Streptomyces_toyocaensis_Teicoplanin_NRPS-T3PKS_Thioesterase
---PLFCVHASGG-LSWNYGPLLRELPSN----QPVYGIQARGLARTEA--------LPG
GVDEMAADYVSQIRTVQPTG--------PYHFLGWS-LGGRIAQAMAALLEAE-------
GEQVGVLALLDAYPTYMG------------------------------------------
-------------KKARG----------------DGRTQAAVDKLKEQQMELAAGLVR--
----------GDGARARLEEVMRNL-------------AEVGPRH--------------E
APSFAGD--------------------------VLLFVASKDR--PPHMPVD--------
----WAIASWQPLTSGTVEH--HEIPVDH-NEMMQ------PASLARIGAV---------
-

#bmyC|gb|AJ576102.1|_Firmicutes_-_Bacillus_amyloliquefaciens_FZB42_Bacillomycin_NRPS-TRANSATPKS_Thioesterase
---PVFCFPPLIG-YGLVYNEMAKRLDGRCT-VYAADFLEEPSYEK--------------
---EIVDRYAESMIGIQEQG--------PFVLLGYS-SGSNLAFEVAKALEKR-------
GRIVSDIMMLD-------SKRA-------------VSVNYFSEEE---------------
---------TEEIIHRNLDIIP---DYYRELLTIPSIKDKIRSYLTYHNKLINSG-----
----------------AVNAN---------------------------------------
-----------------------------------IHHFLCGELT-DRGWKQSTAQH---
---------YLEYKLKGDH--VTIFDPHNIEENT--------DTIRSIIK----------
-

#difL|gb|AJ634062.2|_Firmicutes_-_Bacillus_amyloliquefaciens_FZB42_Difficidin_TRANSATPKS_Thioesterase
---PIFWFHSALG-AVELYQPVAERTGRP------FYGIQARGWM--------TDREPIR
GIKNMAEYYVKLIRTVQPRG--------PYDVGGYS-LGGMLAYEVTRQLQLA-------
GETVESIVMLDSFDSAGAREIN--------IPDELFDKNMMLQTVNMA------------
---------LFAPIYQHPERISETLIHRDELNAD-LHEDIFLEQLIAKAKQRGLTKTDAL
-------------VKNLIRQNINVQDAYEITDYELLP-----------------------
----------------LPDPNGVTCYYFRNKNGIFLGELDPYFTIR-ADILS--------
ADFVNYWSQWEEHMTNIAI--MDVAV-SNHMTLLAEDST--AETISEFCGVL--------
-

#AEZ54379.1|gb|HQ840721.0|_Actinobacteria_-_Streptomyces_piomogenus_Piericidin_T1PKS_Thioesterase
--RFFCFPSFASRSGAHQYARLAAAFDG----RHELWALPAPGFA----AGE----RLPA
DLDALVRLHAEDVERLAADE--------PFVLLGHS-AGGWIAHAVATYLEK-------L
GTAPVSVVLLDSYRPG-SAILP-------------RIQAEIAKLLTGG-Q----------
--------------------------LPADQLLDDTCLTAMGGYARL--FESWQP-----
---------------QPLATP---------------------------------------
-----------------------------------TLQLRAAR-----------------
----------------PLPG----------------------------------------
-

#AFO59866.1|gb|JX014302.0|_Actinobacteria_-_Streptomyces_sp._YIM_56141_Cycloheximide_TRANSATPKS_Thioesterase
--DLVCLPSLIAPTGAHQYVNFAGALRG----RRQVWAASLPGYR----PGE----PLPA
DLEAAAERLATTLLRRFGGG--------GFALGGYS-SGGWLAHEVVRRLEA-------A
GAPPAGLVLLDTPRTTGAAMLG-------------GMT-VITRRLLDR------------
---------------------------FPRLPLADEQVTAMARYGEL--LDDWRP-----
---------------LPVTTP---------------------------------------
-----------------------------------TLLVGAAQE----------GPLLEL
LGED-------ARSGWPLEHRRTDLAGDH-------------------------------
-

#epoF|gb|AF217189.1|_Proteobacteria_(Delta)_-_Sorangium_cellulosum_Epothilone_T1PKS-NRPS_Thioesterase
---RLFCFHGSGG-SPEGFRSWSE--KSEWS-DLEIVAMWHDRSLASEDAP------GKK
YVQEAASLIQHYADA-------------PFALVGFS-LGVRFVMGTAVELASRSG----A
PAPLAVFALGGSLISSSEITPEMETDIIAK------------------------------
----LFFRNAAGFVRSTQQVQADARADKVITDTMVAPAPGDSKEPPSK------------
------------------------------------------------------------
-----------------------------IAVPIVAIAGSDDVIVPPSDVQD--------
-----------LQSRTTERFYMHLLPGDHEFLVDRGREIMHIVDSHL-------------
-

#SACE_0724|gb|NC_009142.0|_Actinobacteria_-_Saccharopolyspora_erythraea_NRRL_2338_Erythromycin_T1PKS_Thioesterase
--TVICCAGTAAISGPHE--RLAGALRG----IAPVRAVPQPGYE----EGE----PLPS
SMAAVAAVQADAVIRTQGDK--------PFVVAGHS-AGALMAYALATELLDR-------
GHPPRGVVLIDVYPP---GHQD-------------AMNAWLEEL----------------
---------TATLFDRET--------VRMDD----TRLTALGAYDRL--TGQWR------
--------------PRETGLP---------------------------------------
-----------------------------------TLLVSAGEPMGPWP---DDS-----
---------WKPTWPFEHD--TVAVPGDH--MVQ--EH--ADAIARHIDAWL--------
-

#gfsE|gb|AB469193.0|_Actinobacteria_-_Streptomyces_graminofaciens_FD-891_T1PKS_Thioesterase
--MLVCFPSVVGPSGPHQYARFAGPLRD----RREVWAVAPPGFV----QGE----LLPK
DLATYTDATADAVARRVGET--------PFVLVGYS-SGGWLAHAVASRMEE-------Q
GAAPAGVVLLDTYLPEG--VVG-------------QLGPELVGGLLERRE----------
--------------------------KFRFDFGDDVWLTAMGGYFRL--FDHWRP-----
---------------AAIKAP---------------------------------------
-----------------------------------SLLVRSSE------------PMPGV
PSDT------DWRSRWDLPHTAVDVPGNHYTLMEDHAA----ETARAVRDWV--------
-

#pelF|gb|HE616533.1|_Proteobacteria_(Delta)_-_Sorangium_cellulosum_Pellasoren_T1PKS-NRPS_Thioesterase
---RLFCLPYAGA-GASRFRSWADLLPSW----VEVCPIQLPGREERLAEP------AFV
EPGLLLDALLPALEDHLDR---------PFALFGCS-MGGLLAFALARRLRAR------H
GLTPVHLFGAACMAPHRPYPALQEVARLITEDRVG-------------------------
---ERSIAALERLGILSSAILNDEETRRQVWPSLHADLSIALKYTCEEEP----------
------------------------------------------------------------
----------------------------PLECPLSIFGGLQDRSLGREDLLA--------
---------WHAQTQG--------------------------------------------
-

#tcp12|gb|AJ605139.1|_Actinobacteria_-_Actinoplanes_teichomyceticus_Teicoplanin_NRPS_Thioesterase
---PLFCIHASGG-LSWNYGPLLRHLPPN----QPVYGVQARGLARTEP--------LPG
SVEEMAADYVEQIRTVQPTG--------PYHLLGWS-LGGRIAQAMAVLLEAD-------
GEKVGLLALLAAYPVYMG------------------------------------------
-------------RKATGTVT-----------EEAARDEDALERRKQQELELAGQLVQ--
----------GAGARSRLEAVMRNL-------------WEVGPAH--------------T
ASPFASD--------------------------VLLFVASVDR--PAHLPVS--------
----EAIASWKDGGT--IEP--HEIATNH-YEMVQ------PAALAQIGAIVAEKL----
-

#Rv2383c|gb|AL123456.2|_Actinobacteria_-_Mycobacterium_tuberculosis_H37Rv_Mycobactin_NRPS-T1PKS_Thioesterase
---AVLVFPHAGG-AAAAYRWLAKSLVAN---DVDTFVVQYPQRADRRSHP------AAD
SIEALALELFEAGDWHLTA---------PLTLFGHC-MGAIVAFEFARLAERN-------
GVPVRALWASSGQAPST-VAASGPLPTADRD---------------V-------------
---LADMVDLGGT---DPVLLEDEEFVELLVPAVKADYRALSGYS---------------
CPPDVRIR----------------------------------------------------
-------------------------------ANIHAVGGNRDHRISREMLTS--------
---------WETHTSGRLS----HFDGGHFYLN---DH--LDAVARMVSADV--------
-

#ACY01392.1|gb|GQ274953.0|_Actinobacteria_-_Streptomyces_platensis_subsp._rosaceus_Iso-migrastatin_TRANSATPKS_Thioesterase
---PVFWVHHGNG-GVESYAPLAARCPRP------FYGIQPKGWI--------DSTDILT
GQYAMAEHYASLILAVQPEG--------PYDIGGFS-LGGLFAYETVRQLQLT-------
GADVRTLVMLDTLDAESTNKANALIVGG-NFDADVVTKVSDFRAVNLI------------
----------LGNNRFDSHGGATPILRRDEVDTT-LEPKEFLGSLIDAALARGVSKTETQ
-------------LRSRVRQLSRYFEATQGETYTVDP-----------------------
----------------LPRR----------------------------------------
-DG---------------------------------------------------------
-

#ACY01402.1|gb|GQ274954.0|_Actinobacteria_-_Streptomyces_amphibiosporus_Lactimidomycin_TRANSATPKS_Thioesterase
---PVFWVHHGNG-GVESYAAVAECCGRP------FYGIQPRGWT--------GSEDILT
GQEAMAAYYVDIIRAVQPEG--------PYDVGGFS-LGGLFAYEVVRQLQLQ-------
DATVDTLVMLDTLDAASTNLANSLMTGGRQDDADVVAKVSAFRAVNLM------------
----------LGNDSLDAREGTSSVLHRDEVDTA-LDPDAFLDSLVEAAVARGIHKTPAQ
-------------LRTRVRQLARYFDAVHGERHVVHP-----------------------
----------------LPRREEVRCYYLRNAGGQFFGPFEEYMVLFPEPDLPA-------
VDGTPYWREWADAVDDFFV--IDVDT-ETHAQVMTE------------------------
-

#depE|gb|EF210776.0|_Proteobacteria_(Beta)_-_Chromobacterium_violaceum_FK228_NRPS-T1PKS_Thioesterase
---PLFFAPGAGG-HVPYLRALAAELPNA----FSVWGMTLPG------DA--------G
SVEAMATALIADIRRAQP--YG------PYRLGGHS-FGGWVAFEVARQLAGQ-------
GEAVDWVAVVDSLPPGPAAQ-----------------SRKQDWQG---------------
------GRWVAEIGNSFARLADAELAFDEGEFDALDD-ARRVEHLRERLVEAGAVPEALG
LPEFAARVRAFIAH--SLTDYTPATPYA------------------------------GA
LHVIVAADGDG----------------------------------EALIS----------
--------GWRQAASGAATAVRLAGDHIGIMRRPF---------VNGLAAAL--------
-

#BTH_II1664|gb|CP000085.0|_Proteobacteria_(Beta)_-_Burkholderia_thailandensis_E264_Thailandamide_T1PKS-TRANSATPKS-T2PKS-NRPS_Thioesterase
----RVVLIPGLGMAGTVFRDLCRALTRR----HEVIVYHYPGLGRSDPVAP-------I
DVDAAAAHLYRTLDACGGDG--------AAALLGWS-FGGVIAQRAALMRPRA-------
WRALVLVNTLGAYRPLAPQFLTPG------------------------------------
----ASRDGEPRGLGGLYQTDLDFVFAGDAPPAALARKDACAALMRDSLALDAAQAIDYL
D------------ALVRFDATAQLP-----------------------------------
-----------------------------------SLRMPTLVVAGTADHFG--------
-------------DPAHAEQLVSLIPNARLARIAGAGHAVFLTHGEAFEPAVLAFLD---
-

#oocS|gb|JX315604.1|_Proteobacteria_(Gamma)_-_Serratia_plymuthica_Oocydin_T2PKS-TRANSATPKS_Thioesterase
---SRFWIHPLTG-STGLYLKVAENLG-DDY-AI--WGIHSRGFLTR--------FPPLK
SIESMANYYIEILQAGNATG--------PYELAGYS-MGGIIAYEMARQLQLA-------
GYRVSSLILLEPPFPQPEPLRQ---------SSPFDYRDALLMSANFFLH----------
--------YSLKEILASEQAAFESLAYREQELMG-IDADKQVTWLAEGCLRKGVEQPLSV
VK-----------EKIENMAQILKHNREAMAAYVVKA-----------------------
----------------LPNAQDIDLHYMTLSPSLNDERPDRGSASSALAENNRHVLGEAL
THDESHCQRWLDYLPGAQV--FRTRA-KDHFHLLSERES--VAMISDRCRTI--------
-

#oocS|gb|JX315603.1|_Proteobacteria_(Gamma)_-_Serratia_marcescens_Oocydin_T2PKS-TRANSATPKS_Thioesterase
---SRFWIHPLTG-STGLYLKVAENLG-DEY-AL--WGIHSRGFLTR--------HQPLQ
SIESMARYYIDILQAGNATG--------PYELAGYS-MGGIIAYEMARQLQLA-------
GFRVTSLILLEPPFPQPENLRH---------SSPFDYRDALLMSANFFLH----------
--------YSVKDILASGQVEFETLACTEQELMG-IDADNALAWLAERCLKKGVAQPLSV
VQ-----------EKIENMAQILKHNREAMAAYSVKA-----------------------
----------------LPNAHEIDLHYMTVEPSCHDSRSDK----SALAANNRHVLGEAL
THDESHCQRWLDYLPGAQV--FRTRA-KDHFHLLSERES--VAMISERCRAI--------
-

#SVEN_6264|gb|NC_018750.1|_Actinobacteria_-_Streptomyces_venezuelae_ATCC_10712_Tetracycline_NRPS_Thioesterase
---PVFLVHSGLG-FSLPYVGLARYLDRR----HPLYGLQSPAVGGAAP--------APD
DIRAVAAEYIGHIRRISPHG--------PYRLLGWS-YGGVLAHEIAVQLQQA-------
GEEVDFLANLDGYLGSTGREDT-------------D------------------------
-------DEQELLLRALES---------------LGHSRAAFADQPLTPAGLLDVLRR--
-------------ENHPLAELGERGIP---------RLLRLSRTHGE-----------LM
ERAGRGD--------------------------MHLATREWTADRLDDQTRR--------
---------WEPHVDGHLRIH--PVDCGH-EYLMH------PGPQAVVGRAVDA------
-

#baeR|gb|AJ634060.0|_Firmicutes_-_Bacillus_amyloliquefaciens_FZB42_Bacillaene_TRANSATPKS-NRPS_Thioesterase
---PVFWFHGGTG-GVEAYQPFAKKSQRP------FYGIQARGLT---------GKEPLQ
GIEETAASYKRIIQAVQPKG--------PYDLGGYS-LGGMLAYETARLLQEE-------
GHTVKSAVMIDTPYSEKWKER------------KPSVKSVMLQTINTM------------
----------LTAYLK-PENLEEALISREDITVQ-AEEEEVLKELIGLAKKRGLPKSEEA
-------------IRMQLEQMMKTQLAYGMEEYDMKP-----------------------
----------------LPHPEALQCYYFRNKSGLFLGDLERYLTAEEEQIP---------
LDHDAYWKEWEHQMKQFHL--LDVHS-SNHVTMLSEPKP--QNAIKAFCEKLY-------
-

#dbv16|gb|AJ561198.1|_Actinobacteria_-_Nonomuraea_sp._ATCC_39727_A40926_NRPS-T3PKS_Thioesterase
---PLYCVHASGG-LSWNYAPLLRSLPPN----QPVYGVQARGLARTEP--------LAA
GVEEMAADYVEQIRAVQPTG--------PYHLLGWS-LGGRIAQEMARVLEEQ-------
GEQVGLLALLDAYPTDVGRL----------------------------------------
-------------RRPRG--------------DAADQEAADFDRQQEQQAQLAAAVAT--
----------EAGARKRLDEVMEHL-------------ARVGPLH--------------T
SRSFGCD--------------------------ILLFVATVNR--PSHLPVA--------
----DAIASWRPLTTGTVEP--HEIEIDH-MQMLQ------PAALARIGAV---------
-

#BSU17220|gb|AL009126.3|_Firmicutes_-_Bacillus_subtilis_subsp._subtilis_str._168_Bacillaene_T2PKS-TRANSATPKS-NRPS_Thioesterase
---PVFWFHGGVG-GVEIYQQFAQKSQRP------FYGIQARGFM--------TDSAPLH
GIEQMASYYIEIIRSIQPEG--------PYDVGGYS-LGGMIAYEVTRQLQSQ-------
GLAVKSMVMIDSPYRSETKEN------------EASMKTSMLQTINTM------------
----------LASIAK-REK--DVLISREEVDIS-LEDEEFLSELIDLAKERGLNKPDKQ
-------------IRAQAQQMMKTQRAYDLESYTVKP-----------------------
----------------LPDPETVKCYYFRNKSRSFFGDLDTY--LSNEKEP---------
FDQAAYWEEWERQIPHFHL--VDVDS-SNHFMILTEPKA--STALLEFCEKLY-------
-

#barG|gb|AF516145.1|_Cyanobacteria_-_Lyngbya_majuscula_Barbamide_NRPS-T1PKS_Thioesterase
---PIFCVHPAGG-TVFCYLELSQLLGAN----QPFYGLQSLGQQEGQAPL--------T
TVEEMANVYLAAIREVQP--QG------PYLLMGWS-FGGMVALQMAHDLLSQ-------
GEQVAFLGLLDTYAPAHMP-------------------------D---------------
------EQVLSEDVEVLLELFGGPLSLDWEVLRDLPS-EQQSALIWEQAHQANLVPPDLG
AAQIERLLQLMKLNHKAMRSYSP-PDYP------------------------------DV
ITLLHAEAGSV--------------------------AVSSTEVTTDPTL----------
--------GWQAISPSKVEVHTIPGYHEYMVYQPT---------VVIVAETIKADI----
-

#elaR|gb|HQ680975.0|_Bacteroidetes_-_Chitinophaga_sancti_Elansolid_T2PKS-TRANSATPKS_Thioesterase
---PVFWFHAAAG-GVEPYQALAQTIERP------FYGIQARGYM--------TSRQPLK
GVSAMAAYYVHIIRSVQATG--------PYDLGGYS-LGGVIAYEVARQLQEM-------
GQKVNTIVMLDSLYGAEVSAE------------RFDKRDAILQAVNMS------------
---------LFSGIVHSPERFKEVLVNRSLVSDI-TDTDELISTLMAHFKERGGTQSPAR
-------------LEEFIRQSVRVQEAYAVDQYEVFP-----------------------
----------------LPDPTGIKCHYFRNGNGYFLGELAPFFMLSKEQPA---------
YDHINYWAEWEQQIPDFEM--TDLDV-ANHMMLLSDETA--YNIISSYCHKI--------
-

#Cpin_5289|gb|NC_013132.1|_Bacteroidetes_-_Chitinophaga_pinensis_DSM_2588_Elansolid_TRANSATPKS-T1PKS-T2PKS_Thioesterase
---PVFWFHAAAG-GVEPYQALAQTIERP------FYGLQARGYM--------TERQPLK
GVSAMAAYYIHIIRSVQATG--------PYDLGGYS-LGGVIAYEVARQLQEM-------
GQQVNTIVMLDSLYGAEVSAE------------RFDKRDAILQAVNMS------------
---------LFSGIVNSPERFKEILINRSLVADI-TDTDALISTLMEHFKERGGTQPVAR
-------------LEEFIRQSVRVQEAYVVDQYEVSP-----------------------
----------------LPDPTGLHCHYFRNGNGYFLGELAPFFMLSKEQPA---------
YDHINYWAEWEQQIPDFEI--TDLDV-ANHMMLLSDETA--YHIITDYCRKI--------
-

#fosF|gb|HQ434551.0|_Actinobacteria_-_Streptomyces_pulveraceus_Fostriecin_T1PKS_Thioesterase
--QLVCFPPFAPVDGSLQFARLANHFRG----RRRVSVVTVPGFM----AGE----PLAA
SLEVLIETLAEAVLRAADGR--------PYALLGYS-SSGWLAQAAATWLEE-------R
GTGPVGVVLLDTYPP--DSMTL-------------EMRKAMTYEVVE--R----------
--------------------------RMR--SMHYDGLTALGTYRGM--FRGWQP-----
---------------RQLAVP---------------------------------------
-----------------------------------TLFVRPDSCI-------PGSPEEP-
MAGP------DWQAAWPLDHEETQVPGDHCTMIGEFSE----TTAAAVDEWL--------
-

#AFV96142.1|gb|JX477167.0|_Cyanobacteria_-_Cylindrospermum_licheniforme_UTEX_B_2014_Cylindrocyclophane_T1PKS-T2PKS-T3PKS_Thioesterase
---RLFCFPHAGA-SSYIFNSWPEKFASK----IEVCPIQLPGRGNRVKEP------AKI
KP--LVQTFAPLLKPYLDV---------PFAFFGHS-MGALLSFELARELRRQ------N
YPNPDYLFVGGYRAPHIP-DLNLPIYKLPEP-----------------------------
----KFIQAISGYGGIPENMLQDPFFLQTFLPTFRADFELLDTYFHTKEE----------
------------------------------------------------------------
----------------------------PLESPIYIFGGLEDHTVGIKELSG--------
---------WEEQTKA--------------------------------------------
-

#tubF|gb|GU002154.1|_Proteobacteria_(Delta)_-_Cystobacter_sp._SBCb004_Tubulysin_NRPS-T1PKS_Thioesterase
---PFFWAANLLG-TVFPYFALARCLAP-----HPFYALQPPGLEEGQEPV--------E
KLEDLAALYVHEIRRLQP--HG------PYRLGGWS-FGCVVAYEVARQLEAA-------
GEQVALLVLLDFPAPAERTAAS-------------VWAAARFGSV---------------
------VRGLA----------PYAVEYFDLLARAPREPDGAARVRESLARGWERMRRGGL
LRELWDEAALSRVMPGDSRLLLREPGIA------------------------------PM
VRLARAHQRAMMD----------------YRPTGRLQQRILLWRSEAHARGFAPDL----
--------GWGALSAAGVEVHETPGDHLSLLRPPH---------VEQIAAQLLSLL----
-

#chiF|gb|DQ065771.0|_Proteobacteria_(Delta)_-_Sorangium_cellulosum_Chivosazol_T1PKS-TRANSATPKS-NRPS_Thioesterase
----SFWCHGALG-FGQIFRPLSAALGED----YPVYALQARGVDGTRLPF--------H
RLEDMLTHYVACIRSVQP--RG------PYCIGGYS-SGGILALELARELHRQ-------
GETVARVILLDTYPSTPEVQRW-------------FAGFMDDDYL---------------
------HVAVAAMLFAPGR--ADGLVSVEELQGTPPEVRLGHLASLLAERLGAGWSRDEI
YILLQGAVNVARYTGQALHGYEPSRYNA------------------------------SD
VLYFRAAAGFVDP----------------GRAGSGLTRGVGPDAPDHVAP----------
---------WRDIVASRLDVVSVPADHFSLLSGPG---------LAVIKEHL--------
-

#MAV_0218|gb|CP000479.1|_Actinobacteria_-_Mycobacterium_avium_104_T1PKS_Thioesterase
---PVFVFHPAGG-STVVYEPLLKRLPPD----TPMYGFERVEG----------------
SVQERAAQYVPKLLELNE--DN------PFVLVGWS-LGGALAYACAIGLKRA-------
GADVRFVGLIDT------------------------------------------------
--------------------------VRAGEEIPQTKEETRKRWDRYARFAERTFNVEIP
AIPYEQLE---ELDDEGQVKFVLDIVQQ------------------------------SG
V-----------------------------------------------------------
------------------------------------------------------------
-

#MAV_3056|gb|CP000479.1|_Actinobacteria_-_Mycobacterium_avium_104_NRPS_Thioesterase
---PLFCIHAAGG-LSWSYQVLGNHLD------CPIIGIQQA--EPQHA--------APR
SIREMAQSYADRIQETYPDG--------PYHLVGWS-FGGVVAHELAIELQRR-------
GCAIARLVLLDAQPGLDGSVTA-------------P------------------------
---DAALAEQHMMEEALR--------------SHLAAADHDQPHAHRQFNQLVREAGAEG
-----------MSRHKRLFDVLFGNARN-----------NIERSKI------------HE
PGVFLGD--------------------------VTIFSAVRDHEDRSAFLAEN-------
---------WRPYVAGDIVIH--EIDCTH-DEILN------ADVVDSYGQRL--------
-

#MAP_0220|gb|AE016958.1|_Actinobacteria_-_Mycobacterium_avium_subsp._paratuberculosis_K-10_T1PKS_Thioesterase
---PVFVFHPAGG-STVVYEPLLKRLPPD----TPMYGFERVEG----------------
SVQERAAQYVPKLLELNG--DN------PFVLVGWS-LGGALAYACAIGLKRA-------
GADVRFVGLIDT------------------------------------------------
--------------------------VRAGEEIPQTKEETRKRWDRYARFAERTFNVEIP
AIPYEQLE---ELDDEGQVKFVLDIVQQ------------------------------SG
V-----------------------------------------------------------
------------------------------------------------------------
-

#MAP_3742|gb|AE016958.1|_Actinobacteria_-_Mycobacterium_avium_subsp._paratuberculosis_K-10_NRPS-T1PKS_Thioesterase
----AVCVHDGSG-GLAPYEQLVSELRSAADGAPELYGLRRVAGDAYSRIAP------PE
LFTTLASRYGAAITALAPS---------KVHLVGYC-MGGLLATEIAKCLEES-------
GIVVAPVTVVSSYRVPFDIEDD--------------------------------------
-------DILDYCFAQIMGVSPSDLGLRVADDAIRAAFAAVRSRHAD-LIPPGALRAVAA
PELASALD--------QSAAPGEQRLKL-------------------------------L
AQSG--VLGDSWTA----------------ESLTELRAIFVHSLRSVVQGAADPFLGDVH
FLRQRGDIHFLPTLKEDMTEFWRGYCLGELTITEIDGNHFDCLTGENARSVAGLLLGS--
-

#MAP_1420|gb|AE016958.1|_Actinobacteria_-_Mycobacterium_avium_subsp._paratuberculosis_K-10_NRPS_Thioesterase
---PLFCIHAAGG-LSWSYQVLGNHLD------CPIIGIQQA--EPQHA--------APR
SIREMAQSYADRIQETYPDG--------PYHLVGWS-FGGVVAHELAIELQRR-------
GCAIARLVLLDAQPGLDGSVTA-------------P------------------------
---DAALAEQHMMEEALR--------------SHLAAADHDQPHAHRQFNQLVREAGAEG
-----------MSRHKRLFDVLFGNARN-----------NIERSKI------------HE
PGVFLGD--------------------------VTIFSAVRDHEDRSAFLAEN-------
---------WRPYVAGDIVIH--EIDCTH-DEILN------ADVVDSYGQRL--------
-

#MSMEG_0019|gb|CP000480.1|_Actinobacteria_-_Mycobacterium_smegmatis_str._MC2_155_NRPS_Thioesterase
---PLFCVHPASG-LSWQFAGLKRHLPRQ----IPIYGLQSPLFT---------GTPLPE
SIAELTARYADTIVAVAPSG--------PVRLLGWS-FGGSMALLIAQELSRR-------
GREVTFVGMLDARTDTADPN-A-------------GFDPEAVLAG---------------
---LLREMGFGVD--PQARM----------------TVADAVALVRDTDDAITVLDDE--
-------------QIALVIENYVAA-------------ERLTAD--------------AD
YGRYDGD--------------------------VFFVDAT-ILEMDLAGVASR-------
-----G---WHDHVGGRLKVA--ELDCRH-SELMD------AEVLERLGPLI--------
-

#Mjls_5391|gb|CP000580.1|_Actinobacteria_-_Mycobacterium_sp._JLS_T1PKS_Thioesterase
---PVFVFHPAGG-STVVYEPLMKRLPPD----TPIYGIERVEG----------------
SVEERAAEYVPKLLEMNGWTEGRSG--VPFILAGWS-LGGVLAYACAIGLKQA-------
GADVRFVGLIDA------------------------------------------------
--------------------------VRAGEEVPQTKEETRARWERYARFAERTFNVQIP
EIPYEELE---NLDDEGQVRFVMEAVAA------------------------------SG
VQIPGGIIEHQR-------------------------TSYLDNRMIDTAE----------
----------IKPYDGHVTLYMADRYHDDAIYFEP---------RYATRQPDGGWGEYVS
E

#Mkms_5098|gb|CP000518.1|_Actinobacteria_-_Mycobacterium_sp._KMS_T1PKS_Thioesterase
---PVFVFHPAGG-STVVYEPLMKRLPPD----TPIYGIERVEG----------------
SVEERAAEYVPKLLEMNGWTEGRSG--VPFILAGWS-LGGVLAYACAIGLKQA-------
GADVRFVGLIDA------------------------------------------------
--------------------------VRAGEEVPQTKEETRARWERYARFAERTFNVQIP
EIPYEELE---NLDDEGQVRFVMEAVAA------------------------------SG
VQIPGGIIEHQR-------------------------TSYLDNRMIDTAE----------
----------IKPYDGHVTLYMADRYHDDAIYFEP---------RYATRQPDGGWGEYVS
E

#Mmcs_5010|gb|CP000384.1|_Actinobacteria_-_Mycobacterium_sp._MCS_T1PKS_Thioesterase
---PVFVFHPAGG-STVVYEPLMKRLPPD----TPIYGIERVEG----------------
SVEERAAEYVPKLLEMNGWTEGRSG--VPFILAGWS-LGGVLAYACAIGLKQA-------
GADVRFVGLIDA------------------------------------------------
--------------------------VRAGEEVPQTKEETRARWERYARFAERTFNVQIP
EIPYEELE---NLDDEGQVRFVMEAVAA------------------------------SG
VQIPGGIIEHQR-------------------------TSYLDNRMIDTAE----------
----------IKPYDGHVTLYMADRYHDDAIYFEP---------RYATRQPDGGWGEYVS
E

#SAMR0474|gb|AM238664.2|_Actinobacteria_-_Streptomyces_ambofaciens_ATCC_23877_T1PKS_Thioesterase
---LVCVSGLTAGGGPQEFVRLAAPLRG----ARRVAAVPVLGYGR--GE------LLPA
TPEVALDWQARGILAHAQDT--------PVVLFGHS-GGAILAHRLAVRLA-DLG-----
-APPAGLVLADVYR----LDDP-------------LMADWSAELS---------------
----------EGVFDRAEQFV------PMDD----SRLTAMTWYGGL--FWEIP------
-------------RPD-TRVP---------------------------------------
-----------------------------------TLLLRASEPLREPA---DGR-----
--------DWRSSWKAARD--IVDVPGNHFTMMA--EH--AGTTARAVHRWI--------
-

#cce_3761|gb|CP000806.1|_Cyanobacteria_-_Cyanothece_sp._ATCC_51142_T1PKS_Thioesterase
---RLFCLHHLGG-NASLFQKWSSELEPK----VEVVPLQILRKSQNINQT------NEN
QFHLLIEAMEKVLAPYLDK---------PFAIYGHS-MGAIMAFELAQKLSQT------Q
GKLLQHLFVSSSFSPQKINRVLKEN-----------------------------------
---QLSLEEILNVSEIPEEIRQDSSMMEEITSIFQVDLQLLKSYVYTKNS----------
------------------------------------------------------------
----------------------------PLNCPISTFGGKGDPLIKQEDLLP--------
---------WADHTHIGFR--FMMFPGNHMFLMGKSHKLLLQTILKEI------------
-

#SPO0849|gb|NC_003911.11|_Proteobacteria_(Alpha)_-_Ruegeria_pomeroyi_DSS-3_T1PKS_Thioesterase
---PFFVVAGMFG-NVLNLRHLALMLGRD----RTVYGLQARGLVGEDAPH--------E
TIPEAARDYIAEMRQVQP--HG------PYLLGGFS-GGGIIAYEIAQQLRDA-------
GEEVALLVLLDTPLP-------------------------QRPPL---------------
------GRSDKALIKLQQFRERGPR-YLVDWVK--ARFAW-------EV-----------
------------------------------------------------------------
------------------------------------------------------------
------------------------------------------------------------
-

#LYNGBM3L_57760|gb|GL890964.1|_Cyanobacteria_-_Moorea_producta_3L_NRPS-T1PKS_Thioesterase
---PFFCIHGQQG-NVLNLRELAKSIGSE----QPFYGLQAKGLDGKQMPD--------F
TIEAMAANYLKEIRSVQA--HG------PYFIGGNS-MGGTIAFETAQQLQQQ-------
GEKVALLVMFDTFNKS------------------------AFPRL---------------
------VFRNQHYFKYLSQLGLS-KSLFEELKDVTKR---QLQAILC----KLYLGLGKP
LPHHLSRAIVAEANMQAKWAYSP-QVYS------------------------------GK
ITMFRAKKPAKF--------------------NKFYLPNQADWETRDPEQ----------
--------GWGNLASDKLEIYDVPGDHYSIFDQPN---------VQVLAETLKACL----
-

#teg8|gb|EU874253.1|_Unknown_-_uncultured_soil_bacterium_NRPS_Thioesterase
---PLFCVHASGG-LSWNYGPLLRHLPSN----QPVYGVQARGLARTEP--------LAG
SVEEMAADYLEQIRIVQPTG--------PYHLLGWS-LGGRIAQTMAALLEAE-------
GEEVGMLALLDAYPTYMG------------------------------------------
-------------RKSSR-------------------DEEALERRKEQDLEHAGALVQ--
----------GAGARSRLEAVMRNL-------------WEVGPRH--------------T
APRFAGD--------------------------ILLFVASVDR--PEHLQVA--------
----DAIASWEDFTSGTIEP--HEIPTNH-FEMVQ------PAALAQIGSIVAEKL----
-

#veg9|gb|EU874252.1|_Unknown_-_uncultured_soil_bacterium_NRPS_Thioesterase
---PLFCVHASGG-LSWNYEPLLRHLPAN----QPVYGVQARGLARTEP--------LPG
SVEEMAADYLEQIQAVQPTG--------PYYLLGWS-LGGRVAQAIARLLEAQ-------
GEKIGLLTLLDAYPVYMG------------------------------------------
-------------RNATGTVT-----------EQAERDEEAMEKRNQKDLELAGQLVK--
----------GAAARSRLEAVMRNL-------------WEVGPRH--------------T
ASPFNGD--------------------------ILLFVATVDR--PQHLPVA--------
----VAAASWKDYTTGTIES--HEIASNH-YDMVQ------PAALAQIGAIVAEKL----
-

#ADK54821.1|gb|GQ475282.1|_Unknown_-_uncultured_soil_bacterium_T3PKS-NRPS_Thioesterase
---PLFCIHPSSG-LSWCYTDLVGHLPPD----RPVYGLQARGYGADEL--------LPR
TLEEMAADYFKQIRAVQPSG--------PYHLLGWS-FGGTTAHAVATHIQEQ-------
GEEVALLAVLDGYPLHADT-----------------------------------------
---------------PEGG----------------PNAEKRTKVRL--------------
--------------LSEIRKVNDNN-------------LQLLKNF--------------T
PGLFRGD--------------------------LLLFVAAEGR--PDHSPAV--------
----EAPDSWAPYIDGAIDS--IQIRSDH-DGMLT------AKPVTEIGRLVSERL----
-

#Francci3_2459|gb|NC_007777.1|_Actinobacteria_-_Frankia_sp._CcI3_NRPS-T3PKS_Thioesterase
---ALFCVHPVEG-ISWRYTGLADHLPAD----LPIYGLQARGLARTEP--------LPR
TVADMAADYFERIRSVQPTG--------PYHLLGWS-LGGVVAHALATHIQAR-------
GEQVGLLAILDGYPASTAVR----------------------------------------
-------------SRPEDGR------------EVMPKVRGKMDQRLDRMIEQVVGRGDVG
RG------DVDGERLRRIRSVLDNT-------------MRLGAEF--------------T
PDVLHGD--------------------------LLLFVALLDR--LPSQPAA--------
----EAPTLWRPYVDGRIDG--HEISGAH-QELMQ------AEHLAEIARVITEKL----
-

#Francci3_2981|gb|NC_007777.1|_Actinobacteria_-_Frankia_sp._CcI3_T1PKS_Thioesterase
--TIVCLPSMVAPSGPHNFARLALHLHG----RRDVYALPHPGFG----DGE----LLPA
TADLVVDLHAETIARAFDEI--------PLVLAGYS-SGGWLAHAIAARLET-------R
GIHPRAVVLLDTWLPGDRIPEG-------------DIQEELRGVALNDQ-----------
----------------------------AFALMTEAQVTAQGAYLDL--FEGWRP-----
---------------TAVNAP---------------------------------------
-----------------------------------VVLVRAMERM-------PQQAVAEN
PDGEGQ----AWVTDWVMEHERLDAAGNHQTMMNEHAA----STAAVLHQWL--------
-

#Mvan_5640|gb|CP000511.1|_Actinobacteria_-_Mycobacterium_vanbaalenii_PYR-1_T1PKS_Thioesterase
---PVFVFHPAGG-TTVVYEPLMKRLPAD----TPVYGIERVEG----------------
SIEERAREYVPKLMEIQG--NG------PYILAGWS-LGGALAYACAVGLKSQ-------
GADVKFVGLIDT------------------------------------------------
--------------------------VRAGEEVPQTKEEIRARWDRYALFAQRTFNVEIP
AIPYEQLE---ELDDEGQVKFVLDAVKD------------------------------SG
VDIPGGIIEHQR-------------------------TSYLDNRALDTAV----------
----------IENYDGHVTLYMADRYHDDA------------------------------
-

#SADFL11_1546|gb|EQ973121.1|_Proteobacteria_(Alpha)_-_Labrenzia_alexandrii_DFL-11_T1PKS_Thioesterase
---PLFICAGMFG-NILNLRQLAVLVGRD----RPVYGLQARGLFGNQEPH--------E
TFEEMARDYLAEIRQVQP--HG------PYMLGGFS-GGGIVAYEMAQQLAAQ-------
GEEVAEVILLDTPVP-------------------------EQVHL---------------
------SLVDRVMIKWQDLQKNKTK-FFSVWLR--NRREWR-----ARTEAQQNAAGDQA
TADSFNNERIRLAFMRAHDAYEV-RPYS------------------------------GP
VVLYRPKANVLY--------------------RISGGRRLQDGLNILRED----------
--------NGWSPFVSELSIVEVPGDHDSMVLNPN---------IQVLAS----------
-

#Mspyr1_50180|gb|NC_014814.0|_Actinobacteria_-_Mycobacterium_gilvum_Spyr1_T1PKS_Thioesterase
---PVFVFHPAGG-STVVYEPLLKRLPAD----TPMYGFERVEG----------------
SVEERAAEYIPKLREIQG--DG------PYILVGWS-LGGALAYACAIGLKRE-------
GADVRFVGLIDM------------------------------------------------
--------------------------VRPGEEIPQTKEETRARWDRYALFAQRTFNVEIP
EIPYEELE---ALDDGGQVQFILDAVRE------------------------------SG
VDIPGGIIEHQR-------------------------TSYLDNRLLETAE----------
----------IQPYDGHVTLYMADRYHD--------------------------------
-

#tugD|gb|GQ981381.0|_Proteobacteria_(Delta)_-_Chondromyces_crocatus_T1PKS-NRPS_Thioesterase
--RLICFPTVTPPTGSIQYARFAAALEG----HRDVWVLPNPGFA----EGE----PLPR
DRATLVQQHAESVLRCADGA--------PFALVGCS-SGGWIAHAVASHLER-------Q
GTSPAALALLDTYLM--RDIPA-------------RIESVFKRAWLT--S----------
--------------------------LPDVPRT-TDELTAMPWYATL--FSDWSP-----
---------------EPLAAP---------------------------------------
-----------------------------------TLFIHVTDPM-------PGMADD--
-GST------AWKTRWDLPHTAATLPGDH--ILNDQAE----T-----------------
-

#SACE_4138|gb|AM420293.0|_Actinobacteria_-_Saccharopolyspora_erythraea_NRRL_2338_T1PKS_Thioesterase
--ELVCLPSVLATSGAHQYARFATALRG----RRSVCSLTLPGFA----AGE----PLPA
NLDALVDAAAHAVRARIGDA--------PAALVGYS-SGGLLAHPVAAALER-------D
GARPAAIVLIDTFPPG-----S-------------GLTPAVLDGMFAR------------
--------------------------LAGLDALNDARLTAMGGYLRL--LSDWKP-----
---------------AEIGAP---------------------------------------
-----------------------------------VLLGHAAE------------PPQDA
PD-----------RQWHQPHHGAVLPGDH--VLEDHAT----STAEIVHEWL--------
-

#SACE_4279|gb|NC_009142.1|_Actinobacteria_-_Saccharopolyspora_erythraea_NRRL_2338_NRPS-T1PKS_Thioesterase
---GLVVFPYAGG-GPVNFHSFAQALQSRG---IAVHAVELPGHDLGADAG------SFA
ELEQIVKEVVAEIG-GLGL--------RTVSLWGHS-AGAAFAAYAARLLEEQ-------
GTAVHQVIVAARAMDTVEELQADIAEAGSLSLERIKQ-----------------------
--------RLSAQEAFRELAQLRTEHADNVAQAYRHDVRSAAQYLVDVQVNPPQP-----
------------------------------------------------------------
----------------------------RLSAPLTVVFAEGDPGKAEGLARH--------
---------HRWEAVARHVDHRQISGGGHYFLATHAAEAAAVVRG---------------
-

#SACE_4287|gb|NC_009142.1|_Actinobacteria_-_Saccharopolyspora_erythraea_NRRL_2338_NRPS-T1PKS_Thioesterase
---ALFCVHPATG-LSWCYSGLLRHT--D----MPLHGLQLRGIDG-RDP-------LPA
SLGELASDYADQIQKVRPHG--------PYHLLGYS-LGGNIAHAVAAELHSR-------
GEQVGMLAMLDSSTSD--------------------LGLAEDE----------------V
LARLFDDV-----VGDTE---------RGSAEHQRR---RIAQALGEGVLS---VLPARH
LPS----------AVDAIVNSVR-----------------LAAGH--------------R
PDVVDGD--------------------------VLLVTSRS-----NDDLGP--------
--------QWEPYVRGRVCV--ERVDCTH-DEMLG------SGPLGEIAALVRQ------
-

#SACE_2696|gb|NC_009142.1|_Actinobacteria_-_Saccharopolyspora_erythraea_NRRL_2338_NRPS_Thioesterase
---GLFCVHPKLG-LAWMYSGLLPHLGRE----RPVYGLQATGIDPDHR--------QAP
DITYLAHTYAERIVEQQPEG--------PYYLLGWS-LGGRIAQLAGCVLESW-------
GHEVPLLVLLDAHAEVGGAVAD-------------D------------------------
---DAPPDRSTLYHRWLERAGY--------DVSGLEPTEVTPATVRRYAAEFGGVFGGLD
-----------EEDIHELVNSLLAITR-------------IDRS--------------AE
PGVFGGE--------------------------VLFFSARGGDSK----AIDE-------
---------WRPYLTGTVHEH--EVDFDH-DDLMA------PNSLAQIGP----------
-

#Tcur_1888|gb|NC_013510.1|_Actinobacteria_-_Thermomonospora_curvata_DSM_43183_NRPS_Thioesterase
---PLFFVHPAGG-LAWPYFQFQRHLGPE----QPIYGLQAR-VSGT----------LPE
SVNAMAADYLEQIRTVQPHG--------PYHLAGWS-LGGLIAYEMACRLQAD-------
GEEVALLALIDSYHSQDLNSEK-----------------------------------REV
LPELLEAAGIDAGMKADG----------------TPDMDRIMQVIRERGDAFATLDE---
------------DDLLKLYRNYENG-------------LRCAEEY--------------R
PGRFRGD--------------------------IVF--ATQGR--PDGAPTAR-------
-------ENWQPVTDGQIED--YPIDVEH-HLLME------PGPAAEIGAVL--------
-

#Tcur_4756|gb|NC_013510.1|_Actinobacteria_-_Thermomonospora_curvata_DSM_43183_T1PKS_Thioesterase
---PIFIAHPAGG-TTSCYLQLVALLGEE----QPVYGLERFDDAP--------------
SVEERAARYVEHLLQAQP--EG------PFRLGGWS-FGGVLAYETARQLTAA-------
GREVELVALFDA------------------------------------------------
--------------------------GIP-REVEDESDALARRFAAFADYLNETYNLGVE
-LSYEELA---GLDEEAQFALVMERAAG------------------------------LA
ELLPPAVLHHQL-------------------------TSHQDTRSLEAYR----------
----------PEPYEGRV------------------------------------------
-

#Dtox_2674|gb|CP001720.0|_Firmicutes_-_Desulfotomaculum_acetoxidans_DSM_771_NRPS_Thioesterase
------LFHNGTG-TLTAYNSLLPYLINDPNRTEKIVGFGDEKEYLSNP--------YDK
TIESLGQKYGDLLLQQEASG---------YKLIGYC-IGGLIALETARVLMEA-------
GARVEPVTTISTSFCKRRNSNG--------------------------------------
-----------------------------------AEDEVLLNTIRTSLNNDLLMER---
------------------------------------------------------------
------------------------------------------------------------
--------AFCRVVGAEVSKAGHNVDDELLKKAIS-------------------------
-

#TMO_0595|gb|NC_017956.1|_Proteobacteria_(Alpha)_-_Tistrella_mobilis_KA081020-065_NRPS_Thioesterase
---PVFLIPPVAG-EPAIFLDLAARLGQT------AWGLRFPAHP-------------AA
GLPEFARHLARTVLEIAPRG--------PWRLIGYS-LGGMAAFDAARLIEAET------
GGRVDLVLLDTSAEPVPMHPDA--------------------------------------
---------------------VAAKFDREFARAAADSTDAMGRLAAGLGRPAVARLKAR-
-----------VLRNARATTGWRARG----------------------------------
-----------------------------------VIHGDITMITARRDPAERRPE----
----------RWAAHTTGRFRLIGLDAGHFDLLSDR-------MMPDLVRALAPA-----
-

#VAB18032_07080|gb|NC_015434.0|_Actinobacteria_-_Verrucosispora_maris_AB-18-032_NRPS_Thioesterase
---PLILVHPVGG-DLLCYRPLLAELGER----HRVLGLAAPSPAQLEV-----------
TIEELAAGYLAELAPTLANEPPDR----PIRLAGWS-LGGVVAYEMARQLRR--------
EGRECAVLLIDPWVGCGAHP----------------------------------------
------TVDDTALVKAFLHNLAGAPVEVPVDPCTPNVAQETLRRIWAAPPPQLKELKSMT
YAEVQAMYDVFEANTRALLRYSLVPE-DG-----------------------------LE
LDVVEAS------------------------------RGLVGPAAGYLSPLR--------
------------HAAAKLPARFHMLEADH-VVDGEH--------ADAVARLIDE------
-

#VAB18032_19000|gb|NC_015434.0|_Actinobacteria_-_Verrucosispora_maris_AB-18-032_NRPS_Thioesterase
---TLVCVPYGGG-SAVVYQPLADALPPGH----RLLSVAVPGHDIGVADD------PAP
-IDQVAADVVAEILDRVS---------GPLILYGHCGPGGALVVEVARRLEAA-------
GRELTAVYLGAVFPFGRPAGGLLGPLLRLRLAERLRSD----------------------
-----RIYRTWLQAQGTNIGQLAPDEVRFLIRAMRHDAEVSEEYELMRRRVTP-------
------------------------------------------------------------
-----------------------------LRAPIISVVGERDRGTEFHEERY--------
---------REWHFLSDRTALAVIDEGGHYFLKYRAVELAEIVTDVHR------------
-

#VAB18032_22195|gb|NC_015434.0|_Actinobacteria_-_Verrucosispora_maris_AB-18-032_NRPS_Thioesterase
---TVVTVPDAAG-TALNFQPLAAGLAATN---CALLATELPGHDLARPEE------PLA
DVAQVATRLADEIAARVD---------TPLILWGQG-SGAAVAVQCARLLHDR-------
GRPAAQLVLAAAT-ADPHQLAADLAEVQAMGEGEIRR-----------------------
--------HMAAQATYTELDELKSEREALIERAYRHDTLGAARFLQHARDGWP-------
------------------------------------------------------------
----------------------------ALTVPTWVVVGDDDMRLATEPRPE--------
---------LAWRHFAPTAEQVVLPGAGRHFLRTHADEVVTLLRSIVT------------
-

#VAB18032_22305|gb|NC_015434.0|_Actinobacteria_-_Verrucosispora_maris_AB-18-032_NRPS_Thioesterase
---PLFCVHP--G-LSWGYAGLARHLESD----RPLYGLQSPLLTD-PDS-------AEA
DVAALAERYLERIRAVAPQG--------PYHLLGWS-FGGLVAHEIAVRLRER-------
GEQVGVLALLDAYPVPQ-QGPA-------------AQPPTPAE----------------V
LGVLTGDP----ELRRTD---------HGLSVLPDD--EELARLVREANPALAQLRTAEI
AGI-----------ARAAAGHVE-----------------AMRHH--------------L
PRRYDGD--------------------------LLFVTATEDR--PEQAPTAD-------
--------VWEPYVGGQVTR--VDVAANH-WSMTE------PAPLARIGAALR-------
-

#VAB18032_24915|gb|NC_015434.0|_Actinobacteria_-_Verrucosispora_maris_AB-18-032_T1PKS-NRPS_Thioesterase
---PLFCVHPGAG-MSWSYAGLARHLGPE----QPIYGLQTRALSL-PGY-------RAA
GVPELAEEYLAEIRRVQPHG--------PYRLLGWS-FGGVVAHAMATALQQT-------
GEEVELLAMMDAYPVS--VEEA-------------ARPRTERE----------------T
MLMLLGDDD--GETGELP---------DGLLDRYDP--AAVVEVLRRRDPVLAGP--GEV
HAL-----------VRAAVNHAD-----------------IMAAY--------------R
PGVVAGD--------------------------LLFFSAGRAG--VADGPAPK-------
--------LWEEHFSGVIEW--HDVATTH-LRMTE------REPLAEIGEKLAARL----
-

#tgaC|gb|GQ981380.1|_Proteobacteria_(Delta)_-_Sorangium_cellulosum_T1PKS-NRPS_Thioesterase
--AVLCFPTVTPPTGSIQYARFASTLSG----LRDVWVLPNPGFG----HDE----PLPE
DRATVVRAHAESVVRCAGGA--------PFVLLGTS-SGGWIAHAVASHLEG-------L
GISPAALVLLDTYLM--RDVSA-------------ATATALQRAWIG--Y----------
--------------------------LPSVPRT-DNE--AMPWYSEL--FEDWVP-----
---------------APLAAP---------------------------------------
-----------------------------------TLLVRVTEPM-------PGMEGEVV
PGSG------DWRTHWEQAQAVMDLPGNH--ILTDHAD----TTARLVHDWL--------
-

#RGBS107_02943|gb|DS544878.1|_Proteobacteria_(Alpha)_-_Phaeobacter_gallaeciensis_BS107_NRPS_Thioesterase
---PLFGVHVLGR-NEEFYRPLAAALGPD----QPVYGLSIGLLDSR----------TPT
GVRATAKLYLEEIQTHYPSG--------VVHLAAVS-LGSYFAFELARQLLAA-------
GRDLGLVALFDAEGPAGRSRVQG-------------------------------------
---RARLGAHLGLLRRMGPAYLGHVARHRIETLRNSFERRRLEWTGGGGALSIEALIAAN
--------------QQSVERYTPDPLATP-------------------------------
---------------------------------LTVFRAGDDLFDSPEALTQG-------
---------LGWAPVAAAGFELIEVPGSHLSILQE-------PNVQDMARHMTRIM----
-

#RGBS107_09711|gb|DS544878.1|_Proteobacteria_(Alpha)_-_Phaeobacter_gallaeciensis_BS107_T1PKS_Thioesterase
---PFFLVAGMFG-NVLNLRHLALMVGKD----RPVYGLQARGLIGEDAPH--------D
RLDEAARDYLVEIRSVQP--DG------PYLLGGFS-GGGLTAYEMAQQLQAE-------
GEETAALILLDTPLP-------------------------LRPEL---------------
------SRRDKALIKWAELRSKGIG-YLGEWIG--NRIAW-------EIEKRRYAASGDS
AAPVFNNRKVELAFRAALPVYDL-QPWS------------------------------GP
LTLFRPPLDRHW--------------------QVSAGNWVSREREYVFDD----------
--------NDWTRWAPAVEVVEVPGDHDSMVL----------------------------
-

#Mflv_1169|gb|NC_009338.1|_Actinobacteria_-_Mycobacterium_gilvum_PYR-GCK_T1PKS_Thioesterase
---PVFVFHPAGG-STVVYEPLLKRLPAD----TPMYGFERVEG----------------
SVEERAAEYIPKLREIQG--DG------PYILVGWS-LGGALAYACAIGLKRE-------
GADVRFVGLIDM------------------------------------------------
--------------------------VRPGEEIPQTKEETRARWDRYALFAQRTFNVEIP
EIPYEELE---ALDDGGQVQFILDAVRE------------------------------SG
VDIPGGIIEHQR-------------------------TSYLDNRLLETAE----------
----------IQPYDGHVTLYMADRYHD--------------------------------
-

#MSMEG_0019|gb|NC_008596.1|_Actinobacteria_-_Mycobacterium_smegmatis_str._MC2_155_NRPS_Thioesterase
---PLFCVHPASG-LSWQFAGLKRHLPRQ----IPIYGLQSPL-----------GTPLPE
SIAELTARYADTIVAVAPSG--------PVRLLGWS-FGGSMALLIAQELSRR-------
GREVTFVGMLDARTDTADPN-A-------------GFDPEAVLAG---------------
---LLREMGFGVD--PQARM----------------TVADAVALVRDTDDAITVLDDE--
-------------QIALVIENYVAA-------------ERLTAD--------------AD
YGRYDGD--------------------------VFFVDAT-ILEMDLAGVASR-------
-----G---WHDHVGGRLKVA--ELDCRH-SELMD------AEVLERLGPLI--------
-

#MSMEG_6392|gb|CP000480.1|_Actinobacteria_-_Mycobacterium_smegmatis_str._MC2_155_T1PKS_Thioesterase
---PLFVFHPAGG-STVVYEPLMKRLPAD----VPVYGLERVEG----------------
SIEERAAEYVPKLLEMHK---G------PFVLAGWS-LGGALAYACAIGLKQS-------
GADVRFVGLIDT------------------------------------------------
--------------------------VLPGEPIDQSKEGMRARWDRYARFAERTFNVEIP
AIPYEELE---KLDDEGQVKYVLEIVKE------------------------------S-
------------------------------------------------------------
------------------------------------------------------------
-

#Rv3800c|gb|NC_000962.2|_Actinobacteria_-_Mycobacterium_tuberculosis_H37Rv_T1PKS_Thioesterase
---PVFVFHPAGG-STVVYEPLLGRLPAD----TPMYGFERVEG----------------
SIEERAQQYVPKLIEMQG--DG------PYVLVGWS-LGGVLAYACAIGLRRL-------
GKDVRFVGLIDA------------------------------------------------
--------------------------VRAGEEIPQTKEEIRKRWDRYAAFAEKTFNVTIP
AIPYEQLE---ELDDEGQVRFVLDAVSQ------------------------------SG
VQIPAGIIEHQR-------------------------TSY--------------------
------------------------------------------------------------
-

#Rv0405|gb|NC_000962.2|_Actinobacteria_-_Mycobacterium_tuberculosis_H37Rv_T1PKS_Thioesterase
----ICIPTLTVLSDQREYRDIANAMTG----RHSVYSLTLPGFD----SSD----ALPQ
NADMIVETVSNAIIDVVGGS-------CRFVLSGYS-SGGVLAYALCSHLSVK------H
QRNPLGVALIDTYLPSQIANPS-------------MNEGFSPNDTGKGLSREVIR-----
-------------------------VARMLNRLTATRLTAAATYAAI--FQAWEP-----
---------------GRSMAP---------------------------------------
-----------------------------------VLNIVAKDRIATVENLREERIN---
---------RWRTAAAEAAYSVAEVPGDHFGMMSTSSE----AIATEIHDWI--------
-

#ykris0001_35400|gb|NZ_ACCA01000001.1|_Proteobacteria_(Gamma)_-_Yersinia_kristensenii_ATCC_33638_TRANSATPKS-T1PKS_Thioesterase
----KLFMIPSMGAGATMFAHFLYNPPED----CEVYSVQLPGRENRLHDALYT--HLTP
LLNDLEKVLIDVLAEDKQQHNWQG----GVVIYGHS-YGGIIAFELCRLLRRK------Y
GITPIHFFASATMPPQLTGKWK--------------------------------------
--------------------NQDTMRESSITSNSAQKILGLLSYIDDADFINKVLPGMRR
-------------DMPLLMSYDYQDDSP--------------------------------
-----------------------------LSCPITVFSAIEDEVTQAEEMAL--------
---------WAEQTTSRFQQYLVHGDHWFVSRNKE-------FIGEKIAAEL--------
-

#SVEN_0485|gb|FR845719.0|_Actinobacteria_-_Streptomyces_venezuelae_ATCC_10712_T1PKS-NRPS-T3PKS_Thioesterase
--TVVCLPSFSAIAGVHVYARFADAFGD----GWRVAALAHPGFV----PGE----PLPD
SVDVLAELHARTVLDTVGAD--------PFLLVGRS-AGGWVAHEVAAVLER-------M
GRAPDGVALLDTPARADD---P-------------RGHAVMVGGMLERD-----------
---------------------------SRLVTIDDYRLTAMGGYSRL--FREWKP-----
---------------EPIAAA---------------------------------------
-----------------------------------TLLVH---------------AATPY
GADE------ARIASWDLPHQAVKVTGDH--MLERHSA----TTAEAVEQWSR-------
-

#SVEN_0517|gb|FR845719.0|_Actinobacteria_-_Streptomyces_venezuelae_ATCC_10712_T1PKS-NRPS-T3PKS_Thioesterase
----RVLVHDGTG-TLIPYRSVIRELADRLP----LAGLVVDDIDAFLKADP------RT
QVAELAERHAEALLAEGLG---------RVHLVGYC-MGGLLVPELARRLTAA-------
GAEVTGLTVISSYRVPYLVEDD--------------------------------------
-------LLAEYIFARLMRADLVGLGYPRDE-TATRELVRATTEHFGNTVPPGSLVDRPE
PLLTAKGQEALRAFRLLAGRPQEERLRA-------------------------------I
GASMPVEDAELRSE----------------ERLSRLYAIVKHSLVSVASHEATPSDLPAT
FVRQTGEAEIFPGMHRDMTDYWQQVCGAGLRVVDVPGDHFSCVQPPHAAAVARALLAE--
-

#SVEN_6202|gb|FR845719.0|_Actinobacteria_-_Streptomyces_venezuelae_ATCC_10712_NRPS_Thioesterase
---PLVLVHPVGG-DVLCYRPLLTRLTRT----YTVWGLRAPGTLGERP-----------
PLDSVAALAREYATELRPLFADGS----PVRLAGWS-FGSVVAHETARLLTTGAD----A
VAARADVVMLDPWLADGDTT----------------------------------------
------AGED-ELIRSFFVNLSGGRAAVPARPLAGLTGEAALARALELATAAHPALGSLT
AGSLRTLYALYRAHSQALAGHRPHGA--------------------------------VR
THVLESE------------------------------QGLGGPAGRYLRPLSRVP-----
----------AAHAGPGAPSFLHVPGDHFSIVAEER--------ADLVAGLILGSV----
-

#SVEN_7440|gb|FR845719.0|_Actinobacteria_-_Streptomyces_venezuelae_ATCC_10712_NRPS_Thioesterase
---PLFCVHPGSG-LAGGYAGLLRHLGPA----RPVHALQALGLGAPSEP-------LPA
SVEEMAADYVRRIRAVRPSG--------PYHLLGWS-FGGLVAHAMATRLQSE-------
GEQVGVLAVLDAYPDNRRVLSL-------------QTALSERQ----------------W
LRLLLDDVDHIEGIEGVEGVDGRLG--LGVGERPRLGITSLAEQVGAARSAGTDTLRAAL
RPAGLSDQLLRDPATSTLLNVARNN---------------LNLLS--------------R
PGIFRGD--------------------------LFLADEAVPGLPADPAHTPG-------
--------EWQRHVAGSVHV--SGVAAHH-FQLLH------PGPLAQIG-----------
-

#MT0418|gb|NC_002755.2|_Actinobacteria_-_Mycobacterium_tuberculosis_CDC1551_T1PKS_Thioesterase
----ICIPTLTVLSDQREYRDIANAMTG----RHSVYSLTLPGFD----SSD----ALPQ
NADMIVETVSNAIIDVVGGS-------CRFVLSGYS-SGGVLAYALCSHLSVK------H
QRNPLGVALIDTYLPSQIANPS-------------MNEGFSPNDTGKGLSREVIR-----
-------------------------VARMLNRLTATRLTAAATYAAI--FQAWEP-----
---------------GRSMAP---------------------------------------
-----------------------------------VLNIVAKDRIATVENLREERIN---
---------RWRTAAAEAAYSVAEVPGDHFGMMSTSSE----AIATEIHDWI--------
-

#MT2451|gb|NC_002755.2|_Actinobacteria_-_Mycobacterium_tuberculosis_CDC1551_NRPS-T1PKS_Thioesterase
---AVLVFPHAGG-AAAAYRWLAKSLVAN---DVDTFVVQYPQRADRRSHP------AAD
SIEALALELFEAGDWHLTA---------PLTLFGHC-MGAIVAFEFARLAERN-------
GVPVRALWASSGQAPST-VAASGPLPTADRD---------------V-------------
---LADMVDLGGT---DPVLLEDEEFVELLVPAVKADYRALSGYS---------------
CPPDVRIR----------------------------------------------------
-------------------------------ANIHAVGGNRDHRISREMLTS--------
---------WETHTSGRFT--LSHFDGGHFYLN---DH--LDAVARMVSADV--------
-

#MT3907|gb|NC_002755.2|_Actinobacteria_-_Mycobacterium_tuberculosis_CDC1551_T1PKS_Thioesterase
---PVFVFHPAGG-STVVYEPLLGRLPAD----TPMYGFERVEG----------------
SIEERAQQYVPKLIEMQG--DG------PYVLVGWS-LGGVLAYACAIGLRRL-------
GKDVRFVGLIDA------------------------------------------------
--------------------------VRAGEEIPQTKEEIRKRWDRYAAFAEKTFNVTIP
AIPYEQLE---ELDDEGQVRFVLDAVSQ------------------------------SG
VQIPAGIIEHQR-------------------------TSY--------------------
------------------------------------------------------------
-

#SAV_2895|gb|NC_003155.4|_Actinobacteria_-_Streptomyces_avermitilis_MA-4680_T1PKS_Thioesterase
--------------SNQELVSMATPLRG----TRDVWSLMLPGFVTGQ--------PVAA
DVDAAAEYALRLIEELVDGE--------PFVLAGRS-SGGRIAHEVTSRLEDR-------
GLAPRGLVLIDSYMAGYDATSY-------------IVPVMESKAVEL-------------
--------------------------EKDFGQMTGTRLTAMAAYFG--MFEHWQP-----
---------------KEIATP---------------------------------------
-----------------------------------TLLVRASECYG-------------I
EPGEVQPPAEQWQAAWPLPHEAIDVPGNHYTMLEGNGD----VTAAAVHEWL--------
-

#SAV_3197|gb|NC_003155.4|_Actinobacteria_-_Streptomyces_avermitilis_MA-4680_NRPS_Thioesterase
---ALICFPYAGG-NAINFEPLAQALDAAGG-AVAVYGVELPGHDAGRPDE------AFS
SLEDTARRVVEEIRDKAGD--------RPLMLWGHC-VGSALAVETARLLEAE-------
GTTPAEVFVGGKLLHDAATTRQGIEQAAAMADEDIVR-----------------------
--------WLVDETGFTGFDSLRPEHAAFVAGVFRHDAGSANGYLLAADEHGPKA-----
------------------------------------------------------------
----------------------------RLSAPLTTVFTADDPLTPGHAERY--------
---------TAWSLFADQPRLVELTDGGHYFCRTAAPAVADLVLSR--------------
-

#SAV_415|gb|NC_003155.4|_Actinobacteria_-_Streptomyces_avermitilis_MA-4680_T1PKS_Thioesterase
--ALMCFSPYVVPAGAHQYARFAAPFRD----RLDVWALVHPGYE----KGE----PVPS
DPDVVFRLHAQTVRECAGGK--------PAVLLGYS-SGGWIAHGVAAHLEA-------M
GERPAAVVMVDSFSREVP-FDH-------------QVLNAMAQAHSQRL-----------
---------------------------D-FMRSGGEQLTAMGRYMRL--FDDWAA-----
---------------PQIAAP---------------------------------------
-----------------------------------TLLVRASEPM-------L-AGAG--
-DGD------GRAAPPEHVDTIVEVTGNHYSMLEDHAG----TTAAAVDSWL--------
-

#SAV_865|gb|NC_003155.4|_Actinobacteria_-_Streptomyces_avermitilis_MA-4680_NRPS-T1PKS_Thioesterase
---PVFVMPPALG-LSWCYTPMSRWLADG----FPMYGLQSRGIRGAGP--------VGR
TLTDIATDFVGELRRIQPNG--------PYQLLGWS-FGGNVAHAMAVILEAA-------
GEEVSMLALLDSYP--WDGEQT-------------D------------------------
-------PTLNVESAAADP---------------QLTTEELRRVLQASPGTAAAVPDE--
-------------YLPALAQVFANNRG---------ALLQHRSGR---------------
---FGGD--------------------------VLMFTAADSVAQ-GMDPRS--------
---------WQKFVDGSLKTW--SVNGNH-YEVFG------PEPLETIMSVVNAEL----
-

#SAV_943|gb|NC_003155.4|_Actinobacteria_-_Streptomyces_avermitilis_MA-4680_T1PKS_Thioesterase
--ALICLPTVAAVSSVYQYSRFAAGLNG----HRDVWYVPAPGFL----EGE----PLPS
GIGAVTRMFADAIVRFTDGA--------PFALAGHS-AGGWFVYAVTSHLER-------L
GVRPEAVVTMDAYLP--DDGIA-------------PVASALTSEIFD--R----------
--------------------------VTQFVDVDYTRLVAMGGYFRI--FSGWSP-----
---------------PDITTP---------------------------------------
-----------------------------------ALFLRGRD-----------------
--GE------QMPPPWGVPHTVLDIQGNHFTMLEQFAD----STARHVDEWL--------
-

#SCO7683|gb|NC_003888.3|_Actinobacteria_-_Streptomyces_coelicolor_A3(2)_T3PKS-NRPS_Thioesterase
---TTVLVHAGTA-TIMPYRALITEIRRRSPGLAEVVGVEVPDLSGFLAAPP------DG
LIERMAADYARALTADGRH---------RFHVVGYC-LGGLIATEVARNLAES-------
GAEVESLTVISSHSPRFRLDDE--------------------------------------
-------LLAEYSFAVMMGIDPADLGFPDDQYRVAAAADTVLAASPG-VLPDGGLAALGG
E--FEDVA---SRFRRLADVPRATRIAR-------------------------------M
CEAVPASAGTYEP-----------------DHMTRLFLAFRQSVFAITRYRAEPYAGDIT
FLRHDG-AYPFPGSKDAVTAYWEELTLGDLDIVDIGGDHYSCLSVEHAPGILKTLGELT-
-

#SCO3232|gb|NC_003888.3|_Actinobacteria_-_Streptomyces_coelicolor_A3(2)_NRPS_Thioesterase
---PVFCVHPGSG-MSWCYSGLVRHLPPG----IPVYGLQAAGLD--------GDGPLPA
TLQEMAAEYADLVRQTQPEG--------PYRLLGWS-LGGNVAFAMARELRAR-------
GQEVELLAFLDAYPRRAGAG-P-------------EAPLAEVFAH---------------
---NLRDAGFDVAEEELTGG--------------RFPTARYRAFLNAAGDPMGRLDEA--
-------------ELAAVLEVFMNN-------------AALMRG--------------HT
PGTYDGD--------------------------VLVLAAERADGDKL--ARR--------
-----GAESWRPHVRGRIERV--GVDADHLGLVQS------DAALAVIGRALA-------
-

#SCO6432|gb|NC_003888.3|_Actinobacteria_-_Streptomyces_coelicolor_A3(2)_NRPS_Thioesterase
---VLVLVHPVGG-HLLGYRALIDALPAP----YAVYGLQAPPSGRLPA-----------
TLPELAARYAREVA------ALGR----PVHLLGWS-MGGVLAAETARRTDL--------
VQP-LSLTLVDSFVAATDGA----------------------------------------
------DLDERAAAAGFFTDYLGQRDDV-AEIAVPAGHPDPFGHLAATHLP------REP
ADALRGLYDQYRALYRLLLDHRPRPLPQD-----------------------------CP
LLVVPAE------------------------------RERPDAFGGLTPLHR--------
------------HPAG--------------------------------------------
-

#nfa1890|gb|NC_006361.1|_Actinobacteria_-_Nocardia_farcinica_IFM_10152_T1PKS_Thioesterase
---PVFVFHPSGG-NTLVYEPLLKRLPAH----TPMYGFERVDG----------------
DIEQRAKQYIPELRRIQG--DG------PFVLYGWS-LGAVFALQVAQLLRAE-------
GADVRVVGLIDL------------------------------------------------
--------------------------AIPTRDEDNSPEERVRRIERYQAFARKTYGIDAE
-LDRAQLEELAAASDEEQFKMISDLIKI------------------------------SG
AKIPGGVLEHQR-------------------------TSWIESRHLARTT----------
----------PSRYDGDVVLYLADRYHDGMIELEP---------RFAERKPNGGWDEYLP
H

#nfa50620|gb|NC_006361.1|_Actinobacteria_-_Nocardia_farcinica_IFM_10152_NRPS_Thioesterase
---PLFCVHPAGG-VAWSFAGLAAHLEPD----LDLYGLQSPVLNSAAP--------LPD
SIEEWARRYVREIRAVQPEG--------PYHLLGWS-LGGVLAHAVAVQLQDE-------
GQRVATLAMMDS--PRLVEP---------------V------------------------
---AVSTVPVADLLGGLLGDHAAVLDAEFDPARLD--PARLAELIADLPEPFASFGAE--
-------------RLSRLLAEGARS-------------LDLIARY--------------R
PRRYKGT--------------------------LLYFTAAHDDP---TGAGGAAG-----
---------WAEAVDGTVHNH--AVAATH-WRMTS------DTALARIGHVLTT------
-

#nfa7180|gb|NC_006361.1|_Actinobacteria_-_Nocardia_farcinica_IFM_10152_NRPS_Thioesterase
---PLFCIHPLGG-IAWSFAGLAAHLETD----RPIYGLQSPALGSRES--------LPD
STEKWALRYLEEIRSVQPQG--------PYHLLGWS-LGGVLAHAIAVQLQEE-------
GERVELLAMMDSYLPEAIDPSM-------------I------------------------
---PAEPVPMTELLGGLLGQQVT--DLGIDDGAPG--PAELARRLAQLPEPFASFGAD--
-------------RIERVLTAARHS-------------LRVTAGY--------------R
PHRFEGD--------------------------LVYFSAVEDEP---TGRLGADT-----
---------WTSAIGGRIDTH--PVPTTH-WRMTT------TAGLSAIGRVLDR------
-

#nfa7190|gb|NC_006361.1|_Actinobacteria_-_Nocardia_farcinica_IFM_10152_NRPS_Thioesterase
---PLFCIHPFGG-IAWSFAGLAAHLGGD----RPIYGLQSPALGSDET--------LPD
STEKWALRYLEEIRSVQPRG--------PYHLLGWS-LGGVLAHAIAVQLQAE-------
GEQVELLAMMDSYLRSEIAESA-------------I------------------------
---PAGEAPLAELLGGLLGDDAPGVDLAVGDGVDGADPAGLARRLAELPEPFASFGAD--
-------------RIARVLDAAVRS-------------ATVTERY--------------R
PRRFAGE--------------------------LVYFAAAEDDP---TGSVGAAT-----
---------WVDAVDGPIRTV--PVPTTH-WRMTT------AAGLAVIGRTLDEL-----
-

#nfa7200|gb|NC_006361.1|_Actinobacteria_-_Nocardia_farcinica_IFM_10152_NRPS_Thioesterase
---PLFCLYPMAG-LSWGYAGLLPYVEQG----RPVLGLQSPALSEPDY--------LPE
SLGEMAARCLAEIRSVQPYG--------PYHLLGWS-LGGILAHAVAVALQEA-------
GEQVALLALLDSH-----HDIA-------------A------------------------
---ADFRVALRGALAEIGIQADN------LLGDSPAPA-------------LGEDELL--
-------------ALHAAIP----------------------------------------
PE----------------------------------------------------------
------------------------------------------------------------
-

#nfa11050|gb|NC_006361.1|_Actinobacteria_-_Nocardia_farcinica_IFM_10152_NRPS_Thioesterase
---ALFCVHPSSG-MAWTYLGLADALAPG----RPIYGLQAPDLSGREP--------SPG
SIEAFARRYLREIRAVQPDG--------PYHLLGWS-YGGLIAHAMAAQLAAE-------
GAEVGVLALLDA---DTADIDG-------------D------------------------
---SIEPLTAGTFVHTFGAVFG------IEDVPAAATAEQAAELIAARMGGAAVVDAA--
-------------TLERMAASYNAS-------------ARTRTGY--------------R
RPVFPGD--------------------------AVYFHATVDS----SEIFGPDG-----
---------WRPYITGRLTSH--DIEATH-DELTA------PHVLPRIARLLDQHL----
-

#nfa27950|gb|NC_006361.1|_Actinobacteria_-_Nocardia_farcinica_IFM_10152_NRPS_Thioesterase
---PLFCIHPASG-LAWCYRPLAEFLTGD----RPIYGLQAPQLGGEEP--------GPD
SIVETARRYVAEIRGVQPHG--------PYHLLGWS-LGGLIAHAVAAEIRAA-------
GEDVALLAMLDA---EVDGIDA-------------S------------------------
---TVTTVTAGELIANLGPVIG------IDFVPTDATPEEAADLIRRRLGDGLAIDAA--
-------------AIERLTDTYNRS-------------IRAAGDW--------------E
PGVLDSD--------------------------LLYFTALRDRR---PDARGHRG-----
---------WAPVVAGEITNV--DVDAAH-LAMTE------PSVLARIARVLDE------
-

#nfa31170|gb|NC_006361.1|_Actinobacteria_-_Nocardia_farcinica_IFM_10152_NRPS_Thioesterase
---ALFCVPPGVG-LSWCYSGLLAHLPTD----VPVYGLQSPHVSG-AA--------GFA
DMTEAAEHYVAAIRSIQPHG--------PYHLLGWS-LGGLIAHEMAVQLRAA-------
GEEVALLAMLDS--HRL-GERW-------------M------------------------
---AVATPSAADILAEFGVEIEADA--------ADLDPIAAARLLRAQPGPFAALTDE--
-------------HLDALFREYRTG-------------TVLARDF--------------R
PRVFDGD--------------------------LLFFHAAADEINRADPDRRAAA-----
---------WSPYVAGTVHEH--QVPCAH-AAMTT------PEALALIGPLL--------
-

#MUL_4983|gb|NC_008611.1|_Actinobacteria_-_Mycobacterium_ulcerans_Agy99_T1PKS_Thioesterase
---PVFVFHPAGG-STVVYEPLLNRLPAD----TPMYGFERVEG----------------
SIEERAAQYVPKLIEMQG--DG------PYILVGWS-LGGVLAYACAIGLKRL-------
GKDVRFVGLIDA------------------------------------------------
--------------------------VRAGEEIPQTKEEIRKRWDRYAKFAEKTFNVTVP
AIPYEHLE---ELDDEGQVRFVLEAVSQ------------------------------SG
VEIPAGIIEHQR-------------------------TSYLDNRAIDTAE----------
----------IHPYDGHVTLYMADRYHD--------------------------------
-

#SACE_4138|gb|NC_009142.1|_Actinobacteria_-_Saccharopolyspora_erythraea_NRRL_2338_T1PKS_Thioesterase
--ELVCLPSVLATSGAHQYARFATALRG----RRSVCSLTLPGFA----AGE----PLPA
NLDALVDAAAHAVRARIGDA--------PAALVGYS-SGGLLAHPVAAALER-------D
GARPAAIVLIDTFPPG-----S-------------GLTPAVLDGMFAR------------
--------------------------LAGLDALNDARLTAMGGYLRL--LSDWKP-----
---------------AEIGAP---------------------------------------
-----------------------------------VLLGHAAE------------PPQDA
PD-----------RQWHQPHHGAVLPGDHFTVLEDHAT----STAEIVHEWL--------
-

#SACE_0724|gb|NC_009142.1|_Actinobacteria_-_Saccharopolyspora_erythraea_NRRL_2338_T1PKS_Thioesterase
---VICCAGTAAISGPHEFTRLAGALRG----IAPVRAVPQPGYE----EGE----PLPS
SMAAVAAVQADAVIRTQGDK--------PFVVAGHS-AGALMAYALATELLDR-------
GHPPRGVVLIDVYPP---GHQD-------------AMNAWLEEL----------------
---------TATLFDRET--------VRMDD----TRLTALGAYDRL--TGQWR------
--------------PRETGLP---------------------------------------
-----------------------------------TLLVSAGEPMGPWP---DDS-----
---------WKPTWPFEHD--TVAVPGDHFTMVQ--EH--ADAIARHIDAWL--------
-

#Strop_0688|gb|NC_009380.1|_Actinobacteria_-_Salinispora_tropica_CNB-440_NRPS_Thioesterase
---HLHLVHGAGG-SPQDYQHLLAELPQH----WRVTASRDSGQLP--------------
TVPALAHRYQADLDTAGLVP---------DLLGGWS-FGGQVAYQMVADQTER-------
---RPALVLLDSAPPVGYELSADN------------------------------------
-----VRQRFDTFTENVYRAFNLESDAPRSRVTGGAGPAGFHERLAVGALAACLAAIQQP
-------------VPAALLAHQWNSYER--------------------------------
-----------------------------------HLRASAEYVHDGPVDAPALVIG---
--ADLLDAQLAQWAARVGALRSHRIDADHFGVLTS-------AAAAQVAAAVI-------
-

#Strop_2654|gb|NC_009380.1|_Actinobacteria_-_Salinispora_tropica_CNB-440_NRPS-T1PKS_Thioesterase
---PLFLIHPSGG-DVLCYGELVGLLTDD----RPVVGLTDP-ALTGGVE--------PA
DIPALAGHYLDAVRQYQPHG--------PYLLGGWS-MGGTLAHEMACLLERR------G
ES-TALLFMIDSNTPDRIRTLH-------------GQGAPQNI---------------AA
VRYLHSLAAFLDLDLGFGPTEEA---------ELHGRTGDEIRRAVTQRLRDVGLLSQ--
-----------RDTADLRLRVFERH-------------LRMLGEH--------------Q
AGHLS-------------------------DPATRLLLVRAALPSPRNSGVGMGVDDAPD
----LPGLGWDGHVHGPIREV---AVEGHHYSLLT------GGAVTTIAKHLNETL----
-

#SGR_3264|gb|NC_010572.1|_Actinobacteria_-_Streptomyces_griseus_subsp._griseus_NBRC_13350_NRPS_Thioesterase
---PLFCLHPVGG-VSWMYSGLMRHIDGD----RPLYGIQARGLARQ---E-----RLPA
SIAEMAEDYTERIREVQPSG--------PYHLLGWS-MGSLLAHAVAVRLQQQ-------
GQEVALLANLDQPPVSAEELDG--------------EYVAADDQK--------------V
YAALLDFVGRD--PGMFGDG--------------PLERDRVIEVLREEGSALATFDD---
------------EHILRIGGVNNNN-------------WSLTIGY--------------E
PEVFDGD--------------------------VLLFVATRDE--DGPRDKTG-------
----RSVARLQPFVTGKVEV--EEIDCEH-RRLLQ------AGPVAEVGRALQQRL----
-

#SGR_6183|gb|NC_010572.1|_Actinobacteria_-_Streptomyces_griseus_subsp._griseus_NBRC_13350_T1PKS_Thioesterase
--VLICLSTITALSSVYQYARFGTALNG----RREAWFVPVPGFT----AED----PVPA
DVDAVVELHADLALRCAEGR--------PFALVGHS-AGGWLAHAVTSRLED-------R
GVPPVGTVLIDTYLPG-SSAFT-------------QVQDALTDLMFD--H----------
--------------------------ESTVGRLDSVRLTAMGAYLRL--FDDWSP-----
---------------EPVHTP---------------------------------------
-----------------------------------TLFVRAGEPV-------TD---TV-
-RGD------GWRLSWPLPNTTREVPGDHFSLMQSGAA----TTAEAVDAWL--------
-

#SGR_6739|gb|NC_010572.1|_Actinobacteria_-_Streptomyces_griseus_subsp._griseus_NBRC_13350_NRPS_Thioesterase
---PVHCVHPAGG-LSWCYAGLIRNLPAD----VPIYGLQAQGVGEATADG-----PLPT
TLEELAAHYASRIREVQPEG--------PYRLLGWS-TGGIIAHAIAAVLQEG-------
GQEVELLAILDAYPAEGFRELP-----------------VPDRAE--------------A
LESLLTMGGYG--PESLGDK--------------ELNTANVVEVLRREGSPLAALSA---
------------AKIEALGEVYLNT-------------NDLVRAY--------------D
HRVFQGD--------------------------VLFFRATVD---TIDETLT--------
------PETWTPYVSGRIDN--TDVACSH-KDMTL------PEPIAHIARVVADRL----
-

#SGR_6777|gb|NC_010572.1|_Actinobacteria_-_Streptomyces_griseus_subsp._griseus_NBRC_13350_TRANSATPKS-NRPS-T1PKS_Thioesterase
---PVFWIHGALA-GVESYRTIAERVDRP------FYGIQARGLL--------TEDAPIE
GVTAMAEHYTEAIRSVQPEG--------PYDVGGFC-LGGIIAYEVTRLLQAR-------
GQEVASLTMVDSPDETGLAKSN--------ANGFQSARSAALQVVNSL------------
---------LWPAGEKDPAVLRARLVHRDEVAEEDLDEDAFVLRLAELAAGRGLAMRPAQ
-------------IARFTRRNMAIQLAYRLGEHTIRP-----------------------
----------------LPRPRAVVCTYFRNRRGLFLGEAEPYFQVAGETFS---------
LDHVNYQQDWGREMPDLRL--VEIEA-ANHMTILNDAEP--LAAIEETCLA---------
-

#SGR_6785|gb|NC_010572.1|_Actinobacteria_-_Streptomyces_griseus_subsp._griseus_NBRC_13350_TRANSATPKS-NRPS-T1PKS_Thioesterase
--DLVCLPSLIAPTGAHQYVNFAGALRG----RRQVWAASLPGYR----AGE----PLPA
DLEAAAERLAATLLRRFGGG--------GFALAGYS-SGGWLAHEVVRRLEA-------A
GAPPAGLVLLDTPRTTGAAMVG-------------GMT-VITRRLLDR------------
---------------------------FPRLPLADEQVTAMARYGEL--LDGWRP-----
---------------LPVTTP---------------------------------------
-----------------------------------TLLAAAAQE----------GPLREL
LGDD-------ARSGWPLEHRRADLTGDHFSLLEEDAA----ETAFTVDRWL--------
-

#SGR_653|gb|NC_010572.1|_Actinobacteria_-_Streptomyces_griseus_subsp._griseus_NBRC_13350_NRPS_Thioesterase
---PLFCVHPAGG-LAWAYAGLLPHLEND----RPLYGLQTPNLDGTRP--------FPD
SIEAMAAVYVAELRAVQPHG--------PYHLFGWS-FGGNVVQEVAVQLQEA-------
GEEVALLTILDAFPLAPLDDLD-------------R------------------------
---ASRDTVFRALLSNMGVGQEA------LAGDGPVEAGDVRDQFRANGSPLGALEPA--
-------------TIDAMVDNFAGQ-------------ARLMRRY--------------T
PRVFHGP--------------------------ALFFTAAEGRP---ADTFDLSL-----
---------WNPYITGPIENH--DVACAH-AQMMQ------PAAREQIGTTVTAVL----
-

#SGR_814|gb|NC_010572.1|_Actinobacteria_-_Streptomyces_griseus_subsp._griseus_NBRC_13350_T1PKS-NRPS_Thioesterase
---ALFCFPPAGG-HGLVYRGLAAQLPDY-S-VTGFNYLPGDDK----------------
-----VSRYADLIEADRPDG--------PYLLLGYS-LGGNLAFETAKELERR-------
GRDVAHVVILD------------------------SRRILAAYEPD--------------
---------ASGIAAFESELADHVRKHTGSEAVAHETLAHAAEYLAFCGRTPNTG-----
--------------TVAATVS---------------------------------------
-------------------------------VITDEEKTALYAAGEHGTWHGSSTG----
--------ATAVLRGSGVH--ADMLDAKHLPRNA--------ELVRSVL-----------
-

#gll1941|gb|NC_005125.1|_Cyanobacteria_-_Gloeobacter_violaceus_PCC_7421_TRANSATPKS-T1PKS_Thioesterase
---RLFCFHHLGG-GASVFRQWADALPAD----VEVCPVQFPGREERIAEM------PLT
SFCAAIELLVQVLEPHLDR---------PFALYGHS-MGSLVGFELAHRLGEH------H
GLQPEHLFVGGLWAPHLHAAKM--------------------------------------
---AHQQASLSTLLEIPAALRTDAQFMAQLWPAVEADNHLCRSYSYQERAR---------
------------------------------------------------------------
----------------------------LLGCPLTVFGGLQDRVAGREELTA--------
---------WNRHTNGIFR--LQMFPGRHLFLNDSRDALLKVLARSL-------------
-

#gll1954|gb|NC_005125.1|_Cyanobacteria_-_Gloeobacter_violaceus_PCC_7421_TRANSATPKS-T1PKS_Thioesterase
---RLFCFHYLGG-GASTFRQWPEGLPAD----VEVCAIQLPGREERLEEP------PVA
DFFALIATLAEQIGPELDR---------PFAFYGHS-LGALVCFELARRLRRQ------S
GALPVHLFAAAYYAPHLRTPSQGTGVSGWTD-----------------------------
---ARLREEIPRVISAPQSLMDNAEFMQVLLPRVRADACLLSTHLYTEEP----------
------------------------------------------------------------
----------------------------PLDCPITAFGGLQDTVVDRESLAA--------
---------WSAHTNGAFQ--LEMFAGNHIFLESAREAVLGAVAAGL-------------
-

#MAE_38550|gb|NC_010296.1|_Cyanobacteria_-_Microcystis_aeruginosa_NIES-843_NRPS-T1PKS_Thioesterase
---AVFLFPPALG-FAAAYANLAEYLTNY-A-IYTFRYISDELM----------------
-----LKKYAELIEDLAQNQ--------DIKLMGHS-AGGFLAMLMAQQLESR-------
GRVVSDVILLD---TYRGGREA-------------KKADMSEIQEG--------------
----------VDAFLLNPKRQELRGYFLENQKLRNRTYNQVWEYFNFLWNSDLKN-----
---------------VQIQGT---------------------------------------
----------------------------------IHLIRAEGNYEAQDDWTQATKGE---
---------RINHYATGIH--REMIDPPYLPKNALI------------------------
-

#MAE_60000|gb|NC_010296.1|_Cyanobacteria_-_Microcystis_aeruginosa_NIES-843_NRPS_Thioesterase
---PFFCVPGAGG-RPFYFYHLGRCLGKD----QPFYSFENDLYQQFG-EI--------T
RIEDIASIYLQAMQDLQP--QG------PYFLGGHS-YGGNVAFEMAQQLVNQ-------
GQQVALLAIIDSSAPTYKD-KQ-------------ILLDYINWDH---------------
------ARWLAEVSKGIEVYLDKTIDISYETLQLLTV-EEQLKYALNFFKLANMLPPNAE
TRQLEKIVQAYKTSCLCLIDYLPKQIYP------------------------------GK
ITIIRAREELA----------------------DDPNKDLIAGDCEDSSL----------
--------GWSEFSTEPVEIHFVLGNHVSIMVEPH---------VQILAEELKVCL----
-

#Npun_R6587|gb|NC_010628.1|_Cyanobacteria_-_Nostoc_punctiforme_PCC_73102_NRPS-T1PKS_Thioesterase
---PFFCVHGLGG-EVLRFRQLAVHLGSD----QPFYGLQPQGLDGKQLPY--------T
RIEDMAAHYIQQIQTIQP--GE------PYLIGGYS-SGGIIAYEMARQLVMQ-------
GKEVALLVLFDTYGSK------------------------NTESL---------------
------SLQKPASHDWKSLLAIASNYLIEQVKGNAERFKYQIKEIVWRFVFHFHLILSRP
LPYSNRKYMVEHATIQALRKYAL-QVYS------------------------------GR
ATVFRTEDGLVV--------------------GQ---------READSKM----------
--------GWGKLALGGVDIYDISGIHNSIFKEPH---------VQSVSEKMKAC-----
-

#Npun_F2184|gb|NC_010628.1|_Cyanobacteria_-_Nostoc_punctiforme_PCC_73102_T1PKS-NRPS_Thioesterase
---PLFCLPGAAG-YPFYLYDLARCLGSD----QPFYSFQAIAPGEGGELI--------T
QVEDVAARYIQELFVVQP--QG------PYFLAGHS-FGGKLAFEMAQQLLRK-------
GYKVALVAILDTTAPFHQK-NP-------------SAFD---LDN---------------
------TKWLAELADTIEVVYGKKMDCSVDTLQSMVW-EDQLKYVLERLKNADILPPDDE
ITQLNNMVQLLKAN--AVVNYVPQEIYP------------------------------TK
ITLLRAKENVVK--------------------VNESNSEVLSDILQDSHW----------
--------GWSKFSAEPVNVHFVPGNHVTMMNLPH---------VQTLAEQLKACI----
-

#Npun_F2463|gb|NC_010628.1|_Cyanobacteria_-_Nostoc_punctiforme_PCC_73102_NRPS_Thioesterase
---SLFFLPGANG-HGFYFRDLAINLGTER----PVYGLETPGRDGLS--------ALPE
SVAAHANQLIDVLRQQQAQG--------PYILAGYS-SGCAVAFEIASQLEQQ-------
GETVSLVAILDAGLVSKPEYFTDR------------------------------------
----AELDWIWQLIRRIEALKGVSLGLQYNDLATKPNDQAKWELAAEYLYRNNVLPEHST
LSLLKTNMKVMKGLTLNYAHYQPTHPIS--------------------------------
-------------------------------APIVLFRAQEIHEIVLQEIQAFSDYD---
------LLDWGWQTYTQKPVKVISVPGNHGGMLYEP-------NVKLLATQLQ-------
-

#Npun_R3023|gb|NC_010628.1|_Cyanobacteria_-_Nostoc_punctiforme_PCC_73102_NRPS-T1PKS_Thioesterase
---PFFCIPGAGG-NSIYLYNLAHHLGRD----QPFYALQALGLDGESTPH--------T
SVEEMATHYIQAIQSVQT--EG------PYFLGGHS-LGGMVAFEMACQLQKL-------
GHKVALLALLDCGAPENIDNID-------------TVQQNVEIDD---------------
------ADWLNEIGFLFEQFYGKSLEISYEILQSLTP-DTQLQYFQERLQMANLLPAGIG
IKQLRGLMQVYKTN--MQIVYTTQNIYE------------------------------NK
ITCFISSETEN-------------------------VSSENSESLEDTRL----------
--------DWDNFSTKPLDIYVVPGNHATMLNEPN---------VQVLAEKLRTCI----
-

#Npun_F3173|gb|NC_010628.1|_Cyanobacteria_-_Nostoc_punctiforme_PCC_73102_T1PKS-NRPS_Thioesterase
---PFFCVHPAGG-NVLCYMDLSRRLGAD----QPFYGLQAVGMDGEQPPF--------T
TIEDMATDYIAAIRTVQP--QG------PYSIGGWS-FGGIAALEIAQQLRQQ-------
GQEVNMLVLIDCPAPLSG----------------------EDLDE---------------
------ATLAAWFIQDLEGRFDLDAT-RLQQLQQLDT-AQQLNYILEQARLLHLVPPDAG
VEQVNYLFEVFKCNMRAIESYTP-RLYE------------------------------GL
ATLLRAENQPL-------------------------------ENPTNPAL----------
--------DWHKLLTN-LEVRWIPGNHYTMVREPD---------VQTLATQLRACL----
-

#Npun_R3425|gb|NC_010628.1|_Cyanobacteria_-_Nostoc_punctiforme_PCC_73102_T1PKS-NRPS_Thioesterase
---PLFFVHPVGG-NILCYYELSLHLDSD----QPFYGLQALGLNGESQPY--------T
RIEDMAAKYIEALREIQP--NG------PYFLGGWS-MGGIVAFEMATQLLRN-------
GDRVAMLAMLDSPAPVNSK----------------EIAEIDDYND---------------
------VKILVDFATDMAQSAGKNLSGSVEQLQALMTLDEQLNYFLEQARIVNLLPLDFE
LEQLRCLLKVFKSNVLALQSYTP-QVYP------------------------------NK
ILYFQASDEVS-------------------------------NEFSNPTY----------
--------IWGGLSGKPIEIITIPSNHYTIITKPH---------IQIILEYLN-------
-

#BSU03510|gb|NC_000964.3|_Firmicutes_-_Bacillus_subtilis_subsp._subtilis_str._168_NRPS_Thioesterase
---IIFAFPPVLG-YGLMYQNLSSRLPSY-K-LCAFDFIEEEDR----------------
-----LDRYADLIQKLQPEG--------PLTLFGYS-AGCSLAFEAAKKLEEQ-------
GRIVQRIIMVD---SYKKQG-V-------------SDLDGRTVESD--------------
---------VEALMNVNRDN-----EALNSEAVKHGLKQKTHAFYSYYVNLISTG-----
--------------QVKADID---------------------------------------
---------------------------------LLTSGADFDMPEWLASWEEATTG----
--------VYRVKRGFGTH--AEMLQGETLDRNA--------EILLEFLN----------
-

#BSU17220|gb|NC_000964.3|_Firmicutes_-_Bacillus_subtilis_subsp._subtilis_str._168_T2PKS-TRANSATPKS-NRPS_Thioesterase
---PVFWFHGGVG-GVEIYQQFAQKSQRP------FYGIQARGFM--------TDSAPLH
GIEQMASYYIEIIRSIQPEG--------PYDVGGYS-LGGMIAYEVTRQLQSQ-------
GLAVKSMVMIDSPYRSETKEN------------EASMKTSMLQTINTM------------
----------LASIAK-REKFTDVLISREEVDIS-LEDEEFLSELIDLAKERGLNKPDKQ
-------------IRAQAQQMMKTQRAYDLESYTVKP-----------------------
----------------LPDPETVKCYYFRNKSRSFFGDLDTYFTLSNEKEP---------
FDQAAYWEEWERQIPHFHL--VDVDS-SNHFMILTEPKA--STALLEFCEKLY-------
-

#BSU18300|gb|NC_000964.3|_Firmicutes_-_Bacillus_subtilis_subsp._subtilis_str._168_NRPS_Thioesterase
---NLFCFPPISG-FGIYFKDLALLLNEKAA-VYGFHFIEQDTR----------------
-----IEQYVNCMTDIQPEG--------PYVLLGYS-AGGNLAFEVAQAMERK-------
GLEVSDFIIVD---AYL-KEQP-------------LPIDTGNDE----------------
----------SAAYLPEAVR--------------EKVMKKKRNYQEYWAQLLNEGHIKAS
--------------IHFIEAG---------------------------------------
----------------------------------IHPETSGHTGLTKWEG--ACGN----
---------YSEYTGFGAH--KDMLEGTYAEKNA--DI--ILDILE--------------
-

#BSU31960|gb|NC_000964.3|_Firmicutes_-_Bacillus_subtilis_subsp._subtilis_str._168_NRPS_Thioesterase
---PLFCVHPAGG-LSWCYAGLMTNIGTD----YPIYGLQARGIGQREE--------LPK
TLDDMAADYIKQIRTVQPKG--------PYHLLGWS-LGGNVVQAMATQLQNQ-------
GEEVSLLVMLDAYPNHFLPIKE-----------------APDDEE--------------A
LIALLALGGYD--PDSLGEK--------------PLDFEAAIEILRRDGSALASLDE---
------------TVILNLKNTYVNS-------------VGILGSY--------------K
PKTFRGN--------------------------VLFFRSTIIP--EWFDPIE--------
------PDSWKPYINGQIEQ--IDIDCRH-KDLCQ------PEPLAQIGKVL--------
-

#BA_2372|gb|NC_003997.3|_Firmicutes_-_Bacillus_anthracis_str._Ames_NRPS_Thioesterase
---PLFCVHPAGG-LSWCYAGLMKSLGTD----YPIYGVQARGIAKNEE--------LPK
SLEEMAADYLKHIREVQPHG--------PYRLLGWS-LGGNVVHAMAAQLQNE-------
GEEVELLVMLDSYPGHFLPNTE-----------------APTEEE--------------A
LIALLALGGYD--PDNMDGK--------------PLTMESAVEILRKDGSALASLEE---
------------ETILNLKETYVNS-------------VGLLGKY--------------I
PKVYNGD--------------------------ILFFRSTVIP--DWFDPIS--------
------PNTWLNYLDGQIVQ--YDIDCRH-KDLCQ------PGPLTEIGQ----------
-

#CKL_1511|gb|NC_009706.1|_Firmicutes_-_Clostridium_kluyveri_DSM_555_NRPS-T1PKS_Thioesterase
-----ILIHGAFG-NLENFNSLATELAQQNQGDILVVGVSDVDKYLDMKP--------ID
IVPKLSDIYYEKIMKHGFKN---------VQIIGYS-FSGVVAIEIARSLLES-------
GIEIDNLSIIEGGSISEINYDELILEFVFLKAFKISVSDLKLQQIS--------------
-----ILDDIFKDSYSYENVLTVTSVLSKLRLESDREIIKNLNHKIQEERFDTYFRVLEE
KKEKILSRRSFSELYKIFKKSFEAQMYIP-------------------------------
----------------------------------DMYFGDIDYYIAQDNTGAYKHFN---
----LLLDNWRDNVIGNINKYYIPGDHYSAVQDTEN--------AKILAELLKI------
-

#METDI5676|gb|NC_012988.1|_Proteobacteria_(Alpha)_-_Methylobacterium_extorquens_DM4_NRPS_Thioesterase
------AIHHAAA-DQELYRPLSEALGAD----HPFATLQLESRVPP----------HEE
TLERLAGAYREAIDAAQPQG--------PLRLVGFC-RSGVLAFEIARQFAQG-------
GRDVALVVLIDCWEPG--------------------------------------------
------------------------------------YIRRLKPLARMRVMAAYRR-----
------------------------------------------------------------
------------------------------------------------------------
---------------GRLAALIRHVRRDGIGYLGS---------RAHL------------
-

#Ndas_0496|gb|NC_014210.1|_Actinobacteria_-_Nocardiopsis_dassonvillei_subsp._dassonvillei_DSM_43111_T1PKS_Thioesterase
--RMVCLPSLVMVSGVQEYARFGAALQG----LREVVVLPQPGFT----PGD----PLPR
TLEAALAVQARAVREVVGDE--------PYVLVSRS-SGGWVTHSVATLMEA-------G
GHAPGAVVLMDTPMPEE----P-------------TAFPIIQAGVLERE-----------
---------------------------TRFGLMDGTRVTAMGRYIGL--CADWEP-----
---------------APTAVP---------------------------------------
-----------------------------------TLAVRPGQQM-------LDASGTPI
GGRD------WRFD-WPLPHEAVDVDGDHITMLEEHGP----DTALTVHRWL--------
-

#Ndas_1030|gb|NC_014210.1|_Actinobacteria_-_Nocardiopsis_dassonvillei_subsp._dassonvillei_DSM_43111_NRPS_Thioesterase
------LVHAGTG-TLIPYRSLITEIRRRSRGQATLVGLELPDVPAFLDADP------AA
VIKRWAADYANALLERGGD---------RFHVVGYC-LGGLVATEVARTLTDA-------
GAEVASLTAISTHRPPFRLDDE--------------------------------------
-------LISEYAFAVMMGIDPVSVGFPADENRVSAASDQLLAATPG-LLPDGAIGRLTG
E--YADVA---ERFRELAKVPRQTRIER-------------------------------M
CAAVPPSAGTYTP-----------------EALNEMFAIFRQSVFAISRYEPEPYAGDVT
FLRHGG-AYPFPGNKESVTTYWERLVLGELDIVDVPGDHFSLLSVPYAPGVLKRLEDIT-
-

#Ndas_1741|gb|NC_014210.1|_Actinobacteria_-_Nocardiopsis_dassonvillei_subsp._dassonvillei_DSM_43111_T3PKS-NRPS_Thioesterase
---PLFLFPPVNG-LGWCYSSLLGHLPSD----RPVHILHDPRLETDEVLP--------L
TVAELASHHAERIRKLSSDR--------RRVLLGWS-FGGTVAQQAARELTEA-------
GEAPDRLILLDAHVGGADRTDP--------------------------------------
----------DPSPEDVCSAAFDGLVVPVGPADDRPRTPDVRAALEARGSALSSLDGP--
-------------VLERLFQIARHN-----------------------------------
---------------------------------VAAMAAHRSAGTDVPTAFVEAR-----
----------QEGDEPPATHGWADLLGSDVRVRATAVDHFALLSPRSAGSVGPL------
-

#Ndas_1761|gb|NC_014210.1|_Actinobacteria_-_Nocardiopsis_dassonvillei_subsp._dassonvillei_DSM_43111_T3PKS-NRPS_Thioesterase
----RVLVHDGTG-TLNPYRSLSPLLAADGP----LLGIAL-DGGRIDDDPP------EG
HIDRLAADYAESLLREGG----------RFHVVGYC-MGGLLATEVARNLTEA-------
GADVASLSIISSYRLPHEVRDE--------------------------------------
-------LVLEFVFARVLGADTAKLGYP-DDAVLARAFDAVLARTPG-RVPEGALARLPE
EEGLADAA---RAFRALADKGAAARFQT-------------------------------M
AEAVGPGLAG--------------------EDVAALYPVYRHSMAAVAAHRPQPYAGDAV
FLREASDTRFLPWLRQDMTRFWRDLCLGELTVQDVPGDHFSCLREPHVDTTARLLLA---
-

#RSc1811|gb|NC_003295.1|_Proteobacteria_(Beta)_-_Ralstonia_solanacearum_GMI1000_T1PKS-NRPS_Thioesterase
---TLVCVHASDG-HAAAYRPLAAVLAGT----VQCVALQSPGLEAGQAP--------LR
SVEAQAACYLAALRAGREAG---AQ--APWHVLGWS-MGAYVAVEMARQLAQA-------
GECVAQLLLVDPAPQEAMRAAAR-------------------------------------
----SEYDLLLSLAPEAVRRELAEQVGSADAFASLPPARRLAHWRAGLRLAAPSPADDDA
ALER-----MVAVLLANVTAMVDYR-----------------------------------
---------------------------------LPILDLPTVALYQASEHPAG-------
---------WGDVIAPWRDVFPRGIQAETLAGTHWS-----VVGAEVLGPVLAQ------
-

#RS05859|gb|NC_003296.1|_Proteobacteria_(Beta)_-_Ralstonia_solanacearum_GMI1000_T1PKS-NRPS_Thioesterase
---PLFLVHEITG-LDGYFTQLGAWIDAD----IPVYGLPA--VGWGEP--------QLR
TIEGLAKRLKAAMRAVQPHG--------PYRLAGWS-FGGVLAYEIAIQLIGE-------
DEEVEFLGLLDTRQPALVSGGK-------------PKWAAENR---------------PH
HAQLLELCLAYWQQRS-PGGPESAKLAGLAG---VEDFSALLERCRAQALLAPDLADVTE
-----------PDLWHVLDRIVAH---------------GDAQAN-------------YT
VFPMPLK--------------------------LHLFVAAHEQRDDEPPPHKRWLG----
---------WNAILPDTQLQR-IVVPGTHQSMVLE--------HAQALGEALSAAL----
-

#RS05859|gb|NC_003296.1|_Proteobacteria_(Beta)_-_Ralstonia_solanacearum_GMI1000_T1PKS-NRPS_Thioesterase(2)
---SIVCIPGAGD-GVVRFMHLAEALGGA----RPLYGMQPRGVDGWRVPH--------G
TVEAAAAAYVRALDAGQV--AR------GIHLIGHS-FGGWVALEMALQLQAA-------
GRAVASLTLLDCEAPGSEAG----------------------------------------
------------------------------------------------------------
---------------WLGRTYTATQVLA------------------------------KF
VEAVELA-----------------------------------------------------
--------LGRSLGIDPARLH---------------------------------------
-

#RS03122|gb|NC_003296.1|_Proteobacteria_(Beta)_-_Ralstonia_solanacearum_GMI1000_NRPS_Thioesterase
---PLFCIHPGVG-EVLVFVNLANYFVND----RPFYALRARGFNPGE--------THFQ
SFDELVRTYVTAIRKRQPQG--------PYAIVGYS-YGGPVALPVAQMLEAQ-------
GEQVAFLGSIDAPPVIKHPRGK--------------------------------------
---------VDAVESALMLAFFLSLIDRSQIDALPERLRAIQPHKDPCDYLFEIAPKERL
KELDLDLPRFKAWAALALSLSDIGQAYTP-------------------------------
------------------------------SGSVDSITVFYADPLWGSKQAYLKH-----
-------ELKRWDQLTRSPNRYIEVAGEHHTMLDP-------RHVASFQAVLR-------
-

#RS03120|gb|NC_003296.1|_Proteobacteria_(Beta)_-_Ralstonia_solanacearum_GMI1000_NRPS_Thioesterase
---AVFAIPGVGG-LAAAFAPLGTELRRHG---IELVAFDSPGWHADRTLP------IDA
RLLAYVQHVVDAIRRRTPHG--------PYQLIGHS-FGARVAFDVALALEEAG------
--GTVALTMLDALPGNDLVDMS--------------------------------------
--------RWRVGQTPRELAGWLLGAMQNGDVPAEPGEDAVASLARLQIYGDLDVHDALA
LVD---------DQMLASRRYRPAR-----------------------------------
----------------------------------RLRATRVQMVYAEHGLIG--------
-----------AHAHDAIVDSLRAWADTVAVARLDADHFSMLKAAPALAGHVMAH-----
-

#MXAN_4296|gb|NC_008095.1|_Proteobacteria_(Delta)_-_Myxococcus_xanthus_DK_1622_T1PKS-NRPS_Thioesterase
---PLFLAPPSAG-SPAVYVTLARHLDAE----QPVFGFQMPGVMDDQLPP--------E
TIEDTAALYVAALRQVQP--RG------PYRIAGWS-YGGLVVCEMARQLEAL-------
GEQVALLGLIDG------------------------------------------------
----------------------------------------AALDR---------------
---LSAHDGTPQEIPAG-------------------------------------------
-----SQLIKVLG------------------------------EAQMPRD----------
--------YASLRLIGEWMGISLP---------------------EAWADLLRRDT----
-

#MXAN_1607|gb|NC_008095.1|_Proteobacteria_(Delta)_-_Myxococcus_xanthus_DK_1622_NRPS_Thioesterase
---PFFVFHPADG-ELHYYRNLTPLLEPG----LRCYGVQAPETQSKHG---------HA
TFDARIAAYVRDIQAVQPHG--------PYRFAGYS-FGGYPALGVAAALEAQ-------
GETVELLALVDALPAVEGPQGS--------------------------------------
------AEDPVRSMAEEFGVLDAALEAELAPLDDAARWERVTALGRELGMLAPHSRAADL
R-----------RIWHVLGEVLVPQVVG--------------------------------
---------------------------------WKVPSVRARVQLFTSAPSRALHG----
------DTLGWERHLTREQLDVVPLPSSHFGTLQQP-------CVQELANHLLEVL----
-

#MXAN_2798|gb|NC_008095.1|_Proteobacteria_(Delta)_-_Myxococcus_xanthus_DK_1622_T1PKS_Thioesterase
---PFFCVHGAGG-NVLNFRELAQTLGKE----QPFYGLQARGVDGKLPPA--------D
SIEEMASIYLESIRQVQP--HG------PYLLGGYS-GGGVVAYEIAQRLHAL-------
GEPVALVAFLDTFHP-------------------------STQ-----------------
------ERRQSLHERLRELRREGAASYVSRKLR--TKVERDGTRLLSQLKLRWYEQRGEA
LPIELRNLQLTERFQALASRYVP-SPYA------------------------------GP
VTLFR-------------------------------AQEIHAIYAHMGTS----------
--------LGWEPLVPALNIREVPGDHDSLVREPN---------VHVLGRLLRE------
-

#MXAN_3618|gb|NC_008095.1|_Proteobacteria_(Delta)_-_Myxococcus_xanthus_DK_1622_NRPS-T1PKS_Thioesterase
---PFFCVHPVGG-TVFCYTELARRLGPD----QPFYGLQAQGLEGTLPPL--------E
SIDSMAASYVDAIRTLQP--QG------PYRLGGWS-LGAVIAFEMARLLHQR-------
GETVEVLALIEPSSTSLAQ----------------GVTTNDDSAA---------------
------ATMFALDLALT----AGIAS-AMTVEGAVSDPQALVERVLQEDREAGVFVPDAG
MEHFHALLRVFTANVRALQQHTLGTFP-------------------------------GS
LTVLRGSDTE---------------------------LEPSEAEDRGWS-----------
-----------RHAT-QLAVHVVQGDHYTVLRLPG---------ADALARVLTELL----
-

#MXAN_3636|gb|NC_008095.1|_Proteobacteria_(Delta)_-_Myxococcus_xanthus_DK_1622_NRPS-T1PKS_Thioesterase
---PVFCVHPVSG-NVLPYLELSRRLGPD----QPFYAFQAPGLEGERAPL--------G
TVEAMASTYVEAMRGVQA--SG------PYRLAGWS-LGGVVAFEMARQLEQQ-------
GEQVEQLTLIDAYAFDQR-----------------PVEPVGAEWI---------------
------AARFVEFTGQL----LGLPLSELIADAHPADEASLLDRLLELGRRTGVLAQGVG
SEQLHALYRVYESNLRALWDYQPGRYG-------------------------------GR
VTLLRASET----------------------------RVPTG-TDGGWG-----------
-----------ALAAGGVEVHELSGDHHSILRAPA---------VDVIAETMA-------
-

#MXAN_3779|gb|NC_008095.1|_Proteobacteria_(Delta)_-_Myxococcus_xanthus_DK_1622_T1PKS-NRPS_Thioesterase
---PFFCVHPVGG-NVLAYAELARLLGPE----RPFYGLQAQGLDGSTPPL--------G
TVEEMAAAYVEAIRTVQP--AG------PYLLGGWS-VGGVIAYEMARQLRER-------
GDTVALLALIDAYTPAVLN----------------AAEPEPD--A---------------
------AQVVSAFASDL----LGIGFTDLATPDASLSPEAQVEALWEAGQRAGALPPGME
PAHLRALLQVFEANLWAARRYQPPALNP------------------------------GR
VLRLQATEG----------------------------AEGLP-EDGGWK-----------
-----------ALVGTGLEQHAVSGDHYSVLRAPG---------VRELADRLRSAL----
-

#MXAN_4000|gb|NC_008095.1|_Proteobacteria_(Delta)_-_Myxococcus_xanthus_DK_1622_NRPS-T1PKS_Thioesterase
---PVFFVHAVGG-AVGPYRALARRMGRE----RPLYGFQAAGLDGREPPL--------E
QVEALARRYVEAMRERQP--EG------PYVLGGWS-LGGVVAFEMARELERL-------
GQSVALLVLLDSFAPDENA----------------PTREPDAALL---------------
------LAGMAMDLART----AGVESTLRPEMLSGLTEEEQFTALVEHARQAGWLPPEVE
ASTLRAWRDVTRANLRALAAYRPGPVR-------------------------------CP
VLLLRAKDAQ---------------------------RSRAVEPSHGWA-----------
-----------RWGLSGLTVEDVPGDHYSVLREPQ---------VETLARRLVEH-----
-

#MXAN_4079|gb|NC_008095.1|_Proteobacteria_(Delta)_-_Myxococcus_xanthus_DK_1622_T1PKS-NRPS_Thioesterase
----VLYLVPGGGSTPFYLLSLARHLEG-----VAVFGLQPQGLDGDVPP--------HE
TVEAIATWYADAILAMQPEG--------PYSVGGHS-MGGHIAYELAQELKAR-------
GREVGVVAMLDTLAPFPDVTRPQGE-----------------------------------
---GWDTAQWMLHLAGIMEAFFNVKIDLALPEVRAMGEAERLQFFVARLQAAAVLPEGAQ
PVHVQGILNVARAHDALNYRPRRGQPVP--------------------------------
---------------------------------LAVFRAEDRSGPSTAALDALVQDG---
--------TLGWSQLTQQACSAYPVPGTHLSLLRDP-------HAAVLAQHLLALI----
-

#sce0345|gb|NC_010162.1|_Proteobacteria_(Delta)_-_Sorangium_cellulosum_So_ce_56_T1PKS-NRPS_Thioesterase
---PLFLVQPIGG-TIFIYRELARQMGAE----LSIYGIRASGMEPGEPVFT--------
EIPAMAARYVQELRAVQP--EG------PYLLGGHS-AGGVIAYEMAQQLLAE-------
GKK-AQLLLLDTGSLA--------------------------------------------
--------------------------AVRGASIES-ADDVLRQLIGLKDAAPKAYQGFVA
ALQEDAPFRAIVLSTWRAMTLYEPRPTE------------------------------AS
VLFVSAREQLDA-------------------------SGSDDVDYWRDLT----------
----------RGRFVTHQVPGNHFTMMEPPQVASV---------ARVVRAHI--------
-

#sce6823|gb|NC_010162.1|_Proteobacteria_(Delta)_-_Sorangium_cellulosum_So_ce_56_T1PKS-NRPS_Thioesterase
---PLFLIPPLGG-TVHLYRPLVQRLGGE----QPVHGIQPTGADPSEPGFM-----SAM
SVPAIAARYVEEILSVRP--EG------PYLLGGHS-AGGVVAYEMAQQLLAQ-------
GRKVALLLLLDTG-----------------------------------------------
--------------------------SVQGASDRSPASALAHEMAKIQAIASQRYRGFVA
AMEDDARLRAEVTSTWQALASYAPQPTD------------------------------AS
VLFLRAREQISP-------------------------EDAVAVHAWMDLA----------
----------RGEFALQVVPGNHFTMLDPPHVAHV---------ACAIQQRI--------
-

#sce8255|gb|NC_010162.1|_Proteobacteria_(Delta)_-_Sorangium_cellulosum_So_ce_56_NRPS-T1PKS_Thioesterase
---PLFCVDPTGL-HVMVYRGLAAAMSEE----QPVLGLDLGPSLAGEAT--------AL
SLPRIVERLSREIRERQPRG--------PYRLLGWS-VGGVLALAVARALEQQ-------
GERVAFLGMLDAQPRTQLYAAG-----------EPDVVEELAAYID--------------
-------QGRSAELLALAPAERDALRERLAGLSDGERVAEAVRWAQARGFASSDIPPAAY
HHR------YALLRGAALLAKDLPP-----------------------------------
----------------------------------RSVAAPIHAWWSTETIELHGGP----
--------PMDWQQFTAGAARSAILPGDHLAAVQG------PDVHVHVRAAL--------
-

#sce2387|gb|NC_010162.1|_Proteobacteria_(Delta)_-_Sorangium_cellulosum_So_ce_56_NRPS_Thioesterase
---PFFCVHPVGG-NVLCYRELARQLGAE----QPFYGLQSPGLDGAQAPP--------A
SVEEMAALYVSAVRSVQP--SG------PYLLGGWS-MGGVVAFEMARQLERS-------
EQRVEVLALIDAQVEGVR-----------------PGAP---------------------
----------------------------------PADADHLLHTLFDHDLARVAGGSPPP
EEALPALRRVFMSNMKALYGYDPGPYG-------------------------------GT
ITVFQAIDG----------------------------RASSPDAVDAWR-----------
-----------RLAPSGVEVERVRGDHYSILQAPG---------VEPVARKLRALI----
-

#sce3193|gb|NC_010162.1|_Proteobacteria_(Delta)_-_Sorangium_cellulosum_So_ce_56_T2PKS-TRANSATPKS_Thioesterase
---PVFWFHGSLG-TVQTYLGLSRGLGPT----LPFYAVQSRGVKANEEP--------ID
DLSEMAKYYAEILLAARGGAG------AAFQLGGYS-EGGLIAYEVTRHLQRM-------
GHDVRSLVMIDTPYLHGGVHLLK------------DEDTRKLR-----------------
--------YAMVYANILMINKLGGFTDIGALPLQGASAEDVLPLLVRHGLERGLPYSPDE
LRETIERFHRIAEANERAAESYEIADLPR-------------------------------
----------------------------PGAVECHYFQRRTAGVYFDPSRFAGAMVERTN
DYFRDKGCAEAWMRRLPRFSLHLTSATDHFSLLSEADP---FERIRDTCRRLY-------
-

#sce4133|gb|NC_010162.1|_Proteobacteria_(Delta)_-_Sorangium_cellulosum_So_ce_56_TRANSATPKS-NRPS-T1PKS_Thioesterase
----SFWCHGALG-FGQIFRPLSAALGED----YPVYALQARGVDGTRLPF--------H
RLEDMLTHYVACIRSVQP--RG------PYCIGGYS-SGGILALELARELHRQ-------
GETVARVILLDTYPSTPEVQRW-------------FAGFMDDDYL---------------
------HVAVAAMLFAPGR--ADGLVSVEELQGTPPEVRLGHLASLLAERLGAGWSRDEI
YILLQGAVNVARYTGQALHGYEPSRYNA------------------------------SD
VLYFRAAAGFVDP----------------GRAGSGLTRGVGPDAPDHVAP----------
---------WRDIVASRLDVVSVPADHFSLLSGPG---------LAVIKEHL--------
-

#b0586|gb|NC_000913.2|_Proteobacteria_(Gamma)_-_Escherichia_coli_str._K-12_substr._MG1655_NRPS_Thioesterase
---TLFCFHPASG-FAWQFSVLSRYLDPQ----WSIIGIQSPRPN--GPMQT------AA
NLDEVCEAHLATLLEQQPHG--------PYYLLGYS-LGGTLAQGIAARLRAR-------
GEQVAFLGLLDTWPPETQNWQE-------------K------------------------
------------EANGLDPE-------------------VLAEINREREAFLAAQQGSTS
-----------TELFTTIEGNYADAVR------------LLTTAH---------------
SVPFDGK--------------------------ATLFVAERTLQEGMS----PER-----
--------AWSPWIAELD---IYRQDCAHVDIIS-------PGTFEKIGPIIRAT-----
-

#ROP_02580|gb|NC_012522.1|_Actinobacteria_-_Rhodococcus_opacus_B4_NRPS_Thioesterase
---PLFCIHPGIG-LSWGYAGLLQHLSPD----RPAFGLQLPIISG-GT--------AVD
SIEQLAHRYVLEMRKVQAHG--------PYHLLGWS-LGGVIAHAMAVELRRE-------
GEAVDTLALMDS--YVA-NGTE-------------Q------------------------
---GPETLTVAELLHGLGLDLES-V-----SGEELTY-ERAVELLDDAFGQKTGLTPR--
-------------HLERISAGFTNS-------------SRIMNNF--------------R
PQVFDGD--------------------------LLFFTAAG--SASTGEH-SPEE-----
---------WRDSVTGGIREV--KIECEH-NQMIE------PEVLAVVGPV---------
-

#ROP_02610|gb|NC_012522.1|_Actinobacteria_-_Rhodococcus_opacus_B4_NRPS_Thioesterase
---PVFCVHPFIG-LAWSYAGLSRELTED----RPIYGLQSPALTEAEP--------HPG
TITDFADRYVREIRSIQPHG--------PYHLVGWS-LGGVIAHEMAVQLQEA-------
GEEVRLLGLLDS--YVG--LDR-------------S------------------------
---VENTATTADLLGGAGLDLPEDGVLDELSPDGQFDAERAAALLRVVGGPLAALTAP--
-------------ELDRIYRNAQQA-------------PDLIDAH--------------R
PRVFDGE--------------------------LVFFTAALDDG---FHVDPVTC-----
---------WGPYVRGRIDEH--PVDATH-WTMTT------PDALAAIAPHLARTQ----
-

#ROP_51630|gb|NC_012522.1|_Actinobacteria_-_Rhodococcus_opacus_B4_NRPS_Thioesterase
---PLFCVHPGIG-LSWGYAGLVRYLPAD----RRAFGLQLPTISG-DG--------EYR
SIEQLAHRYVEELKAIQPQG--------PYDLLGWS-LGGVIAHAMAVELQRA-------
GDDVATLAVMDS--YPD-NGED-------------P------------------------
---LFGKLDLRDLLRGLGLVVA--------TDSDLTY-ERAAQLLNESWGGDSGLRGE--
-------------HLERINAGYENS-------------RELVHRF--------------E
PQVYDGD--------------------------LLIFPATGDDDGTTRAR-SADE-----
---------WRPLVTGRIAEY--PVDCGH-NDMIE------PQSLAVIGPVLSR------
-

#ROP_51640|gb|NC_012522.1|_Actinobacteria_-_Rhodococcus_opacus_B4_NRPS_Thioesterase
---PLFCVHPGIG-LSWGYAGLVQYLPPD----RPAYGLQLPTISG-DG--------DYR
TIEQLAHRYLDEMRAIQPTG--------PYDLLGWS-LGGVIAHAMAVELQAS-------
GEQVGTLAVMDS--YPV-GGEE-------------P------------------------
---PSGRLDIRDLLRGLGLQAD--------PDAEMTY-EHAARLIDESFGTETGVRGR--
-------------DLERISAGYENS-------------RWLAHHF--------------V
PRAYDGD--------------------------LLIFSATGDGDGTTRAR-SADE-----
---------WRPLVTGRIDAR--PVDCGH-NDMIE------PQSLAVIGPVLS-------
-

#ROP_54870|gb|NC_012522.1|_Actinobacteria_-_Rhodococcus_opacus_B4_NRPS_Thioesterase
---PLFCIHPIVG-LAWCYTGLASRIDPD----RPIYGLQSPAIAGDDS--------LPA
SIDALAARYVAEIRGIQAQG--------PYDLLGWS-LGGVLAHAVAVQLQDA-------
GDEVATLVMLDS-YAHQPHAAE--------------------------------------
---TDVPVSVGDLLAGIG------VEAEVPAAVVDMTPESALDLLAAPGGPTAVLNRE--
-------------QLQALIASAAHQ-------------CALLEHH--------------R
PGVFRGD--------------------------VAFFTAGRDDP---TGSEAAAT-----
---------WQPYVAGAVRNR--TVDSAH-WHMTS------PRVLRLVGSAL--------
-

#ROP_55220|gb|NC_012522.1|_Actinobacteria_-_Rhodococcus_opacus_B4_NRPS_Thioesterase
---PLFCVHPLSG-LAWCFSGLADHVG-D----RPLYGIQATGVPD-----------LPG
TLSALAARYVDAIRVVQPDG--------PYHLLGWS-LGGTVAHEMAVQLRES-------
GHEVAAPALLDTLLPQH---LP-------------P------------------------
---EPETLTEDELIAQFG----------------------------------SYVSAD--
-------------RLREIRALIERL-------------ELIASTH--------------S
PRRFDGN--------------------------LDLFVAARDLD---RHPDVVDA-----
---------WREHAGGVVTAH--HIDTTH-SEMAD------PGPLAEIGRL---------
-

#ROP_04690|gb|NC_012522.1|_Actinobacteria_-_Rhodococcus_opacus_B4_NRPS_Thioesterase
---PVFCIHPAIG-LAWCFTGLVQYLG-D----RPVYGLQSPALTDPDL--------RID
SLQELAGRYVDRIRSVQPHG--------PYHLVGYS-VGGQIAHEMAVQLTGA-------
GDEVATLTMLDT--HLAGGLDR-------------T------------------------
---AEK-PTMAALLAEFGAVVPRDG-------DDATTTERAVEVLRRTGGPFAAVTAD--
-------------DLDAVHRVFTQT-------------VDLALAH--------------R
PSTPSGV--------------------------DLLYFGAADSV---DAPTGVSA-----
---------WRQHITGEILVH--HVPAAH-QQMTS------PEALAGIG-----------
-

#ROP_19210|gb|NC_012522.1|_Actinobacteria_-_Rhodococcus_opacus_B4_NRPS-T1PKS_Thioesterase
---ALFCVHPAGG-LALGYAGLIRHLSPD----RPVYGLQLPILSG-GT--------TFE
SMEQLAHRYVVEMRAVQPRG--------PYHLIGWS-LGGVIAQAIAVELRES-------
GAEVGTLAMMDS--YVA-EGDD-------------F------------------------
---GDLEVNAEEWLHGLGVEFEG-G-----DDAGPSYREQLLDMLGRSFGRDPAFAST--
-------------LLGRISTGLENS-------------KQISTGY--------------R
PRVFDGD--------------------------LLFFSAAQAADGEEGERPSPGV-----
---------WQPVITGLIVEN--KVECDH-LRMTT------PEALAVIGPILEN------
-

#ROP_20370|gb|NC_012522.1|_Actinobacteria_-_Rhodococcus_opacus_B4_NRPS_Thioesterase
---PVFCFHPAGG-ISWGYSGLLRHIDPD----YPLYGVQASNLSTSKR--------PPE
TLEDMAAEYIEHMRTVQPTG--------PYHLLGWS-LGGVVAHAIAGALQNQ-------
GEELGMLVMLDSFPSDAWAS-------------------MPTEQD--------------A
LAALLYMVGYD--PEPLIAD--------------GLTRQQVIDILRGEGSALAGINE---
------------HTPAAMIDNFANA-------------VRLESEP--------------S
QIVVDSD--------------------------MLFFTAARNP--ATAATY---------
-------DLWRPYLTGTIVN--HDLDCEH-KDMTQ------PRWIGEVGS----------
-

#ROP_21090|gb|NC_012522.1|_Actinobacteria_-_Rhodococcus_opacus_B4_NRPS_Thioesterase
---PLFCIHPAVG-LAWCYSGLSAYLRPD----RAVWGVQSPAVTAGGE--------RFT
TITERAARYVQEIRRVQPRG--------PYHLLGYS-AGGVIAHAMAVELRSC-------
GEEVGVLAMIDS--YAS-AER---------------------------------------
---DTPVPTLPELLAEFD---GAAA--------EQLGP-------------------E--
-------------QLARLYEDYVDV-------------VDAAADF--------------V
PERFDGS--------------------------LLFFGAAG-------PPAACAT-----
---------WRPWIGGEVFAH--TIDRPH-AQMTD------PEALAVIGPILA-------
-

#ROP_33190|gb|NC_012522.1|_Actinobacteria_-_Rhodococcus_opacus_B4_NRPS_Thioesterase
---PLFWIHPISG-LSWCYTGFAEHLDEN----RPVFGIQTPAVVG-ET--------LPD
SIEALAARYLAEVRRIQPEG--------PYDLAGWS-IGGVIAHAMAVQLQAA-------
GQAVGSLVMLDS-FAETQQSRD--------------------------------------
---TGDATVAGE-------------DEDTAAALSALSPDHA--------------DR---
-----------------LTAAAHHN-------------AGLMRDY--------------R
PGLFDGD--------------------------VLFFTAAHDDP---SLRRAVGT-----
---------WRPWVNGRITNH--PVESTH-WQITE------PAAVRVIGPLL--------
-

#ROP_39430|gb|NC_012522.1|_Actinobacteria_-_Rhodococcus_opacus_B4_T1PKS_Thioesterase
---PVFVFHPAGG-STVAYEPLLKRLPEG----TPMYGFERTEG----------------
PIDVRAAEYLPLIREIQG--DG------PYVLYGWS-LGGVLAYAVAKLLRES-------
GADVRIVGLIDT------------------------------------------------
--------------------------VMAGEKVEDTPDEIRKRWQRYAAFAKKTYNVDYP
-LPYDKLA--AAESDEEQIKILTELLKL------------------------------SG
TKIPGGIIEHQR-------------------------TSWLDNRAIQTAE----------
----------LEQYDGDVVLYMADRYHDDVMNLEP---------AFKTRKPDGGWGDAVK
N

#PA2302|gb|NC_002516.2|_Proteobacteria_(Gamma)_-_Pseudomonas_aeruginosa_PAO1_NRPS_Thioesterase
---RLIALPPAGG-NAGTFRGWDARLPAD----VELLAIQYPGRQERQDEP------FVT
DVEAMLCAIDDALLPLLDR---------PFALIGAS-LGGMLAYELAARLESLH------
GLRARQLFVISSRAPGPDLEYP--------------------------------------
---------------------------RFHAMGDAELLRTLREYDVLPLEVLDDPELREI
S-----------LATLRADSRLAADYR---------------------------------
------------------------------------YRPREPLAIPITAILGE-------
---------QDPGVSRVAIDGWRRHASRYELETLAGGHGLVVTAAEEVCAILRQRL----
-

#PA3327|gb|NC_002516.2|_Proteobacteria_(Gamma)_-_Pseudomonas_aeruginosa_PAO1_NRPS_Thioesterase
---PLFLVHPLGG-HVLCYLPLVRALPPD----QPVYALQAAGTGQGSTP--------LA
VLEDIAASYLAAIRRVQPEG--------PYYLGGWS-FGGFVAYEMARQLRAL------D
PQAVAQLIVLDSITVDRNHAGS-------------ASDE-------------------AL
LLFFYWELVWFERSDKEVEPLPEGA-------SLEQKLDHIVERAIEAGVLPAGTP----
-----------RATVQRLYELFRAS-------------WQALIGY--------------R
PEVSDQDMTLLRAD----------------GPLPLALKPMHDAAGTHYGDP---------
------KNGWQHWTSGRLDVI---DVPGDHLVLMK------EPYVETVAAEIAALL----
-

#PA4225|gb|NC_002516.2|_Proteobacteria_(Gamma)_-_Pseudomonas_aeruginosa_PAO1_NRPS_Thioesterase
-----VLVHEGLG-TLLPYRPLLRALGEGRP----LLGLAVHDSDAYLAIPA------EH
LNACLGRRYAEALHRAGLR---------EVDLLGYC-SGGLVALETAKSLVQR-------
GVRVRQLDIVSSYRIPYRVDDE--------------------------------------
-------RLLLFSFAATLGLDTAALGFP-APERLGQAVQAALAQTPERLVAEALAG----
-------------LPGLADLVALRGRVL-------------------------------Q
AASGSADAVSVER--------------------DTLYRLFCHSVRASQAEAPEPYVGALR
LFVPDAGNPLVPRYAEALETQWRAAALGACGIHEVPGGHFDCLGEALAQSLSKP------
-

#lpg2179|gb|NC_002942.5|_Proteobacteria_(Gamma)_-_Legionella_pneumophila_subsp._pneumophila_str._Philadelphia_1_NRPS-T1PKS_Thioesterase
---PLFLVHPIGG-SVFWYKLLGQYFDKD----RPLYGIQDPGLDRNELIF--------S
NLEEMASAYVHSIQAIQP--SG------PYILGGAS-FGCTVAIEMAKQLEEK-------
GETVISIISLDG------------------------------------------------
-------------------------WAFYPSLQNNELYFQEVMKEQNSRILKKYIEN--N
VSNSKFLLELQWHRENMLTQYKM-PIIK------------------------------PK
FILFKAK------------------------------KLTEMFQYNASLN----------
--------WWENYTSQPIELHLTPGDHESMFYEPN---------IKILATKLNDSL----
-

#YPO0776|gb|NC_003143.1|_Proteobacteria_(Gamma)_-_Yersinia_pestis_CO92_NRPS_Thioesterase
---PVVILHEGSG-TVLPYLSLVDKLS--GP----IYGVNVTDSAAFLSIPA------ER
LICQLASTYLPEIQKVGD----------QCHLVGYC-MGGLLAFEIARQALEN-------
GRPVSSLTIISSYQIPYHINDP--------------------------------------
-------LMIDLVMSWTLGVEPP---WNLLKADLEGIYHAILADKPAVITVNAVVERAKA
NGLTALAN----EYACLQQQSNEVRLSQ-------------------------------L
LTAIEQHSTASSH------------------VSRQPFDVFRHSIQGVCQYQPNYFAGDMT
FVCQQGDTYLLPALQQDMTAFWQTYCLGQINRLTLPGDHFTCLSADNISPLIQHLEQC--
-

#YPO1910|gb|NC_003143.1|_Proteobacteria_(Gamma)_-_Yersinia_pestis_CO92_NRPS-T1PKS_Thioesterase
---TLFVFHASDG-DISAWLPLASALN------RRVFGLQAK----SPQR--------FA
TLDQMIDEYVGCIRRQQPHG--------PYVLAGWS-YGAFLAAGAAQRLYAK------G
EQ--VRMVLID--PVCRQDFCC-------------ENRA-------------------AL
LRLLAEGQTPLALPEHFDQQTPD------------SQLADFISLAKTAGMVSQNLT----
-----------LQAAETWLDNIAHL-------------LRLLTEH--------------T
PGES--------------------------VPVPCLMVYAAGRP-ARWTPA---------
------ETEWQGWINNADDAV---IEASHWQIMME------APHVQACAQHITRWL----
-

#STY0631|gb|NC_003198.1|_Proteobacteria_(Gamma)_-_Salmonella_enterica_subsp._enterica_serovar_Typhi_str._CT18_NRPS_Thioesterase
---TLFCFHPASG-FAWQFSVLSRYLSPS----WSIMGIQSPRPV--GPMQI------AT
TLDEVCEHHLATLLARQPHG--------PYYLLGYS-LGGTLAQGIAARLRAR-------
GETVAFLGLLDTWPPETQNWRG-------------K------------------------
------------EANGLNPD-------------------VLAEIERERAAFVAAQQGNAS
-----------DALFTAIEGNYADAVR------------LLTTAH---------------
SAPFDGH--------------------------ATLFVADKTVPEDVS----PEQ-----
--------SWSPWIASLA---IYRQPCAHVDIIS-------PSAFETIGPIISELI----
-

#PSPTO_2150|gb|NC_004578.1|_Proteobacteria_(Gamma)_-_Pseudomonas_syringae_pv._tomato_str._DC3000_NRPS_Thioesterase
---PLICLPPGGG-GTYSYYPLAGQLSDS----RPVYGLVNKAYVVPG--------WFDT
SWQEMVAYYVEQIRTTQPQG--------PYNLLGWS-MGGALAIEVAHVLERE-------
GDTVSFLGLVDTQLPAS-------------------------------------------
-----------------------------------LAMEWVEEAPEVTTQKQGEN-----
------------------------------------------------------------
------------------------------------------------------------
---------YYRSLIKSLQAFVPGLQEASIVGLIDTAR----HSVASEGEVI--------
-

#PSPTO_2600|gb|NC_004578.1|_Proteobacteria_(Gamma)_-_Pseudomonas_syringae_pv._tomato_str._DC3000_NRPS-T1PKS_Thioesterase
---SLFVFHASDG-EVSAYLPLAQALD------MQVFGLQAT----NALG--------SA
SLKALAAQYEQAIRRQQASG--------PYVLLGWS-YGTFVAEETARLLLRQ------G
EQ--VRLILLD--PVCRADLRF-------------DDRP-------------------GL
LRLMAEGAKSIALPDDLEQLPAA------------EQLNVFMNNATQAGVLKNPPQ----
-----------AQQAEQWLQRIEHL-------------MTLLAQH--------------S
QPRQ--------------------------LDLPCLWLSAEGRP-QHWLPA---------
------EQDWQEWAATARRES---MPCDHWQLLLD------SDQVQRTAASISAWL----
-

#PSPTO_2830|gb|NC_004578.1|_Proteobacteria_(Gamma)_-_Pseudomonas_syringae_pv._tomato_str._DC3000_NRPS_Thioesterase
---ALFLIHDFTG-LDAYFPVLGQHLQGD----FPIYGLPG--IGLGQQ--------QLR
TLECLAARLVERIRQVQPRG--------PYRLAGWS-FGGVLAYEVATQLLGM-------
DEAVTFLGLIDSYVPRLTDQGK-------------ARWQGPD----------------LL
ERQLLSHCIAHWQVQDETGSTALARLHSLGEQAALPDFETLLQLCRDEQLLYEELAQADD
-----------RQLRHYLEREVAH---------------GHALAH-------------YQ
VEPLSLP--------------------------IHLFCAD--QRPMAPPGASATLG----
---------WAEILPKGALQC-VSVPGDHMSMMQAP-------HVNTLGQRIGQAL----
-

#PSPTO_2830|gb|NC_004578.1|_Proteobacteria_(Gamma)_-_Pseudomonas_syringae_pv._tomato_str._DC3000_NRPS_Thioesterase(2)
---PLFCVPGAGD-SVTSFIGLAEALGPD----WPIYGLQPRGLDGRSVPH--------S
RVEAAAQSHVLAIEAMYP--QG------PLHLVGHS-FGGWAAHAMAVKLQAR-------
GREVASLTLIDSEAPGGDG-----------------------------------------
------------------------------------------------------------
---------------LSSKPYTATAALE------------------------------RL
IEALQLS-----------------------------------------------------
--------SGKSLELDPLTFADCDGDTQLHLLQSA---------MVRIGLLPQRLAPQ--
-

#PSPTO_4519|gb|NC_004578.1|_Proteobacteria_(Gamma)_-_Pseudomonas_syringae_pv._tomato_str._DC3000_NRPS_Thioesterase
---HLFLVHAVGG-VVSPYIKLSQLMPDD----VSVHAFQAGGLEHG--------TDVVD
TLEKMAAIYIEQMLEIQPEG--------PYWLGGWS-MGGVIAFEMARQLEAL-------
DREVRQLLLIDAPAPGHAAQEQ--------------------------------------
------------TWPLGAYLMDMARSLSVDLPLSASEMNQLIEHPDRDVLAIATMRRIG-
------------VIPDSMDDQQVSRR----------------------------------
---------------------------------LQIFCTHQQALEAYRPKTGINSN----
------LTLLHTEESAELRDKWRPLCGQSFNATGFTADH--YSILEAATPCISKLF----
-

#ABO_1784|gb|NC_008260.1|_Proteobacteria_(Gamma)_-_Alcanivorax_borkumensis_SK2_NRPS_Thioesterase
---PLFCIHPVIG-LSWSYSGLTRYLDKE----QQLYGVQARGLATEPQQHGAAGLGLPT
SITEMAGEYIEQLRRVQPAG--------PYKLLGWS-LGGLVAHEIARLLEAE-------
GEEIGYLAVLDSYPYVQQPA-Q-------------LADEAQLVQS---------------
---ALTFMGLASDSLPQGEE----------------SMANLSDLLCREYDIHNLPFVK--
-------------EMQQSNGNIIES-------------VRLIIENNLVISRQ------FT
PGKIKAA--------------------------MLFIAATETVETDMVDVLHN-------
-----SADIWQEYVG-KLTIH--HVDCHH-QDMFD------APALTKTGPLIAD------
-

#ABO_2092|gb|NC_008260.1|_Proteobacteria_(Gamma)_-_Alcanivorax_borkumensis_SK2_NRPS_Thioesterase
---VLWCPHPVTG-RTTGYQALAASLEGQ----WQVRGLQSRSFLESG--------WFDP
SLSEMVERYYRTVRQAQPEG--------PYYLLGWS-MGGAMSMELAHRLEQA-------
GEEVAFVGLLDTYVPGHEVPED--------------------------------------
-----------QWSSPQAQQTLRAHLGMLLTCAPATALDDCMARLRDSKPAQWPQNFTQW
LATQSIEAAVADSAAQLLHAWAVEQHLR--------------------------------
----------------------------------DLCWGYQLPALHTPVHS---------
--------WWASEPAGRAQALQRGLALCAELAHTETVSADHLTIVREPSLLQGL------
-

#RHA1_ro05102|gb|NC_008268.1|_Actinobacteria_-_Rhodococcus_jostii_RHA1_NRPS_Thioesterase
---PLFCVHPGIG-LSWGYAGLVRYLPAD----RRAYGLQLPTISG-DG--------DYR
SIEQLAHRYVEEMKAIQPEG--------PYDLLGWS-LGGVIAHAMAVELQHA-------
GDDVASLTVMDS--YPD-NGED-------------P------------------------
---LFGKLDMRDLLRGLGLVVA--------NDGDLTY-ERAAQLLNESWGSDSGLRGE--
-------------HLERINAGYENS-------------RNLVHRF--------------E
PQVYDGE--------------------------LLIFPATGDDDGTTRAR-SADE-----
---------WRPLVTGRIVEH--RVDCGH-NDMIE------PQSLAVIGPVLSR------
-

#RHA1_ro05103|gb|NC_008268.1|_Actinobacteria_-_Rhodococcus_jostii_RHA1_NRPS_Thioesterase
---PLFCVHPGIG-LSWGYAGLVRYLPPD----RPAYGLQLPTISD-DG--------DYR
TIEQLAHRYIEEMQAIQPTG--------PYDLLGWS-LGGVIAHAMAVELQAA-------
GEEVATLAVMDS--YPV-GGED-------------P------------------------
---PADRLEIRDLLRGLGLQAE--------GDGEMTY-EHAARLIDESFGTETGVRGH--
-------------DLERIAAGYESS-------------RWLAHHF--------------V
PRVYDGD--------------------------LLIFPATRDGNGTTRAR-SADE-----
---------WRPLVTGRIDEQ--PVDCGH-NEMIE------PQSLAVIGPVLS-------
-

#RHA1_ro05452|gb|NC_008268.1|_Actinobacteria_-_Rhodococcus_jostii_RHA1_NRPS_Thioesterase
---PLFCIHPAAG-IAWCYAGLAEHLP-G----HVLYGVQATGATD-----------LPS
SVAELAARHIDAIRAVQPAG--------PYHLLGWS-LGGTVAQEMAVQLHEA-------
GHEVATLAMLDTLLPEHRAALV-------------N------------------------
---LGDNRPELDLPAELG----------------------------------AAVSAD--
-------------RVQSLGELLIRL-------------EQIASTH--------------Q
PRHFDGD--------------------------AVFFTAAYDLD---HHPELVPD-----
---------WRTHFGGDVTEH--RIDAVH-ADMVG------RVPVSVIGRRLR-------
-

#RHA1_ro05468|gb|NC_008268.1|_Actinobacteria_-_Rhodococcus_jostii_RHA1_NRPS_Thioesterase
---PLFCIHPIVG-LSWCYSGLRQYIDSD----LPIYGIQSPSILEDSY--------LPE
SLDELADRYIREIRRIRPSG--------PYRLLGWS-LGGVIAHAMAIRIQAA-------
GEGVELLAMMDS-FAGATAVEE-------------G------------------------
---SPTDVSVSELLGGFG------IEETAVERISDPSLGGVAVALAEMSGHSVEQAVK--
-------------VVGRLVSAADRN-------------SRLMSEY--------------R
PACFDGD--------------------------IVFFTAAADDA---TGARAARG-----
---------WENAVTGVVHNH--AVAVTH-WQMTS------PDALAVVGPILNE------
-

#RHA1_ro06664|gb|NC_008268.1|_Actinobacteria_-_Rhodococcus_jostii_RHA1_NRPS_Thioesterase
---PIFCIHPASG-LAWCYAGLAPHIEPG----RRIYGLQSPELVEDDP--------HPR
SIEQLAEQYVREIQAVQSDG--------PYRLLGWS-LGGVIAHAVATRLRLL-------
GKQVSMLAMLDS---RFREAES-------------T------------------------
---ANQEFTVEDILVELADLFGFGAE-DFDAAGETMSAEQATELIHLRTGAFEFLQPS--
-------------HVKRIVESFNDA-------------PRLVADY--------------R
PVVFDGD--------------------------MVFFAAAAGEM---TQEIAESC-----
---------WNPYITGSIDYY--PIDATH-IRMTT------PRALAEIARVLNTYL----
-

#RHA1_ro00141|gb|NC_008268.1|_Actinobacteria_-_Rhodococcus_jostii_RHA1_NRPS_Thioesterase
---PLFCIHPGIG-LSWGYAGLLQHLSQD----RPAFGLQLPIISG-GP--------SFE
SIEQLAHQYVLEMRKVQAHG--------PYHLLGWS-LGGVIAHAMAVELRRE-------
GEAVDTLAVMDS--YVT-GGTD-------------Q------------------------
---GPESLTVPELLHGLGLDLES-V-----SGEELTY-ERAVELLDDAFGQKTGLTPQ--
-------------HLERISAGFTNS-------------SRIMNNF--------------R
PQVFDGD--------------------------LLFFTAAG--SASTDQH-SPEE-----
---------WRSSVTGGIREV--KIECEH-NQMIE------PEVLAVVGPVL--------
-

#RHA1_ro00144|gb|NC_008268.1|_Actinobacteria_-_Rhodococcus_jostii_RHA1_NRPS_Thioesterase
---PLFCVHPFIG-LAWSYAGLGRELTQD----RPIYGLQSPALTEDEP--------HLE
TITDFAARYVREIRSIQPHG--------PYHLVGWS-LGGVIAHEMGVQLQDA-------
GEEVRLLGLLDS--YVG--IDR-------------S------------------------
---VENSATTADLLGGVGLDLPDDSVLDELAPDGQFDAERAAALLRVVGGPLAALTAT--
-------------ELERIYGNALRA-------------PALIDAH--------------R
PRVFDGE--------------------------LVFFTAALDDG---FHVDPVTC-----
---------WGQFVRGSIDEH--PVDATH-WTMTT------PDALAAIAPHLERSH----
-

#RHA1_ro00232|gb|NC_008268.1|_Actinobacteria_-_Rhodococcus_jostii_RHA1_NRPS_Thioesterase
---PLFCVHAGMG-LAWAYTGMVRHLSPD----RPVWGLQLPSLGG-GP--------EYD
SIEDLAHRYLDEVRAVQPAG--------PYHLLGWS-LGGLIAHAMATELQDR-------
GEEVASLVLLDS--YAG-EPIA-------------E------------------------
----PDPLDVGDLLRGLGVDVGPGA-----NSRPLRY-SDASDRLREAYGPAAAMTAD--
-------------QLRRIAEGYDRS-------------TRLAARF--------------A
PRVFRGD--------------------------ALLLIAEDG---------PHDG-----
---------WGDSITGTVQEE--HVDCGH-NDMMQ------PKPARAIGMLVE-------
-

#RHA1_ro00433|gb|NC_008268.1|_Actinobacteria_-_Rhodococcus_jostii_RHA1_NRPS_Thioesterase
---PVFCIHPAIG-LAWCFTGLVQYLG-D----RPVYGLQSPALTDPDL--------RVD
SLEDLAARYVQRIRAVQPHG--------PYHLVGYS-VGGQIAHEMAVQLTEG-------
GDEVATLAMLDT--HLTGGYGP-------------T------------------------
---TEK-PTVAALLAELGAVVPGDG-------DAAATTDRAVEVLRRTGGLFAAVTAD--
-------------DLDAVHRVFTQT-------------VDLALAH--------------R
PSTPIRA--------------------------DLLFFGAADSV---DAPTGVCA-----
---------WRPHISGEIIEH--AVPVSH-QQMTS------PEALAGIG-----------
-

#RHA1_ro02207|gb|NC_008268.1|_Actinobacteria_-_Rhodococcus_jostii_RHA1_NRPS-T1PKS_Thioesterase
---ALFCVHPAGG-LALGYAGLMKYVSPD----RPVYGLQLPILSG-GT--------TFE
SMAQLAHRYVVEMRAVQPHG--------PYHLLGWS-LGGVIAQAVAVELRES-------
GAEVGTLAMMDS--YVA-EGDN-------------F------------------------
---GDLEVNAEEWLHGLGVEFEGEG-----GDTGTSYREQLVEMLGRSFGRDPAFAST--
-------------LLGRISTGLENS-------------KEISTGY--------------R
PRVFDGD--------------------------LVFFSAAHSADGEEGERPSPSV-----
---------WQPAITGVIVEH--KVECDH-LRMTT------PEALAVIGPILERS-----
-

#RHA1_ro02319|gb|NC_008268.1|_Actinobacteria_-_Rhodococcus_jostii_RHA1_NRPS_Thioesterase
---PVFCFHPAGG-ISWGYSGLLRHIDDD----YPLYGVQASNLSTSER--------PPE
TLEDMAAEYIEHMRTVQPEG--------PYHLLGWS-LGGVVAHAIAGALQNQ-------
GEELGMLVMLDSFPSDAWAS-------------------MPTEQD--------------A
LAALLYMVGYD--PEPLLASDT------EPHRGGGLDRQQVIDILRGEGSALAGINE---
------------HTPAAMIDNFANA-------------VRLESEP--------------S
QIVVDSD--------------------------MLFFTAARNP--ATAATY---------
-------DLWRPYLTGTIVN--HDLDCEH-KDMTQ------PRWIGEVGS----------
-

#RHA1_ro02397|gb|NC_008268.1|_Actinobacteria_-_Rhodococcus_jostii_RHA1_NRPS_Thioesterase
---PLFCIHPAIG-LAWCYAGLGAHLGPD----RPVWGVQSPAVTVPGE--------RFA
SITQRAHRYVEEIRRVQPRG--------PYHLLGYS-VGGVIAHAMAVELRSR-------
GEEVGVLAMIDS--YAA-AER---------------------------------------
---DTPAPTLPELLTEFG---GGAS--------EHLGP-------------------E--
-------------QLTRLYEDYVDV-------------VDAAADF--------------V
PGHFDGD--------------------------LVFFGAAGNGS---QPAPASET-----
---------WRPWIDGDVIAH--TVDRPH-TRMTD------PEALAVIGPILAEY-----
-

#RHA1_ro04065|gb|NC_008268.1|_Actinobacteria_-_Rhodococcus_jostii_RHA1_T1PKS_Thioesterase
---PVFVFHPAGG-STVAYEPLLKRLPEG----TPMYGFERTEG----------------
PIEVRAAEYLPLIREIQG--DG------PYVLYGWS-LGGVLAYAVAKLLRES-------
GADVRIVGLIDT------------------------------------------------
--------------------------VMAGEKVEDTPDEIRKRWQRYAAFAKKTYNVDYP
-LPYDKLA--AAESDEEQIKILTELLKL------------------------------SG
TKIPGGIIEHQR-------------------------TSWLDNRAIQTAE----------
----------LAQYDGDVVLYMADRYHDDVMNLEP---------AFKTRKPDGGWGDAVK
N

#ABAYE3754|gb|NC_010410.1|_Proteobacteria_(Gamma)_-_Acinetobacter_baumannii_AYE_NRPS_Thioesterase
---PLWLFHPIGG-STFCYMELSRHLNPN----RTLRAIQSPGLIEADAAE--------V
AIEEMATLYIAEMQKMQP--QG------PYFLGGWC-FGGAIAYEISRQLRQM-------
GQQVTGIVMIDTRAPIPEN----------------VPEDADDAML---------------
------LSWFARDLAAP----YGKKLTIPAQYLRELSPDQMFDHVLKEAKAINVLPLDAD
PSDFRLYFDTYLANGIALQTYFPEPED---------------------------------
FPILLVKAKD---------------------------EQEDFGESLGWD-----------
-----------QLVKDTLTQVDLPGDHSSIMYAEN---------VVAVAQTIDQMY----
-

#AB57_0157|gb|NC_011586.1|_Proteobacteria_(Gamma)_-_Acinetobacter_baumannii_AB0057_NRPS_Thioesterase
---PLWLFHPIGG-STFCYMELSRHLNPN----RTLRAIQSPGLIEADAAE--------V
AIEEMATLYIAEMQKMQP--QG------PYFLGGWC-FGGAIAYEISRQLRQM-------
GQQVTGIVMIDTRAPIPEN----------------VPEDADDAML---------------
------LSWFARDLAAP----YGKKLTIPAQYLRELSPDQMFDHVLKEAKAINVLPLDAD
PSDFRLYFDTYLANGIALQTYFPEPED---------------------------------
FPILLVKAKD---------------------------EQEDFGESLGWD-----------
-----------QLVKDTLTQVDLPGDHSSIMYAEN---------VVAVAQTIDQMY----
-

#ABBFA_003403|gb|NC_011595.1|_Proteobacteria_(Gamma)_-_Acinetobacter_baumannii_AB307-0294_NRPS_Thioesterase
---PLWLFHPIGG-STFCYMELSRHLNPN----RTLRAIQSPGLIEADAAE--------V
AIEEMATLYIAEMQKMQP--QG------PYFLGGWC-FGGAIAYEISRQLRQM-------
GQQVTGIVMIDTRAPIPEN----------------VPEDADDAML---------------
------LSWFARDLAAP----YGKKLTIPAQYLRELSPDQMFDHVLKEAKAINVLPLDAD
PSDFRLYFDTYLANGIALQTYFPEPED---------------------------------
FPILLVKAKD---------------------------EQEDFGESLGWD-----------
-----------QLVKDTLTQVDLPGDHSSIMYAEN---------VVAVAQTIDQMY----
-

#Sare_0362|gb|NC_009953.1|_Actinobacteria_-_Salinispora_arenicola_CNS-205_NRPS_Thioesterase
---PLFCVHPGGG-SAHWYLRLVPHLAPD----IPVAAFEWPATHD-----------EIP
TAEQMAERYLAELRAAQPRG--------PYRLFSWC-GGSSIATEMARSLTEAG------
--EEVTFILLDPGLDAHTRAEG--------------------------------------
------WQELDYIRRLETLIEHIVADPQADTTDRRTEILALLDHLVDDVDPAVGITLPAQ
GVGDVWPRSVRIWREVMELDLAYRHNPYSG------------------------------
---------------------------------QLHLVVSDELERGEHEVAIGQTFG---
------DYVARWRELVEGGVTVHRVPGDHFGVMKP-------PHVAELGA----------
-

#Sare_3151|gb|NC_009953.1|_Actinobacteria_-_Salinispora_arenicola_CNS-205_T1PKS_Thioesterase
----ACIVPPIAPMIDTAYALFAQGLPE----PREVSAVRPLGFV----AGE----PLPA
DLPSLFRVYGDMLLEESGID--------PVAVVGHS-SGGWIAYGVAAYLCGI-------
GRPPAALVLLDTSWPGEFEIGV-------------QRDFMRAQAKR-HELGS--------
----------------------------DDGASLGHQLIAMGGYLRM--FDDWKP-----
---------------QLIEVP---------------------------------------
-----------------------------------SLLVRAAEYMTGAAKP---------
--------DEVLRANDGTVRDVASVPGNHFSMMSKYPV----ETATAVHTWL--------
-

#Sare_4562|gb|NC_009953.1|_Actinobacteria_-_Salinispora_arenicola_CNS-205_NRPS_Thioesterase
---PLFCIHPGAA-ICWSYADLLLHLSPD----FPVYGLQSPALSHPDE--------LPE
TLIQVADDCIEEMRQVQKTG--------PYYLLGQS-FGGVVAHAMAARLEAA-------
GEQVGLIVALDSEPSRSLSEHE-------------Q------------------------
---AQVIEATAKVYTGILEVLGVDP---AALPSGNLTFAQFSELARTTNTLLGNVAED--
-------------EFHLLMAILHGN-------------ISIATRH--------------R
SERVDAD--------------------------MLIFGAAEERE----RVLDPEV-----
---------WREFVGGEITYH--PIPTSH-STIMA------PEALQVIGPILEQH-----
-

#Sare_2072|gb|NC_009953.1|_Actinobacteria_-_Salinispora_arenicola_CNS-205_NRPS-T1PKS_Thioesterase
---PLFLIHPSGG-DVLCYGELARLLADD----RPVVGLTDP-ALTGGVG--------PT
DIPALAEHYLDAVRQHQPHG--------PYLLGGWS-MGGTLAHEMACLLERR------G
ER-TALLLMIDSNTPDRIRTLH-------------GQGAPQAI---------------AA
VRYLHSLAAFLDLDLGFGPAEEA---------ELLDRTGDDIRRAVTQRLRDAGLLSR--
-----------RDTADTRLLVFERH-------------LRILGEH--------------R
AGHLS-------------------------DPTTRLLLVRAALPSPHNSGVGMGVDDAPD
----LSRLGWDGHVRGPIHEV---VVEGHHYSLLT------GDAAKTIAEHLNRTL----
-

#Sare_2407|gb|NC_009953.1|_Actinobacteria_-_Salinispora_arenicola_CNS-205_T1PKS-NRPS_Thioesterase
---ALFCFPPAGG-HGLVYRQFAAQLPEW-R-IVGLNYLAGDDK----------------
-----VARYADLVERLQPAG--------PWLLLGYS-LGGNLAFEVTKELEGR-------
GRAVRDVIIVD------------------------SYRIVEPFEFG--------------
---------PDEFAAFERELAEHLLRHTGSEIVARETREQAREYIEFCRQTPNTG-----
--------------MVQAAVT---------------------------------------
-------------------------------VLSDRDKTALYAAGERGSWTGASAR----
--------GDTLLAGSGTH--AEMLDQEHAVHNA--------ALIREVL-----------
-

#Sare_2962|gb|NC_009953.1|_Actinobacteria_-_Salinispora_arenicola_CNS-205_NRPS_Thioesterase
---RLYCLHAVSG-SPYWYLPLSRALHPE----QPLDGFEAPGLEGDAEPV--------E
DLTALAARYVDALRERQP--AG------PYLLAGWS-MGGFLSFEMARQLAAV-------
GESPALVAMIDSNEPGPLPLPS-------------EQEVMET------------------
-----------------------FVSDLGGLAGTAPPVLPAEIARAASTD------PAVL
TAFLVEHGMVPADVRADF--------VS------------------------------HR
YRVFRANMRAVYG----------------YRPGPYAGRVVMVQAAEEPSR----------
--------AAWARHAGAMETVTLPGNHYSLWSAAH---------LPGLAAMIDARV----
-

#Radicicol
APPPFYMIADGTG-SIATYIHLASSLQSKMP----IYGIDSPFLRCP------DRLTPEV
GIPGAARLIVDALLKKQPDKDV------PFWIGGFS-GGAMVAYEVCRQLSAA-------
GRPVDGLLLIDMCAPRQ---VA---------AVPEDDGEVGLAMFDA-------------
-------------------------VSGQDESGVWSATDGTRRHLGAMFSCVATYNPEP-
-------------LPPRGGGN-------------TPAKRAAMIWARKG------------
----MIDRCVSSVRFRQMLADRGISPEPYPGFMEDPKLGAVAWSLPHKTGAD--------
----LGPNGWERYLGGDRLLCMSIEA--DHLEMPTPGYAQLLGETMDKAFR---------
-

#dehydrocurvulacin
-----YMMADGTG-TIATYIHLP-AFKSKMP----VYGIDSPFLRCP------SRLTKDV
GIPGVAKLIVDALVTAQPTG--------PLMIGGFS-AGSIVAYEVTRQLGAL-------
GRQVTGLVLIDMCCPRSSLLDE---------DAMNSEDDASFAIFEN-------------
-------------------------AVSKD--GLWSLASTTQDHFRAYHVAMHAYHPPY-
-------------MTAQ-----------------ERPSHTAVIWAEKG------------
----MVNRVVGNDRLMQMLADQGIPTTSYPGYMEDPRLGAFACLVPDRTAAD--------
----LGPNGWEKYTAG-EVLALSVAG--DHLDL---------------------------
-

#DebsTE
-VTVICCAGTAAISGPHEFTRLAGALRG----IAPVRAVPQPGYE----EGE----PLPS
SMAAVAAVQADAVIRTQGDK--------PFVVAGHS-AGALMAYALATELLDR-------
GHPPRGVVLIDVYPP---GHQD-------------AMNAWLEEL----------------
---------TATLFDRET--------VRMDD----TRLTALGAYDRL--TGQWR------
--------------PRETGLP---------------------------------------
-----------------------------------TLLVSAGEPMGPWP---DDS-----
---------WKPTWPFEHD--TVAVPGDHFTMVQ--EH--ADAIARHIDAWLG-------
-

#FenTE
---NLFCFPPISG-FGIYFKDLALQLNHKAA-VYGFHFIEEDSR----------------
-----IEQYVSRITEIQPEG--------PYVLLGYS-AGGNLAFEVVQAMEQK-------
GLES-DFIIVD---AYK-KDQS-------------ITADTENDD----------------
----------SAAYLPEAVR--------------ETVMQKKRCYQEYWAQLINEGRIKSN
--------------IHFIEAG---------------------------------------
----------------------------------IQTETSGAMVLQKWDA--AEEG----
---------YAEYTGYGAH--KDMLEGEFAEKNA--NI--ILNILD--------------
-

#PikTE
-AVLVGCTGTAANGGPHEFLRLSTSFQE----ERDFLAVPLPGYGT--GTGTG-TALLPA
DLDTALDAQARAILRAAGDA--------PVVLLGHS-GGALLAHELAFRLERAHG-----
-APPAGIVLVDPYPP---GHQE-------------PIEVWSRQLG---------------
----------EGLF--AGELE------PMSD----ARLLAMGRY-AR--FLAGP------
-------------RPGRSSAP---------------------------------------
-----------------------------------VLLVRASEPLGDWQ---EERG----
--------DWRAHWDLPHT--VADVPGDHFTMMR--DH--APAVAEAVLSWLD-------
-

#CuracinTE
FGGNQICLCSWGSPEHPVVLCIHGILEQGLAWQEVALPLAAQGYRVVAPDLFG---HGRS
SHLEMVTSYSSLTFLAQIDRVIQELPDQPLLLVGHS-MGAMLATAIASVRPKK-------
---IKELILVELPLPAEESKKE--------------------------------------
----------------------------SAVNQLTTCLDYLSSTPQHPIFPDVATAASR-
-------------LRQAIPSLSEEFS----------------------------------
----------------------------------YILAQRITQPNQGGVRWS--------
---------WDAIIRTRSILGLNNLPGGRSQYLEMLKS------IQVPTTLVYGD-----
-

#SurfactinTE
--QIIFAFPPVLG-YGLMYQNLSSRLPSY-K-LCAFDFIEEEDR----------------
-----LDRYADLIQKLQPEG--------PLTLFGYS-AGCSLAFEAAKKLEGQ-------
GRIVQRIIMVD---SYKKQG-V-------------SDLDGRTVESD--------------
---------VEALMNVNRDN-----EALNSEAVKHGLKQKTHAFYSYYVNLISTG-----
--------------QVKADID---------------------------------------
---------------------------------LLTSGADFDIPEWLASWEEATTG----
--------AYRMKRGFGTH--AEMLQGETLDRNAG--------ILLEFLN----------
-

#Tiacumicin_(R-ester)
--RLICVPSPMGLGGAHQYARLATALRG----TREVHALSIPGFR----QSE----ALPE
SAGAAVEWLAASLLQIVGDE--------PYALVGYS-SGGLFAQRLAGLLED-------R
GRPAAGLVLLDTYLPDS-AAME--------------QFATPMLEGLFAR-----------
--------------------------EESFGPFTSARLSAMGRYVRL--IAECEA-----
---------------PPVTTP---------------------------------------
-----------------------------------TLFVRP-------AELFRVDGADPD
AAPAVS-----WRATWPSAAATVEVPGNHFTMLESEAA----GTARVIEQWL--------
-

#TesA_(P.aeru_esterase)
-----MRALLLSG--CLALVLLTQQAAAQT---LLVVGDSISAALG------------LD
TSQGWVALLQKRLADEG----------YDYRVVNASISGDTSAGGLARLPALL-------
AEEKPALVVIELGGNDGLRGMAP-------------------------------------
--------------------------AQLQQNLASMAQKARAEGAKVLLLGIQLPPNYG-
-----------PRYIEAFSRVYG-------------------------------------
-----------------------------------AVAAQEKTALVPFFLEG--------
---------VGGVQGMMQADGIHPALAAQPRLLEN--------VWPTLKPLL--------
-

#FabA
----------VDKRESYTKEDLLASGRGE------LFGAKGPQLPAPNMLMMDRVVKMTE
TGGNFDKGYVEAELDINPDLWFFG-----CHFIGDPVMPGCLGLDAMWQLVGF-------
-----YLGWLGGEGKGRALGVG--------------------------------------
---------------------------EVKFTGQVLPTAKKVTYRIHFKRIVNRR-----
------------------------------------------------------------
-----------------------------------LIMGLADG-----------------
----------EVLVDGRLIYTASDLKVGLFQDTSAF------------------------
-
